# Supplementary material for: Probing regenerative heterogeneity of corticospinal neurons with scRNA-Seq
Source: Research Square preprint supplement (doi:10.21203/rs.3.rs-2588274/v1), 2023-02-21
Supplement: Supplementary file 1 [file 1f0a1d9f80ea69e5498f79c6.xlsx]

## Sheet: Included
Paper	Region	Method	Age	Regen Classifier (Neurons)	Source	Methods
Jessa et al., 2019	Cortex	Single Cell	Embryonic (E12.5, E15.5)	Regen	GSE133531	10X V2
Yao et al., 2021	Motor Cortex	Single Cell	Adult (7~9 weeks)	Mix	nemo:dat-ch1nqb7	10X V3
Bhattacherjee et al., 2019	Prefrontal Cortex	Single Cell	Juvenile (3 weeks)	Mix	GSE124952	10X V2
			Adult (8-9 weeks)	Non-regen
Romanov et al., 2017	Hypothalamus	Single Cell	Juvenile (3-5 weeks)	Mix	GSE74672	Fluidigm C1
Campbell et al., 2017	Hypothalamus	Single Cell	Adult (4-12 weeks)	Non-regen	GSE93374	Drop-seq
Chen et al., 2017	Hypothalamus	Single Cell	Adult (8-10 weeks)	Non-regen	GSE87544	Drop-seq
Tasic et al., 2015	Visual Cortex	Single Cell	Adult (8 weeks)	Non-Regen	GSE71585	SMARTseq
Zeisel et al., 2015	Sensory Cortex	Single Cell	Juvenile (3-5 weeks)	Non-Regen	GSE60361	Fluidigm C1
Peng J et al., 2019	Cerebellum	Single Cell	Postnatal (P0, P8)	Regen	GSE122357	10X V2
Usoskin et al., 2015	DRG	Single Cell	Adult (6-8 weeks)	Regen	GSE59739	Picking
Avraham et al., 2021	DRG	Single Cell	Adult (8–12 weeks)	Regen (Condition dependent)	GSE139103	10X V2, V3
Avraham et al., 2020	DRG	Single Cell	Adult (8–12 weeks)	Regen (Condition dependent)	GSE158892	10X V3
Okaty et al., 2020	Raphe Nucleus	Single Cell	Adult (5-10 weeks)	Regen	GSE144980	10X V3
La Manno et al., 2016	Ventral Midbrain (SNc, VTA)	Single Cell	Adult (4-8 weeks)	Non-regen	GSE76381	Fluidigm C1
	Ventral Midbrain	Single Cell	Embryonic (E11.5,E18.5)	Regen
Shekhar et al., 2022	Retina	Single Cell	Embryonic (E13,14,16,P0,P5)	Regen	GSE185671	10X V2
Tran et al., 2019	Retina	Single Cell	Adult (P56)	Non-regen (Condition dependent)	GSE137400	10X V2
Jacobi et al., 2022	Retina	Single Cell	Adult (4-12 weeks)	Non-regen (Condition dependent)	GSE202155	10X V3
Delile et al, 2019	Spinal Cord	Single Cell	Embryonic (E9.5-13.5)	Regen	E-MTAB-7320	10X V2
Liau et al., 2023	Spinal Cord	Single Cell	Embryonic (E13.5)	Regen	GSE183759	10X V2
Hayashi et al., 2018	Spinal Cord	Single Cell	Postnantal (P0-3)	Regen	GSE108788	10X V2
Milich et al., 2020	Spinal Cord	Single Cell	Adult (8-10 weeks)	Non-regen (Condition dependent)	GSE162610	10X V2, V3
Zeisel et al., 2018	Spinal Cord	Single Cell	Juvenile (3-4 weeks)	Mix (~Non-regen)	http://mousebrain.org/adolescent/downloads.html	10X V2
	DRG	Single Cell	Juvenile (3-4 weeks)	Regen
	Ventral Midbrain	Single Cell	Juvenile (3-4 weeks)	Mix (~Regen)
	Cerebellum	Single Cell	Juvenile (3-4 weeks)	Mix (~Regen)
Beine et al., 2022	Cortex (CST)	Single Nucleus	Adult (6-8 weeks)	Non-regen	GSE212409	10X V3
Hu et al., 2017	Cortex, Cell line	Single Nucleus	Adult (6-8 weeks)	Unknown	GSE106678	Drop-seq
Sathyamurthy et al., 2018	Spinal Cord	Single Nucleus	Adult (8-12 weeks)	Unknown	GSE103892	Drop-seq
Matson et al., 2022	Spinal Cord	Single Nucleus	Adult 12–30 weeks)	Unknown	GSE172167	10X V2
