# Supplementary material for: Probing regenerative heterogeneity of corticospinal neurons with scRNA-Seq
Source: Research Square preprint supplement (doi:10.21203/rs.3.rs-2588274/v1), 2023-02-21
Supplement: Supplementary file 2 [file 5c264d6af6988998250ff5c5.xlsx]

## Sheet: 3A. Overexpressed
external_gene_name	baseMean	log2FoldChange	lfcSE	stat	pvalue	padj
Setd3	38.5991	5.01708	0.275174	18.2324	2.85e-74	1.04e-69
Atp5a1	43.2412	5.02193	0.280785	17.8853	1.53e-71	2.79e-67
Ptgds	20.0454	4.4392	0.259331	17.1179	1.09e-65	1.32e-61
Psma3	100.972	4.94556	0.298054	16.5929	7.85e-62	7.14e-58
Tmem59	22.7182	4.34643	0.268624	16.1804	6.94e-59	5.04e-55
Acot7	30.9777	4.22284	0.272218	15.5127	2.85e-54	1.48e-50
Atpif1	17.7167	4.01152	0.258498	15.5186	2.6e-54	1.48e-50
Atp6v1g1	12.3913	3.98461	0.257217	15.4912	3.98e-54	1.81e-50
Cck	34.0828	4.0216	0.263198	15.2798	1.04e-52	4.22e-49
Atf4	23.3278	3.98824	0.264201	15.0955	1.73e-51	6.31e-48
Ubqln1	27.9859	3.889	0.264012	14.7304	4.11e-49	1.36e-45
Ubb	32.2719	4.12618	0.281376	14.6643	1.09e-48	3.31e-45
Grina	17.6096	3.75681	0.257406	14.5949	3.03e-48	8.47e-45
Mphosph8	23.1809	3.82241	0.26441	14.4564	2.28e-47	5.93e-44
Nptn	56.7402	3.68956	0.255923	14.4167	4.06e-47	9.85e-44
Zfand5	34.1366	3.89126	0.271891	14.3119	1.84e-46	4.19e-43
Brinp1	54.5888	3.82521	0.267941	14.2763	3.08e-46	6.58e-43
Uqcrfs1	80.8106	4.19966	0.294653	14.2529	4.3e-46	8.69e-43
Vdac2	15.6524	3.50678	0.251316	13.9537	2.99e-44	5.72e-41
Atp5c1	14.8001	3.416	0.246778	13.8424	1.41e-43	2.55e-40
Eif3f	39.0308	4.03915	0.29269	13.8001	2.55e-43	4.21e-40
Gabra1	37.814	3.83235	0.27849	13.7612	4.36e-43	6.9e-40
Mrpl18	11.1894	3.29931	0.24133	13.6714	1.51e-42	2.28e-39
Arpc5	33.9109	3.44686	0.253402	13.6023	3.88e-42	5.59e-39
Nudt4	12.878	3.3555	0.246774	13.5974	4.15e-42	5.59e-39
Tagln3	10.1007	3.48004	0.255903	13.599	4.06e-42	5.59e-39
Stx7	16.1998	3.43345	0.25269	13.5876	4.74e-42	6.16e-39
Tspan7	63.3534	3.8416	0.283439	13.5536	7.55e-42	9.47e-39
Chgb	29.2967	3.72917	0.277026	13.4614	2.64e-41	3.2e-38
Apoe	51.0371	3.31448	0.247024	13.4177	4.76e-41	5.59e-38
Atp6v1a	58.5757	3.78453	0.284513	13.3018	2.26e-40	2.57e-37
Bmi1	13.4424	3.14685	0.236676	13.2961	2.44e-40	2.69e-37
Rps29	17.6646	3.34864	0.255954	13.0829	4.12e-39	4.41e-36
Dynll1	41.3476	3.17029	0.243895	12.9986	1.25e-38	1.3e-35
Tpt1	160.04	3.39221	0.264414	12.8291	1.13e-37	1.14e-34
Cend1	10.1974	3.24108	0.253978	12.7613	2.7e-37	2.65e-34
Cplx2	14.9876	3.17736	0.250105	12.7041	5.61e-37	5.37e-34
Cox4i1	47.4303	3.19515	0.251792	12.6897	6.75e-37	6.29e-34
Ap1s1	9.18486	3.01044	0.240013	12.5428	4.35e-36	3.96e-33
Uqcrq	11.0474	3.1452	0.252157	12.4732	1.05e-35	9.28e-33
Rpl14	16.6732	3.33601	0.268634	12.4184	2.08e-35	1.8e-32
Aldoc	47.2649	3.44834	0.27893	12.3628	4.16e-35	3.52e-32
Zrsr2	22.1288	3.31552	0.268379	12.3539	4.64e-35	3.84e-32
Rpl4	37.9445	3.60352	0.293377	12.2829	1.12e-34	9.04e-32
Morf4l2	53.9329	3.09079	0.252272	12.2518	1.64e-34	1.3e-31
Ndufb10	13.7247	3.0711	0.250756	12.2474	1.74e-34	1.34e-31
Stau2	27.3165	2.89078	0.241119	11.989	4.06e-33	3.01e-30
Eif1ax	23.7457	2.91255	0.243098	11.981	4.47e-33	3.25e-30
Ndufv1	10.7366	2.76435	0.231425	11.9449	6.9e-33	4.83e-30
Ccndbp1	6.81744	2.70671	0.226992	11.9242	8.85e-33	6.07e-30
Rps5	41.1142	3.19108	0.267648	11.9227	9.02e-33	6.07e-30
Syt13	44.8484	3.06456	0.259655	11.8024	3.79e-32	2.51e-29
Gm11837	4.29106	2.54514	0.21681	11.739	8.04e-32	5.22e-29
Mtx2	9.74848	2.72529	0.232394	11.727	9.27e-32	5.91e-29
Apbb1	17.4975	2.70776	0.231475	11.6978	1.31e-31	8.2e-29
Pdp1	104.304	2.75803	0.237407	11.6173	3.37e-31	2.08e-28
Gabarapl1	58.252	3.58077	0.311272	11.5037	1.26e-30	7.42e-28
Scg2	32.6646	2.82115	0.245309	11.5004	1.31e-30	7.58e-28
Bex2	6.48444	2.67533	0.233774	11.4441	2.52e-30	1.41e-27
Atp6v0e2	7.1762	2.50948	0.220734	11.3688	5.98e-30	3.3e-27
Atp5md	14.2867	2.93655	0.259001	11.338	8.51e-30	4.62e-27
Ndrg2	70.6035	3.30541	0.291757	11.3293	9.39e-30	5.02e-27
Glul	40.6698	3.19947	0.282449	11.3276	9.58e-30	5.05e-27
Map4k3	30.6603	2.98061	0.264624	11.2636	1.99e-29	1.03e-26
Vti1b	26.3569	2.87771	0.256739	11.2087	3.7e-29	1.87e-26
Tex2	8.82412	2.57432	0.229806	11.2021	3.98e-29	1.98e-26
Gm42372	29.1934	2.66515	0.240563	11.0788	1.59e-28	7.82e-26
Rgs8	26.1352	2.78944	0.254537	10.9589	6.02e-28	2.92e-25
Atp1a1	9.80957	2.56513	0.236061	10.8664	1.67e-27	7.98e-25
Edrf1	53.3305	2.82362	0.260027	10.859	1.81e-27	8.54e-25
Ckb	42.9976	2.87146	0.264619	10.8513	1.97e-27	9.17e-25
Ndufb9	21.8557	2.56699	0.238697	10.7542	5.66e-27	2.61e-24
Cisd1	4.80992	2.39833	0.223069	10.7515	5.83e-27	2.65e-24
Mtss1	36.281	2.71915	0.253675	10.719	8.29e-27	3.71e-24
Ndufv2	11.3052	2.50842	0.234034	10.7182	8.36e-27	3.71e-24
Tuba1a	119.729	3.27422	0.306252	10.6913	1.12e-26	4.9e-24
Nr1d2	12.2724	2.7579	0.258548	10.6669	1.45e-26	6.3e-24
Rcan1	17.9518	2.94568	0.276209	10.6647	1.49e-26	6.37e-24
Gas5	14.3901	2.35832	0.221388	10.6524	1.7e-26	7.18e-24
Yaf2	15.232	2.4897	0.235692	10.5634	4.41e-26	1.84e-23
Enc1	182.783	2.86989	0.273468	10.4944	9.16e-26	3.79e-23
Yeats4	4.84501	2.21108	0.213614	10.3508	4.15e-25	1.68e-22
Cx3cl1	7.19844	2.27947	0.221665	10.2834	8.37e-25	3.35e-22
Prkar1a	50.7576	2.95792	0.287741	10.2798	8.69e-25	3.44e-22
Cct6a	13.5031	2.40188	0.234169	10.257	1.1e-24	4.26e-22
Cox7c	20.496	2.62953	0.257396	10.2159	1.68e-24	6.45e-22
Hacd3	35.7551	2.49132	0.244156	10.2038	1.91e-24	7.22e-22
Atad1	8.69094	2.20329	0.216294	10.1866	2.28e-24	8.54e-22
Hnrnpdl	79.5538	2.61827	0.257521	10.1672	2.78e-24	1.02e-21
Atp6v0b	8.2855	2.3477	0.231749	10.1304	4.05e-24	1.47e-21
Hpcal4	62.1406	2.50439	0.247528	10.1176	4.62e-24	1.66e-21
Pou3f3	14.0415	2.32906	0.231422	10.0641	7.96e-24	2.84e-21
Tppp	24.2985	2.50682	0.249194	10.0597	8.33e-24	2.94e-21
Rps15a	8.1676	2.23833	0.224318	9.97838	1.9e-23	6.57e-21
Rps11	49.8021	2.48133	0.249172	9.95831	2.32e-23	7.96e-21
Stmn1	14.8277	2.43625	0.244715	9.95548	2.39e-23	8.11e-21
Pcsk2	18.7971	2.31954	0.234995	9.87062	5.58e-23	1.88e-20
Tspan13	9.42153	2.34651	0.238128	9.85398	6.59e-23	2.2e-20
Ndufaf7	19.0437	2.71302	0.276704	9.80479	1.07e-22	3.55e-20
Rpl22l1	10.8843	2.44315	0.24939	9.79651	1.17e-22	3.78e-20
Rpl38	10.771	2.51508	0.257133	9.78127	1.36e-22	4.36e-20
Cnp	6.33891	2.12619	0.217625	9.76998	1.51e-22	4.83e-20
Acly	9.67572	2.20824	0.22635	9.75585	1.74e-22	5.51e-20
Psmc2	6.57781	2.0413	0.209374	9.74954	1.85e-22	5.81e-20
Elp3	12.1368	2.48777	0.255742	9.72768	2.3e-22	7.08e-20
P4hb	58.3846	2.18061	0.224153	9.72823	2.29e-22	7.08e-20
Atp6v1e1	37.5689	2.17258	0.223399	9.72512	2.36e-22	7.2e-20
Sdhaf4	30.1878	2.17386	0.225117	9.65657	4.61e-22	1.39e-19
Elmod1	16.8497	2.42685	0.25347	9.57451	1.02e-21	3.05e-19
Arhgef4	20.7208	2.33706	0.246202	9.49248	2.26e-21	6.67e-19
Nrn1	44.0289	2.28936	0.241238	9.49003	2.31e-21	6.77e-19
Acp1	17.3416	2.20037	0.232222	9.4753	2.66e-21	7.74e-19
Tmem179	10.194	2.18697	0.230932	9.47019	2.79e-21	8.06e-19
Serinc1	41.7441	2.75045	0.291307	9.44174	3.67e-21	1.05e-18
Ldhb	13.4722	2.31716	0.246277	9.40876	5.02e-21	1.43e-18
Antkmt	5.12666	2.11446	0.225303	9.38496	6.29e-21	1.77e-18
Ptbp2	18.7972	2.18689	0.233207	9.37747	6.76e-21	1.89e-18
Eif4b	13.4749	2.2456	0.240251	9.34689	9.03e-21	2.51e-18
Snap47	11.027	2.3569	0.252439	9.33651	9.96e-21	2.74e-18
Prdx1	7.80029	1.91525	0.205171	9.33488	1.01e-20	2.77e-18
Atp5pb	20.0001	2.63252	0.282255	9.32674	1.09e-20	2.96e-18
Rps2	28.9243	2.47669	0.266013	9.31038	1.27e-20	3.43e-18
Mdh1	118.09	3.20082	0.344245	9.29809	1.43e-20	3.82e-18
Srpk2	73.5754	2.55235	0.275375	9.26864	1.89e-20	5.01e-18
Cntd1	7.96896	2.01861	0.217845	9.26629	1.93e-20	5.08e-18
Psmb1	15.3887	2.33673	0.25272	9.24634	2.32e-20	6.08e-18
Eef1a2	8.3864	2.1349	0.231103	9.23787	2.51e-20	6.53e-18
Slc25a5	7.71322	2.28944	0.248527	9.21202	3.2e-20	8.2e-18
Rnf220	20.2618	2.38055	0.258672	9.20298	3.48e-20	8.86e-18
Atp2b4	15.9562	2.14637	0.234198	9.16479	4.96e-20	1.25e-17
Klf15	14.4206	2.22699	0.243448	9.1477	5.82e-20	1.46e-17
Plpp3	32.029	2.30757	0.252974	9.12177	7.39e-20	1.83e-17
Atp2a2	72.5066	2.77059	0.304005	9.11363	7.97e-20	1.96e-17
Gm48226	18.0934	2.4349	0.267658	9.09706	9.28e-20	2.27e-17
Rps14	17.2911	1.94146	0.213921	9.0756	1.13e-19	2.74e-17
Slc38a2	72.1421	2.33637	0.257655	9.06781	1.21e-19	2.93e-17
Saraf	16.565	1.95694	0.217181	9.01067	2.05e-19	4.87e-17
Adss	13.2636	2.1447	0.238447	8.99442	2.37e-19	5.61e-17
Rps13	13.3067	2.23462	0.248539	8.99102	2.45e-19	5.75e-17
Ivns1abp	13.9077	2.24436	0.250359	8.96455	3.12e-19	7.26e-17
Gm9892	3.56462	1.77766	0.19876	8.94372	3.76e-19	8.72e-17
Gm45620	4.57132	1.98331	0.222175	8.92681	4.38e-19	1.01e-16
Ahcyl1	19.5514	2.2312	0.25023	8.91658	4.81e-19	1.1e-16
Otulin	7.21071	1.93702	0.217343	8.91229	5e-19	1.14e-16
Micos13	6.74944	1.79868	0.202633	8.87653	6.9e-19	1.55e-16
Hbb-bs	15.2975	2.5442	0.286746	8.87267	7.14e-19	1.59e-16
Gpi1	12.1094	2.11969	0.240474	8.81463	1.2e-18	2.66e-16
AI593442	12.3453	2.00568	0.22795	8.79878	1.38e-18	3.05e-16
Erp29	13.2904	2.03423	0.231503	8.78702	1.54e-18	3.34e-16
Hdac11	8.0284	1.83889	0.210076	8.75344	2.07e-18	4.45e-16
Scn2b	7.64095	1.94397	0.222142	8.75105	2.11e-18	4.52e-16
Cd81	212.981	2.55348	0.292612	8.72651	2.63e-18	5.55e-16
Atp5g3	21.1629	2.27873	0.261764	8.7053	3.17e-18	6.66e-16
Ndufc1	7.2905	1.85655	0.213295	8.70414	3.2e-18	6.69e-16
Armc8	16.8771	1.96227	0.226931	8.64699	5.29e-18	1.09e-15
Phospho2	11.2374	1.84407	0.213603	8.63315	5.97e-18	1.23e-15
Trim44	18.3631	1.83141	0.212203	8.63049	6.11e-18	1.25e-15
Tmem176a	4.43872	1.80669	0.210222	8.59422	8.38e-18	1.69e-15
Fkbp1a	31.8258	2.32563	0.271978	8.5508	1.22e-17	2.46e-15
Rbm39	31.3118	2.22915	0.262568	8.48981	2.07e-17	4.14e-15
Fbxo33	10.477	1.90072	0.22411	8.48117	2.23e-17	4.43e-15
Plppr4	76.2497	2.09423	0.247786	8.45178	2.87e-17	5.64e-15
Anapc13	5.13575	1.73729	0.205849	8.43965	3.18e-17	6.22e-15
Gstm5	19.5795	1.7398	0.206474	8.42622	3.57e-17	6.94e-15
Ran	32.5988	2.34192	0.278036	8.42309	3.67e-17	7.09e-15
Rps3	28.0564	2.39372	0.28478	8.40552	4.26e-17	8.15e-15
Gpm6a	135.246	2.59756	0.309263	8.39919	4.5e-17	8.56e-15
Ppp3r1	63.9786	2.66519	0.317521	8.39374	4.71e-17	8.92e-15
Gm12846	3.24921	1.5996	0.191519	8.35216	6.7e-17	1.26e-14
Gm9068	2.82044	1.61469	0.19347	8.34594	7.06e-17	1.32e-14
Dkk3	31.8051	2.13001	0.25574	8.32882	8.17e-17	1.52e-14
Gm17997	2.3726	1.53791	0.186057	8.26581	1.39e-16	2.56e-14
Appbp2	95.8934	2.12028	0.259261	8.17818	2.88e-16	5.24e-14
Rpl36a-ps2	3.24013	1.68174	0.206015	8.16316	3.26e-16	5.91e-14
Phf24	8.50939	1.78571	0.219777	8.12507	4.47e-16	8.05e-14
Aplp2	15.4845	1.97708	0.243443	8.12132	4.61e-16	8.26e-14
Cct3	26.0999	2.1665	0.267225	8.10738	5.17e-16	9.22e-14
Oxr1	22.9744	2.0851	0.25767	8.09212	5.86e-16	1.04e-13
Plaat3	6.28687	1.74162	0.215671	8.07537	6.73e-16	1.19e-13
Uhrf1bp1l	29.7467	2.01525	0.251456	8.0143	1.11e-15	1.95e-13
Umad1	13.7606	1.98874	0.248744	7.99513	1.29e-15	2.26e-13
Calm3	12.9528	1.78628	0.223884	7.97862	1.48e-15	2.58e-13
NA	4.8647	1.62763	0.204171	7.97193	1.56e-15	2.71e-13
Vamp1	72.0149	1.89869	0.238254	7.96915	1.6e-15	2.75e-13
Rps16	4.50881	1.62992	0.204612	7.9659	1.64e-15	2.8e-13
Osbpl2	19.4498	1.73479	0.217852	7.96313	1.68e-15	2.84e-13
Slc8a1	32.9037	2.00421	0.251675	7.9635	1.67e-15	2.84e-13
Cds1	7.72886	1.80042	0.226278	7.95668	1.77e-15	2.98e-13
Hdac4	13.1032	1.65501	0.208862	7.92394	2.3e-15	3.86e-13
Gm37897	3.19477	1.4372	0.182194	7.88825	3.06e-15	5.09e-13
Rpl28	6.71984	1.68949	0.214196	7.88757	3.08e-15	5.09e-13
Drap1	6.17605	1.6519	0.209518	7.88431	3.16e-15	5.18e-13
Poc5	4.72902	1.54764	0.196288	7.88453	3.16e-15	5.18e-13
Gm7936	3.04233	1.56906	0.199525	7.86401	3.72e-15	6.04e-13
Lrp1b	46.8447	1.98953	0.253405	7.85117	4.12e-15	6.66e-13
Dynlrb1	7.20906	1.68737	0.215515	7.82948	4.9e-15	7.88e-13
S100a4	2.29302	1.42182	0.181632	7.828	4.96e-15	7.94e-13
Gm38358	2.75403	1.49738	0.191508	7.81886	5.33e-15	8.5e-13
Gm7496	2.98165	1.48543	0.190079	7.81482	5.5e-15	8.74e-13
Cluh	8.71143	1.7534	0.224446	7.81212	5.62e-15	8.89e-13
NA	3.13929	1.57196	0.201355	7.80693	5.86e-15	9.23e-13
Rab6a	245.858	2.36229	0.302842	7.80042	6.17e-15	9.63e-13
Gm48914	3.21793	1.48584	0.190932	7.78206	7.14e-15	1.11e-12
Ubb-ps	4.17754	1.56723	0.203277	7.7098	1.26e-14	1.95e-12
Cst3	132.484	2.22726	0.290683	7.66214	1.83e-14	2.82e-12
Gm8624	3.87109	1.57004	0.205135	7.65369	1.95e-14	2.99e-12
Trnp1	6.9237	1.69813	0.221876	7.65349	1.96e-14	2.99e-12
Ghitm	10.4807	1.74616	0.228698	7.63521	2.25e-14	3.43e-12
Gnb1	12.2316	1.81869	0.238598	7.62239	2.49e-14	3.77e-12
Olfr77	7.50849	1.65041	0.2169	7.60909	2.76e-14	4.17e-12
Gm47237	2.91136	1.32987	0.174911	7.60315	2.89e-14	4.34e-12
Cadps2	16.2641	1.82046	0.240415	7.57218	3.67e-14	5.47e-12
Coq2	19.8979	2.19395	0.290818	7.54405	4.56e-14	6.74e-12
Gm45607	1.84204	1.36095	0.181073	7.516	5.65e-14	8.32e-12
Slc1a2	151.755	2.21897	0.295923	7.49845	6.46e-14	9.47e-12
Gm29920	1.99444	1.31221	0.175566	7.47415	7.77e-14	1.13e-11
Ctnnb1	62.0786	2.01175	0.269958	7.4521	9.19e-14	1.33e-11
Cttnbp2nl	5.26362	1.54598	0.207579	7.44764	9.5e-14	1.37e-11
Gm15501	2.73178	1.37534	0.185234	7.42489	1.13e-13	1.62e-11
Gm5451	3.20096	1.45695	0.197109	7.39159	1.45e-13	2.08e-11
Gm18943	2.99611	1.42282	0.192534	7.38994	1.47e-13	2.1e-11
Gm46203	2.22888	1.34152	0.181567	7.38856	1.48e-13	2.11e-11
Pebp1	11.4724	1.5419	0.208848	7.38291	1.55e-13	2.19e-11
Rab11fip2	48.774	1.77891	0.24185	7.35543	1.9e-13	2.67e-11
Rpl21	42.3038	2.07664	0.282537	7.34995	1.98e-13	2.77e-11
Olfr1218	2.54309	1.25188	0.170922	7.32425	2.4e-13	3.34e-11
Cxxc5	11.6505	1.48114	0.203032	7.29509	2.98e-13	4.13e-11
Psd3	50.8274	2.03894	0.280715	7.2634	3.77e-13	5.2e-11
Chtop	16.4525	1.51055	0.208173	7.25625	3.98e-13	5.46e-11
Gm42447	5.17208	1.50779	0.208122	7.24472	4.33e-13	5.93e-11
Rpl17	25.3724	1.69031	0.233601	7.23589	4.62e-13	6.3e-11
Cnbp	20.9696	1.93024	0.266994	7.22951	4.85e-13	6.58e-11
Smpd1	3.47865	1.46354	0.202478	7.22817	4.9e-13	6.62e-11
Itm2c	38.112	2.10138	0.290868	7.22453	5.03e-13	6.77e-11
Gm9416	2.16496	1.28912	0.178528	7.22083	5.17e-13	6.91e-11
Ryr2	48.1294	1.77695	0.246241	7.21631	5.34e-13	7.12e-11
Serp1	54.2176	1.60576	0.22261	7.2133	5.46e-13	7.25e-11
Mto1	6.45528	1.47162	0.204565	7.19387	6.3e-13	8.33e-11
Grk3	14.9089	1.63097	0.227157	7.1799	6.98e-13	9.19e-11
Atp5l-ps2	2.11969	1.23144	0.171618	7.17544	7.21e-13	9.43e-11
Gm10484	3.29887	1.33638	0.186235	7.17576	7.19e-13	9.43e-11
Med24	4.9976	1.36464	0.190933	7.1472	8.86e-13	1.15e-10
Pcdh7	17.0296	1.66896	0.2336	7.14452	9.03e-13	1.17e-10
Gm15427	6.19477	1.51152	0.211914	7.1327	9.84e-13	1.27e-10
4930478E11Rik	2.13376	1.1884	0.167013	7.11562	1.11e-12	1.44e-10
H2az1	7.26046	1.57987	0.222065	7.11444	1.12e-12	1.44e-10
Rps7-ps3	3.60037	1.47942	0.207977	7.11338	1.13e-12	1.45e-10
Rtn4	123.075	2.28545	0.322295	7.09117	1.33e-12	1.69e-10
Fbxw18	2.21753	1.21737	0.171771	7.08721	1.37e-12	1.73e-10
Uchl1	6.31325	1.47188	0.208555	7.05753	1.69e-12	2.13e-10
Rpsa-ps9	2.43769	1.26259	0.178979	7.05439	1.73e-12	2.17e-10
Rpsa-ps10	3.22081	1.38981	0.197166	7.04893	1.8e-12	2.25e-10
Pja2	36.0184	1.97838	0.280794	7.04564	1.85e-12	2.3e-10
Gm43839	2.50041	1.26344	0.179387	7.04309	1.88e-12	2.33e-10
Zwint	241.955	2.27799	0.323994	7.03096	2.05e-12	2.54e-10
Susd4	17.3955	1.66941	0.237507	7.02889	2.08e-12	2.56e-10
Rab12	5.90046	1.43732	0.204572	7.02599	2.13e-12	2.59e-10
D030024E09Rik	3.75695	1.36577	0.194715	7.01423	2.31e-12	2.81e-10
Spats2l	8.84592	1.48424	0.211784	7.00828	2.41e-12	2.93e-10
AA986860	2.8973	1.25787	0.179726	6.99882	2.58e-12	3.12e-10
Gm43415	2.71684	1.32129	0.188826	6.99741	2.61e-12	3.14e-10
Dnm1	17.4468	1.57304	0.225015	6.99082	2.73e-12	3.28e-10
Pdxp	6.04735	1.54346	0.221739	6.96071	3.39e-12	4.05e-10
Mrpl33	19.1201	1.51874	0.218206	6.96012	3.4e-12	4.05e-10
Kpnb1	9.89822	1.53723	0.22102	6.95519	3.52e-12	4.17e-10
Stmn3	21.2474	1.73789	0.249935	6.95334	3.57e-12	4.21e-10
Tspyl4	18.0631	1.69652	0.244026	6.95224	3.6e-12	4.23e-10
Gm2986	1.85244	1.21113	0.174558	6.93825	3.97e-12	4.64e-10
Gm11531	3.72979	1.44208	0.208026	6.93219	4.14e-12	4.83e-10
Hivep1	17.2132	1.76746	0.255017	6.93075	4.19e-12	4.86e-10
Ccn1	3.61947	1.29037	0.186358	6.92412	4.39e-12	5.08e-10
Ndufa5	4.68796	1.53343	0.221678	6.91738	4.6e-12	5.31e-10
Rab7	5.29798	1.47739	0.213734	6.91229	4.77e-12	5.49e-10
Rbbp4	9.64562	1.4939	0.216953	6.88583	5.75e-12	6.59e-10
Chuk	10.5171	1.35653	0.197116	6.88191	5.91e-12	6.75e-10
Kxd1	4.25259	1.33554	0.194394	6.87026	6.41e-12	7.28e-10
Smc3	30.0153	1.59725	0.232783	6.86157	6.81e-12	7.69e-10
Apba1	20.4741	1.58656	0.231387	6.85674	7.05e-12	7.93e-10
Gm5357	3.78713	1.3631	0.199078	6.84709	7.54e-12	8.46e-10
Sfpq	24.3834	1.76353	0.25789	6.8383	8.01e-12	8.94e-10
Dhcr24	9.43927	1.5589	0.22814	6.8331	8.31e-12	9.24e-10
Eno2	16.2785	1.49724	0.219163	6.83164	8.39e-12	9.31e-10
E330018M18Rik	3.30215	1.35146	0.198023	6.82474	8.81e-12	9.74e-10
Gm45262	2.85055	1.28458	0.188439	6.81694	9.3e-12	1.03e-09
Nsfl1c	7.16029	1.51109	0.222376	6.79519	1.08e-11	1.19e-09
Gabbr1	130.477	1.80527	0.26652	6.77346	1.26e-11	1.37e-09
Itpr1	57.2391	1.84988	0.27315	6.7724	1.27e-11	1.38e-09
Map1b	64.2743	1.83358	0.270798	6.77103	1.28e-11	1.39e-09
Ubc	19.249	1.6415	0.242452	6.7704	1.28e-11	1.39e-09
Sec11a	7.20573	1.47404	0.217742	6.76965	1.29e-11	1.39e-09
1700010L04Rik	2.16958	1.10983	0.16472	6.73765	1.61e-11	1.73e-09
Rpl31-ps14	2.57719	1.22801	0.182526	6.72786	1.72e-11	1.85e-09
Psmc5	9.6909	1.35526	0.20186	6.71385	1.9e-11	2.02e-09
Snrpb	4.33913	1.31507	0.196104	6.70596	2e-11	2.13e-09
BC024386	3.78557	1.35801	0.202697	6.6997	2.09e-11	2.21e-09
Rpl10a	5.04421	1.27371	0.190146	6.69858	2.1e-11	2.23e-09
Gm35256	4.35735	1.34231	0.201344	6.66672	2.62e-11	2.76e-09
A530083I20Rik	4.78085	1.27315	0.191235	6.65749	2.79e-11	2.93e-09
Gpx4	9.97481	1.50585	0.226382	6.65181	2.9e-11	3.03e-09
Rps27	11.2599	1.64861	0.248136	6.64398	3.05e-11	3.19e-09
Gm17791	2.56192	1.23181	0.185581	6.63759	3.19e-11	3.32e-09
Ndufa13	7.08316	1.35579	0.204415	6.63253	3.3e-11	3.43e-09
Vmn1r27	2.6661	1.19351	0.180309	6.61924	3.61e-11	3.74e-09
Nagk	9.73315	1.49629	0.226139	6.61666	3.67e-11	3.8e-09
Mocs2	6.75881	1.38622	0.209589	6.61397	3.74e-11	3.86e-09
Wdr33	15.3508	1.36906	0.207288	6.60464	3.98e-11	4.09e-09
Rtn3	46.5735	1.69355	0.256834	6.59397	4.28e-11	4.39e-09
Kcnq2	28.6779	1.50611	0.229075	6.57477	4.87e-11	4.98e-09
Actr2	11.4592	1.54723	0.235461	6.57108	5e-11	5.09e-09
Atp1a3	17.3299	1.37981	0.210546	6.55348	5.62e-11	5.71e-09
Marcks	10.125	1.46129	0.223243	6.54573	5.92e-11	6e-09
Chp1	24.6665	1.49794	0.229536	6.52594	6.76e-11	6.83e-09
Prodh2	2.98326	1.16641	0.179136	6.51132	7.45e-11	7.46e-09
2900064K03Rik	3.25385	1.22316	0.187865	6.51083	7.47e-11	7.47e-09
Gm5080	3.74708	1.32751	0.203942	6.50928	7.55e-11	7.52e-09
Gm43769	3.41914	1.19243	0.183311	6.50499	7.77e-11	7.72e-09
Gm11342	3.00017	1.21258	0.186424	6.5044	7.8e-11	7.73e-09
Gm7331	2.95509	1.25913	0.193614	6.50329	7.86e-11	7.77e-09
4933404G15Rik	2.42038	1.18663	0.18259	6.49889	8.09e-11	7.98e-09
Gm10032	3.10854	1.21991	0.18791	6.492	8.47e-11	8.33e-09
Vamp2	16.7875	1.78399	0.275053	6.48599	8.82e-11	8.64e-09
Gm47778	3.76426	1.35615	0.20911	6.48534	8.85e-11	8.66e-09
Eif4h	63.8304	1.82427	0.281434	6.48207	9.05e-11	8.8e-09
Gm7595	2.07206	1.14633	0.17685	6.48197	9.05e-11	8.8e-09
Gm47037	2.1673	1.14724	0.177107	6.47765	9.32e-11	9.04e-09
Atp1b1	68.0617	1.8703	0.289512	6.46019	1.05e-10	1.01e-08
Mtrex	6.29442	1.26219	0.196033	6.43863	1.21e-10	1.16e-08
Gm45548	3.32678	1.24931	0.194424	6.42571	1.31e-10	1.26e-08
Ptpn5	12.041	1.58301	0.246343	6.42604	1.31e-10	1.26e-08
Ddc	6.02484	1.34198	0.208972	6.42178	1.35e-10	1.28e-08
Klra4	2.59063	1.14443	0.178213	6.4217	1.35e-10	1.28e-08
Kat7	6.47699	1.40496	0.219241	6.40828	1.47e-10	1.4e-08
Zc3h11a	2.51088	1.09249	0.170536	6.40624	1.49e-10	1.41e-08
Epn2	3.9908	1.17304	0.183197	6.4032	1.52e-10	1.43e-08
Asb1	36.6444	1.34826	0.210678	6.39962	1.56e-10	1.46e-08
Plpp7	6.36158	1.26906	0.198324	6.3989	1.57e-10	1.47e-08
Gm48912	2.06318	1.06487	0.16667	6.3891	1.67e-10	1.56e-08
Gm19290	2.24552	1.16307	0.182072	6.38796	1.68e-10	1.57e-08
Ocrl	10.1174	1.38609	0.218354	6.3479	2.18e-10	2.03e-08
Gm49577	1.86743	1.08159	0.170578	6.34072	2.29e-10	2.12e-08
Gm40614	2.03594	1.09818	0.173228	6.33949	2.31e-10	2.13e-08
Arfip2	10.2542	1.30577	0.206154	6.33396	2.39e-10	2.2e-08
Calr	8.78152	1.5707	0.248303	6.32573	2.52e-10	2.31e-08
Gm9761	2.60698	1.19978	0.189663	6.32586	2.52e-10	2.31e-08
Gm15484	2.92758	1.13322	0.17925	6.32199	2.58e-10	2.36e-08
8030445P17Rik	3.30963	1.23481	0.195476	6.31696	2.67e-10	2.43e-08
A830082N09Rik	4.58791	1.21349	0.192371	6.30806	2.83e-10	2.56e-08
0610012G03Rik	5.5974	1.21782	0.193489	6.29401	3.09e-10	2.79e-08
S100b	3.60522	1.27215	0.202628	6.27827	3.42e-10	3.07e-08
Hint1	23.0501	1.58619	0.252747	6.27583	3.48e-10	3.11e-08
Plp1	70.1627	2.07537	0.330687	6.27593	3.48e-10	3.11e-08
Tmem192	3.82134	1.16643	0.185997	6.27124	3.58e-10	3.19e-08
Gm49184	1.95657	1.07425	0.171325	6.27025	3.6e-10	3.21e-08
Ndufb3	3.16459	1.33476	0.212907	6.2692	3.63e-10	3.22e-08
Kcnab2	6.26552	1.24874	0.199337	6.26446	3.74e-10	3.31e-08
Gm16072	4.0629	1.18764	0.189864	6.25524	3.97e-10	3.5e-08
Prtg	7.97811	1.23556	0.197736	6.24851	4.14e-10	3.65e-08
Azin1	10.3941	1.35981	0.218184	6.23241	4.59e-10	4.02e-08
Chic2	9.53189	1.2683	0.203522	6.23178	4.61e-10	4.02e-08
Gm47096	4.23133	1.28161	0.205704	6.23034	4.65e-10	4.05e-08
Tle5	12.9475	1.68295	0.270367	6.2247	4.82e-10	4.19e-08
Vmn1r174	3.40292	1.20137	0.19303	6.22371	4.86e-10	4.2e-08
mt-Co3	10.1746	1.38039	0.221811	6.22325	4.87e-10	4.21e-08
Fam120a	21.6491	1.43308	0.230339	6.22159	4.92e-10	4.24e-08
Gm43593	1.89382	1.07083	0.172235	6.21723	5.06e-10	4.35e-08
Olfr1170	2.26737	1.06128	0.170761	6.21502	5.13e-10	4.4e-08
Rnf5	2.36228	1.1136	0.179204	6.21415	5.16e-10	4.42e-08
Fbxo47	3.36439	1.16335	0.187777	6.19538	5.81e-10	4.94e-08
Gm48611	2.18022	1.00471	0.162333	6.18921	6.05e-10	5.13e-08
Gm15728	2.8933	1.12048	0.181249	6.18197	6.33e-10	5.36e-08
Gm7867	1.84878	1.03662	0.168087	6.16715	6.95e-10	5.87e-08
Kif1b	31.1527	1.40207	0.227404	6.16553	7.02e-10	5.91e-08
Cysltr2	2.71912	1.10442	0.179541	6.15133	7.68e-10	6.44e-08
Hba-a1	11.6188	1.26465	0.205579	6.15163	7.67e-10	6.44e-08
Tmtc4	8.64747	1.3001	0.211695	6.14139	8.18e-10	6.84e-08
Gm5990	1.80005	1.04553	0.170374	6.13666	8.43e-10	7.03e-08
Rpl18a	59.7412	1.24393	0.202772	6.13461	8.54e-10	7.11e-08
Cyp7b1	2.417	1.00498	0.163839	6.13398	8.57e-10	7.12e-08
Exoc4	10.8947	1.30695	0.213705	6.1157	9.61e-10	7.97e-08
Mlkl	2.27912	1.00209	0.164066	6.10785	1.01e-09	8.35e-08
Msmo1	24.7966	1.6528	0.270718	6.10524	1.03e-09	8.47e-08
NA	1.96082	1.06481	0.174423	6.10474	1.03e-09	8.47e-08
Gm9634	2.81545	1.14503	0.18782	6.09639	1.08e-09	8.89e-08
1700047L14Rik	1.90397	1.0342	0.169656	6.09584	1.09e-09	8.9e-08
Aldoa	56.3955	1.90872	0.313238	6.09351	1.1e-09	8.99e-08
Selenot	22.569	1.47908	0.242734	6.09343	1.11e-09	8.99e-08
Gm15637	2.84726	1.1242	0.184582	6.09051	1.13e-09	9.14e-08
Gm15218	2.04373	1.04958	0.172368	6.08918	1.13e-09	9.19e-08
Gm26544	2.63559	1.10098	0.180829	6.08852	1.14e-09	9.21e-08
Olfr920	4.51502	1.16379	0.191284	6.08408	1.17e-09	9.44e-08
Mbp	148.456	1.87917	0.308999	6.08147	1.19e-09	9.56e-08
Gm14791	2.70909	1.16289	0.191595	6.06949	1.28e-09	1.02e-07
Mir100hg	20.9092	1.44841	0.23869	6.06817	1.29e-09	1.03e-07
Gm20953	4.28837	1.23872	0.204292	6.0635	1.33e-09	1.06e-07
Fancd2os	2.18748	1.04953	0.1731	6.06314	1.33e-09	1.06e-07
Gm19236	4.27394	1.16279	0.191795	6.0627	1.34e-09	1.06e-07
Gm15568	1.98255	1.05556	0.174164	6.0607	1.36e-09	1.07e-07
Gm14682	2.24481	1.09704	0.181061	6.05895	1.37e-09	1.08e-07
Fabp3-ps1	1.99406	1.11028	0.183273	6.05806	1.38e-09	1.08e-07
Gm14303	3.10782	1.21488	0.200593	6.05646	1.39e-09	1.09e-07
NA	1.68849	1.01792	0.168252	6.05001	1.45e-09	1.13e-07
2410021H03Rik	2.01448	1.07052	0.177102	6.04468	1.5e-09	1.16e-07
Anxa9	2.53559	1.0602	0.175398	6.04453	1.5e-09	1.16e-07
Fbxw11	3.98763	1.10828	0.183407	6.04273	1.52e-09	1.18e-07
A730017L22Rik	3.29552	1.09558	0.181647	6.03133	1.63e-09	1.26e-07
Slx1b	17.6905	1.28456	0.213355	6.02076	1.74e-09	1.34e-07
Gm18258	1.75473	1.00324	0.16669	6.01864	1.76e-09	1.36e-07
NA	4.54611	1.27044	0.211095	6.01833	1.76e-09	1.36e-07
Gm12497	2.07898	1.06309	0.176668	6.01746	1.77e-09	1.36e-07
Gm3371	1.54308	1.01329	0.16839	6.01751	1.77e-09	1.36e-07
Mtmr10	8.55499	1.29803	0.215779	6.01558	1.79e-09	1.37e-07
1700084J12Rik	3.44907	1.14201	0.190007	6.01039	1.85e-09	1.41e-07
Gm12383	2.04762	1.0459	0.174251	6.00223	1.95e-09	1.48e-07
Cmss1	3.24333	1.0688	0.178113	6.00065	1.97e-09	1.49e-07
Hivep2	29.2385	1.23412	0.206088	5.98831	2.12e-09	1.6e-07
Gm28919	1.726	1.03889	0.173573	5.98536	2.16e-09	1.62e-07
Wdr89	5.6941	1.24302	0.2077	5.98467	2.17e-09	1.62e-07
Gm47594	4.39316	1.17951	0.197136	5.98323	2.19e-09	1.63e-07
Mapk10	42.5834	1.64407	0.274963	5.97924	2.24e-09	1.67e-07
Anks3	3.90006	1.0705	0.179106	5.97692	2.27e-09	1.69e-07
4933435F18Rik	3.36225	1.14842	0.192196	5.97526	2.3e-09	1.7e-07
Smarca2	24.2024	1.42621	0.238689	5.97517	2.3e-09	1.7e-07
Zzef1	35.8503	1.46136	0.244584	5.97486	2.3e-09	1.7e-07
Rps12	20.4334	1.5586	0.261039	5.97074	2.36e-09	1.74e-07
Gm5203	1.92032	1.06046	0.177916	5.96046	2.52e-09	1.85e-07
Tox	8.04406	1.20934	0.203006	5.95716	2.57e-09	1.88e-07
Lrrtm1	12.2774	1.56051	0.2621	5.95388	2.62e-09	1.92e-07
Epp13	3.23379	1.16719	0.196087	5.95241	2.64e-09	1.93e-07
4933401H06Rik	2.58831	1.05613	0.177467	5.95115	2.66e-09	1.94e-07
Clns1a	3.44662	1.1188	0.188215	5.94426	2.78e-09	2.02e-07
Spop	7.30457	1.23852	0.208345	5.94456	2.77e-09	2.02e-07
Sod1	25.1309	1.5557	0.261761	5.9432	2.8e-09	2.03e-07
Terf2	4.56949	1.11315	0.187456	5.9382	2.88e-09	2.08e-07
Gm37834	2.49613	1.02748	0.17316	5.9337	2.96e-09	2.13e-07
Zbtb16	4.14754	1.05968	0.179104	5.91656	3.29e-09	2.35e-07
D5Ertd579e	13.8024	1.33174	0.225162	5.91456	3.33e-09	2.37e-07
Gm14539	1.90513	1.03629	0.17521	5.91456	3.33e-09	2.37e-07
8430419K02Rik	3.06834	1.07437	0.181771	5.91056	3.41e-09	2.42e-07
Gm48266	2.61218	1.06071	0.179482	5.90985	3.42e-09	2.43e-07
Atg2b	8.76266	1.21971	0.206398	5.9095	3.43e-09	2.43e-07
Smu1	6.04424	1.20598	0.204115	5.90835	3.46e-09	2.44e-07
Fundc1	2.60771	1.07224	0.181568	5.90545	3.52e-09	2.48e-07
Sh3bgrl	3.83272	1.14226	0.193438	5.90504	3.53e-09	2.48e-07
Gm43371	3.03174	1.17377	0.198789	5.90459	3.54e-09	2.48e-07
Gm48082	2.15838	1.01336	0.17169	5.90228	3.59e-09	2.51e-07
Chn1	54.8456	1.60104	0.271412	5.89892	3.66e-09	2.56e-07
Gm49422	1.86662	1.01611	0.172255	5.89886	3.66e-09	2.56e-07
Gm7027	2.84042	1.11523	0.189204	5.89433	3.76e-09	2.62e-07
Gm13337	2.79743	1.12611	0.191301	5.88656	3.94e-09	2.74e-07
Ice2	4.46933	1.09354	0.185994	5.87943	4.12e-09	2.85e-07
Tbx3	9.02686	1.20477	0.204981	5.87745	4.17e-09	2.88e-07
H4c4	2.54072	1.07938	0.183673	5.87664	4.19e-09	2.88e-07
Gm47004	3.14432	1.12364	0.191224	5.87606	4.2e-09	2.89e-07
Slc22a17	18.2371	1.56365	0.266111	5.87595	4.2e-09	2.89e-07
Etnk1	126.321	1.57182	0.267606	5.87365	4.26e-09	2.92e-07
Hivep3	31.2242	1.46709	0.249895	5.87082	4.34e-09	2.96e-07
Elavl3	24.9964	1.58227	0.270022	5.85977	4.64e-09	3.15e-07
Gm8213	2.24923	1.10135	0.18801	5.85795	4.69e-09	3.18e-07
Hcfc1r1	2.09124	1.0352	0.176857	5.8533	4.82e-09	3.26e-07
Gm44775	4.07873	1.23947	0.211787	5.85244	4.84e-09	3.27e-07
Kifap3	9.67331	1.27315	0.217534	5.85266	4.84e-09	3.27e-07
Dync1li2	23.8555	1.43794	0.245786	5.8504	4.9e-09	3.3e-07
Zfp932	3.41057	1.17387	0.20066	5.85005	4.91e-09	3.3e-07
Abhd12	5.40938	1.22255	0.208992	5.84973	4.92e-09	3.3e-07
Son	15.2331	1.29807	0.222009	5.84694	5.01e-09	3.35e-07
mt-Tp	4.70023	1.11177	0.190204	5.84512	5.06e-09	3.38e-07
Gm3329	2.07803	1.02756	0.175901	5.84169	5.17e-09	3.45e-07
Gm21154	2.53882	1.11093	0.190193	5.84108	5.19e-09	3.46e-07
Gm7059	4.3883	1.24115	0.212604	5.83786	5.29e-09	3.52e-07
Chchd10	13.9045	1.65369	0.283296	5.83732	5.3e-09	3.52e-07
Tyro3	18.1878	1.52958	0.262044	5.83711	5.31e-09	3.52e-07
Gm8129	2.45276	1.06116	0.181859	5.83506	5.38e-09	3.56e-07
Gm45855	2.14735	1.00161	0.172462	5.80773	6.33e-09	4.17e-07
Gm43210	4.16393	1.06924	0.184333	5.80059	6.61e-09	4.34e-07
Gm43778	2.04766	1.01174	0.174532	5.79687	6.76e-09	4.43e-07
Kctd18	8.27766	1.19619	0.206373	5.79624	6.78e-09	4.44e-07
Jkamp	11.4913	1.34205	0.23201	5.78447	7.27e-09	4.73e-07
Nxpe5	4.14301	1.17607	0.203311	5.78458	7.27e-09	4.73e-07
Prrc2b	21.6152	1.44166	0.249569	5.77658	7.62e-09	4.94e-07
Prl2c5	2.65097	1.12941	0.195657	5.77238	7.82e-09	5.06e-07
Gm49035	2.54367	1.02974	0.178466	5.76995	7.93e-09	5.12e-07
Dynll2	4.60926	1.17448	0.20361	5.76831	8.01e-09	5.15e-07
Rpl9-ps2	2.29582	1.04344	0.180889	5.76837	8e-09	5.15e-07
Snu13	3.03157	1.03924	0.180166	5.76827	8.01e-09	5.15e-07
Tmprss15	4.11572	1.08602	0.188287	5.7679	8.03e-09	5.15e-07
Synj1	32.2706	1.66762	0.289252	5.76527	8.15e-09	5.22e-07
Bin3	2.7688	1.02545	0.17823	5.75354	8.74e-09	5.57e-07
Gm49737	2.22039	1.05626	0.183623	5.75233	8.8e-09	5.6e-07
Gm3509	2.90195	1.11252	0.19347	5.75032	8.91e-09	5.65e-07
Chrm2	4.51369	1.14047	0.198466	5.74645	9.11e-09	5.78e-07
Mvb12a	6.18231	1.16815	0.203353	5.74442	9.22e-09	5.83e-07
Gm48794	2.15344	1.05449	0.1837	5.74027	9.45e-09	5.96e-07
Gm13362	2.2532	1.00484	0.175166	5.73647	9.67e-09	6.08e-07
Tcf25	41.8348	1.35864	0.237004	5.73255	9.89e-09	6.21e-07
Gm44677	4.00357	1.15389	0.202018	5.71183	1.12e-08	6.99e-07
Zdhhc17	11.7188	1.34378	0.235415	5.70811	1.14e-08	7.11e-07
Vmn2r24	6.37195	1.20734	0.211543	5.70729	1.15e-08	7.14e-07
Arpp21	76.9135	1.66546	0.292175	5.7002	1.2e-08	7.43e-07
Gm37999	3.13155	1.11726	0.196034	5.69933	1.2e-08	7.45e-07
Arhgap44	16.1155	1.43093	0.251117	5.69827	1.21e-08	7.49e-07
Gm43515	3.33159	1.06381	0.186971	5.68969	1.27e-08	7.86e-07
Nsmce2	4.73254	1.16263	0.204581	5.68298	1.32e-08	8.15e-07
4931420L22Rik	2.5735	1.04746	0.184538	5.6761	1.38e-08	8.46e-07
Ctxn1	4.01568	1.02999	0.181968	5.66028	1.51e-08	9.21e-07
Gm12350	2.2558	1.03656	0.183329	5.65411	1.57e-08	9.51e-07
Tmem177	4.21054	1.11734	0.197961	5.64425	1.66e-08	1e-06
Gm48262	3.7998	1.14062	0.202231	5.6402	1.7e-08	1.02e-06
Ttyh3	11.5842	1.14814	0.203564	5.64017	1.7e-08	1.02e-06
Ddx24	18.5137	1.45584	0.258175	5.63897	1.71e-08	1.03e-06
Gm16580	2.42601	1.00596	0.178601	5.63247	1.78e-08	1.06e-06
Pdgfa	7.01626	1.1156	0.198079	5.63212	1.78e-08	1.06e-06
Dennd1b	14.2119	1.26495	0.224758	5.62805	1.82e-08	1.08e-06
Carnmt1	3.3166	1.05252	0.187168	5.62339	1.87e-08	1.11e-06
Gm4263	2.3517	1.02658	0.18276	5.61708	1.94e-08	1.15e-06
Atp5k	5.4822	1.31682	0.234499	5.61547	1.96e-08	1.15e-06
Mfap1a	2.74445	1.00984	0.180214	5.60352	2.1e-08	1.22e-06
Abhd8	16.7923	1.45098	0.259096	5.60015	2.14e-08	1.24e-06
Gm45486	4.24982	1.16388	0.208061	5.59393	2.22e-08	1.28e-06
Gm47085	2.79419	1.07178	0.19199	5.58246	2.37e-08	1.36e-06
Dhodh	6.63431	1.2245	0.219649	5.57481	2.48e-08	1.42e-06
Vmn2r11	3.40642	1.06513	0.191508	5.5618	2.67e-08	1.52e-06
Endod1	8.9503	1.39364	0.250663	5.55981	2.7e-08	1.54e-06
Gm5347	3.14028	1.10573	0.199114	5.55326	2.8e-08	1.59e-06
Cdh9	3.73012	1.05512	0.190033	5.55233	2.82e-08	1.6e-06
Slc25a21	5.44206	1.10201	0.198666	5.54703	2.91e-08	1.64e-06
Ms4a4b	5.06993	1.11298	0.200775	5.54344	2.97e-08	1.67e-06
Gm37255	2.81119	1.00207	0.180841	5.54117	3e-08	1.69e-06
Emb	9.24896	1.21946	0.220225	5.53735	3.07e-08	1.72e-06
Clmp	5.64987	1.08184	0.195387	5.53692	3.08e-08	1.73e-06
Gm43201	4.64347	1.12345	0.203103	5.53141	3.18e-08	1.77e-06
Phactr3	22.1997	1.22987	0.222335	5.5316	3.17e-08	1.77e-06
Creb5	24.3361	1.29622	0.234571	5.5259	3.28e-08	1.82e-06
Fuca2	4.40734	1.03709	0.187675	5.52597	3.28e-08	1.82e-06
Ilrun	9.60909	1.19654	0.216537	5.52578	3.28e-08	1.82e-06
Mrpl32	9.7396	1.22612	0.222018	5.52263	3.34e-08	1.85e-06
Gm42949	2.74585	1.03858	0.188504	5.5096	3.6e-08	1.98e-06
Olfr1152	5.52625	1.05591	0.192055	5.49795	3.84e-08	2.1e-06
Gm15712	2.4094	1.01667	0.185209	5.48933	4.03e-08	2.2e-06
Mettl26	7.77686	1.06139	0.193418	5.48753	4.08e-08	2.21e-06
Gm44894	2.57156	1.02087	0.186517	5.47336	4.42e-08	2.39e-06
Srp54c	2.30559	1.00426	0.183766	5.46491	4.63e-08	2.5e-06
Fbxo21	7.04258	1.19638	0.218957	5.464	4.66e-08	2.5e-06
Mttp	8.05007	1.1477	0.210813	5.44419	5.2e-08	2.77e-06
Rpl35a	13.266	1.22231	0.224516	5.44421	5.2e-08	2.77e-06
Lamp1	20.3744	1.00903	0.185484	5.44	5.33e-08	2.83e-06
Gm26831	2.88182	1.04377	0.191886	5.43954	5.34e-08	2.83e-06
Sel1l	53.8591	1.48229	0.272588	5.43784	5.39e-08	2.86e-06
Laptm4b	17.805	1.14664	0.210935	5.43597	5.45e-08	2.88e-06
Rpsa	6.18107	1.06865	0.196586	5.43604	5.45e-08	2.88e-06
Ncoa4	6.77469	1.14799	0.211618	5.4248	5.8e-08	3.04e-06
Rnf44	25.3175	1.09627	0.202158	5.42287	5.86e-08	3.06e-06
Mgat2	7.93861	1.12541	0.208008	5.41041	6.29e-08	3.28e-06
Ilvbl	22.6758	1.12384	0.207807	5.40812	6.37e-08	3.31e-06
Gm5735	2.61033	1.00324	0.185637	5.40429	6.51e-08	3.38e-06
Sec24b	5.3554	1.03913	0.19243	5.40008	6.66e-08	3.44e-06
Skp1	6.34466	1.19859	0.221984	5.39946	6.68e-08	3.45e-06
Gm6916	3.41138	1.03847	0.192465	5.39563	6.83e-08	3.51e-06
Olfr855	2.97829	1.06375	0.197289	5.39182	6.97e-08	3.57e-06
Pla2r1	8.37011	1.09518	0.203182	5.39014	7.04e-08	3.59e-06
Vmn2r76	15.2296	1.19357	0.221478	5.38913	7.08e-08	3.61e-06
2900022M07Rik	3.22122	1.0174	0.189228	5.37657	7.59e-08	3.85e-06
Scn1a	15.4891	1.28947	0.240257	5.36704	8e-08	4.05e-06
Rpl36a	22.8907	1.56833	0.29232	5.36511	8.09e-08	4.09e-06
Nckap1	16.1287	1.34002	0.249941	5.36136	8.26e-08	4.16e-06
Gm20400	2.08335	1.01065	0.188567	5.35964	8.34e-08	4.2e-06
Hmgcs1	26.1031	1.2703	0.237123	5.35713	8.46e-08	4.25e-06
Rplp2	10.6933	1.37623	0.257125	5.35237	8.68e-08	4.35e-06
A330023F24Rik	6.3742	1.06944	0.199883	5.3503	8.78e-08	4.39e-06
Ndufb8	6.2602	1.20521	0.225373	5.34762	8.91e-08	4.45e-06
1700028K03Rik	3.83363	1.06681	0.19954	5.34634	8.97e-08	4.47e-06
Rps25	11.5795	1.24007	0.232147	5.34174	9.21e-08	4.57e-06
Chga	3.25273	1.01768	0.190806	5.3336	9.63e-08	4.78e-06
Gm25514	2.82473	1.02151	0.191574	5.33219	9.7e-08	4.8e-06
Gm7337	3.48483	1.06949	0.200564	5.33241	9.69e-08	4.8e-06
Gm45223	18.6953	1.37061	0.257163	5.32973	9.84e-08	4.86e-06
Gm43886	5.90943	1.15798	0.217477	5.32463	1.01e-07	4.99e-06
Fth1	162.574	1.85882	0.349223	5.32274	1.02e-07	5.03e-06
Gm7290	2.58543	1.02028	0.192014	5.31354	1.08e-07	5.27e-06
Cntrl	7.06735	1.05376	0.198444	5.31012	1.1e-07	5.36e-06
Trbc1	2.47834	1.00656	0.189569	5.30971	1.1e-07	5.37e-06
Ddx5	27.8596	1.27768	0.240741	5.30727	1.11e-07	5.41e-06
Ttc19	6.59075	1.05642	0.199691	5.2903	1.22e-07	5.85e-06
Rpl7a	8.1286	1.27739	0.241567	5.28796	1.24e-07	5.91e-06
Vmn1r81	8.46027	1.167	0.22078	5.28577	1.25e-07	5.98e-06
Stag2	25.4941	1.24552	0.235998	5.27766	1.31e-07	6.24e-06
Slc1a3	23.0978	1.22931	0.233184	5.27184	1.35e-07	6.42e-06
Snca	22.4813	1.56725	0.297512	5.26783	1.38e-07	6.55e-06
Gm32531	2.68662	1.02156	0.194194	5.26051	1.44e-07	6.78e-06
Gm48259	2.94805	1.03751	0.197293	5.25872	1.45e-07	6.83e-06
Gm19024	4.78314	1.12406	0.21377	5.25828	1.45e-07	6.83e-06
Gm16239	3.05459	1.01173	0.192652	5.2516	1.51e-07	7.06e-06
Gm36640	5.12337	1.02539	0.195553	5.24352	1.58e-07	7.34e-06
Tmsb4x	263.126	1.74552	0.332914	5.24316	1.58e-07	7.34e-06
Atp5d	6.70415	1.19987	0.228897	5.24197	1.59e-07	7.38e-06
Gm37176	3.29726	1.00393	0.191828	5.23351	1.66e-07	7.69e-06
Olfr129	4.74435	1.09634	0.209679	5.22865	1.71e-07	7.86e-06
Rabgap1	24.3273	1.18884	0.227777	5.21929	1.8e-07	8.23e-06
Nbas	6.91693	1.00132	0.191874	5.21864	1.8e-07	8.25e-06
Stard10	11.2133	1.11324	0.213368	5.21747	1.81e-07	8.29e-06
4921514A10Rik	3.67032	1.02558	0.196914	5.20829	1.91e-07	8.69e-06
Gm36947	3.22588	1.01372	0.194718	5.20608	1.93e-07	8.78e-06
Ano10	4.84668	1.04364	0.200567	5.20344	1.96e-07	8.88e-06
Scarb2	9.76089	1.24627	0.23997	5.19345	2.06e-07	9.34e-06
Sdc2	5.35129	1.18073	0.227481	5.19046	2.1e-07	9.45e-06
Parm1	4.69383	1.03015	0.198512	5.18934	2.11e-07	9.48e-06
Gucy1a1	10.5692	1.20325	0.232269	5.18042	2.21e-07	9.88e-06
Dnmt3a	14.2593	1.14081	0.22086	5.16529	2.4e-07	1.06e-05
Il17re	8.01513	1.15601	0.223838	5.16449	2.41e-07	1.07e-05
Agk	8.19659	1.03675	0.201071	5.15617	2.52e-07	1.1e-05
NA	5.21216	1.03795	0.201869	5.14169	2.72e-07	1.18e-05
Xpr1	19.8132	1.19348	0.232558	5.13196	2.87e-07	1.24e-05
Gm4240	3.63576	1.00481	0.195849	5.13052	2.89e-07	1.25e-05
Kif21b	12.6371	1.16488	0.227253	5.12593	2.96e-07	1.27e-05
Skint5	9.21704	1.1492	0.224242	5.12482	2.98e-07	1.28e-05
Prnp	27.3191	1.14813	0.224476	5.11472	3.14e-07	1.34e-05
Gm1976	4.35408	1.02933	0.201409	5.11065	3.21e-07	1.37e-05
Khdrbs2	7.22948	1.03878	0.203362	5.10803	3.26e-07	1.38e-05
Gm43567	5.47041	1.18463	0.233221	5.07942	3.79e-07	1.58e-05
Cltc	23.8544	1.30394	0.25715	5.07072	3.96e-07	1.63e-05
Pate4	3.54775	1.04831	0.206739	5.07071	3.96e-07	1.63e-05
Gm8209	3.77345	1.05463	0.208066	5.06875	4e-07	1.65e-05
Gm37079	4.83834	1.1054	0.218139	5.0674	4.03e-07	1.66e-05
Trrap	23.3801	1.18432	0.233783	5.06589	4.06e-07	1.67e-05
Gm45251	4.21196	1.05542	0.208645	5.05844	4.23e-07	1.73e-05
Cd300ld	3.9051	1.0165	0.201127	5.05404	4.33e-07	1.76e-05
Rpl19-ps9	3.44244	1.0265	0.203185	5.05206	4.37e-07	1.77e-05
Atp5j2	15.9166	1.11517	0.221491	5.03484	4.78e-07	1.92e-05
Hus1	6.89663	1.12294	0.223828	5.01699	5.25e-07	2.08e-05
Nrgn	37.1363	1.56496	0.312103	5.01426	5.32e-07	2.11e-05
Mlf2	8.41056	1.03917	0.207394	5.01062	5.43e-07	2.14e-05
Tmem101	4.6076	1.00948	0.201609	5.0071	5.53e-07	2.17e-05
Srrd	47.252	1.46493	0.294009	4.9826	6.27e-07	2.43e-05
Cubn	12.1933	1.10682	0.222398	4.97674	6.47e-07	2.49e-05
Gm37729	3.45746	1.00041	0.201313	4.96942	6.72e-07	2.58e-05
Gpd1l	5.09109	1.0065	0.203021	4.95762	7.14e-07	2.71e-05
Rps18	17.7383	1.27778	0.257834	4.95581	7.2e-07	2.73e-05
Cdk9	10.7839	1.07796	0.217655	4.9526	7.32e-07	2.77e-05
Akap6	15.015	1.13711	0.229888	4.94636	7.56e-07	2.84e-05
Micos10	24.6956	1.32679	0.2684	4.94332	7.68e-07	2.88e-05
Zfp612	6.2213	1.01595	0.206421	4.92172	8.58e-07	3.16e-05
Grm7	10.5374	1.05929	0.215312	4.91979	8.66e-07	3.19e-05
Trappc12	31.3372	1.26784	0.257905	4.91592	8.84e-07	3.24e-05
Sfi1	18.3015	1.15688	0.235452	4.91343	8.95e-07	3.27e-05
Rpl41	4.87979	1.01565	0.206838	4.91035	9.09e-07	3.31e-05
Fyb	11.2372	1.14959	0.234234	4.90788	9.21e-07	3.34e-05
Adamts9	16.32	1.14202	0.232721	4.90726	9.24e-07	3.35e-05
Dusp22	5.74527	1.06274	0.217049	4.89632	9.76e-07	3.51e-05
NA	5.96599	1.01248	0.207049	4.89004	1.01e-06	3.62e-05
Vmn2r2	4.4975	1.00493	0.206756	4.86044	1.17e-06	4.08e-05
Gm17511	3.34064	1.00526	0.207143	4.85299	1.22e-06	4.22e-05
Npepps	13.7214	1.06622	0.221615	4.81112	1.5e-06	5.05e-05
Gm16028	5.01403	1.0099	0.210171	4.80511	1.55e-06	5.18e-05
Syngr3	9.13334	1.05666	0.220575	4.79047	1.66e-06	5.55e-05
Gpr141	5.93652	1.03649	0.217185	4.77237	1.82e-06	5.98e-05
Map7d2	10.0451	1.19942	0.251324	4.7724	1.82e-06	5.98e-05
Ccnt1	20.1234	1.1594	0.243328	4.76474	1.89e-06	6.19e-05
Gm35857	3.47772	1.00852	0.212609	4.74355	2.1e-06	6.78e-05
Sparcl1	40.6628	1.45838	0.307635	4.7406	2.13e-06	6.88e-05
Gm43766	6.30719	1.03144	0.217684	4.73824	2.16e-06	6.95e-05
Rps7	29.7726	1.37507	0.291836	4.71181	2.46e-06	7.77e-05
Cabin1	14.9845	1.03393	0.221974	4.65791	3.19e-06	9.81e-05
Scoc	11.2271	1.21355	0.260637	4.65609	3.22e-06	9.87e-05
Pitpnm3	10.696	1.05102	0.225861	4.65339	3.27e-06	9.97e-05
Bmerb1	9.81943	1.18822	0.256078	4.64008	3.48e-06	0.000105042
Sf3b6	10.6917	1.08401	0.234013	4.63226	3.62e-06	0.000108104
Rpl12	10.4014	1.11743	0.242418	4.60949	4.04e-06	0.000118978
Pcnp	33.4279	1.12431	0.244056	4.60676	4.09e-06	0.000120066
Myef2	33.2319	1.03083	0.223876	4.60448	4.13e-06	0.000121096
Gm30146	5.24074	1.01346	0.220549	4.59518	4.32e-06	0.000125611
Trim9	23.5329	1.03454	0.227002	4.55742	5.18e-06	0.000145563
Mkln1	45.8818	1.21353	0.266577	4.55226	5.31e-06	0.000148609
Nsg2	14.0582	1.08935	0.241112	4.518	6.24e-06	0.000169581
Gm40841	7.38088	1.05159	0.233758	4.49861	6.84e-06	0.000183606
Kif5a	56.4692	1.28506	0.28601	4.49307	7.02e-06	0.000188037
Itm2b	66.1476	1.50051	0.334192	4.48995	7.12e-06	0.000190391
Rpl26	24.2988	1.3047	0.291107	4.48188	7.4e-06	0.000196294
Nipal1	7.91774	1.00819	0.225282	4.47522	7.63e-06	0.000201043
Ngef	18.1215	1.1773	0.26358	4.46657	7.95e-06	0.000207391
Ywhae	43.1445	1.4046	0.316328	4.44032	8.98e-06	0.000230407
Hjurp	11.4402	1.00536	0.226653	4.43567	9.18e-06	0.000234774
Rhoa	16.7159	1.05343	0.237872	4.42858	9.49e-06	0.000240433
Tubb2a	24.2036	1.4581	0.331158	4.40305	1.07e-05	0.000264297
9330162G02Rik	54.2767	1.1229	0.255523	4.39453	1.11e-05	0.000271916
Rpl5	28.2143	1.2618	0.289026	4.3657	1.27e-05	0.000302747
Gm10925	20.4198	1.07721	0.248134	4.34123	1.42e-05	0.000330357
Purb	77.8922	1.33775	0.308242	4.33994	1.43e-05	0.000331639
Aak1	41.7793	1.07156	0.247869	4.32309	1.54e-05	0.000352854
Kcnj10	11.9723	1.05568	0.246775	4.27792	1.89e-05	0.000417382
Kif5c	95.3951	1.36521	0.320362	4.26146	2.03e-05	0.000444752
Fkbp3	13.3083	1.00674	0.237983	4.23031	2.33e-05	0.000495293
Pfn2	43.2377	1.29757	0.310626	4.17726	2.95e-05	0.000603917
Snf8	56.7742	1.01721	0.246178	4.13201	3.6e-05	0.000711651
Arpc2	72.4644	1.22572	0.29809	4.11191	3.92e-05	0.000762439
Rgs4	15.0607	1.05956	0.258314	4.10185	4.1e-05	0.00079128
Gpm6b	74.6546	1.13862	0.280787	4.05509	5.01e-05	0.000923876
Tpi1	11.67	1.03944	0.259142	4.01107	6.04e-05	0.00107509
Nsf	65.9918	1.29681	0.32408	4.00151	6.29e-05	0.00111345
Cox6c	42.1434	1.29326	0.336201	3.84667	0.000119732	0.00188125
Celf4	61.2573	1.08492	0.28413	3.8184	0.000134318	0.00205535
Rpl10	20.8763	1.06057	0.282115	3.75936	0.00017035	0.00247895
Atp6v1b2	83.71	1.19046	0.316801	3.75776	0.000171442	0.00249235
Slc25a3	45.4844	1.0545	0.287391	3.66921	0.000243303	0.00330334
Resf1	66.7214	1.07103	0.292143	3.66611	0.000246271	0.00332873
Tuba1b	26.9338	1.09776	0.306413	3.58261	0.00034018	0.00429482
Sptbn1	69.1921	1.07583	0.301322	3.57037	0.000356478	0.0044542
Ttc3	149.353	1.06106	0.297485	3.56677	0.000361411	0.00449945
Rpl13	19.3249	1.00269	0.286173	3.50379	0.000458679	0.00537401
Cox5a	38.6164	1.12014	0.337008	3.32377	0.000888099	0.00900302
Olfm1	70.7871	1.10338	0.333336	3.31012	0.000932567	0.00931876
mt-Cytb	1217.74	1.09167	0.345724	3.15763	0.00159059	0.0138276
Calm2	197.346	1.03386	0.369579	2.79739	0.00515175	0.0328976

## Sheet: 3B. Underexpressed
external_gene_name	baseMean	log2FoldChange	lfcSE	stat	pvalue	padj
Ddx17	160.927	-4.867	0.351674	-13.8395	1.47e-43	2.55e-40
Bbln	20.9043	-3.62878	0.300998	-12.0558	1.81e-33	1.37e-30
Necab1	73.385	-3.65837	0.305666	-11.9685	5.2e-33	3.71e-30
Gm11942	20.7364	-3.54392	0.306002	-11.5814	5.12e-31	3.11e-28
Neurod6	29.2013	-3.73169	0.3236	-11.5318	9.12e-31	5.44e-28
Lamtor5	20.7133	-3.43764	0.29915	-11.4914	1.46e-30	8.29e-28
Smim15	129.08	-3.49459	0.311557	-11.2165	3.38e-29	1.73e-26
Tmem181b-ps	32.4633	-3.20998	0.30995	-10.3564	3.91e-25	1.6e-22
Parva	22.3743	-2.98164	0.290674	-10.2577	1.09e-24	4.26e-22
Cadm2	246.716	-3.75311	0.368661	-10.1804	2.43e-24	9e-22
Gm15347	9.76285	-2.61042	0.2597	-10.0517	9.03e-24	3.16e-21
Kcnj3	71.6762	-2.83075	0.288739	-9.80384	1.08e-22	3.55e-20
Mapk8	58.9821	-3.03032	0.313536	-9.66497	4.25e-22	1.29e-19
Rpl7	217.443	-2.59118	0.281173	-9.2156	3.1e-20	7.98e-18
Tardbp	89.1005	-2.60877	0.285517	-9.13698	6.42e-20	1.6e-17
Sp3	32.7355	-2.78314	0.308196	-9.03042	1.71e-19	4.09e-17
Kctd17	11.3813	-2.49781	0.280344	-8.90982	5.11e-19	1.15e-16
Gria2	159.993	-2.75705	0.313439	-8.79614	1.42e-18	3.1e-16
Tusc2	21.875	-2.4318	0.276906	-8.78202	1.61e-18	3.48e-16
Eea1	35.6381	-2.54727	0.291636	-8.73442	2.45e-18	5.21e-16
Pgbd5	17.4856	-2.40183	0.277348	-8.66001	4.72e-18	9.8e-16
Strbp	91.0159	-2.68151	0.312	-8.59456	8.36e-18	1.69e-15
Atl1	39.4077	-2.24186	0.265238	-8.45224	2.86e-17	5.64e-15
Chic1	10.6962	-1.96091	0.232849	-8.42136	3.72e-17	7.16e-15
Plaat1	44.815	-2.6503	0.318475	-8.32183	8.66e-17	1.61e-14
Hpca	14.0256	-2.28233	0.278403	-8.19794	2.45e-16	4.49e-14
Eef1b2	37.2455	-2.20369	0.26915	-8.18757	2.67e-16	4.87e-14
Baiap2	19.6855	-2.19221	0.275165	-7.96691	1.63e-15	2.79e-13
Schip1	6.78079	-1.94799	0.246718	-7.89559	2.89e-15	4.82e-13
Napa	9.36233	-2.09057	0.265427	-7.87625	3.37e-15	5.5e-13
Sucla2	13.3052	-2.07148	0.265451	-7.80362	6.02e-15	9.43e-13
Rasl10b	7.46079	-1.92632	0.253979	-7.58456	3.34e-14	4.99e-12
Tomm70a	226.862	-2.839	0.375965	-7.55122	4.31e-14	6.4e-12
Cript	28.4663	-1.97369	0.263451	-7.49168	6.8e-14	9.93e-12
Avpr1a	8.00681	-1.60756	0.217977	-7.37491	1.64e-13	2.32e-11
Cyfip2	103.607	-2.50478	0.341866	-7.32678	2.36e-13	3.29e-11
Jak1	20.7755	-1.90888	0.264343	-7.22121	5.15e-13	6.91e-11
Atoh7	8.65934	-1.65759	0.233525	-7.09812	1.26e-12	1.61e-10
Pdcl	7.76928	-1.70025	0.240066	-7.08245	1.42e-12	1.79e-10
Tmx2	3.796	-1.63989	0.233254	-7.03048	2.06e-12	2.54e-10
AI413582	3.82129	-1.5763	0.224284	-7.02816	2.09e-12	2.56e-10
Phactr1	24.4521	-1.92116	0.276162	-6.95666	3.48e-12	4.14e-10
Gm36236	6.22927	-1.50177	0.21636	-6.94111	3.89e-12	4.56e-10
Atp6v1f	4.66105	-1.63323	0.237471	-6.87761	6.09e-12	6.94e-10
4930562C15Rik	15.5899	-1.5159	0.22079	-6.8658	6.61e-12	7.49e-10
Abhd17a	20.838	-1.87529	0.274173	-6.8398	7.93e-12	8.88e-10
Socs5	7.17103	-1.40547	0.207244	-6.78172	1.19e-11	1.3e-09
Gm43341	7.24802	-1.65391	0.245862	-6.72698	1.73e-11	1.85e-09
Gnai1	24.9807	-1.62712	0.249378	-6.52473	6.81e-11	6.86e-09
Selenos	10.8152	-1.69961	0.260788	-6.51721	7.16e-11	7.2e-09
Mff	41.8153	-1.97395	0.307184	-6.42594	1.31e-10	1.26e-08
Hipk2	14.8298	-1.64789	0.257341	-6.40351	1.52e-10	1.43e-08
Dync1i1	54.5369	-2.01486	0.316048	-6.37519	1.83e-10	1.7e-08
Wwp1	11.6155	-1.53292	0.242521	-6.32078	2.6e-10	2.37e-08
Camk2n1	199.239	-2.41156	0.382111	-6.31114	2.77e-10	2.51e-08
6430548M08Rik	16.7195	-1.59435	0.253473	-6.29004	3.17e-10	2.86e-08
Ddhd1	54.0471	-1.71874	0.275306	-6.24302	4.29e-10	3.77e-08
Gm4789	4.98287	-1.26403	0.202574	-6.23985	4.38e-10	3.84e-08
1810062O18Rik	6.64877	-1.38637	0.223415	-6.20535	5.46e-10	4.66e-08
Wnt7b	8.12623	-1.3262	0.213827	-6.20224	5.57e-10	4.74e-08
Hsbp1	5.116	-1.2729	0.208715	-6.09873	1.07e-09	8.78e-08
G3bp2	51.2313	-1.7574	0.288865	-6.08383	1.17e-09	9.44e-08
Eif3g	4.70787	-1.30461	0.214822	-6.07299	1.26e-09	1.01e-07
Gm48092	3.64547	-1.27094	0.209298	-6.0724	1.26e-09	1.01e-07
Cd248	7.14764	-1.38498	0.228875	-6.05125	1.44e-09	1.12e-07
Frmd8	21.4762	-1.4835	0.247673	-5.98976	2.1e-09	1.59e-07
Gdi1	37.8968	-1.97184	0.329338	-5.98728	2.13e-09	1.61e-07
Zar1-ps	6.2456	-1.26946	0.21207	-5.98605	2.15e-09	1.62e-07
Pak1	17.9782	-1.65612	0.279312	-5.92928	3.04e-09	2.19e-07
Nap1l1	81.7086	-1.82075	0.307824	-5.91492	3.32e-09	2.37e-07
H2ac5-ps	11.5563	-1.40246	0.238479	-5.88084	4.08e-09	2.83e-07
Olfr784	2.4992	-1.18572	0.203453	-5.82796	5.61e-09	3.7e-07
Kcns1	7.30032	-1.2158	0.208933	-5.8191	5.92e-09	3.9e-07
Scrn3	6.80012	-1.35748	0.236835	-5.73175	9.94e-09	6.23e-07
Gm47065	2.35672	-1.11382	0.19456	-5.72483	1.04e-08	6.48e-07
9130221H12Rik	3.21853	-1.14947	0.203412	-5.65094	1.6e-08	9.67e-07
Lancl1	18.1226	-1.47752	0.262479	-5.6291	1.81e-08	1.08e-06
Nedd8	9.84625	-1.43371	0.254795	-5.62694	1.83e-08	1.09e-06
Gm43100	3.27646	-1.13879	0.202444	-5.62522	1.85e-08	1.1e-06
ENSMUSG00000097913	1.97266	-1.10818	0.197325	-5.61599	1.95e-08	1.15e-06
Camta1	23.5454	-1.40754	0.250684	-5.61479	1.97e-08	1.16e-06
Vmp1	34.2156	-1.47695	0.263298	-5.60944	2.03e-08	1.19e-06
Syn2	20.1228	-1.45068	0.259159	-5.59764	2.17e-08	1.26e-06
Gm5995	2.89346	-1.17485	0.211025	-5.56736	2.59e-08	1.48e-06
Fundc2	3.84973	-1.21589	0.220298	-5.51928	3.4e-08	1.88e-06
Dbpht2	18.9878	-1.32999	0.240978	-5.51914	3.41e-08	1.88e-06
Cdk7	8.00801	-1.32939	0.241324	-5.50873	3.61e-08	1.99e-06
Impact	11.0925	-1.41912	0.258394	-5.49206	3.97e-08	2.17e-06
Calm1	261.12	-2.01248	0.367485	-5.47634	4.34e-08	2.35e-06
Zfp91	76.855	-1.57001	0.288245	-5.44678	5.13e-08	2.74e-06
Ano4	27.8898	-1.36932	0.251426	-5.4462	5.15e-08	2.75e-06
Fabp5	5.66365	-1.06577	0.196324	-5.42864	5.68e-08	2.99e-06
Acvr2a	9.30559	-1.32912	0.246065	-5.40151	6.61e-08	3.42e-06
A630081D01Rik	2.49809	-1.07196	0.198479	-5.40089	6.63e-08	3.43e-06
Ihh	4.55215	-1.04883	0.195145	-5.3746	7.68e-08	3.89e-06
Cacnb4	90.4713	-1.4716	0.275332	-5.34482	9.05e-08	4.5e-06
Cdk19	13.6422	-1.2706	0.239372	-5.30807	1.11e-07	5.4e-06
Ccdc85b	19.2193	-1.3006	0.245041	-5.3077	1.11e-07	5.41e-06
Fndc10	4.00474	-1.04399	0.196718	-5.30704	1.11e-07	5.41e-06
Gm26558	7.22309	-1.25902	0.23742	-5.30294	1.14e-07	5.51e-06
Gm17835	2.4138	-1.09216	0.206228	-5.29589	1.18e-07	5.69e-06
Nxpe1-ps	2.83034	-1.06799	0.202407	-5.27643	1.32e-07	6.27e-06
Tmem9b	69.1054	-1.47598	0.281422	-5.24472	1.57e-07	7.3e-06
Enpp4	6.35073	-1.03525	0.199747	-5.18281	2.19e-07	9.78e-06
Sort1	18.7885	-1.33914	0.259526	-5.15995	2.47e-07	1.09e-05
Stk25	8.35461	-1.11949	0.217349	-5.15065	2.6e-07	1.13e-05
Gorasp2	10.4905	-1.17303	0.227787	-5.1497	2.61e-07	1.14e-05
Phyhipl	14.8429	-1.22163	0.237253	-5.14907	2.62e-07	1.14e-05
Gm4734	4.34476	-1.23583	0.240782	-5.13255	2.86e-07	1.24e-05
Gm37238	3.86497	-1.16886	0.227915	-5.12847	2.92e-07	1.26e-05
Gm8162	4.2348	-1.15302	0.226526	-5.08999	3.58e-07	1.5e-05
Rps23	18.1268	-1.51931	0.298796	-5.08478	3.68e-07	1.54e-05
Cdc42se2	5.56438	-1.06321	0.209541	-5.07401	3.9e-07	1.62e-05
Gm5292	2.73771	-1.03775	0.205277	-5.05534	4.3e-07	1.75e-05
Celf2	73.8258	-1.42983	0.28325	-5.04793	4.47e-07	1.81e-05
Lztr1	7.8115	-1.19694	0.237424	-5.04134	4.62e-07	1.86e-05
Tlk1	66.3122	-1.23643	0.246192	-5.02221	5.11e-07	2.03e-05
Tsg101	18.622	-1.38947	0.277333	-5.01011	5.44e-07	2.15e-05
Sh3glb2	7.97122	-1.09036	0.219924	-4.95789	7.13e-07	2.71e-05
Gm43138	2.4103	-1.01462	0.205407	-4.93958	7.83e-07	2.93e-05
Atp5e	4.956	-1.05274	0.213416	-4.93282	8.11e-07	3.01e-05
Spag4	8.51462	-1.08291	0.222262	-4.87224	1.1e-06	3.9e-05
Rpl7-ps7	14.7529	-1.15324	0.237937	-4.84683	1.25e-06	4.33e-05
Chaf1a	12.1524	-1.13446	0.234689	-4.83388	1.34e-06	4.56e-05
Cct4	45.5831	-1.0754	0.224497	-4.79027	1.67e-06	5.55e-05
Sema3f	11.2191	-1.06687	0.222741	-4.78974	1.67e-06	5.56e-05
Reep5	21.7161	-1.26142	0.264308	-4.77252	1.82e-06	5.98e-05
Cenpc1	14.8214	-1.18778	0.250769	-4.73654	2.17e-06	6.99e-05
Clcn4	12.9221	-1.16641	0.246664	-4.72876	2.26e-06	7.23e-05
Gm6085	4.6556	-1.008	0.215295	-4.68194	2.84e-06	8.85e-05
Zbtb18	27.4605	-1.4288	0.305766	-4.67287	2.97e-06	9.19e-05
Thoc2l	6.26935	-1.06837	0.228722	-4.67102	3e-06	9.26e-05
Zfp131	14.3054	-1.2135	0.261227	-4.64538	3.39e-06	0.00010289
Becn1	41.9591	-1.17316	0.252789	-4.64088	3.47e-06	0.00010472
2310057M21Rik	9.11457	-1.05992	0.22864	-4.63577	3.56e-06	0.00010672
Gnl3l	12.9574	-1.16246	0.250865	-4.6338	3.59e-06	0.00010764
Idh3a	20.8863	-1.24199	0.270624	-4.58936	4.45e-06	0.00012845
Limch1	10.9634	-1.03519	0.226187	-4.57668	4.72e-06	0.00013519
Psap	10.3605	-1.21636	0.266269	-4.56815	4.92e-06	0.00013993
1700039I01Rik	4.93098	-1.03111	0.227628	-4.52983	5.9e-06	0.00016181
Cic	12.2074	-1.03987	0.230648	-4.50846	6.53e-06	0.0001762
Gm13456	4.69361	-1.0433	0.235677	-4.42681	9.56e-06	0.00024107
Rpl23a	15.6686	-1.25395	0.284894	-4.40145	1.08e-05	0.0002657
Tomm34	6.22061	-1.02541	0.233161	-4.39786	1.09e-05	0.00026941
Pcyt2	11.3355	-1.12349	0.256794	-4.37508	1.21e-05	0.00029318
Gpr22	15.6114	-1.10181	0.265011	-4.15759	3.22e-05	0.00064703
Rora	22.7802	-1.00809	0.260704	-3.86682	0.00011026	0.00176445
Ppp3ca	177.931	-1.32818	0.351417	-3.7795	0.00015715	0.00232637
Rasgef1a	12.7368	-1.01453	0.279961	-3.62381	0.00029029	0.00381044
Srsf7	54.5401	-1.10865	0.319582	-3.46905	0.0005223	0.00593559
Cox7b	39.2123	-1.22714	0.353755	-3.4689	0.0005226	0.00593649
