# Supplementary material for: Probing regenerative heterogeneity of corticospinal neurons with scRNA-Seq
Source: Research Square preprint supplement (doi:10.21203/rs.3.rs-2588274/v1), 2023-02-21
Supplement: Supplementary file 3 [file 5f2787036014403727d15886.xlsx]

## Sheet: SupplementalTable4
Upstream Regulator	Expr Fold Change	Predicted Activation State	Activation z-score	p-value of overlap	Target Molecules in Dataset	Mechanistic Network
RICTOR		Inhibited	-5.942	1.58e-33	Atp5e,ATP5F1A,ATP5F1C,ATP5F1D,ATP5MC3,ATP5MF,ATP5PB,ATP6V0B,ATP6V0E2,ATP6V1A,ATP6V1B2,ATP6V1E1,ATP6V1F,ATP6V1G1,COX4I1,COX5A,Cox6c,COX7B,Cox7c,FABP5,NDUFA5,NDUFB10,NDUFB3,NDUFB8,NDUFB9,NDUFC1,NDUFV1,NDUFV2,NIPAL1,PAK1,PSMA3,PSMB1,PSMC2,PSMC5,RPL10,RPL10A,RPL12,RPL14,RPL17,RPL21,Rpl23a,RPL26,RPL28,RPL35A,RPL38,RPL4,RPL41,RPL7,RPL7A,RPLP2,RPS11,RPS13,RPS18,RPS2,RPS23,RPS29,RPS3,RPS5,RPSA,UQCRFS1,UQ…
MLXIPL		Activated	5.183	2.06e-24	ACLY,RPL10,RPL10A,RPL12,RPL13,RPL14,RPL17,RPL18A,RPL21,Rpl22l1,Rpl23a,RPL26,RPL28,RPL35A,Rpl36a,RPL38,RPL4,RPL41,RPL5,RPL7,RPL7A,RPLP2,RPS11,RPS12,RPS13,RPS14,RPS15A,RPS16,RPS18,RPS2,RPS23,RPS25,Rps27/Rps27rt,RPS29,RPS3,RPS5,RPS7,RPSA
MYC		Activated	5.025	1.07e-21	ALDOA,CDK7,CNP,COMMD3-BMI1,CTNNB1,GPI,LDHB,MBP,RBBP4,RCAN1,RPL10,RPL10A,RPL12,RPL13,RPL14,RPL17,RPL18A,RPL21,Rpl22l1,Rpl23a,RPL26,RPL28,RPL35A,Rpl36a,RPL38,RPL4,RPL41,RPL5,RPL7,RPL7A,RPLP2,RPS11,RPS12,RPS13,RPS14,RPS15A,RPS16,RPS18,RPS2,RPS23,RPS25,Rps27/Rps27rt,RPS29,RPS3,RPS5,RPS7,RPSA,TPI1
TLE3				4.44e-11	Atp5e,ATP5F1A,ATP5F1C,ATP5F1D,Atp5k,ATP5MC3,ATP5MF,ATP5PB,NDUFA13,NDUFA5,NDUFAF7,NDUFB10,NDUFB3,NDUFB9,NDUFC1,NDUFV1,NDUFV2,UQCRFS1,UQCRQ
ADORA2A		Activated	2.683	2.36e-10	ALDOC,ATP1A3,ATP2A2,Atp5e,ATP6V1B2,CD81,CKB,G3BP2,GDI1,GPI,HBA1/HBA2,HPCA,KIF5A,NAPA,P4HB,PPP3R1,PRKAR1A,RAB6A,SPTBN1,TUBB2A
POLG				7.34e-09	BECN1,EEF1B2,RPL13,RPL14,Rpl36a,RPL5,RPL7,RPS16,RPS25,RPS5,TPT1
PRKCG				1.74e-08	ATP5F1A,ATP5F1D,ATP5MC3,ATP5MF,COX4I1,COX5A,MAP1B,NDUFA13,NDUFA5,NDUFB3,NDUFB8,NDUFB9,UQCRQ
TP53			0.411	4.44e-08	ACLY,ALDOA,ALDOC,APOE,ARHGEF4,ATG2B,Atp5e,ATP5F1A,ATP5F1C,Atp5k,ATP5MC3,ATP5PB,CAMK2N1,CISD1,CKB,CLTC,COQ2,COX5A,CTNNB1,DDX5,DHCR24,DKK3,DNMT3A,ENO2,FABP5,FAM120A,FKBP1A,FTH1,GLUL,GNAI1,GPD1L,GPM6A,GPM6B,KPNB1,LAMP1,LDHB,MRPL18,NPEPPS,P4HB,PAK1,PARVA,PCDH7,PDGFA,PDP1,PLAAT1,PLAAT3,PRNP,PSAP,PTGDS,RAN,RBBP4,RHOA,RPL10,RPL12,RPL5,RPL7,RPS12,RPS16,RPS18,RPS3,RPS5,RPSA,RYR2,SOD1,STMN1,SUCLA2,TBX3,Tms…
HTT				1.07e-07	ANTKMT,AP1S1,ATP2A2,ATP5MF,ATP6V0E2,BAIAP2,CX3CL1,CYFIP2,DKK3,GPI,HPCA,ITPR1,KCNQ2,KCTD17,LDHB,MLF2,NGEF,PPP3CA,PTPN5,RGS4,TPI1
HBA1/HBA2	1.265	Activated	3.162	1.12e-06	ATP5F1C,ATP5MF,Cox6c,NDUFA13,NDUFA5,NDUFB8,NDUFB9,NDUFC1,NDUFV1,NDUFV2
NRF1			1.89	1.33e-06	ATP1A1,ATP1B1,COX4I1,COX5A,Cox6c,COX7B,Cox7c,FTH1
KDM5A		Inhibited	-3	1.51e-06	ATP1A1,ATP1B1,ATP5F1A,Atp5k,ATP6V1F,COX4I1,GHITM,HSBP1,MDH1,NDUFA13,NDUFA5,NDUFB10,NDUFB8,NDUFV1,UQCRFS1,UQCRQ
STK11		Activated	2.224	4.51e-06	ALDOA,Atp5e,ATP5F1C,ATP5F1D,Atp5k,ATP5MC3,ATP5MF,ATP6V1F,CHGB,COX5A,Cox7c,CTNNB1,GPI,KCNQ2,NDUFA13,NDUFB9,NDUFV1,TPI1,UQCRQ
CPT1B		Inhibited	-3.174	8.27e-06	ATP2A2,Atp5e,ATP5F1A,ATP5F1C,Atp5k,Calm1 (includes others),COX4I1,COX5A,Cox6c,COX7B,MAPK8,NDUFA5,NDUFB10,NDUFB3,NDUFB9,NDUFC1,NDUFV1,NDUFV2,PRKAR1A,UQCRFS1,UQCRQ
MHC II				9.78e-06	DDX5,FTH1,HBA1/HBA2,HBB,RPL38,RPL7,RPS2,RPS29,TPT1
MYCL			1.63	1.28e-05	Atp5e,ATP5F1D,CCNT1,CDK7,COX7B,PTBP2,RPL10A,RPL12,RPL13,RPL17,SLC25A5,SNU13
MTOR			-0.298	1.44e-05	ATP2A2,ATP5PB,BEX1,CLTC,CNP,COX4I1,FABP5,HBA1/HBA2,LDHB,MBP,MDH1,PLP1,RHOA,RPL12,RPS11,RPS18,SOD1,TPPP
FMN2			1.342	2.64e-05	Atp5e,ATP5F1D,ATP5MC3,NDUFA5,UQCRQ
HNRNPH1				5.25e-05	ATP5F1A,ATP5PB,COX5A,CYFIP2,NDUFB10,NDUFB3,NDUFV1,SH3GLB2
Calmodulin			0	6.3e-05	ARPC5,Calm1 (includes others),CTXN1,LRRTM1,NECAB1,NEUROD6,NSF,VAMP1
NFE2L2		Activated	3.31	0.000126	ALDOA,APPBP2,ATP1A1,Calm1 (includes others),CCT3,CHGB,DYNLL1,EIF3G,ERP29,FTH1,GABRA1,HACD3,HPCA,MAPK10,MORF4L2,MSMO1,NCKAP1,NGEF,PFN2,PRDX1,PSMB1,RAN,RPS16,SCG2,SOD1,SYN2,TPI1
FMR1			-1.651	0.000129	ALDOA,ATP5IF1,ATP6V1E1,CACNB4,CELF4,CEND1,CTNNB1,DNM1,GABRA1,MAP1B,RPSA,SLC1A2,SPARCL1,UQCRFS1,UQCRQ
SMYD1				0.000227	ATP5F1A,IDH3A,NDUFA13,NDUFA5,NDUFV1,TPI1,UBC,UQCRFS1
PITX2			0.7	0.000231	ATP1A1,ATP1B1,GPX4,NDUFA13,NDUFB3,NDUFB8,NDUFC1,SOD1,TBX3,UQCRQ
NFASC			1.342	0.000241	DYNC1LI2,DYNLRB1,KIF1B,KIF5A,KIF5C
Hbb-b1		Activated	3.162	0.000264	ATP5F1C,ATP5MF,Cox6c,FTH1,NDUFA13,NDUFA5,NDUFB8,NDUFB9,NDUFC1,NDUFV1,NDUFV2
FAAH			-1.633	0.000269	RPL17,RPL5,RPL7,RPS18,RPS2,SLC22A17
PSEN1			-1.29	0.00033	APOE,ATP2A2,CTNNB1,GAS5,GNB1,IMPACT,KCNAB2,Klra7 (includes others),LRP1B,RYR2,SLC38A2,SNCA,SYT13,UBC
MKNK1		Activated	2.496	0.000618	ACOT7,ATP1A3,CCN1,CELF4,CPLX2,GNAI1,GRM7,KIF1B,KIF21B,KIF5A,MAP1B,SPARCL1,SYN2,TTC3,VAMP2
IGF1R		Activated	2.828	0.000625	ACP1,ALDOA,ATP5F1A,ATP5F1D,ATP5MC3,ATP5MF,COX4I1,FTH1,IVNS1ABP,NDUFB9,NDUFV2,PRKAR1A,RPL10A,RPL35A,RPL7,S100A4,SCG2,SMU1
Esrra			0.302	0.000753	ALDOA,ALDOC,ATP1A1,ATP5MC3,ATP5MF,ATP5PB,COX5A,Cox7c,ENO2,IDH3A,NDUFA5
KCNJ6				0.00111	KCNJ10,KCNJ3
NR4A1		Inhibited	-2.887	0.00112	ACLY,ATP5F1A,ATP5MC3,CTNNB1,ENO2,GPI,IDH3A,MAPK8,MDH1,NDUFB3,PEBP1,PTGDS,STARD10,SUCLA2,UQCRFS1,UQCRQ
LDHB	2.317			0.00117	ATP5F1A,COX4I1,COX5A
HSPA5				0.00117	MBP,P4HB,PLP1
miR-9-5p (and other miRNAs w/seed CUUUGGU)			-1.134	0.00127	ALDOC,Atp5e,ATP5F1C,Atp5k,COX7B,NDUFB9,NDUFC1
DNMT3B			-1.667	0.00135	ATP2A2,GRK3,GUCY1A1,PLAAT3,PRNP,RCAN1,RGS4,RYR2,SLC8A1
PSEN2			-0.469	0.00147	ATP2A2,CTNNB1,GAS5,GNB1,IMPACT,KCNAB2,Klra7 (includes others),SLC38A2,UBC
QKI			0.734	0.0016	CHGB,CLTC,CTNNB1,GPM6A,GPM6B,LAMP1,NSG2
miR-204-5p (and other miRNAs w/seed UCCCUUU)			-1.633	0.00171	ACVR2A,ATF4,CHRM2,GNB1,ITPR1,VAMP2
CPE				0.00177	CCK,CHGA,CHGB,PCSK2,SCG2
YWHAG				0.00182	CCT6A,GPI,NAPA
MYOC			1.982	0.00206	CNP,MBP,PLP1,S100B
ESR1		Activated	2.425	0.00206	Atp5e,CCDC85B,CCN1,CYP7B1,ELP3,GRIA2,GUCY1A1,HBA1/HBA2,NDUFB10,PTGDS,RBBP4,RPL18A,Rpl36a,RPL38,RPL41,Tmsb4x (includes others),UQCRQ
DMD				0.00236	APLP2,ARPP21,CAMTA1,CCT6A,CYFIP2,FTH1,Marcks,NDRG2,PLPP3,SCHIP1,SORT1,STARD10,SUSD4,Tmsb4x (includes others),TPI1,TRIM44
TCOF1				0.00244	ACVR2A,AZIN1,CNBP,HNRNPDL,MFAP1,Nptn,STMN3,TERF2
INSR		Activated	3.162	0.00248	ATP1A1,ATP1B1,ATP2A2,ATP5F1A,ATP5F1D,ATP5MC3,ATP5MF,Calm1 (includes others),COX4I1,HMGCS1,IDH3A,MSMO1,NDUFB8,NDUFB9,NDUFV2,RAB7A,RPL5,RPL7A,RPS16,SLC25A3,SLC25A5,SUCLA2,YEATS4
mir-204		Activated	2.236	0.00252	ACVR2A,ATF4,CHRM2,GNB1,ITPR1,VAMP2
TFEB			1.98	0.00257	ATP6V0B,ATP6V1A,ATP6V1B2,LAMP1
IREB2			0.152	0.00257	FTH1,LDHB,PFN2,UQCRFS1
PLCG1				0.00266	ALDOC,CTNNB1,ENO2
SLC18A2				0.00266	DYNLL1,PSAP,SNCA
BDNF			1.172	0.00284	ARPP21,ATP2A2,CHGA,HIVEP1,MBP,PLP1,REEP5,RGS4,SYN2,Tmsb4x (includes others)
TSC2			-1.921	0.00284	ATP6V0B,ATP6V1A,ATP6V1B2,ATP6V1G1,BEX1,CTNNB1,LDHB,PSMB1,SOCS5	10 (2)
TSC1			-1.845	0.00306	ATP6V0B,ATP6V1A,ATP6V1B2,BEX1,GLUL,LAMP1,LAPTM4B,LDHB,PSAP	9 (2)
CAMK2G				0.00325	HBA1/HBA2,HBB
CAMK2D				0.00325	HBA1/HBA2,HBB
FOLR1				0.00355	ALDOC,ATP6V1B2,CELF2,GAS5,HNRNPDL,NAP1L1,S100A4,TPI1,TTC3
Calcineurin protein(s)				0.00371	RCAN1,SLC8A1,TSG101
LCP2				0.00371	FYB1,LAMP1,ZBTB16
ICMT				0.00386	GDI1,GNB1,REEP5,RHOA,SERINC1
THBS4			1.987	0.00386	ATF4,CALR,CHUK,P4HB
WNT3A			-1.808	0.00422	ATP5MC3,COX4I1,COX5A,CTNNB1,NDUFB10,NDUFB8,NDUFV1,RHOA,TBX3,WNT7B
TCF7L2		Activated	2.385	0.00439	ATP6V1G1,CDK19,CNP,CREB5,DDC,DHCR24,ENPP4,FKBP1A,FTH1,GLUL,HIPK2,LAMP1,MBP,NUDT4,PLP1,RHOA,SLC1A2,SMIM15,TPPP
PTHLH				0.00443	COMMD3-BMI1,CTNNB1,GPX4,IHH,SOD1
MBOAT7				0.00497	ACLY,DHCR24,HMGCS1
PPARGC1B		Activated	2.236	0.00574	ATP5MF,CKB,COX4I1,COX5A,NDUFV2
UCP1			0.093	0.00579	ATF4,CHCHD10,DKK3,EMB,GHITM,GPX4,ITPR1,NDUFB8,PSD3,TPPP,UBC,XPR1
RRP1B				0.00616	ANAPC13,EIF4B,HDAC11,RPL13,RPL14,RPS14,Rps27/Rps27rt,RPS3,RPS5
PANX1				0.00636	FTH1,NCOA4
EN2				0.00636	ALDOC,SNCA
GRM3				0.00636	SLC1A2,SLC1A3
ATP7A				0.00636	CCK,PLP1
SAG				0.00636	NSF,VAMP2
TLX3				0.00647	CCK,GABRA1,GRIA2
H1-6			0.707	0.00789	ARPC5,ATP6V0E2,CD81,GLUL,GPM6A,KIF21B,PARVA,TEX2
H1f1			0.707	0.00789	ARPC5,ATP6V0E2,CD81,GLUL,GPM6A,KIF21B,PARVA,TEX2
THRAP3				0.0082	APLP2,DDX17,NR1D2
KIF3A				0.0082	CTNNB1,HMGCS1,IHH
POU5F1			0.978	0.00861	ALDOC,GPI,LAMP1,PSAP,RCAN1,SMPD1,TBX3
PRKAG3				0.0097	ATP1B1,COMMD3-BMI1,NAP1L1,RPL5,STK25,XPR1
SFPQ	1.764			0.0102	BEX1,NSFL1C,SFI1
ZC3H10				0.0104	ATP5F1A,NDUFB8
Presenilin				0.0104	PRNP,RYR2
EN1				0.0104	ALDOC,SNCA
RBFOX2				0.0104	PTBP2,SRSF7
BCL11B		Activated	2.433	0.0106	NGEF,RORA,Vmn1r172 (includes others),Vmn2r26 (includes others),Vmn2r88 (includes others),ZBTB16
NPR1			-1.067	0.0116	GUCY1A1,PPP3R1,RCAN1,RGS4
EIF2AK4			1.131	0.0116	ATF4,ATP2A2,MBP,PLP1
RPTOR			1.706	0.0136	ATP5F1D,COX4I1,CTNNB1,DHCR24,GHITM,GPI,HMGCS1,MSMO1,SOCS5,TPI1
RB1		Activated	3	0.0146	ATP1A1,ATP1B1,ATP5F1A,Atp5k,ATP6V1F,COX4I1,GHITM,GNAI1,HSBP1,MDH1,NDUFA13,NDUFA5,NDUFB10,NDUFB8,NDUFV1,PRKAR1A,UQCRFS1,UQCRQ
SH3TC2		Activated	2	0.015	ACLY,DHCR24,HMGCS1,MBP
CYP3A				0.0152	CYP7B1,HMGCS1
PGRMC2				0.0152	ATP5F1A,NDUFB8
ELP1				0.0152	CTNNB1,RHOA
GJA8				0.0152	ATF4,CALR
SLC6A2				0.0152	DYNLL1,PSAP
MAP4K4		Inhibited	-2.333	0.0164	ACLY,Calm1 (includes others),DHODH,GLUL,LDHB,NDUFA5,NDUFV1,PDXP,UQCRFS1
ZFHX3				0.0172	RORA,RPLP2,RPS12,RPS14,TUBA1A,TUBA1B,Ubb
DNMT3A	1.141		0	0.0172	AKAP6,ATP2B4,CPLX2,GRINA,GRK3,GUCY1A1,HDAC4,PPP3R1,RYR2,SLC8A1
PITHD1				0.0208	PRKAR1A,PSMC2
HNRNPR				0.0208	GPM6B,SMARCA2
CASQ2				0.0208	CALR,RYR2
SLC19A1				0.0208	NDRG2,SKP1
Gm26313				0.0208	GPM6B,SMARCA2
RHOJ				0.024	ATP2A2,CNBP,LRP1B
CALR	1.571			0.024	ATP2A2,Calm1 (includes others),RYR2
LEP			1.437	0.0251	ACLY,ATP2A2,ATP5F1A,ATP5PB,CCK,CCN1,MBP,MSMO1,MT-CO3,MT-CYB,PLP1,PRDX1,SLC25A5,SMPD1,SOD1
FLCN			-1.977	0.0257	CKB,COX4I1,MT-CYB,NDUFV2
BCKDK				0.0272	MBP,PLP1
Cdk				0.0272	COX5A,IDH3A
TLX1				0.0272	CCK,GABRA1
TTN				0.0272	ATP2A2,Calm1 (includes others)
BACE1				0.0272	MBP,PLP1
SOX9				0.029	COMMD3-BMI1,IHH,PTGDS,S100A4,WWP1
DYSF				0.0306	ACLY,ARPC2,GABARAPL1,IDH3A,PLPP3,PSAP,S100A4
mir-146				0.0313	ALDOA,GPI,MBP
SUB1				0.0313	NDUFB10,NDUFB8,NDUFB9
AMOT				0.0333	CCN1
Camk				0.0333	CCK
FXN				0.0333	ACLY
FOXD2				0.0333	PRKAR1A
SLC17A7				0.0333	SLC1A2
ACSBG1				0.0333	SNCA
H2BW2				0.0333	DNMT3A
KIF21A				0.0333	MAP1B
SUN3				0.0333	SPAG4
CCM2				0.0333	RHOA
Pantr2				0.0333	POU3F3
JPH2				0.0333	SLC8A1
POU6F1				0.0333	TMEM59
IL-2R				0.0333	COMMD3-BMI1
T-cell alpha/beta receptor				0.0333	Klra7 (includes others)
TNNC1				0.0333	SLC8A1
ARHGAP26				0.0333	RHOA
RRAD				0.0333	ATP2A2
AKAP11				0.0333	RHOA
XPC				0.0333	MBP
SYP				0.0333	VAMP2
DCLK1				0.0333	SNCA
AMD1				0.0333	Tmsb4x (includes others)
JUP				0.0333	CTNNB1
GDF15				0.0333	RHOA
miR-214-3p (and other miRNAs w/seed CAGCAGG)				0.0333	ATF4
KDELR2				0.0333	SNCA
SAP18				0.0333	MTTP
AXIN2				0.0333	CTNNB1
XRCC5				0.0333	APOE
PISD				0.0333	PCYT2
TNR				0.0333	SLC1A3
OMP				0.0333	CCK
ARSA				0.0333	MBP
PDIA3				0.0333	PRNP
PRKAR2A				0.0333	PRKAR1A
CHMP4B				0.0333	SNCA
C8orf44-SGK3/SGK3				0.0333	CTNNB1
Uchl1os				0.0333	UCHL1
SV2C				0.0333	SNCA
ERCC6				0.0333	MBP
ATP6V1B1				0.0333	ATP6V1B2
EEF1A1				0.0333	S100A4
SYNCRIP				0.0333	RHOA
ARID4A				0.0342	EMB,PTGDS
LY9				0.0342	CD81,ZBTB16
CDK5				0.0342	MBP,PLP1
ARID4B				0.0342	EMB,PTGDS
MTM1				0.0354	BECN1,GABARAPL1,ZFAND5
AR			-0.835	0.0358	ANXA9,ATP2A2,AVPR1A,BEX1,CCT3,CDC42SE2,CXXC5,EMB,FABP5,IL17RE,KCNJ3,Nrgn,PDCL,PDGFA,PLP1,PTGDS,RORA,STARD10,TMEM176A
STAT5B		Activated	2.36	0.0371	APOE,BAIAP2,CD248,CD81,Fbxw21 (includes others),GABARAPL1,GLUL,LDHB,NIPAL1,RPL21,RPL38,RPL5,RPS14,SUSD4,TMEM176A,TOX
E2F1			-0.555	0.0384	BECN1,Calm1 (includes others),CALR,COX4I1,COX5A,Cox7c,IDH3A,NDUFC1,RBBP4
MPZ				0.0397	ATF4,HMGCS1,MBP
PRNP	1.148			0.0397	APOE,ATF4,BECN1
AMPK			0.9	0.04	CTNNB1,IDH3A,LDHB,MT-CYB
TRPM8				0.0418	GPX4,SOD1
ATP7B			1	0.0433	ACLY,FABP5,HMGCS1,MSMO1
FYN			-0.577	0.0433	MBP,PLP1,PTPN5,RORA
FGFR2				0.0443	IHH,MBP,PLP1
ITGAM				0.0492	APOE,CHUK,GSTM3
PRMT1				0.0492	CNP,COX4I1,MBP
MEF2				0.05	CTNNB1,LDHB
THRA			1.969	0.0505	ATF4,COX4I1,CTNNB1,KCNJ10,LAMP1,MBP
MYRF		Activated	2.224	0.0799	Cox7c,IVNS1ABP,MBP,NGEF,PLP1
PPARG		Activated	2.578	0.109	APOE,BECN1,CPLX2,CTNNB1,ENO2,FABP5,HIVEP2,MTTP,NDUFA5,NPEPPS,NSF,OXR1,Prl2c2 (includes others),SOD1,VAMP2,YWHAE
CX3CR1		Activated	2.333	0.116	CTNNB1,EXOC4,KIF21B,MAP1B,OCRL,PITPNM3,SFPQ,SNCA,TUBB2A
ESR2		Activated	2.132	0.119	EMB,Fbxw21 (includes others),HMGCS1,KCNJ3,LIMCH1,LRP1B,PDGFA,SUSD4,TSPAN13
PPARD			1.937	0.248	APOE,LDHB,NDUFB10,PLP1,SCARB2,SFI1,UBC,Vmn2r88 (includes others)
RGS4	1.06	Inhibited	-2	0.345	CPLX2,HJURP,PPP3R1,SFI1
HIF1A			-1.913	0.375	ATP5MC3,COX4I1,COX5A,MT-CO3,NDUFB10,NDUFB8,NDUFV1,PDGFA
IL17A			1.982	0.48	Calm1 (includes others),CX3CL1,JAK1,SDC2
PPARA			1.823	1	CCNT1,CYP7B1,DYNLL1,FABP5,FBXO21,GSTM3,H2AZ1,HMGCS1,MSMO1,MTTP,RTN4
