# Supplementary material for: Probing regenerative heterogeneity of corticospinal neurons with scRNA-Seq
Source: Research Square preprint supplement (doi:10.21203/rs.3.rs-2588274/v1), 2023-02-21
Supplement: Supplementary file 4 [file 676850bb7b670ae4145bf3a7.xlsx]

## Sheet: Gene Ontology underexpressed an
Analysis Type:	PANTHER Overrepresentation Test (Released 20210224)
Annotation Version and Release Date:	GO Ontology database DOI: 10.5281/zenodo.5228828 Released 2021-08-18
Analyzed List:	upload_1 (Mus musculus)
Reference List:	Mus musculus (all genes in database)
Test Type:	FISHER
Correction:	FDR
GO biological process complete	Mus musculus - REFLIST (21988)	upload_1 (120)	upload_1 (expected)	upload_1 (over/under)	upload_1 (fold Enrichment)	upload_1 (raw P-value)	upload_1 (FDR)
regulation of cellular component organization (GO:0051128)	2498	30	13.63	+	2.2	3.28e-05	0.0397
regulation of cellular protein localization (GO:1903827)	562	13	3.07	+	4.24	1.5e-05	0.0215
macromolecule localization (GO:0033036)	2295	29	12.53	+	2.32	1.56e-05	0.0204
localization (GO:0051179)	5066	51	27.65	+	1.84	3.27e-06	0.0172
cellular component organization or biogenesis (GO:0071840)	5463	52	29.81	+	1.74	1.07e-05	0.0169
positive regulation of cellular process (GO:0048522)	5825	55	31.79	+	1.73	6.06e-06	0.0159
neurogenesis (GO:0022008)	1514	23	8.26	+	2.78	7.65e-06	0.0151
neuron differentiation (GO:0030182)	1093	19	5.97	+	3.19	8.53e-06	0.0149
generation of neurons (GO:0048699)	1386	23	7.56	+	3.04	1.8e-06	0.0142
regulation of cellular localization (GO:0060341)	870	17	4.75	+	3.58	6.09e-06	0.0137
regulation of protein localization (GO:0032880)	927	18	5.06	+	3.56	3.43e-06	0.0135
positive regulation of biological process (GO:0048518)	6350	59	34.66	+	1.7	3.86e-06	0.0122
positive regulation of cellular protein localization (GO:1903829)	277	11	1.51	+	7.28	5e-07	0.00788

## Sheet: specific
GO biological process complete	upload_1 (FDR)
regulation of cellular component organization (GO:0051128)	0.0397
regulation of cellular protein localization (GO:1903827)	0.0215
macromolecule localization (GO:0033036)	0.0204
localization (GO:0051179)	0.0172
cellular component organization or biogenesis (GO:0071840)	0.0169
positive regulation of cellular process (GO:0048522)	0.0159
neurogenesis (GO:0022008)	0.0151
neuron differentiation (GO:0030182)	0.0149
generation of neurons (GO:0048699)	0.0142
regulation of cellular localization (GO:0060341)	0.0137
regulation of protein localization (GO:0032880)	0.0135
positive regulation of biological process (GO:0048518)	0.0122
positive regulation of cellular protein localization (GO:1903829)	0.00788
