# Supplementary material for: Probing regenerative heterogeneity of corticospinal neurons with scRNA-Seq
Source: Research Square preprint supplement (doi:10.21203/rs.3.rs-2588274/v1), 2023-02-21
Supplement: Supplementary file 5 [file beb2ab3348a40226178dffa1.xlsx]

## Sheet: 6A. GO Overexpressed
GO biological process complete	FDR
oxidative phosphorylation (GO:0006119)	1.99e-09
cellular metabolic process (GO:0044237)	3.95e-09
cellular respiration (GO:0045333)	5.29e-09
organonitrogen compound metabolic process (GO:1901564)	6.73e-09
aerobic respiration (GO:0009060)	6.83e-09
generation of precursor metabolites and energy (GO:0006091)	7.16e-09
energy derivation by oxidation of organic compounds (GO:0015980)	1.13e-08
purine ribonucleoside triphosphate metabolic process (GO:0009205)	2.93e-08
purine nucleoside triphosphate metabolic process (GO:0009144)	3.96e-08
ribonucleoside triphosphate metabolic process (GO:0009199)	4.04e-08
cytoplasmic translation (GO:0002181)	4.43e-08
ATP metabolic process (GO:0046034)	9.77e-08
organonitrogen compound biosynthetic process (GO:1901566)	1.17e-07
nucleoside triphosphate metabolic process (GO:0009141)	1.22e-07
proton motive force-driven mitochondrial ATP synthesis (GO:0042776)	5e-07
ATP biosynthetic process (GO:0006754)	8.92e-07
proton motive force-driven ATP synthesis (GO:0015986)	9.67e-07
cellular process (GO:0009987)	1.53e-06
ribonucleotide metabolic process (GO:0009259)	2.28e-06
purine ribonucleoside triphosphate biosynthetic process (GO:0009206)	2.79e-06
purine nucleoside triphosphate biosynthetic process (GO:0009145)	2.98e-06
purine ribonucleotide metabolic process (GO:0009150)	3.15e-06
organophosphate metabolic process (GO:0019637)	3.27e-06
ribose phosphate metabolic process (GO:0019693)	3.35e-06
ribonucleoside triphosphate biosynthetic process (GO:0009201)	3.93e-06
cellular amide metabolic process (GO:0043603)	5.9e-06
metabolic process (GO:0008152)	5.99e-06
purine nucleotide metabolic process (GO:0006163)	6.04e-06
nitrogen compound metabolic process (GO:0006807)	6.26e-06
nucleotide metabolic process (GO:0009117)	6.86e-06
organic substance biosynthetic process (GO:1901576)	8.66e-06
nucleoside phosphate metabolic process (GO:0006753)	8.79e-06
nucleoside triphosphate biosynthetic process (GO:0009142)	9.1e-06
establishment of localization (GO:0051234)	9.3e-06
peptide metabolic process (GO:0006518)	9.33e-06
ribonucleotide biosynthetic process (GO:0009260)	1.12e-05
biosynthetic process (GO:0009058)	1.2e-05
cellular nitrogen compound metabolic process (GO:0034641)	1.44e-05
purine-containing compound metabolic process (GO:0072521)	1.73e-05
transport (GO:0006810)	1.74e-05
ribose phosphate biosynthetic process (GO:0046390)	1.82e-05
purine ribonucleotide biosynthetic process (GO:0009152)	2.53e-05
cellular nitrogen compound biosynthetic process (GO:0044271)	3.48e-05
localization (GO:0051179)	3.49e-05
translation (GO:0006412)	3.6e-05
purine nucleotide biosynthetic process (GO:0006164)	4.21e-05
nucleobase-containing small molecule metabolic process (GO:0055086)	4.22e-05
purine-containing compound biosynthetic process (GO:0072522)	6.94e-05
aerobic electron transport chain (GO:0019646)	7.35e-05
cellular biosynthetic process (GO:0044249)	8.56e-05
peptide biosynthetic process (GO:0043043)	8.84e-05
establishment of localization in cell (GO:0051649)	0.000103
nucleotide biosynthetic process (GO:0009165)	0.000118
proton transmembrane transport (GO:1902600)	0.000131
nucleoside phosphate biosynthetic process (GO:1901293)	0.000157
regulation of localization (GO:0032879)	0.000173
mitochondrial ATP synthesis coupled electron transport (GO:0042775)	0.000204
amide biosynthetic process (GO:0043604)	0.000253
ATP synthesis coupled electron transport (GO:0042773)	0.000253
respiratory electron transport chain (GO:0022904)	0.000288
regulation of transport (GO:0051049)	0.000293
primary metabolic process (GO:0044238)	0.000375
small molecule metabolic process (GO:0044281)	0.000632
cellular chemical homeostasis (GO:0055082)	0.000674
electron transport chain (GO:0022900)	0.000714
organic substance metabolic process (GO:0071704)	0.00116
cellular ion homeostasis (GO:0006873)	0.00121
phosphate-containing compound metabolic process (GO:0006796)	0.00124
phosphorus metabolic process (GO:0006793)	0.00145
organophosphate biosynthetic process (GO:0090407)	0.00159
cellular macromolecule biosynthetic process (GO:0034645)	0.0019
regulation of muscle contraction (GO:0006937)	0.0019
cellular metal ion homeostasis (GO:0006875)	0.00192
cellular cation homeostasis (GO:0030003)	0.00202
cellular homeostasis (GO:0019725)	0.00304
regulation of cardiac muscle contraction (GO:0055117)	0.00313
cellular macromolecule metabolic process (GO:0044260)	0.00405
regulation of biological quality (GO:0065008)	0.00491
positive regulation of cell death (GO:0010942)	0.00569
regulation of muscle system process (GO:0090257)	0.00628
modulation of chemical synaptic transmission (GO:0050804)	0.00663
regulation of trans-synaptic signaling (GO:0099177)	0.00672
negative regulation of calcium ion transmembrane transporter activity (GO:1901020)	0.00709
regulation of vesicle-mediated transport (GO:0060627)	0.00831
detection of calcium ion (GO:0005513)	0.00851
positive regulation of transport (GO:0051050)	0.0105
regulation of striated muscle contraction (GO:0006942)	0.0105
chemical homeostasis (GO:0048878)	0.0109
regulation of intrinsic apoptotic signaling pathway (GO:2001242)	0.012
inorganic ion homeostasis (GO:0098771)	0.0132
protein metabolic process (GO:0019538)	0.0138
positive regulation of apoptotic process (GO:0043065)	0.0147
cellular localization (GO:0051641)	0.0149
positive regulation of autophagic cell death (GO:1904094)	0.0154
ion homeostasis (GO:0050801)	0.0169
positive regulation of programmed cell death (GO:0043068)	0.0181
regulation of calcium ion transmembrane transporter activity (GO:1901019)	0.0191
response to endoplasmic reticulum stress (GO:0034976)	0.0201
regulation of the force of heart contraction (GO:0002026)	0.0221
positive regulation of cyclic-nucleotide phosphodiesterase activity (GO:0051343)	0.0229
metal ion homeostasis (GO:0055065)	0.0234
regulation of cell death (GO:0010941)	0.0239
inorganic cation transmembrane transport (GO:0098662)	0.0241
cation homeostasis (GO:0055080)	0.0242
intracellular transport (GO:0046907)	0.0256
positive regulation of sequestering of calcium ion (GO:0051284)	0.0278
regulation of cell communication (GO:0010646)	0.0279
regulation of signaling (GO:0023051)	0.0281
cellular calcium ion homeostasis (GO:0006874)	0.0298
inorganic ion transmembrane transport (GO:0098660)	0.0314
secretion by cell (GO:0032940)	0.0318
negative regulation of calcium ion transmembrane transport (GO:1903170)	0.0325
export from cell (GO:0140352)	0.0376
regulation of programmed cell death (GO:0043067)	0.0377
regulation of ryanodine-sensitive calcium-release channel activity (GO:0060314)	0.0443
carbohydrate derivative metabolic process (GO:1901135)	0.045
carbohydrate derivative biosynthetic process (GO:1901137)	0.048
regulation of apoptotic process (GO:0042981)	0.0483
cell surface receptor signaling pathway (GO:0007166)	0.0483

## Sheet: 6B. GO Underexpressed
GO biological process complete	upload_1 (FDR)
positive regulation of cellular process (GO:0048522)	0.00431
neuron differentiation (GO:0030182)	0.00541
macromolecule localization (GO:0033036)	0.00573
generation of neurons (GO:0048699)	0.00654
positive regulation of biological process (GO:0048518)	0.00662
regulation of protein localization (GO:0032880)	0.00726
regulation of cellular localization (GO:0060341)	0.0085
positive regulation of protein localization (GO:1903829)	0.00956
cellular component organization or biogenesis (GO:0071840)	0.0125
regulation of signaling (GO:0023051)	0.0228
regulation of cell communication (GO:0010646)	0.0245
neurogenesis (GO:0022008)	0.0269
regulation of cellular component organization (GO:0051128)	0.033
regulation of localization (GO:0032879)	0.0365
localization (GO:0051179)	0.0368
cellular macromolecule localization (GO:0070727)	0.0494
protein localization (GO:0008104)	0.0516
