# Supplementary material for: Probing regenerative heterogeneity of corticospinal neurons with scRNA-Seq
Source: Research Square preprint supplement (doi:10.21203/rs.3.rs-2588274/v1), 2023-02-21
Supplement: Supplementary file 6 [file caa8f82ffc6ceadee33db53e.xlsx]

## Sheet: Marker genes for Clusters 1,2
GO biological process complete	FDR p-Value
neuron fate commitment (GO:0048663)	0.000175
cellular response to vascular endothelial growth factor stimulus (GO:0035924)	0.0268
embryonic cranial skeleton morphogenesis (GO:0048701)	0.0242
ventricular cardiac muscle tissue morphogenesis (GO:0055010)	0.0282
cell fate specification (GO:0001708)	0.00242
adenylate cyclase-inhibiting G protein-coupled receptor signaling pathway (GO:0007193)	0.0201
negative regulation of peptide hormone secretion (GO:0090278)	0.0436
positive regulation of dendritic spine development (GO:0060999)	0.0487
negative regulation of peptide secretion (GO:0002792)	0.0483
cardiac muscle tissue morphogenesis (GO:0055008)	0.0289
muscle tissue morphogenesis (GO:0060415)	0.0213
cranial skeletal system development (GO:1904888)	0.0427
negative regulation of protein binding (GO:0032091)	0.0185
muscle organ morphogenesis (GO:0048644)	0.0348
cell fate commitment (GO:0045165)	1.24e-05
adenylate cyclase-activating G protein-coupled receptor signaling pathway (GO:0007189)	0.0394
heart morphogenesis (GO:0003007)	0.000294
adenylate cyclase-modulating G protein-coupled receptor signaling pathway (GO:0007188)	0.00448
negative regulation of Wnt signaling pathway (GO:0030178)	0.0315
regulation of insulin secretion (GO:0050796)	0.0274
protein autophosphorylation (GO:0046777)	0.0406
embryonic organ morphogenesis (GO:0048562)	0.00162
bone development (GO:0060348)	0.0355
negative regulation of secretion (GO:0051048)	0.047
regulation of peptide hormone secretion (GO:0090276)	0.0282
regulation of peptide secretion (GO:0002791)	0.0333
regulation of peptide transport (GO:0090087)	0.0354
regulation of neurogenesis (GO:0050767)	0.000343
regulation of nervous system development (GO:0051960)	3.68e-05
muscle organ development (GO:0007517)	0.0179
ear development (GO:0043583)	0.0442
embryonic organ development (GO:0048568)	0.00028
positive regulation of neurogenesis (GO:0050769)	0.025
negative regulation of growth (GO:0045926)	0.0426
regulation of developmental growth (GO:0048638)	0.00393
regulation of Wnt signaling pathway (GO:0030111)	0.0254
camera-type eye development (GO:0043010)	0.0158
sensory organ morphogenesis (GO:0090596)	0.0355
positive regulation of nervous system development (GO:0051962)	0.0252
regulation of cell development (GO:0060284)	0.000396
forebrain development (GO:0030900)	0.0159
skeletal system development (GO:0001501)	0.00245
muscle tissue development (GO:0060537)	0.0356
sensory system development (GO:0048880)	0.0188
regionalization (GO:0003002)	0.0436
eye development (GO:0001654)	0.0289
pattern specification process (GO:0007389)	0.012
visual system development (GO:0150063)	0.0311
cell junction organization (GO:0034330)	0.00823
sensory organ development (GO:0007423)	0.00326
blood circulation (GO:0008015)	0.0435
regulation of growth (GO:0040008)	0.00174
heart development (GO:0007507)	0.0116
embryonic morphogenesis (GO:0048598)	0.006
head development (GO:0060322)	0.00396
brain development (GO:0007420)	0.0118
animal organ morphogenesis (GO:0009887)	0.000186
central nervous system development (GO:0007417)	0.00125
cell part morphogenesis (GO:0032990)	0.0426
regulation of cellular component biogenesis (GO:0044087)	0.000427
negative regulation of cell communication (GO:0010648)	1.92e-05
negative regulation of signaling (GO:0023057)	1.91e-05
tissue morphogenesis (GO:0048729)	0.0333
positive regulation of cell differentiation (GO:0045597)	0.00245
cell migration (GO:0016477)	0.00472
neuron differentiation (GO:0030182)	0.000747
regulation of system process (GO:0044057)	0.044
regulation of anatomical structure morphogenesis (GO:0022603)	0.00225
circulatory system development (GO:0072359)	0.00403
positive regulation of developmental process (GO:0051094)	3.65e-05
regulation of multicellular organismal development (GO:2000026)	3.12e-05
negative regulation of cell population proliferation (GO:0008285)	0.0202
neurogenesis (GO:0022008)	2.88e-05
generation of neurons (GO:0048699)	0.000106
negative regulation of developmental process (GO:0051093)	0.00546
regulation of cell cycle (GO:0051726)	0.0047
regulation of developmental process (GO:0050793)	3.85e-08
locomotion (GO:0040011)	0.000904
localization of cell (GO:0051674)	0.00521
cell motility (GO:0048870)	0.00513
negative regulation of multicellular organismal process (GO:0051241)	0.00395
epithelium development (GO:0060429)	0.00806
regulation of cellular component movement (GO:0051270)	0.00696
regulation of cell differentiation (GO:0045595)	0.000189
movement of cell or subcellular component (GO:0006928)	0.000945
negative regulation of signal transduction (GO:0009968)	0.00597
embryo development (GO:0009790)	0.00693
regulation of cell motility (GO:2000145)	0.036
tissue development (GO:0009888)	0.000765
cell projection organization (GO:0030030)	0.016
regulation of cell migration (GO:0030334)	0.0487
plasma membrane bounded cell projection organization (GO:0120036)	0.0222
animal organ development (GO:0048513)	1.12e-07
nervous system development (GO:0007399)	0.000147
regulation of locomotion (GO:0040012)	0.0438
positive regulation of multicellular organismal process (GO:0051240)	0.00378
regulation of multicellular organismal process (GO:0051239)	4.67e-06
anatomical structure morphogenesis (GO:0009653)	0.000166
regulation of biological quality (GO:0065008)	2.86e-08
positive regulation of cell communication (GO:0010647)	0.0071
positive regulation of signal transduction (GO:0009967)	0.0171
positive regulation of signaling (GO:0023056)	0.0073
intracellular signal transduction (GO:0035556)	0.0398
system development (GO:0048731)	3.12e-08
cellular developmental process (GO:0048869)	1.07e-06
regulation of cell communication (GO:0010646)	1.03e-05
cell differentiation (GO:0030154)	1.75e-06
regulation of signaling (GO:0023051)	1.28e-05
regulation of intracellular signal transduction (GO:1902531)	0.0345
positive regulation of nucleic acid-templated transcription (GO:1903508)	0.0438
positive regulation of transcription, DNA-templated (GO:0045893)	0.0435
regulation of cellular component organization (GO:0051128)	0.00124
positive regulation of RNA biosynthetic process (GO:1902680)	0.0436
negative regulation of response to stimulus (GO:0048585)	0.0315
regulation of cell population proliferation (GO:0042127)	0.031
homeostatic process (GO:0042592)	0.0481
multicellular organism development (GO:0007275)	1.16e-07
regulation of signal transduction (GO:0009966)	0.00208
regulation of localization (GO:0032879)	0.00298
developmental process (GO:0032502)	1.22e-07
negative regulation of cellular process (GO:0048523)	3.14e-06
anatomical structure development (GO:0048856)	1.27e-06
negative regulation of biological process (GO:0048519)	1.1e-06
regulation of response to stimulus (GO:0048583)	0.00466
positive regulation of cellular process (GO:0048522)	4.24e-05
negative regulation of metabolic process (GO:0009892)	0.0484
positive regulation of biological process (GO:0048518)	4.1e-05
positive regulation of macromolecule metabolic process (GO:0010604)	0.0438
cellular component organization or biogenesis (GO:0071840)	0.00228
cellular component organization (GO:0016043)	0.00379
regulation of nucleobase-containing compound metabolic process (GO:0019219)	0.0479
regulation of gene expression (GO:0010468)	0.0166
localization (GO:0051179)	0.0118
regulation of primary metabolic process (GO:0080090)	0.00994
regulation of nitrogen compound metabolic process (GO:0051171)	0.0221
regulation of macromolecule metabolic process (GO:0060255)	0.0183
multicellular organismal process (GO:0032501)	0.00244
regulation of metabolic process (GO:0019222)	0.0273
biological regulation (GO:0065007)	0.00159
regulation of cellular process (GO:0050794)	0.00972
regulation of biological process (GO:0050789)	0.00788
cellular process (GO:0009987)	0.0102
biological_process (GO:0008150)	0.018
Unclassified (UNCLASSIFIED)	0.0182
sensory perception of chemical stimulus (GO:0007606)	0.000285
sensory perception of smell (GO:0007608)	4e-05
humoral immune response (GO:0006959)	0.0374
