# Supplementary material for: Probing regenerative heterogeneity of corticospinal neurons with scRNA-Seq
Source: Research Square preprint supplement (doi:10.21203/rs.3.rs-2588274/v1), 2023-02-21
Supplement: Supplementary file 7 [file d77506b17c253f662d18f36c.xlsx]

## Sheet: Full
GO biological process complete	Mus musculus - REFLIST (21988)	upload_1 (531)	upload_1 (expected)	upload_1 (fold Enrichment)	upload_1 (raw P-value)	upload_1 (FDR)
cellular metabolic process (GO:0044237)	6518	249	157.41	1.58	1.76e-16	2.78e-12
peptide metabolic process (GO:0006518)	486	48	11.74	4.09	2.02e-15	1.06e-11
cellular process (GO:0009987)	15286	450	369.15	1.22	1.41e-15	1.11e-11
translation (GO:0006412)	323	38	7.8	4.87	1.34e-14	5.29e-11
peptide biosynthetic process (GO:0043043)	344	39	8.31	4.69	1.78e-14	5.6e-11
cellular amide metabolic process (GO:0043603)	721	57	17.41	3.27	3.37e-14	8.84e-11
organonitrogen compound biosynthetic process (GO:1901566)	1106	72	26.71	2.7	1.12e-13	2.53e-10
ATP metabolic process (GO:0046034)	176	27	4.25	6.35	3.82e-13	7.51e-10
amide biosynthetic process (GO:0043604)	443	42	10.7	3.93	4.36e-13	7.64e-10
metabolic process (GO:0008152)	7571	265	182.84	1.45	5.8e-13	9.14e-10
cellular nitrogen compound metabolic process (GO:0034641)	2893	130	69.86	1.86	4.27e-12	6.11e-09
oxidative phosphorylation (GO:0006119)	80	18	1.93	9.32	1.37e-11	1.8e-08
establishment of localization in cell (GO:0051649)	1577	84	38.08	2.21	3.51e-11	4.25e-08
cellular nitrogen compound biosynthetic process (GO:0044271)	1106	66	26.71	2.47	5.9e-11	6.64e-08
transport (GO:0006810)	3651	149	88.17	1.69	7.3e-11	7.67e-08
cellular respiration (GO:0045333)	149	22	3.6	6.11	1.14e-10	1.05e-07
organonitrogen compound metabolic process (GO:1901564)	4391	170	106.04	1.6	1.12e-10	1.11e-07
establishment of localization (GO:0051234)	3818	153	92.2	1.66	1.54e-10	1.35e-07
cellular component biogenesis (GO:0044085)	2326	107	56.17	1.9	1.67e-10	1.38e-07
proton transmembrane transport (GO:1902600)	71	16	1.71	9.33	1.85e-10	1.46e-07
cellular protein-containing complex assembly (GO:0034622)	689	48	16.64	2.88	2.39e-10	1.79e-07
organic substance biosynthetic process (GO:1901576)	2093	99	50.54	1.96	2.53e-10	1.81e-07
cellular biosynthetic process (GO:0044249)	2019	96	48.76	1.97	3.53e-10	2.42e-07
biosynthetic process (GO:0009058)	2159	100	52.14	1.92	4.89e-10	3.21e-07
aerobic respiration (GO:0009060)	120	19	2.9	6.56	7.5e-10	4.54e-07
cellular localization (GO:0051641)	2267	103	54.75	1.88	7.21e-10	4.54e-07
cytoplasmic translation (GO:0002181)	69	15	1.67	9	1.06e-09	6.17e-07
protein-containing complex assembly (GO:0065003)	1047	60	25.28	2.37	2.47e-09	1.29e-06
cellular component organization or biogenesis (GO:0071840)	5463	195	131.93	1.48	2.46e-09	1.34e-06
protein-containing complex subunit organization (GO:0043933)	1191	65	28.76	2.26	2.43e-09	1.37e-06
nitrogen compound metabolic process (GO:0006807)	5847	205	141.2	1.45	2.99e-09	1.52e-06
regulation of transport (GO:0051049)	1907	89	46.05	1.93	4.15e-09	2.04e-06
generation of precursor metabolites and energy (GO:0006091)	297	28	7.17	3.9	4.28e-09	2.04e-06
cellular component assembly (GO:0022607)	2098	95	50.67	1.88	4.85e-09	2.25e-06
localization (GO:0051179)	5066	182	122.34	1.49	6.64e-09	2.99e-06
energy derivation by oxidation of organic compounds (GO:0015980)	210	23	5.07	4.54	8.27e-09	3.62e-06
regulation of biological quality (GO:0065008)	3876	147	93.6	1.57	1.54e-08	6.57e-06
cellular protein metabolic process (GO:0044267)	2917	118	70.44	1.68	2.46e-08	1.02e-05
cellular component organization (GO:0016043)	5271	185	127.29	1.45	2.66e-08	1.08e-05
primary metabolic process (GO:0044238)	6405	213	154.68	1.38	9.97e-08	3.93e-05
regulation of localization (GO:0032879)	2915	116	70.4	1.65	1.03e-07	3.95e-05
electron transport chain (GO:0022900)	88	14	2.13	6.59	1.23e-07	4.62e-05
organelle organization (GO:0006996)	3251	125	78.51	1.59	1.42e-07	5.19e-05
organic substance metabolic process (GO:0071704)	7141	231	172.45	1.34	1.82e-07	6.52e-05
intracellular transport (GO:0046907)	1200	60	28.98	2.07	2.49e-07	8.71e-05
respiratory electron transport chain (GO:0022904)	80	13	1.93	6.73	2.79e-07	9.57e-05
ribonucleoprotein complex assembly (GO:0022618)	166	18	4.01	4.49	3.97e-07	0.000133
mitochondrial ATP synthesis coupled electron transport (GO:0042775)	58	11	1.4	7.85	5.99e-07	0.000197
ribonucleoprotein complex subunit organization (GO:0071826)	173	18	4.18	4.31	6.9e-07	0.000222
ATP synthesis coupled electron transport (GO:0042773)	60	11	1.45	7.59	8.06e-07	0.000254
aerobic electron transport chain (GO:0019646)	49	10	1.18	8.45	1.09e-06	0.000336
modulation of chemical synaptic transmission (GO:0050804)	521	33	12.58	2.62	1.25e-06	0.000379
regulation of trans-synaptic signaling (GO:0099177)	522	33	12.61	2.62	1.3e-06	0.00038
ribonucleoprotein complex biogenesis (GO:0022613)	399	28	9.64	2.91	1.28e-06	0.000381
ribosomal small subunit assembly (GO:0000028)	19	7	0.46	15.26	1.74e-06	0.00048
energy coupled proton transport, down electrochemical gradient (GO:0015985)	19	7	0.46	15.26	1.74e-06	0.000489
ATP synthesis coupled proton transport (GO:0015986)	19	7	0.46	15.26	1.74e-06	0.000497
ion transmembrane transport (GO:0034220)	617	36	14.9	2.42	2.61e-06	0.000709
inorganic ion transmembrane transport (GO:0098660)	497	31	12	2.58	3.54e-06	0.000945
sensory perception of chemical stimulus (GO:0007606)	1223	8	29.53	0.27	4.23e-06	0.00109
ion homeostasis (GO:0050801)	794	42	19.17	2.19	4.18e-06	0.0011
mitochondrial ATP synthesis coupled proton transport (GO:0042776)	14	6	0.34	17.75	4.89e-06	0.00122
cellular macromolecule biosynthetic process (GO:0034645)	1196	56	28.88	1.94	4.84e-06	0.00123
macromolecule biosynthetic process (GO:0009059)	1208	56	29.17	1.92	5.64e-06	0.00139
ATP biosynthetic process (GO:0006754)	35	8	0.85	9.46	6.36e-06	0.00154
regulation of cellular component organization (GO:0051128)	2498	96	60.33	1.59	6.82e-06	0.00163
sensory perception of smell (GO:0007608)	1123	7	27.12	0.26	7.27e-06	0.00171
cellular macromolecule metabolic process (GO:0044260)	4038	140	97.52	1.44	7.38e-06	0.00171
organophosphate metabolic process (GO:0019637)	757	40	18.28	2.19	7.55e-06	0.00172
regulation of metal ion transport (GO:0010959)	443	28	10.7	2.62	8.32e-06	0.00185
protein metabolic process (GO:0019538)	3482	124	84.09	1.47	8.57e-06	0.00185
regulation of neurotransmitter levels (GO:0001505)	253	20	6.11	3.27	8.46e-06	0.00185
inorganic cation transmembrane transport (GO:0098662)	443	28	10.7	2.62	8.32e-06	0.00187
purine ribonucleoside triphosphate metabolic process (GO:0009205)	65	10	1.57	6.37	1.02e-05	0.00218
cellular homeostasis (GO:0019725)	847	43	20.45	2.1	1.25e-05	0.0026
organelle localization (GO:0051640)	498	30	12.03	2.49	1.25e-05	0.00263
regulation of vesicle-mediated transport (GO:0060627)	609	34	14.71	2.31	1.44e-05	0.00294
ribonucleoside triphosphate metabolic process (GO:0009199)	68	10	1.64	6.09	1.46e-05	0.00295
regulation of cellular localization (GO:0060341)	870	43	21.01	2.05	1.74e-05	0.00347
regulation of ion transport (GO:0043269)	747	39	18.04	2.16	1.89e-05	0.00367
inorganic ion homeostasis (GO:0098771)	747	39	18.04	2.16	1.89e-05	0.00372
cellular ion homeostasis (GO:0006873)	671	36	16.2	2.22	2.05e-05	0.00385
ribosomal small subunit biogenesis (GO:0042274)	71	10	1.71	5.83	2.05e-05	0.00388
regulation of cardiac muscle contraction (GO:0055117)	71	10	1.71	5.83	2.05e-05	0.00393
cellular chemical homeostasis (GO:0055082)	758	39	18.31	2.13	2.15e-05	0.00394
regulation of organelle organization (GO:0033043)	1205	54	29.1	1.86	2.14e-05	0.00396
regulation of muscle contraction (GO:0006937)	163	15	3.94	3.81	2.23e-05	0.00404
purine nucleoside triphosphate metabolic process (GO:0009144)	73	10	1.76	5.67	2.54e-05	0.00455
regulation of the force of heart contraction (GO:0002026)	31	7	0.75	9.35	2.61e-05	0.00456
chemical homeostasis (GO:0048878)	1178	53	28.45	1.86	2.59e-05	0.00458
ribonucleotide metabolic process (GO:0009259)	299	21	7.22	2.91	2.68e-05	0.00463
regulation of signaling (GO:0023051)	3280	116	79.21	1.46	2.76e-05	0.00473
regulation of muscle system process (GO:0090257)	254	19	6.13	3.1	2.89e-05	0.00489
metal ion homeostasis (GO:0055065)	657	35	15.87	2.21	3.03e-05	0.00508
relaxation of muscle (GO:0090075)	21	6	0.51	11.83	3.24e-05	0.00538
purine ribonucleotide metabolic process (GO:0009150)	280	20	6.76	2.96	3.31e-05	0.00544
regulation of heart contraction (GO:0008016)	191	16	4.61	3.47	3.49e-05	0.00567
cation transmembrane transport (GO:0098655)	478	28	11.54	2.43	3.55e-05	0.00571
purine ribonucleoside triphosphate biosynthetic process (GO:0009206)	46	8	1.11	7.2	3.63e-05	0.00573
regulation of cell communication (GO:0010646)	3270	115	78.97	1.46	3.6e-05	0.00573
cellular metal ion homeostasis (GO:0006875)	587	32	14.18	2.26	3.71e-05	0.00579
ribosome assembly (GO:0042255)	61	9	1.47	6.11	3.82e-05	0.00589
ribosome biogenesis (GO:0042254)	285	20	6.88	2.91	4.18e-05	0.00634
purine nucleoside triphosphate biosynthetic process (GO:0009145)	47	8	1.14	7.05	4.17e-05	0.00637
homeostatic process (GO:0042592)	1645	67	39.73	1.69	4.26e-05	0.00639
ion transport (GO:0006811)	1079	49	26.06	1.88	4.48e-05	0.00665
ribose phosphate metabolic process (GO:0019693)	311	21	7.51	2.8	4.58e-05	0.00674
ribonucleotide biosynthetic process (GO:0009260)	134	13	3.24	4.02	4.72e-05	0.00688
cation homeostasis (GO:0055080)	733	37	17.7	2.09	4.83e-05	0.00699
mitochondrion organization (GO:0007005)	426	26	10.29	2.53	4.91e-05	0.00703
cation transport (GO:0006812)	736	37	17.77	2.08	5.09e-05	0.0071
microtubule-based process (GO:0007017)	785	39	18.96	2.06	5.08e-05	0.00715
vesicle-mediated transport in synapse (GO:0099003)	135	13	3.26	3.99	5.06e-05	0.00719
G protein-coupled receptor signaling pathway (GO:0007186)	1821	20	43.98	0.45	5.46e-05	0.00741
cellular cation homeostasis (GO:0030003)	654	34	15.79	2.15	5.45e-05	0.00746
ribonucleoside triphosphate biosynthetic process (GO:0009201)	49	8	1.18	6.76	5.43e-05	0.0075
positive regulation of transport (GO:0051050)	1060	48	25.6	1.88	5.99e-05	0.00807
export from cell (GO:0140352)	438	26	10.58	2.46	6.12e-05	0.00817
regulation of cardiac muscle contraction by calcium ion signaling (GO:0010882)	14	5	0.34	14.79	6.33e-05	0.00837
regulation of exocytosis (GO:0017157)	248	18	5.99	3.01	6.7e-05	0.00879
purine nucleotide metabolic process (GO:0006163)	296	20	7.15	2.8	6.85e-05	0.00891
regulated exocytosis (GO:0045055)	140	13	3.38	3.85	7.14e-05	0.00922
purine ribonucleotide biosynthetic process (GO:0009152)	122	12	2.95	4.07	8.12e-05	0.0104
mitochondrial transmembrane transport (GO:1990542)	85	10	2.05	4.87	8.2e-05	0.0104
ribose phosphate biosynthetic process (GO:0046390)	143	13	3.45	3.76	8.71e-05	0.011
regulation of cellular protein localization (GO:1903827)	562	30	13.57	2.21	9.01e-05	0.0113
synaptic vesicle cycle (GO:0099504)	124	12	2.99	4.01	9.37e-05	0.0116
regulation of striated muscle contraction (GO:0006942)	88	10	2.13	4.71	0.000107	0.0131
regulation of protein stability (GO:0031647)	307	20	7.41	2.7	0.000109	0.0133
ribosomal large subunit biogenesis (GO:0042273)	71	9	1.71	5.25	0.000111	0.0134
protein stabilization (GO:0050821)	190	15	4.59	3.27	0.000113	0.0135
mitochondrial transport (GO:0006839)	190	15	4.59	3.27	0.000113	0.0136
regulation of blood circulation (GO:1903522)	260	18	6.28	2.87	0.000117	0.0139
establishment of organelle localization (GO:0051656)	361	22	8.72	2.52	0.000125	0.0147
regulation of calcium ion transport (GO:0051924)	286	19	6.91	2.75	0.000127	0.0148
establishment of protein localization (GO:0045184)	1232	52	29.75	1.75	0.000136	0.0158
synaptic vesicle exocytosis (GO:0016079)	57	8	1.38	5.81	0.000141	0.0162
nucleoside triphosphate metabolic process (GO:0009141)	92	10	2.22	4.5	0.000149	0.017
neurotransmitter transport (GO:0006836)	131	12	3.16	3.79	0.000151	0.0171
regulation of calcium ion transmembrane transport (GO:1903169)	174	14	4.2	3.33	0.000158	0.0177
purine nucleotide biosynthetic process (GO:0006164)	132	12	3.19	3.76	0.000161	0.018
purine-containing compound metabolic process (GO:0072521)	317	20	7.66	2.61	0.000164	0.0181
regulation of intrinsic apoptotic signaling pathway (GO:2001242)	175	14	4.23	3.31	0.000167	0.0183
muscle system process (GO:0003012)	246	17	5.94	2.86	0.000184	0.0201
vesicle-mediated transport (GO:0016192)	1370	56	33.08	1.69	0.000192	0.0209
nucleoside triphosphate biosynthetic process (GO:0009142)	60	8	1.45	5.52	0.000194	0.0209
membrane docking (GO:0022406)	78	9	1.88	4.78	0.000211	0.0225
organic cyclic compound metabolic process (GO:1901360)	2656	94	64.14	1.47	0.000211	0.0226
heterocycle metabolic process (GO:0046483)	2344	85	56.61	1.5	0.000215	0.0228
locomotory behavior (GO:0007626)	250	17	6.04	2.82	0.00022	0.0231
axo-dendritic transport (GO:0008088)	79	9	1.91	4.72	0.000231	0.0237
regulation of calcium-mediated signaling (GO:0050848)	79	9	1.91	4.72	0.000231	0.0239
protein transport (GO:0015031)	1129	48	27.26	1.76	0.000229	0.0239
purine-containing compound biosynthetic process (GO:0072522)	138	12	3.33	3.6	0.000237	0.0242
positive regulation of cell death (GO:0010942)	682	33	16.47	2	0.000241	0.0245
synaptic vesicle priming (GO:0016082)	20	5	0.48	10.35	0.000257	0.0258
regulation of transmembrane transport (GO:0034762)	598	30	14.44	2.08	0.00026	0.0259
negative regulation of amyloid-beta formation (GO:1902430)	20	5	0.48	10.35	0.000257	0.026
vesicle-mediated transport to the plasma membrane (GO:0098876)	119	11	2.87	3.83	0.000263	0.026
behavior (GO:0007610)	703	34	16.98	2	0.00027	0.0266
positive regulation of organelle organization (GO:0010638)	601	30	14.51	2.07	0.000277	0.0271
nucleotide metabolic process (GO:0009117)	375	22	9.06	2.43	0.000279	0.0271
regulation of cation transmembrane transport (GO:1904062)	376	22	9.08	2.42	0.000285	0.0275
positive regulation of cellular component organization (GO:0051130)	1237	51	29.87	1.71	0.000293	0.0281
gene expression (GO:0010467)	2061	76	49.77	1.53	0.000299	0.0284
organophosphate biosynthetic process (GO:0090407)	409	23	9.88	2.33	0.000298	0.0285
response to organonitrogen compound (GO:0010243)	772	36	18.64	1.93	0.000321	0.0303
regulation of protein polymerization (GO:0032271)	235	16	5.68	2.82	0.000329	0.0309
regulation of molecular function (GO:0065009)	2522	89	60.91	1.46	0.000342	0.0317
nucleoside phosphate metabolic process (GO:0006753)	384	22	9.27	2.37	0.000341	0.0318
nervous system development (GO:0007399)	2114	77	51.05	1.51	0.000358	0.033
regulation of ion transmembrane transport (GO:0034765)	497	26	12	2.17	0.000365	0.0334
mitochondrial membrane organization (GO:0007006)	104	10	2.51	3.98	0.000371	0.0338
protein-containing complex localization (GO:0031503)	214	15	5.17	2.9	0.000376	0.0338
negative regulation of calcium-mediated signaling (GO:0050849)	22	5	0.53	9.41	0.000376	0.034
secretion by cell (GO:0032940)	391	22	9.44	2.33	0.000407	0.0365
positive regulation of cellular process (GO:0048522)	5825	178	140.67	1.27	0.000411	0.0366
negative regulation of amyloid precursor protein catabolic process (GO:1902992)	23	5	0.56	9	0.000449	0.0391
sodium ion export across plasma membrane (GO:0036376)	12	4	0.29	13.8	0.000444	0.0391
cellular sodium ion homeostasis (GO:0006883)	23	5	0.56	9	0.000449	0.0393
mitochondrial electron transport, cytochrome c to oxygen (GO:0006123)	12	4	0.29	13.8	0.000444	0.0393
macromolecule metabolic process (GO:0043170)	5460	168	131.86	1.27	0.000458	0.0395
cellular aromatic compound metabolic process (GO:0006725)	2429	86	58.66	1.47	0.000461	0.0395
adult locomotory behavior (GO:0008344)	107	10	2.58	3.87	0.000457	0.0396
vesicle fusion (GO:0006906)	88	9	2.13	4.23	0.000479	0.0408
transmembrane transport (GO:0055085)	937	41	22.63	1.81	0.000485	0.0411
response to nitrogen compound (GO:1901698)	883	39	21.32	1.83	0.000504	0.0424
negative regulation of cellular process (GO:0048523)	4932	154	119.11	1.29	0.000513	0.043
regulation of transporter activity (GO:0032409)	297	18	7.17	2.51	0.000536	0.0447
sensory perception (GO:0007600)	1647	20	39.77	0.5	0.000558	0.0463
dendritic transport (GO:0098935)	13	4	0.31	12.74	0.00057	0.047
exocytic process (GO:0140029)	72	8	1.74	4.6	0.000593	0.0487
mitochondrial respiratory chain complex assembly (GO:0033108)	91	9	2.2	4.1	0.000599	0.0489

## Sheet: Specific
GO biological process complete	FDR adjusted p-value
ATP metabolic process (GO:0046034)	7.51e-10
cellular nitrogen compound metabolic process (GO:0034641)	6.11e-09
oxidative phosphorylation (GO:0006119)	1.8e-08
establishment of localization in cell (GO:0051649)	4.25e-08
cellular nitrogen compound biosynthetic process (GO:0044271)	6.64e-08
transport (GO:0006810)	7.67e-08
cellular respiration (GO:0045333)	1.05e-07
establishment of localization (GO:0051234)	1.35e-07
cellular component biogenesis (GO:0044085)	1.38e-07
proton transmembrane transport (GO:1902600)	1.46e-07
aerobic respiration (GO:0009060)	4.54e-07
cellular localization (GO:0051641)	4.54e-07
cytoplasmic translation (GO:0002181)	6.17e-07
protein-containing complex assembly (GO:0065003)	1.29e-06
cellular component organization or biogenesis (GO:0071840)	1.34e-06
protein-containing complex subunit organization (GO:0043933)	1.37e-06
nitrogen compound metabolic process (GO:0006807)	1.52e-06
regulation of transport (GO:0051049)	2.04e-06
