# Supplementary material for: Probing regenerative heterogeneity of corticospinal neurons with scRNA-Seq
Source: Research Square preprint supplement (doi:10.21203/rs.3.rs-2588274/v1), 2023-02-21
Supplement: Supplementary file 8 [file e2f1169f2c0708dcedb9dcd9.xlsx]

## Sheet: Sheet1
	FDR_E12_3_day_IP_vs_naive_adult_3_IP	FDR_E12_1_week_IP_vs_naive_adult_3_IP	FDR_E12_2_week_IP_vs_naive_adult_3_IP	E12 VS IP SUM	FDR_naive_3_days_IP_vs_naive_adult_3_IP	FDR_naive_1_week_IP_vs_naive_adult_3_IP	FDR_naive_2_weeks_IP_vs_naive_adult_3_IP	Naïve VS IP SUM
DEseq	96	49	91	236	51	40	5	96
EdgeR	902	430	843	2175	437	310	65	812
Total	2315	1171	2222	5708	1229	813	186	2228
% DESEQ	4.14687	4.18446	4.09541	4.13455	4.14972	4.92005	2.68817	4.3088
% EdgeR	38.9633	36.7208	37.9388	38.1044	35.5574	38.1304	34.9462	36.4452
% EdgeR from My data	11.6372	5.54767	10.876	28.0609	5.63798	3.99948	0.838601	10.4761
