# Supplementary material for: Probing regenerative heterogeneity of corticospinal neurons with scRNA-Seq
Source: Research Square preprint supplement (doi:10.21203/rs.3.rs-2588274/v1), 2023-02-21
Supplement: Supplementary file 9 [file e8e195d85e01f896c39f040e.xlsx]

## Sheet: 5A. Overexpression
Enzemble	external_gene_name	logFC	logCPM	PValue	FDR
ENSMUSG00000000861.15	Bcl11a	6.37078	6.77489	1.38795e-52	7.08507e-48
ENSMUSG00000022808.5	Snx4	7.96172	5.46909	5.27344e-44	1.34597e-39
ENSMUSG00000031214.13	Ophn1	5.03784	4.80582	2.6083e-40	3.32735e-36
ENSMUSG00000032977.9	Fam207a	5.73477	3.88497	3.25911e-40	3.32735e-36
ENSMUSG00000028568.16	Btf3l4	5.938	2.9748	2.89581e-40	3.32735e-36
ENSMUSG00000057143.15	Trim12c	6.36519	3.66979	7.59832e-40	6.46453e-36
ENSMUSG00000017485.11	Top2b	4.5066	4.07303	1.44044e-38	1.05043e-34
ENSMUSG00000037075.7	Rnf139	5.62728	3.22871	1.31214e-36	8.37261e-33
ENSMUSG00000021483.8	Cdk20	5.44266	4.17171	1.62749e-36	9.23096e-33
ENSMUSG00000035202.8	Lars2	3.73635	5.49391	2.66492e-36	1.36036e-32
ENSMUSG00000060073.9	Psma3	5.17436	4.27996	1.06454e-35	4.94012e-32
ENSMUSG00000042523.12	Dnal1	4.42139	2.90028	7.42667e-34	3.15924e-30
ENSMUSG00000031201.17	Brcc3	4.65825	3.7789	1.28191e-33	5.03367e-30
ENSMUSG00000028957.12	Per3	4.247	4.81795	2.69878e-33	9.84033e-30
ENSMUSG00000034402.3	Kcnh5	6.18036	4.90305	3.25557e-33	1.10791e-29
ENSMUSG00000056770.15	Setd3	4.85075	2.66345	5.84699e-32	1.86545e-28
ENSMUSG00000048612.16	Myof	3.65009	2.93374	1.09581e-29	3.29047e-26
ENSMUSG00000029672.16	Fam3c	4.51719	2.71217	3.46059e-29	9.81404e-26
ENSMUSG00000021635.14	Rad17	3.88526	2.78226	4.97256e-29	1.33597e-25
ENSMUSG00000034732.4	Pabpc5	5.25039	2.1382	9.46651e-29	2.41618e-25
ENSMUSG00000086324.8	Gm15564	4.08386	3.96369	1.92072e-28	4.6689e-25
ENSMUSG00000086119.2	Gm2415	3.95446	2.10071	4.33821e-28	1.0066e-24
ENSMUSG00000091407.2	Vmn2r117	4.71304	3.2693	6.84002e-28	1.5181e-24
ENSMUSG00000110282.1	B930086L07Rik	4.21565	2.76048	7.50017e-28	1.59526e-24
ENSMUSG00000029833.17	Trim24	3.87853	4.05532	2.2502e-27	4.59464e-24
ENSMUSG00000107970.1	Gm49058	5.3439	2.32433	2.78481e-27	5.46755e-24
ENSMUSG00000030898.15	Cckbr	4.39121	1.60108	6.24876e-27	1.18141e-23
ENSMUSG00000032537.15	Ephb1	3.63098	2.53714	7.38472e-27	1.34631e-23
ENSMUSG00000082711.1	Gm12987	6.65748	3.12591	7.93108e-27	1.39606e-23
ENSMUSG00000002608.8	Ccdc97	4.14121	1.25602	1.2677e-26	2.15707e-23
ENSMUSG00000020205.8	Phlda1	5.01574	3.68353	1.80419e-26	2.97092e-23
ENSMUSG00000036764.12	Dnajc12	4.00747	2.497	1.90948e-26	3.03945e-23
ENSMUSG00000091930.2	Vmn2r52	4.29948	3.37798	4.24077e-26	6.36701e-23
ENSMUSG00000021556.12	Golm1	3.88539	2.19379	6.55754e-26	9.29841e-23
ENSMUSG00000028618.11	Tmem59	4.27823	2.02186	6.46358e-26	9.29841e-23
ENSMUSG00000002963.17	Pnkp	4.09421	1.69721	1.90477e-25	2.62792e-22
ENSMUSG00000109890.2	AU023762	4.21443	1.69845	3.28853e-25	4.41762e-22
ENSMUSG00000005312.15	Ubqln1	3.78687	2.43649	3.51567e-25	4.60165e-22
ENSMUSG00000108348.2	Gm42372	3.93278	2.3151	5.1069e-25	6.51729e-22
ENSMUSG00000040649.15	Rimklb	3.39447	2.05507	5.34374e-25	6.65322e-22
ENSMUSG00000088710.1	NA	5.58315	1.52918	6.41159e-25	7.79268e-22
ENSMUSG00000034744.13	Nagk	3.83202	3.63801	8.16909e-25	9.69786e-22
ENSMUSG00000020022.17	Ndufa12	4.73469	1.97354	8.76026e-25	1.01633e-21
ENSMUSG00000028692.14	Akr1a1	3.65149	3.08999	1.64913e-24	1.87074e-21
ENSMUSG00000037896.17	Rcor1	3.55218	1.94443	1.73646e-24	1.92699e-21
ENSMUSG00000037685.15	Atp8a1	3.28513	3.84355	1.91435e-24	2.07919e-21
ENSMUSG00000021694.18	Ercc8	3.50754	2.38048	3.48054e-24	3.64587e-21
ENSMUSG00000025092.6	Hspa12a	3.65917	2.28629	3.49967e-24	3.64587e-21
ENSMUSG00000103170.1	Gm37170	4.4074	1.93298	3.7605e-24	3.83925e-21
ENSMUSG00000080758.1	Gm5392	6.04032	3.35996	4.16826e-24	4.1721e-21
ENSMUSG00000039347.7	Atp6v0e2	4.70887	1.74347	4.66443e-24	4.57894e-21
ENSMUSG00000025428.15	Atp5a1	5.41927	2.46155	4.99733e-24	4.81319e-21
ENSMUSG00000028580.15	Pum1	3.64194	4.61356	5.30088e-24	4.96956e-21
ENSMUSG00000103521.1	Gm29730	5.27044	2.11521	5.35439e-24	4.96956e-21
ENSMUSG00000030428.16	Ttyh1	3.39596	3.5736	5.84392e-24	5.32705e-21
ENSMUSG00000056476.13	Med12l	2.90888	2.42091	7.57809e-24	6.78664e-21
ENSMUSG00000029229.8	Chic2	2.87182	2.83082	9.86522e-24	8.68258e-21
ENSMUSG00000055862.7	Izumo4	3.51593	3.0302	1.03408e-23	8.94691e-21
ENSMUSG00000060675.13	Plaat3	3.7565	2.23781	1.06406e-23	9.05285e-21
ENSMUSG00000103083.1	A630035G10Rik	3.83139	2.29851	1.46428e-23	1.22536e-20
ENSMUSG00000034892.8	Rps29	3.96363	2.28738	1.99506e-23	1.64261e-20
ENSMUSG00000001985.9	Grik3	3.16008	2.03795	2.63998e-23	2.1391e-20
ENSMUSG00000024248.14	Cox7a2l	4.91556	1.51862	2.84961e-23	2.27287e-20
ENSMUSG00000028086.15	Fbxw7	3.58172	3.62613	3.49183e-23	2.71579e-20
ENSMUSG00000002015.5	Bcap31	5.75523	1.74151	3.51131e-23	2.71579e-20
ENSMUSG00000036275.13	9530068E07Rik	4.09415	1.93953	5.08286e-23	3.81566e-20
ENSMUSG00000036231.5	Agr3	4.41937	2.79801	6.59305e-23	4.87761e-20
ENSMUSG00000018593.13	Sparc	3.47384	1.58889	8.36975e-23	6.10358e-20
ENSMUSG00000033900.13	Map9	3.25295	1.9645	9.74063e-23	7.00324e-20
ENSMUSG00000025952.15	Crygc	4.43217	0.798439	1.12898e-22	8.00429e-20
ENSMUSG00000058254.12	Tspan7	3.6847	3.95568	1.14912e-22	8.03549e-20
ENSMUSG00000025781.14	Atp5c1	3.61678	1.67111	1.21798e-22	8.4019e-20
ENSMUSG00000040296.15	Ddx58	3.27847	2.78404	1.34493e-22	9.15393e-20
ENSMUSG00000036983.7	Tfb1m	3.24693	1.02151	1.64368e-22	1.10401e-19
ENSMUSG00000044061.7	Olfr225	3.34549	1.50343	1.95232e-22	1.29428e-19
ENSMUSG00000081517.1	Gm16204	4.39742	2.04957	2.47641e-22	1.62068e-19
ENSMUSG00000002409.18	Dyrk1b	3.51236	1.26779	2.72673e-22	1.76191e-19
ENSMUSG00000034793.15	G6pc3	4.10988	2.02382	2.99598e-22	1.86507e-19
ENSMUSG00000081138.1	Gm12834	4.16509	1.23693	3.20822e-22	1.97313e-19
ENSMUSG00000041716.7	Gm20604	4.65073	2.02866	3.76731e-22	2.2894e-19
ENSMUSG00000027952.16	Pmvk	4.38211	1.44213	4.12044e-22	2.44577e-19
ENSMUSG00000044627.11	Swi5	3.11772	1.79852	4.30051e-22	2.52331e-19
ENSMUSG00000024538.7	Ppic	3.86544	1.89843	4.53027e-22	2.62792e-19
ENSMUSG00000078653.4	Cntd1	3.09456	1.90398	4.98331e-22	2.85823e-19
ENSMUSG00000036810.16	Cnep1r1	3.64794	1.93538	6.49256e-22	3.68251e-19
ENSMUSG00000022757.19	Tfg	3.91902	1.37681	7.83683e-22	4.39611e-19
ENSMUSG00000015357.10	Clpx	3.65026	1.39227	8.64906e-22	4.79901e-19
ENSMUSG00000020807.14	4933427D14Rik	3.31176	1.65217	9.74259e-22	5.34764e-19
ENSMUSG00000028622.11	Mrpl37	3.34897	1.40402	1.21652e-21	6.46871e-19
ENSMUSG00000032336.17	Nptn	3.10221	2.82615	1.23439e-21	6.49605e-19
ENSMUSG00000030500.6	Slc17a6	3.32896	2.36555	1.39624e-21	7.27286e-19
ENSMUSG00000019998.6	Stx7	3.46225	1.68963	1.46396e-21	7.54855e-19
ENSMUSG00000033352.11	Map2k4	3.35385	1.95387	1.62504e-21	8.29536e-19
ENSMUSG00000101935.1	Gm17748	5.7375	2.39299	1.68159e-21	8.49901e-19
ENSMUSG00000039046.15	Usp6nl	3.42166	2.415	1.7838e-21	8.92721e-19
ENSMUSG00000048047.3	Zbtb33	3.44075	1.28093	1.95858e-21	9.61344e-19
ENSMUSG00000073411.11	H2-D1	4.05191	0.906176	2.63581e-21	1.26934e-18
ENSMUSG00000045812.5	Olfr984	3.83806	1.30882	2.94934e-21	1.40705e-18
ENSMUSG00000097623.7	B230323A14Rik	3.64072	1.56219	3.00779e-21	1.40861e-18
ENSMUSG00000105935.1	Gm43628	4.47359	1.31159	2.98468e-21	1.40861e-18
ENSMUSG00000075703.15	Selenoi	2.68809	2.72809	3.24249e-21	1.50472e-18
ENSMUSG00000106973.1	Gm43415	4.05437	1.17504	3.27598e-21	1.50656e-18
ENSMUSG00000049252.17	Lrp1b	2.64939	3.60649	3.33677e-21	1.52082e-18
ENSMUSG00000027067.16	Ssrp1	3.67896	1.74008	3.91706e-21	1.75398e-18
ENSMUSG00000081442.1	Gm14682	4.59899	1.32934	4.31592e-21	1.91578e-18
ENSMUSG00000028937.14	Acot7	4.00293	2.27221	7.21037e-21	3.14588e-18
ENSMUSG00000040018.9	Cox15	4.84167	4.36842	8.57278e-21	3.7086e-18
ENSMUSG00000110163.1	Gm45389	3.92811	1.06644	9.35512e-21	4.01303e-18
ENSMUSG00000028195.4	Ccn1	3.35721	1.49767	9.44605e-21	4.01827e-18
ENSMUSG00000017195.15	Zpbp2	3.67826	1.86548	1.04363e-20	4.40284e-18
ENSMUSG00000102166.1	Gm36947	4.38058	2.26868	1.05643e-20	4.4203e-18
ENSMUSG00000020561.8	Polr1f	3.49192	1.897	1.97809e-20	8.12758e-18
ENSMUSG00000028443.6	Nudt2	4.39308	0.557264	1.99022e-20	8.12758e-18
ENSMUSG00000049354.8	Dcaf7	3.0425	1.76434	2.02036e-20	8.18518e-18
ENSMUSG00000019837.8	Gtf3c6	4.18866	1.34813	2.09816e-20	8.43346e-18
ENSMUSG00000059873.4	Olfr1029	3.97365	1.74835	2.42515e-20	9.6716e-18
ENSMUSG00000027570.15	Col9a3	3.40407	2.14098	2.86515e-20	1.125e-17
ENSMUSG00000086978.1	4933435F18Rik	3.87794	2.06753	2.88704e-20	1.125e-17
ENSMUSG00000081046.1	Gm12846	3.81623	1.53655	3.25014e-20	1.25689e-17
ENSMUSG00000087995.1	Gm25054	5.28938	1.11323	3.87012e-20	1.4854e-17
ENSMUSG00000054580.14	Pla2r1	2.70859	2.50767	3.97637e-20	1.51479e-17
ENSMUSG00000020300.14	Cpeb4	2.94994	2.58772	4.03789e-20	1.52683e-17
ENSMUSG00000031647.10	Mfap3l	2.98218	1.08956	6.2972e-20	2.34637e-17
ENSMUSG00000024242.15	Map4k3	2.70154	2.78925	6.60167e-20	2.442e-17
ENSMUSG00000061039.5	Olfr920	3.39943	2.32702	6.68255e-20	2.45413e-17
ENSMUSG00000107662.2	Olfr772	4.91639	2.6136	7.64382e-20	2.7871e-17
ENSMUSG00000062604.11	Srpk2	2.95107	3.82586	7.87265e-20	2.82246e-17
ENSMUSG00000111852.1	Gm33180	3.7913	1.22346	7.86324e-20	2.82246e-17
ENSMUSG00000009013.5	Dynll1	3.13288	3.6793	8.02763e-20	2.84574e-17
ENSMUSG00000038525.16	Armc10	3.86091	1.9067	9.01422e-20	3.15171e-17
ENSMUSG00000024740.9	Ddb1	2.80095	1.15439	1.02531e-19	3.51267e-17
ENSMUSG00000031029.6	Eif3f	4.06233	3.00352	1.02217e-19	3.51267e-17
ENSMUSG00000060377.4	Rpl36a-ps1	4.5653	0.710706	1.06782e-19	3.60987e-17
ENSMUSG00000026384.13	Ptpn4	2.98398	2.82226	1.19617e-19	4.01717e-17
ENSMUSG00000031709.15	Tbc1d9	3.44679	2.50295	1.40036e-19	4.64182e-17
ENSMUSG00000028826.14	Maco1	2.7668	1.81522	1.44796e-19	4.76863e-17
ENSMUSG00000044894.14	Uqcrq	3.61213	1.37715	1.84329e-19	5.99327e-17
ENSMUSG00000025920.19	Stau2	2.67121	2.19087	1.88612e-19	6.09372e-17
ENSMUSG00000034192.5	Lsm3	2.77737	1.22088	2.21536e-19	7.06797e-17
ENSMUSG00000053626.5	Tll1	2.89201	2.21068	2.29722e-19	7.2836e-17
ENSMUSG00000020661.15	Dnmt3a	2.51656	2.90159	2.46296e-19	7.76091e-17
ENSMUSG00000082965.1	Gm6754	4.67875	1.25176	2.52735e-19	7.91496e-17
ENSMUSG00000039105.6	Atp6v1g1	4.07022	1.28671	2.54377e-19	7.91779e-17
ENSMUSG00000100405.1	Gm28911	5.20684	0.767704	2.75099e-19	8.5109e-17
ENSMUSG00000097620.7	4921514A10Rik	3.57252	1.74307	3.63349e-19	1.11065e-16
ENSMUSG00000028756.12	Pink1	3.32807	1.53445	3.86832e-19	1.17539e-16
ENSMUSG00000067279.2	Ppp1r3c	3.8697	1.16085	4.22216e-19	1.27532e-16
ENSMUSG00000038462.3	Uqcrfs1	4.48099	2.94327	4.24964e-19	1.27607e-16
ENSMUSG00000029086.15	Prom1	2.50729	1.7424	4.68217e-19	1.39772e-16
ENSMUSG00000027350.8	Chgb	3.207	2.58235	4.76657e-19	1.41465e-16
ENSMUSG00000021905.14	Dph3	3.29578	1.17428	4.90769e-19	1.44811e-16
ENSMUSG00000030165.16	Klrd1	4.35839	0.986485	5.02899e-19	1.47537e-16
ENSMUSG00000015994.10	Fnta	3.29677	2.44279	5.34216e-19	1.54816e-16
ENSMUSG00000060152.14	Pop5	3.65104	1.41522	5.36806e-19	1.54816e-16
ENSMUSG00000049800.13	Sertad2	2.88267	2.05143	5.60476e-19	1.60734e-16
ENSMUSG00000099459.2	Gm28556	5.04732	0.932426	5.71027e-19	1.62845e-16
ENSMUSG00000022353.10	Mtss1	2.48912	2.54056	6.31857e-19	1.79191e-16
ENSMUSG00000021731.10	Mrps30	3.50979	2.2791	6.52867e-19	1.84127e-16
ENSMUSG00000031105.16	Slc25a14	4.12701	2.50355	7.05195e-19	1.97792e-16
ENSMUSG00000031422.16	Morf4l2	3.31854	2.13819	7.36882e-19	2.0555e-16
ENSMUSG00000041777.12	Cir1	3.14827	1.39393	7.79052e-19	2.14964e-16
ENSMUSG00000042406.8	Atf4	3.61412	2.11113	8.91762e-19	2.44741e-16
ENSMUSG00000002477.5	Snrpd1	3.79591	1.21462	9.79181e-19	2.65874e-16
ENSMUSG00000056959.6	Olfr315	3.32977	0.996856	1.0216e-18	2.75924e-16
ENSMUSG00000021671.9	Poc5	2.67398	1.18378	1.29611e-18	3.464e-16
ENSMUSG00000019505.7	Ubb	4.12066	2.62851	1.30779e-18	3.47702e-16
ENSMUSG00000021254.9	Gpatch2l	2.80008	1.24605	1.37168e-18	3.62797e-16
ENSMUSG00000031176.8	Dynlt3	3.94564	2.4083	1.53589e-18	4.02066e-16
ENSMUSG00000059851.15	Kmt5c	3.28621	4.57955	1.77731e-18	4.62889e-16
ENSMUSG00000032532.7	Cck	3.69744	2.89967	2.22402e-18	5.73382e-16
ENSMUSG00000079357.8	Gm11100	3.6918	2.12901	2.33162e-18	5.98103e-16
ENSMUSG00000010803.13	Gabra1	3.0156	2.56723	2.411e-18	6.15372e-16
ENSMUSG00000073295.4	Nudt11	2.55447	1.22496	2.58788e-18	6.50835e-16
ENSMUSG00000032353.9	Tmed3	3.15358	1.50806	2.58819e-18	6.50835e-16
ENSMUSG00000030682.4	Cdipt	3.80752	1.64216	2.7148e-18	6.79324e-16
ENSMUSG00000025060.14	Slk	2.55938	1.97057	3.0267e-18	7.53678e-16
ENSMUSG00000025410.10	Dctn2	3.35468	2.3642	3.08556e-18	7.64605e-16
ENSMUSG00000104460.1	Gm9121	5.78109	1.03175	3.87133e-18	9.50096e-16
ENSMUSG00000086587.7	Gm11837	3.18969	0.439958	3.90633e-18	9.54098e-16
ENSMUSG00000086841.1	2410006H16Rik	4.07767	0.433155	4.0173e-18	9.7653e-16
ENSMUSG00000104133.1	4921511E07Rik	4.01862	2.13579	4.05956e-18	9.82125e-16
ENSMUSG00000024750.10	Zfand5	2.87459	2.28451	4.3987e-18	1.05418e-15
ENSMUSG00000022564.7	Grina	3.59299	1.57983	4.46002e-18	1.06388e-15
ENSMUSG00000025521.15	Tmem192	3.103	1.60297	5.12002e-18	1.21564e-15
ENSMUSG00000112302.1	Gm48226	3.24366	2.77506	5.64305e-18	1.32747e-15
ENSMUSG00000116768.1	Gm18269	4.4978	1.63178	5.76044e-18	1.34887e-15
ENSMUSG00000029103.16	Lrpap1	3.14094	0.95226	5.90446e-18	1.37628e-15
ENSMUSG00000025983.11	Ccdc150	2.95343	1.7858	5.94577e-18	1.37961e-15
ENSMUSG00000053046.16	Brsk2	3.25373	2.82944	6.20793e-18	1.43392e-15
ENSMUSG00000032440.13	Tgfbr2	2.7232	1.85357	7.19424e-18	1.65394e-15
ENSMUSG00000081188.1	Gm14621	4.99377	0.574254	7.49636e-18	1.70833e-15
ENSMUSG00000104540.1	Gm3527	4.23662	1.72802	7.77848e-18	1.76475e-15
ENSMUSG00000056204.8	Pgpep1	2.54006	0.957063	7.8465e-18	1.7723e-15
ENSMUSG00000077204.1	Gm25610	4.66547	0.515477	8.30236e-18	1.86701e-15
ENSMUSG00000020717.19	Pecam1	2.537	2.52416	9.42825e-18	2.11089e-15
ENSMUSG00000109109.1	Gm44953	4.22753	0.826681	1.01495e-17	2.26245e-15
ENSMUSG00000048040.8	Arxes2	4.52945	0.565222	1.05e-17	2.3304e-15
ENSMUSG00000113222.1	Gm48557	4.24116	1.72069	1.08004e-17	2.38671e-15
ENSMUSG00000046949.16	Nqo2	3.22931	0.882968	1.13201e-17	2.49077e-15
ENSMUSG00000097742.1	Gm26535	3.35099	0.657291	1.17806e-17	2.56994e-15
ENSMUSG00000028330.8	Ncbp1	2.63631	1.11843	1.38088e-17	2.98686e-15
ENSMUSG00000111971.1	Gm48678	2.96241	1.03211	1.39512e-17	3.00493e-15
ENSMUSG00000090081.1	Gm16587	4.37067	1.61121	1.41775e-17	3.04084e-15
ENSMUSG00000037017.15	Zscan21	2.86494	0.363306	1.51421e-17	3.23413e-15
ENSMUSG00000053134.13	Supt7l	2.80687	1.95701	1.54223e-17	3.28025e-15
ENSMUSG00000027242.14	Wdr76	2.60452	1.51428	1.67642e-17	3.55089e-15
ENSMUSG00000074873.3	NA	3.11191	0.489809	1.87525e-17	3.93934e-15
ENSMUSG00000052459.13	Atp6v1a	2.86995	3.68388	1.93933e-17	4.05726e-15
ENSMUSG00000003970.9	Rpl8	3.22179	1.59157	1.9781e-17	4.12148e-15
ENSMUSG00000100252.6	Mir124-2hg	2.32567	1.62081	2.00403e-17	4.15853e-15
ENSMUSG00000097443.2	Gm17529	2.68757	1.32596	2.2917e-17	4.69817e-15
ENSMUSG00000020150.13	Gamt	3.74523	1.17216	2.52644e-17	5.13814e-15
ENSMUSG00000071172.13	Srsf3	2.61916	2.17679	2.59103e-17	5.24859e-15
ENSMUSG00000067545.3	Olfr1419	3.04815	0.812812	2.81928e-17	5.66598e-15
ENSMUSG00000116081.1	Gm49593	3.8964	0.816529	2.81489e-17	5.66598e-15
ENSMUSG00000017421.18	Zfp207	2.30989	2.22685	2.89689e-17	5.77647e-15
ENSMUSG00000045515.3	Pou3f3	2.31374	2.05087	3.07302e-17	6.10384e-15
ENSMUSG00000031066.10	Usp11	2.88524	1.4304	3.19458e-17	6.32069e-15
ENSMUSG00000028780.13	Sema3c	2.90241	2.55031	3.37456e-17	6.65101e-15
ENSMUSG00000031224.6	Magee2	3.38564	1.03325	3.45148e-17	6.77646e-15
ENSMUSG00000027665.13	Pik3ca	2.58264	2.4409	3.49886e-17	6.81704e-15
ENSMUSG00000019951.10	Uhrf1bp1l	2.78395	2.54484	3.48854e-17	6.81704e-15
ENSMUSG00000109251.1	E230032D23Rik	3.74652	1.61157	3.63881e-17	7.06275e-15
ENSMUSG00000110164.1	Gm7351	3.96331	0.750912	4.83604e-17	9.2459e-15
ENSMUSG00000026463.17	Atp2b4	2.36793	2.42012	5.72508e-17	1.08519e-14
ENSMUSG00000020955.9	Ap4s1	3.41374	0.677302	5.8063e-17	1.09371e-14
ENSMUSG00000097546.1	Gm26749	3.82683	1.96923	5.89181e-17	1.10573e-14
ENSMUSG00000037032.16	Apbb1	2.66063	1.20399	6.19502e-17	1.14995e-14
ENSMUSG00000115375.1	Gm49039	4.68265	0.498042	6.17736e-17	1.14995e-14
ENSMUSG00000039982.7	Dtx4	2.50161	1.00958	7.00226e-17	1.29509e-14
ENSMUSG00000102653.1	Gm37079	3.67517	2.12237	7.33048e-17	1.3509e-14
ENSMUSG00000049225.14	Pdp1	2.80568	2.71802	8.11016e-17	1.48921e-14
ENSMUSG00000007415.15	Gatad1	2.55708	1.50514	8.50942e-17	1.55692e-14
ENSMUSG00000108325.1	Gm44898	3.92219	0.965252	8.58053e-17	1.56432e-14
ENSMUSG00000038065.13	Mturn	2.68089	0.985055	9.61859e-17	1.74114e-14
ENSMUSG00000019158.9	Tmem160	3.05318	0.415699	9.65489e-17	1.74153e-14
ENSMUSG00000031818.12	Cox4i1	3.30485	2.3029	1.00725e-16	1.81045e-14
ENSMUSG00000079557.11	Marchf2	2.81649	1.81746	1.04787e-16	1.87686e-14
ENSMUSG00000117175.1	Gm20098	3.23536	0.974758	1.06629e-16	1.90317e-14
ENSMUSG00000113761.1	Gm4263	3.60822	0.944287	1.08791e-16	1.93499e-14
ENSMUSG00000106103.1	Gm43081	3.81747	1.84703	1.11534e-16	1.97689e-14
ENSMUSG00000014504.16	Srp19	2.8171	1.00363	1.14457e-16	2.02169e-14
ENSMUSG00000024747.3	Aldh1a7	3.48791	1.14396	1.14959e-16	2.02356e-14
ENSMUSG00000027220.2	Syt13	2.87879	2.91367	1.1861e-16	2.08064e-14
ENSMUSG00000083561.3	Gm5942	4.36791	0.74846	1.21954e-16	2.13197e-14
ENSMUSG00000030036.8	Mogs	3.18241	1.69032	1.45668e-16	2.52065e-14
ENSMUSG00000050978.3	Gm5215	3.64496	0.602607	1.48844e-16	2.5669e-14
ENSMUSG00000023572.16	Ccndbp1	2.83631	0.925152	1.79245e-16	3.06017e-14
ENSMUSG00000022234.15	Cct5	3.09646	0.831666	2.07423e-16	3.51771e-14
ENSMUSG00000024726.9	Carnmt1	2.97768	1.11908	2.08399e-16	3.52256e-14
ENSMUSG00000116079.1	Gm36245	3.79209	0.136809	2.29491e-16	3.86628e-14
ENSMUSG00000110206.1	Flt3l	2.8474	0.992143	2.67911e-16	4.4693e-14
ENSMUSG00000084140.1	Gm14000	4.5562	0.86917	2.69971e-16	4.489e-14
ENSMUSG00000097362.1	Gm26544	2.93979	0.678044	2.856e-16	4.71813e-14
ENSMUSG00000022174.8	Dad1	2.74672	0.959142	3.34712e-16	5.51163e-14
ENSMUSG00000022658.10	Tagln3	3.89371	1.27026	3.74939e-16	6.09538e-14
ENSMUSG00000034850.15	Tmem127	3.01191	2.37077	3.97435e-16	6.44059e-14
ENSMUSG00000058569.8	Tmed9	2.76301	2.24528	4.17608e-16	6.74609e-14
ENSMUSG00000034820.3	Cpsf7	2.97017	0.678701	4.80652e-16	7.71567e-14
ENSMUSG00000053332.13	Gas5	3.21082	1.43869	4.87106e-16	7.79476e-14
ENSMUSG00000016382.15	Pls3	2.59474	1.06995	5.11659e-16	8.16207e-14
ENSMUSG00000030763.7	Lcmt1	2.93961	1.00933	5.74675e-16	9.13877e-14
ENSMUSG00000052825.6	Gm9892	3.65303	1.82668	6.33938e-16	9.95712e-14
ENSMUSG00000110700.1	Gm5357	3.43442	1.66306	6.54069e-16	1.02418e-13
ENSMUSG00000116013.1	C87114	3.83162	0.206994	6.94265e-16	1.0838e-13
ENSMUSG00000117610.1	Gm50054	4.32243	0.289567	7.32313e-16	1.1392e-13
ENSMUSG00000044350.14	Lacc1	3.07349	2.07161	7.9101e-16	1.2199e-13
ENSMUSG00000003813.15	Rad23a	2.64151	0.647114	8.48534e-16	1.30467e-13
ENSMUSG00000103492.1	Gm37412	3.41309	2.05905	8.81288e-16	1.35096e-13
ENSMUSG00000026664.7	Phyh	3.03512	0.919803	9.85693e-16	1.50649e-13
ENSMUSG00000116031.1	D030024E09Rik	2.98072	1.23051	9.90482e-16	1.50929e-13
ENSMUSG00000115691.1	Gm48914	3.09144	1.06083	1.01993e-15	1.54953e-13
ENSMUSG00000010607.8	Pigyl	3.45501	0.19589	1.02619e-15	1.55442e-13
ENSMUSG00000070476.10	Fam217b	2.63366	1.7118	1.047e-15	1.57195e-13
ENSMUSG00000058833.11	Rex1bd	2.55224	0.451784	1.0879e-15	1.62857e-13
ENSMUSG00000092187.1	Gm20457	3.59117	0.25324	1.09123e-15	1.62877e-13
ENSMUSG00000060126.14	Tpt1	2.63802	5.71843	1.10644e-15	1.64666e-13
ENSMUSG00000099801.1	Gm29011	3.09448	1.61647	1.21307e-15	1.79489e-13
ENSMUSG00000040548.16	Tex2	2.54171	1.10707	1.22524e-15	1.80766e-13
ENSMUSG00000004849.14	Ap1s1	2.99238	1.34168	1.28121e-15	1.87398e-13
ENSMUSG00000026739.13	Bmi1	2.47408	0.935932	1.38184e-15	2.0154e-13
ENSMUSG00000082583.2	Olfr336-ps1	4.15267	0.176343	1.41434e-15	2.05692e-13
ENSMUSG00000031616.7	Ednra	2.27113	1.17099	1.45867e-15	2.10379e-13
ENSMUSG00000002767.13	Mrpl2	3.1096	1.49406	1.45893e-15	2.10379e-13
ENSMUSG00000058388.14	Phtf1	2.33053	1.52193	1.49183e-15	2.14517e-13
ENSMUSG00000021242.9	Npc2	2.42418	1.52466	1.59619e-15	2.28879e-13
ENSMUSG00000025932.14	Eya1	2.5354	1.87658	1.64471e-15	2.35175e-13
ENSMUSG00000116056.1	Gm4544	3.58329	1.13858	1.74954e-15	2.48079e-13
ENSMUSG00000022620.14	Arsa	2.65909	1.02258	1.75954e-15	2.48807e-13
ENSMUSG00000021051.10	Ppp2r5e	2.4203	1.66702	1.78036e-15	2.50363e-13
ENSMUSG00000105572.1	Gm43300	3.11347	0.257996	1.8863e-15	2.63808e-13
ENSMUSG00000115651.1	Gm7595	3.65137	0.590786	1.90529e-15	2.65736e-13
ENSMUSG00000033788.15	Dysf	2.38534	1.91209	2.17011e-15	3.01026e-13
ENSMUSG00000008136.14	Fhl2	3.07863	0.965061	2.20285e-15	3.04739e-13
ENSMUSG00000102601.1	Ighv3-7	4.0067	0.295488	2.27429e-15	3.12927e-13
ENSMUSG00000113309.1	Gm48408	3.85704	0.629533	2.31556e-15	3.17749e-13
ENSMUSG00000023286.16	Ube2j2	2.55023	0.914458	2.48135e-15	3.38142e-13
ENSMUSG00000038628.8	Polr3k	3.19293	0.259655	2.48405e-15	3.38142e-13
ENSMUSG00000052681.8	Rap1b	2.67839	1.45097	3.09348e-15	4.17759e-13
ENSMUSG00000033460.14	Armcx1	2.83415	0.58611	3.30117e-15	4.42582e-13
ENSMUSG00000085658.1	Gm15704	2.87181	0.443056	3.3033e-15	4.42582e-13
ENSMUSG00000001173.15	Ocrl	2.48503	2.63587	3.444e-15	4.60225e-13
ENSMUSG00000015090.13	Ptgds	2.88248	1.19029	3.79806e-15	5.06214e-13
ENSMUSG00000112270.1	Gm47613	4.01114	1.19529	4.39242e-15	5.7938e-13
ENSMUSG00000042148.8	Cox10	2.89875	1.95034	4.55857e-15	5.98204e-13
ENSMUSG00000040359.14	Ufl1	2.30468	0.972693	4.81637e-15	6.30413e-13
ENSMUSG00000030257.16	Srgap3	2.31398	2.05779	4.94919e-15	6.46142e-13
ENSMUSG00000115555.1	Gm49307	3.45855	0.979501	5.01304e-15	6.52808e-13
ENSMUSG00000037894.13	H2az1	3.21267	1.7012	5.1802e-15	6.7286e-13
ENSMUSG00000115238.1	Gm19236	2.29872	1.07754	5.1983e-15	6.73496e-13
ENSMUSG00000110120.1	Gm45251	3.34086	1.8754	5.52921e-15	7.09495e-13
ENSMUSG00000038650.15	Rnh1	2.68713	0.662807	5.55694e-15	7.1094e-13
ENSMUSG00000027480.12	Sun5	3.09964	0.139416	5.97568e-15	7.62601e-13
ENSMUSG00000036815.16	Dpp10	1.91817	1.98236	6.05322e-15	7.7057e-13
ENSMUSG00000080712.3	H2bu1-ps	3.41885	0.0414493	6.1625e-15	7.76734e-13
ENSMUSG00000030224.10	Strap	2.82833	1.53448	6.312e-15	7.93617e-13
ENSMUSG00000076757.9	Trgc4	4.06284	0.785374	6.52978e-15	8.16975e-13
ENSMUSG00000105264.1	Gm42716	3.32985	0.883001	6.60294e-15	8.24109e-13
ENSMUSG00000060639.5	H4c9	3.31988	0.277383	6.7997e-15	8.44536e-13
ENSMUSG00000028238.6	Atp6v0d2	2.81381	0.570713	7.23887e-15	8.94727e-13
ENSMUSG00000038900.17	Rpl12	2.90415	2.82819	7.3063e-15	9.00881e-13
ENSMUSG00000029255.8	Gnrhr	3.128	1.03129	8.05845e-15	9.86474e-13
ENSMUSG00000111111.1	Gm47037	2.92642	0.277112	8.34043e-15	1.01855e-12
ENSMUSG00000029208.16	Guf1	2.27843	1.39547	8.36574e-15	1.0192e-12
ENSMUSG00000016619.10	Nup50	2.71017	1.73594	8.84983e-15	1.07051e-12
ENSMUSG00000046432.12	Bex3	4.0292	1.86903	8.84004e-15	1.07051e-12
ENSMUSG00000061371.7	Zfp873	2.86825	0.826739	9.93195e-15	1.19766e-12
ENSMUSG00000024309.15	Pfdn6	3.18641	0.454191	9.94787e-15	1.19766e-12
ENSMUSG00000027257.13	Pacsin3	2.42524	1.52731	1.00545e-14	1.20486e-12
ENSMUSG00000031059.9	Ndufb11	3.73987	0.812142	1.00549e-14	1.20486e-12
ENSMUSG00000105975.4	Gm9831	2.43804	1.15599	1.02248e-14	1.22236e-12
ENSMUSG00000079451.9	Tmprss11g	2.67801	1.4985	1.03859e-14	1.23872e-12
ENSMUSG00000039990.16	Edrf1	2.64849	2.3404	1.11938e-14	1.33196e-12
ENSMUSG00000042671.12	Rgs8	2.79288	1.97926	1.17458e-14	1.39116e-12
ENSMUSG00000075105.3	Olfr1218	2.44892	0.343635	1.21237e-14	1.43119e-12
ENSMUSG00000070336.3	Fbxo47	2.52347	0.770159	1.21399e-14	1.43119e-12
ENSMUSG00000104852.1	Gm43201	2.63844	1.49512	1.23441e-14	1.44858e-12
ENSMUSG00000084399.2	Gm15666	3.02149	1.04136	1.2474e-14	1.46046e-12
ENSMUSG00000020743.15	Mif4gd	2.73722	0.340769	1.26938e-14	1.48279e-12
ENSMUSG00000029034.9	Ints11	2.86571	1.12782	1.34862e-14	1.56818e-12
ENSMUSG00000054302.15	Eapp	2.61473	1.09857	1.40225e-14	1.62684e-12
ENSMUSG00000073530.11	Pappa2	2.17252	1.35532	1.56742e-14	1.81023e-12
ENSMUSG00000057788.13	Ddx49	2.39294	1.16119	1.58764e-14	1.82945e-12
ENSMUSG00000089889.2	0610040B10Rik	2.7462	0.982056	1.65781e-14	1.90599e-12
ENSMUSG00000110901.1	Gm48393	2.48774	1.46693	1.68187e-14	1.92931e-12
ENSMUSG00000026473.15	Glul	2.6039	2.62636	1.72852e-14	1.97395e-12
ENSMUSG00000051515.9	Fam181b	2.62913	0.808145	1.7628e-14	1.99971e-12
ENSMUSG00000021124.13	Vti1b	2.81272	1.80194	1.76283e-14	1.99971e-12
ENSMUSG00000110651.1	Gm45770	3.36811	0.275217	1.75575e-14	1.99971e-12
ENSMUSG00000114613.1	Gm10732	3.05039	0.765251	1.94743e-14	2.19935e-12
ENSMUSG00000083684.1	Gm14034	4.02853	0.423417	2.00969e-14	2.26465e-12
ENSMUSG00000037735.7	2810032G03Rik	2.68964	1.29406	2.29241e-14	2.56063e-12
ENSMUSG00000021917.16	Spcs1	3.42943	1.63998	2.30298e-14	2.56681e-12
ENSMUSG00000042462.4	Dctpp1	3.02531	-0.0167536	2.59591e-14	2.88073e-12
ENSMUSG00000025647.16	Shisa5	2.55559	1.4577	2.60594e-14	2.88558e-12
ENSMUSG00000019948.4	Actr6	3.00618	1.15851	3.05048e-14	3.34877e-12
ENSMUSG00000031197.11	Vbp1	3.06635	1.28166	3.21674e-14	3.51617e-12
ENSMUSG00000037916.13	Ndufv1	2.61219	0.764944	3.31211e-14	3.61268e-12
ENSMUSG00000026112.7	Coa5	2.50505	1.45012	3.95517e-14	4.26849e-12
ENSMUSG00000033585.5	Ndn	3.3053	2.39073	4.21002e-14	4.53394e-12
ENSMUSG00000033161.10	Atp1a1	2.41251	1.24521	4.39971e-14	4.72826e-12
ENSMUSG00000105864.1	Gm10484	2.52323	0.802873	4.63201e-14	4.96744e-12
ENSMUSG00000095959.2	Gm10845	3.09391	0.550475	4.7828e-14	5.11839e-12
ENSMUSG00000028478.18	Clta	2.76988	2.03534	5.06908e-14	5.39846e-12
ENSMUSG00000098219.1	Gm7481	3.5174	0.249125	5.17225e-14	5.48915e-12
ENSMUSG00000025130.11	P4hb	2.26657	1.99764	5.82101e-14	6.16483e-12
ENSMUSG00000056822.4	Olfr166	2.60772	0.667255	5.86294e-14	6.19639e-12
ENSMUSG00000049760.6	Micos13	2.75064	0.985898	6.34014e-14	6.6731e-12
ENSMUSG00000115678.1	Gm49212	4.05233	0.972389	6.36242e-14	6.68277e-12
ENSMUSG00000084219.1	Gm14876	4.18633	0.471485	6.39469e-14	6.70287e-12
ENSMUSG00000027498.14	Cstf1	2.31687	0.717976	6.42435e-14	6.72016e-12
ENSMUSG00000014633.15	Cmc2	3.09945	1.98014	6.51951e-14	6.80576e-12
ENSMUSG00000062248.5	Cks2	3.29712	0.444305	6.59621e-14	6.87177e-12
ENSMUSG00000032182.15	Yipf2	2.70429	1.31497	6.66479e-14	6.92677e-12
ENSMUSG00000074867.4	Zfp808	3.10916	1.04697	6.67614e-14	6.92677e-12
ENSMUSG00000037638.5	Zbtb42	2.29957	0.511004	6.7161e-14	6.94147e-12
ENSMUSG00000080906.1	Gm12095	3.19502	-0.0792299	6.71751e-14	6.94147e-12
ENSMUSG00000033080.9	Vsx1	2.2108	0.968005	7.11951e-14	7.34201e-12
ENSMUSG00000072845.3	Tmprss11a	2.41716	1.60319	7.14762e-14	7.35614e-12
ENSMUSG00000025584.17	Pde8a	2.24104	1.52715	7.518e-14	7.70625e-12
ENSMUSG00000107758.1	Gm19253	3.64378	0.655976	7.9628e-14	8.14583e-12
ENSMUSG00000050711.7	Scg2	3.15748	1.79173	8.21312e-14	8.3851e-12
ENSMUSG00000047388.10	Atmin	2.3048	2.12857	8.40771e-14	8.56663e-12
ENSMUSG00000114553.1	Gm7644	2.7641	1.16884	9.31343e-14	9.47057e-12
ENSMUSG00000025794.9	Rpl14	3.00685	1.74654	1.0164e-13	1.02945e-11
ENSMUSG00000022551.8	Cyc1	2.52309	1.35356	1.07471e-13	1.08617e-11
ENSMUSG00000056692.13	Ilrun	2.3939	2.2841	1.11957e-13	1.12501e-11
ENSMUSG00000060240.12	Cend1	3.10808	1.08676	1.12994e-13	1.13321e-11
ENSMUSG00000015501.10	Hivep2	1.82957	2.14199	1.14373e-13	1.14478e-11
ENSMUSG00000032540.16	Abhd5	2.36178	1.55967	1.16652e-13	1.16531e-11
ENSMUSG00000067567.12	Hdac8	2.47586	1.64387	1.19087e-13	1.18731e-11
ENSMUSG00000022385.11	Gtse1	2.49759	0.755383	1.20012e-13	1.1942e-11
ENSMUSG00000008035.12	Mid1ip1	2.65569	0.66011	1.20659e-13	1.19831e-11
ENSMUSG00000039853.18	Trim14	2.15723	1.54189	1.26187e-13	1.25077e-11
ENSMUSG00000043430.5	Psapl1	2.63387	0.980677	1.27946e-13	1.26575e-11
ENSMUSG00000020917.17	Acly	2.09992	1.2726	1.30145e-13	1.28501e-11
ENSMUSG00000093877.4	Olfr1348	3.20673	1.62233	1.31231e-13	1.29324e-11
ENSMUSG00000016541.10	Atxn10	2.69356	0.84348	1.35834e-13	1.33601e-11
ENSMUSG00000028833.13	Ncdn	2.41405	1.50564	1.36193e-13	1.33697e-11
ENSMUSG00000042380.8	Smim12	3.24467	0.190631	1.45547e-13	1.42606e-11
ENSMUSG00000051095.7	Olfr986	2.86949	1.06692	1.55645e-13	1.51916e-11
ENSMUSG00000104448.1	Gm37256	3.63222	0.277265	1.57165e-13	1.53107e-11
ENSMUSG00000020612.16	Prkar1a	2.50718	3.34603	1.64305e-13	1.59758e-11
ENSMUSG00000110109.1	Gm5599	2.97534	0.728113	1.65059e-13	1.60186e-11
ENSMUSG00000033862.7	Cdk10	2.27744	0.50295	1.67648e-13	1.6239e-11
ENSMUSG00000031532.6	Saraf	2.16117	1.2151	1.68047e-13	1.62467e-11
ENSMUSG00000037509.20	Arhgef4	2.11522	2.05791	1.70713e-13	1.64733e-11
ENSMUSG00000037152.11	Ndufc1	2.74505	0.836539	1.72206e-13	1.6586e-11
ENSMUSG00000025151.16	Maged1	2.74406	2.00692	1.75501e-13	1.68715e-11
ENSMUSG00000060084.4	Olfr748	2.69132	0.837034	1.82151e-13	1.7478e-11
ENSMUSG00000039913.12	Pak5	2.4329	2.00936	1.82978e-13	1.75243e-11
ENSMUSG00000096448.2	Gm5808	3.59583	0.617371	1.83684e-13	1.7559e-11
ENSMUSG00000100389.1	Rbm6-ps2	2.75503	-0.113791	1.84588e-13	1.76124e-11
ENSMUSG00000082956.4	Naip3	2.90434	0.101275	1.95309e-13	1.8566e-11
ENSMUSG00000048027.8	Rgmb	2.12834	1.37499	2.03454e-13	1.93043e-11
ENSMUSG00000028188.13	Spata1	2.27377	1.62187	2.0715e-13	1.96185e-11
ENSMUSG00000024293.16	Esco1	2.32025	1.12677	2.10414e-13	1.98908e-11
ENSMUSG00000026895.7	Ndufa8	2.73841	0.351487	2.22166e-13	2.09628e-11
ENSMUSG00000109681.1	Gm17997	3.25171	0.378169	2.26427e-13	2.13255e-11
ENSMUSG00000110914.1	Gm48611	2.38	0.415132	2.29193e-13	2.15462e-11
ENSMUSG00000075040.9	Zfp408	2.86197	2.3036	2.41961e-13	2.26215e-11
ENSMUSG00000069184.4	Zfp72	2.59019	0.941314	2.44314e-13	2.27998e-11
ENSMUSG00000081865.1	Gm15484	2.49698	0.684416	2.62843e-13	2.44396e-11
ENSMUSG00000110699.1	Gm20946	4.18493	0.63543	2.69427e-13	2.50062e-11
ENSMUSG00000062224.6	4933411G06Rik	3.59552	0.760258	2.7253e-13	2.52484e-11
ENSMUSG00000020330.16	Hmmr	2.39585	1.79663	2.7671e-13	2.55892e-11
ENSMUSG00000030610.13	Det1	2.43936	1.38601	2.82917e-13	2.60687e-11
ENSMUSG00000081330.1	Gm13013	3.5844	0.524558	2.86993e-13	2.63967e-11
ENSMUSG00000077408.1	Gm25415	3.67146	0.0547404	2.92695e-13	2.68727e-11
ENSMUSG00000104986.1	1600023N17Rik	3.09054	0.103251	2.94552e-13	2.69946e-11
ENSMUSG00000021466.12	Ptch1	2.0369	2.80367	3.29241e-13	3.01197e-11
ENSMUSG00000030256.11	Bhlhe41	1.93802	0.983818	3.31385e-13	3.02616e-11
ENSMUSG00000089324.1	Mir1936	3.69852	-0.0767343	3.54233e-13	3.21754e-11
ENSMUSG00000024962.13	Vegfb	2.43195	1.45688	3.66154e-13	3.31991e-11
ENSMUSG00000020524.16	Gria1	2.10326	2.52806	3.72608e-13	3.37244e-11
ENSMUSG00000021003.10	Galc	2.23718	3.19451	3.74361e-13	3.3823e-11
ENSMUSG00000044502.16	Bod1	2.60594	0.336808	3.7897e-13	3.41186e-11
ENSMUSG00000106519.1	Gm38509	3.13778	0.247477	3.78965e-13	3.41186e-11
ENSMUSG00000080895.1	Gm11645	3.10438	-0.0598164	3.83496e-13	3.44653e-11
ENSMUSG00000025041.16	Nt5c2	2.02485	1.46957	4.29765e-13	3.84207e-11
ENSMUSG00000051793.4	Olfr284	2.74881	0.423153	4.32559e-13	3.86028e-11
ENSMUSG00000106258.1	Rpl7a-ps7	3.22564	1.32437	4.36616e-13	3.88969e-11
ENSMUSG00000049764.8	Zfp280b	2.11291	0.79561	4.46412e-13	3.96313e-11
ENSMUSG00000038352.15	Arl5c	2.81774	0.813453	4.48211e-13	3.9722e-11
ENSMUSG00000023832.14	Acat2	2.48544	0.795087	4.56982e-13	4.02894e-11
ENSMUSG00000051853.10	Arf3	2.09821	2.16544	4.62036e-13	4.06647e-11
ENSMUSG00000113993.1	Gm47659	3.46359	-0.0160968	4.65118e-13	4.08655e-11
ENSMUSG00000106547.1	B230303O12Rik	2.76117	1.02567	4.66335e-13	4.09021e-11
ENSMUSG00000002985.16	Apoe	2.2599	2.27823	4.6963e-13	4.11204e-11
ENSMUSG00000021728.8	Emb	2.34269	2.70154	4.72102e-13	4.12661e-11
ENSMUSG00000107127.1	Gm6719	3.48058	-0.0860844	4.78727e-13	4.17736e-11
ENSMUSG00000031660.13	Brd7	2.23499	2.29742	4.84487e-13	4.22041e-11
ENSMUSG00000038305.15	Spats2l	1.86401	1.58133	5.10771e-13	4.4418e-11
ENSMUSG00000049411.15	Tmem241	2.20066	0.719325	5.46713e-13	4.73821e-11
ENSMUSG00000027865.10	Gdap2	2.70021	1.79805	5.53574e-13	4.78954e-11
ENSMUSG00000082847.1	Gm5759	3.40635	0.777737	5.55611e-13	4.79903e-11
ENSMUSG00000028932.7	Psmc2	2.10005	0.954228	5.62433e-13	4.84975e-11
ENSMUSG00000020798.14	Spns3	2.19868	0.615805	5.75654e-13	4.95538e-11
ENSMUSG00000115688.1	Gm49209	3.68891	1.08773	6.08198e-13	5.22671e-11
ENSMUSG00000041272.11	Tox	1.92598	1.84094	6.35936e-13	5.42853e-11
ENSMUSG00000112676.1	Gm20108	3.46016	0.248864	6.37348e-13	5.43151e-11
ENSMUSG00000074505.5	Fat3	2.02888	2.55044	6.61278e-13	5.62605e-11
ENSMUSG00000028134.11	Ptbp2	2.11691	2.02392	6.76385e-13	5.745e-11
ENSMUSG00000026914.15	Psmd14	2.37978	1.22989	7.04772e-13	5.97616e-11
ENSMUSG00000037262.7	Kin	2.5581	0.451785	7.31361e-13	6.19134e-11
ENSMUSG00000021033.11	Gstz1	2.43677	2.72121	7.446e-13	6.29298e-11
ENSMUSG00000046668.8	Cxxc5	2.34184	1.07188	7.46636e-13	6.29976e-11
ENSMUSG00000108370.1	Gm8209	3.00823	1.36611	8.01246e-13	6.73826e-11
ENSMUSG00000046463.5	5930403N24Rik	2.19097	1.01013	8.03713e-13	6.74788e-11
ENSMUSG00000001270.9	Ckb	2.58086	2.28602	8.17819e-13	6.85504e-11
ENSMUSG00000013662.5	Atad1	2.22995	0.849394	8.28416e-13	6.93248e-11
ENSMUSG00000107131.1	Gm43763	3.38192	0.128362	8.52076e-13	7.10718e-11
ENSMUSG00000022212.15	Cpne6	2.37862	1.08076	8.75585e-13	7.2803e-11
ENSMUSG00000116758.1	Gm19291	3.59005	0.276236	8.75684e-13	7.2803e-11
ENSMUSG00000031734.13	Irx3	2.46233	1.80586	9.53746e-13	7.90355e-11
ENSMUSG00000044167.6	Foxo1	2.04961	2.19886	9.88405e-13	8.15107e-11
ENSMUSG00000029472.13	Anapc5	1.9128	1.3772	1.01611e-12	8.36606e-11
ENSMUSG00000113459.1	Gm30655	2.47765	1.21261	1.03587e-12	8.515e-11
ENSMUSG00000053192.9	Mllt11	3.23994	2.67026	1.04675e-12	8.59058e-11
ENSMUSG00000048304.8	Slitrk3	2.31705	0.749192	1.06447e-12	8.722e-11
ENSMUSG00000074179.11	Gsta5	3.31601	0.408361	1.08154e-12	8.84764e-11
ENSMUSG00000108082.1	Btf3-ps6	3.14831	0.00658761	1.09428e-12	8.93759e-11
ENSMUSG00000109854.1	Gm45345	2.9854	0.624603	1.12679e-12	9.18839e-11
ENSMUSG00000021665.9	Hexb	2.18096	1.18543	1.13225e-12	9.21819e-11
ENSMUSG00000056383.10	AI987944	2.7268	1.3402	1.14583e-12	9.30832e-11
ENSMUSG00000040537.17	Adam22	2.19185	2.15761	1.17913e-12	9.55411e-11
ENSMUSG00000039661.14	Dusp26	2.74379	1.69033	1.21011e-12	9.7812e-11
ENSMUSG00000050148.9	Ubqln2	2.15161	1.84181	1.21934e-12	9.8331e-11
ENSMUSG00000015542.17	Nat9	2.75906	0.22376	1.34108e-12	1.07808e-10
ENSMUSG00000116841.1	Gm49737	3.20913	0.496747	1.50286e-12	1.20434e-10
ENSMUSG00000095953.2	6030469F06Rik	3.08936	0.0536753	1.52125e-12	1.21716e-10
ENSMUSG00000101798.1	Gm28995	2.97033	0.0961831	1.58241e-12	1.26215e-10
ENSMUSG00000018740.14	Slc25a35	2.49591	0.830125	1.59149e-12	1.2674e-10
ENSMUSG00000104398.1	Gm37964	2.46135	0.853039	1.61236e-12	1.28203e-10
ENSMUSG00000049001.5	Ndnf	1.98763	1.49775	1.64347e-12	1.30473e-10
ENSMUSG00000028675.12	Pnrc2	2.54806	2.01225	1.66205e-12	1.31743e-10
ENSMUSG00000105590.1	Gm43364	2.45923	0.916785	1.69833e-12	1.33995e-10
ENSMUSG00000110615.1	Gm45890	2.38602	0.609746	1.7439e-12	1.37378e-10
ENSMUSG00000039108.14	Lsm14b	2.28835	0.701534	1.75993e-12	1.38427e-10
ENSMUSG00000017176.17	Nt5c3b	2.22757	0.759324	1.78187e-12	1.39937e-10
ENSMUSG00000037159.11	Wee2	2.46913	0.676894	1.83109e-12	1.43581e-10
ENSMUSG00000098234.7	Snhg6	2.67282	0.171881	1.83944e-12	1.43795e-10
ENSMUSG00000038366.15	Lasp1	2.08906	1.5633	1.90672e-12	1.48826e-10
ENSMUSG00000044820.6	AY074887	1.9621	1.60393	1.91949e-12	1.49594e-10
ENSMUSG00000109285.1	Olfr1488-ps1	3.59247	-0.119514	1.95686e-12	1.51812e-10
ENSMUSG00000105355.1	Gm40117	3.05291	-0.0164371	1.98057e-12	1.53418e-10
ENSMUSG00000065005.1	NA	3.36407	0.463301	2.01392e-12	1.55765e-10
ENSMUSG00000019295.8	Tmem129	2.49555	0.789055	2.20641e-12	1.69624e-10
ENSMUSG00000021313.16	Ryr2	1.6757	3.45329	2.35588e-12	1.80843e-10
ENSMUSG00000069899.3	Gm12166	2.99463	0.488042	2.44393e-12	1.8732e-10
ENSMUSG00000029126.7	Nsg1	2.10889	0.717684	2.46468e-12	1.88627e-10
ENSMUSG00000061482.7	H4c4	2.65779	0.517966	2.47448e-12	1.89094e-10
ENSMUSG00000090474.3	Gm9372	3.46367	1.92154	2.52653e-12	1.92783e-10
ENSMUSG00000100270.1	Gm21803	3.35886	-0.156085	2.5372e-12	1.93308e-10
ENSMUSG00000025370.7	Cdh9	2.63082	1.60668	2.55618e-12	1.93598e-10
ENSMUSG00000081249.3	Gm11517	2.80967	0.286966	2.55097e-12	1.93598e-10
ENSMUSG00000095741.3	Rhox2f	3.70214	0.363422	2.55491e-12	1.93598e-10
ENSMUSG00000027239.14	Mdk	2.34214	0.73227	2.66655e-12	2.01659e-10
ENSMUSG00000022340.15	Sybu	2.04609	1.9119	2.71833e-12	2.0527e-10
ENSMUSG00000048581.12	E130311K13Rik	2.31551	0.778906	2.73216e-12	2.0601e-10
ENSMUSG00000102854.1	C130023A14Rik	3.03003	2.07849	2.74515e-12	2.06684e-10
ENSMUSG00000020171.8	Yeats4	2.56311	0.51521	2.82527e-12	2.12403e-10
ENSMUSG00000074238.6	Ap1ar	2.04518	1.61094	3.0532e-12	2.28194e-10
ENSMUSG00000029623.14	Pdap1	2.61817	1.51065	3.17593e-12	2.3702e-10
ENSMUSG00000103482.1	Gm37999	2.54505	0.649159	3.19399e-12	2.3802e-10
ENSMUSG00000029380.11	Cxcl1	3.17682	1.2055	3.30697e-12	2.45364e-10
ENSMUSG00000026875.14	Traf1	2.22807	2.26954	3.42578e-12	2.53444e-10
ENSMUSG00000002076.11	Hsf2bp	2.4557	1.46853	3.42554e-12	2.53444e-10
ENSMUSG00000030423.7	Pop4	2.30125	0.599427	3.47734e-12	2.56885e-10
ENSMUSG00000099492.1	Gm5525	3.17819	0.689852	3.50413e-12	2.5849e-10
ENSMUSG00000025630.8	Hprt	2.55003	1.00049	3.53717e-12	2.59941e-10
ENSMUSG00000063856.7	Gpx1	2.67187	1.05109	3.7241e-12	2.72746e-10
ENSMUSG00000105676.1	Gm43403	2.82633	0.782717	3.76962e-12	2.7529e-10
ENSMUSG00000106112.1	Gm43434	2.61308	-0.000969741	3.84575e-12	2.80449e-10
ENSMUSG00000029447.11	Cct6a	2.01982	1.53841	4.12752e-12	2.99712e-10
ENSMUSG00000027419.9	Pcsk2	1.66738	1.86841	4.21767e-12	3.05389e-10
ENSMUSG00000053062.16	Jam2	2.55103	2.08315	4.24884e-12	3.0721e-10
ENSMUSG00000021130.8	Galnt16	1.97325	1.54245	4.31672e-12	3.11677e-10
ENSMUSG00000023868.17	Pde10a	1.90286	2.152	4.32629e-12	3.11927e-10
ENSMUSG00000081703.1	Gm6285	2.83527	-0.0493425	4.5081e-12	3.2412e-10
ENSMUSG00000075465.2	Gm10837	1.84885	1.24746	4.62842e-12	3.31836e-10
ENSMUSG00000022437.7	Samm50	2.05192	1.18881	4.66704e-12	3.33667e-10
ENSMUSG00000048330.14	Ric3	2.2815	2.00921	4.6616e-12	3.33667e-10
ENSMUSG00000077639.1	Gm22772	3.02581	-0.206307	4.89591e-12	3.48565e-10
ENSMUSG00000075574.2	Defb48	3.18522	1.5065	4.89079e-12	3.48565e-10
ENSMUSG00000074656.12	Eif2s2	2.30112	2.41604	4.98225e-12	3.54219e-10
ENSMUSG00000091531.2	Olfr102	2.62124	0.414549	5.00747e-12	3.55516e-10
ENSMUSG00000103858.1	Gm37604	2.92349	0.294989	5.16926e-12	3.65686e-10
ENSMUSG00000085594.1	Gm11551	3.00152	0.280511	5.17221e-12	3.65686e-10
ENSMUSG00000105827.1	H2bc18	2.7368	-0.085237	5.22498e-12	3.68907e-10
ENSMUSG00000102814.1	Gm37812	2.81482	0.74697	5.31786e-12	3.74597e-10
ENSMUSG00000097252.1	NA	2.74603	0.59359	5.34428e-12	3.75673e-10
ENSMUSG00000047454.12	Gphn	2.34604	1.96292	5.38127e-12	3.77332e-10
ENSMUSG00000065254.1	NA	3.1236	-0.0171701	5.3989e-12	3.78049e-10
ENSMUSG00000036030.9	Prtg	1.73218	1.66258	5.42592e-12	3.78902e-10
ENSMUSG00000116630.1	Rpl7a-ps4	3.41264	0.71342	5.7279e-12	3.98355e-10
ENSMUSG00000038866.15	Zcchc2	1.94519	1.63167	5.88011e-12	4.07829e-10
ENSMUSG00000022556.11	Hsf1	1.94163	1.41017	5.93819e-12	4.11298e-10
ENSMUSG00000097580.1	Gm5432	2.90024	0.297182	6.13514e-12	4.24364e-10
ENSMUSG00000097055.2	Gm4419	2.39726	0.888564	6.17475e-12	4.26525e-10
ENSMUSG00000102424.2	Paupar	2.46135	1.56283	6.19325e-12	4.27225e-10
ENSMUSG00000032235.15	Ice2	1.82097	0.953082	6.43486e-12	4.42696e-10
ENSMUSG00000030045.10	Mrpl19	2.62698	2.51548	6.61171e-12	4.53437e-10
ENSMUSG00000101373.2	Zfp813-ps	2.93494	0.0305944	6.7518e-12	4.61391e-10
ENSMUSG00000113894.1	Gm48838	3.0153	1.51428	6.77925e-12	4.62648e-10
ENSMUSG00000004961.7	Syt5	2.73973	1.07315	6.83688e-12	4.65958e-10
ENSMUSG00000087919.1	Gm24908	3.26936	0.682196	7.20041e-12	4.89427e-10
ENSMUSG00000050321.2	Neto1	2.24734	1.4589	7.4271e-12	5.04164e-10
ENSMUSG00000051235.10	Gen1	2.22236	2.58847	7.74825e-12	5.23941e-10
ENSMUSG00000045733.7	Sprn	2.29964	0.823356	7.74925e-12	5.23941e-10
ENSMUSG00000112295.1	Gm47017	2.62662	1.27493	7.9702e-12	5.38168e-10
ENSMUSG00000042423.9	Fbrs	1.94686	0.980937	8.01165e-12	5.40252e-10
ENSMUSG00000031864.16	Ints10	1.86034	1.00349	8.11262e-12	5.45796e-10
ENSMUSG00000023904.10	Hcfc1r1	2.40273	-0.0594344	8.11525e-12	5.45796e-10
ENSMUSG00000051200.3	Olfr513	3.30889	1.17721	8.12673e-12	5.45849e-10
ENSMUSG00000040048.14	Ndufb10	3.06674	1.65693	8.22236e-12	5.50325e-10
ENSMUSG00000026483.13	Niban1	2.25594	1.68754	8.40376e-12	5.61501e-10
ENSMUSG00000052488.7	Cherp	1.82363	0.724762	8.71877e-12	5.81787e-10
ENSMUSG00000022951.16	Rcan1	2.70876	1.88604	8.74678e-12	5.82894e-10
ENSMUSG00000103394.1	Gm10152	2.43549	0.490247	8.92619e-12	5.94075e-10
ENSMUSG00000066613.14	Zfp932	3.14744	1.60195	1.00977e-11	6.68554e-10
ENSMUSG00000044976.17	Wdr72	2.10893	1.52231	1.05673e-11	6.98745e-10
ENSMUSG00000024378.9	Stard4	2.01382	1.01875	1.05839e-11	6.98934e-10
ENSMUSG00000105161.1	Gm42595	2.30147	-0.174211	1.08448e-11	7.14318e-10
ENSMUSG00000031353.13	Rbbp7	2.11225	0.563591	1.1141e-11	7.30373e-10
ENSMUSG00000101243.1	Gm28919	2.98973	-0.0136844	1.14171e-11	7.47191e-10
ENSMUSG00000116092.1	Gm49422	2.88363	0.202822	1.15264e-11	7.53378e-10
ENSMUSG00000062963.10	Ufc1	2.09585	0.339536	1.16098e-11	7.57858e-10
ENSMUSG00000021054.6	Sgpp1	1.96739	2.21551	1.16661e-11	7.59592e-10
ENSMUSG00000116653.1	Gm8900	3.16721	-0.00224807	1.16613e-11	7.59592e-10
ENSMUSG00000041773.8	Enc1	2.3216	5.87855	1.18261e-11	7.68048e-10
ENSMUSG00000031628.9	Casp3	2.20144	0.511913	1.19237e-11	7.73403e-10
ENSMUSG00000025176.14	Hoga1	2.33731	1.2344	1.21645e-11	7.88022e-10
ENSMUSG00000040373.12	Cacng5	1.94403	0.532211	1.26005e-11	8.13172e-10
ENSMUSG00000046159.16	Chrm3	2.07766	1.09907	1.27002e-11	8.18568e-10
ENSMUSG00000006095.12	Tbcb	2.02581	0.974711	1.31972e-11	8.49529e-10
ENSMUSG00000060036.14	Rpl3	2.47682	2.15047	1.35856e-11	8.73433e-10
ENSMUSG00000036353.13	P2ry12	2.3718	0.598286	1.38096e-11	8.85604e-10
ENSMUSG00000075093.3	Olfr1231	2.16659	1.35622	1.38572e-11	8.87537e-10
ENSMUSG00000032244.9	Fem1b	2.13513	1.65678	1.48267e-11	9.46074e-10
ENSMUSG00000111070.1	Gm47596	2.80968	0.727965	1.53615e-11	9.78973e-10
ENSMUSG00000109320.1	Gm44679	2.26751	1.40157	1.55188e-11	9.86533e-10
ENSMUSG00000036427.5	Gpi1	2.04332	1.59194	1.57589e-11	1.00055e-09
ENSMUSG00000055436.18	Srsf11	2.03454	2.39649	1.58973e-11	1.00808e-09
ENSMUSG00000009907.17	Vps4b	2.13059	1.21074	1.6507e-11	1.04545e-09
ENSMUSG00000115957.1	Gm49466	3.02185	-0.211738	1.75554e-11	1.10636e-09
ENSMUSG00000091993.2	B930036N10Rik	1.98098	0.719728	1.76612e-11	1.11165e-09
ENSMUSG00000115257.1	Gm30467	2.50435	0.243006	1.78402e-11	1.12016e-09
ENSMUSG00000083895.1	Gm12074	3.42801	0.373525	1.79164e-11	1.12356e-09
ENSMUSG00000108622.2	Gm36864	2.24441	-0.0820207	1.82404e-11	1.14248e-09
ENSMUSG00000025764.14	Jade1	1.77304	2.18196	1.86045e-11	1.16243e-09
ENSMUSG00000087086.7	Gm13269	1.94531	0.388496	1.85973e-11	1.16243e-09
ENSMUSG00000026511.7	Srp9	2.17374	1.65635	1.86414e-11	1.16331e-09
ENSMUSG00000019210.10	Atp6v1e1	2.1028	1.88743	1.88285e-11	1.17355e-09
ENSMUSG00000033061.15	Resp18	2.71193	0.771336	1.91508e-11	1.19218e-09
ENSMUSG00000090126.1	4930519F09Rik	2.71367	0.210261	1.93528e-11	1.20254e-09
ENSMUSG00000105832.1	Gm43841	2.99318	-0.0353847	1.93643e-11	1.20254e-09
ENSMUSG00000096564.1	NA	3.13432	0.327048	1.95026e-11	1.20966e-09
ENSMUSG00000059279.11	Olfr224	2.93214	0.589537	2.17263e-11	1.34269e-09
ENSMUSG00000080268.3	Brms1	2.54053	0.334951	2.33988e-11	1.44082e-09
ENSMUSG00000033653.18	Vps8	1.77972	1.42558	2.59784e-11	1.59007e-09
ENSMUSG00000112786.1	Gm47696	2.83284	-0.072347	2.61705e-11	1.59991e-09
ENSMUSG00000057265.13	Bbof1	2.14713	1.23916	2.68367e-11	1.63672e-09
ENSMUSG00000061315.14	Naca	2.09153	1.21962	2.80674e-11	1.7077e-09
ENSMUSG00000037603.6	Gm5519	3.1267	0.128909	2.81413e-11	1.71015e-09
ENSMUSG00000005150.16	Wdr83	2.61643	0.84364	2.862e-11	1.73718e-09
ENSMUSG00000049401.10	Ogfr	2.40674	0.760629	2.92881e-11	1.77351e-09
ENSMUSG00000059461.7	Gm7331	2.47577	0.392421	2.97692e-11	1.80051e-09
ENSMUSG00000029092.9	D5Ertd615e	2.23384	1.14373	2.98811e-11	1.80334e-09
ENSMUSG00000082111.1	Gm12479	2.34718	0.830798	2.98866e-11	1.80334e-09
ENSMUSG00000001158.13	Snrnp27	2.5789	0.862383	3.0069e-11	1.8122e-09
ENSMUSG00000075486.10	Commd6	1.85384	0.537063	3.03642e-11	1.82783e-09
ENSMUSG00000045519.15	Zfp560	2.03849	0.319438	3.08182e-11	1.8508e-09
ENSMUSG00000112834.1	Gm48464	3.48569	0.74006	3.14466e-11	1.88631e-09
ENSMUSG00000016349.10	Eef1a2	2.13292	1.09705	3.14959e-11	1.88705e-09
ENSMUSG00000039904.9	Gpr37	1.95883	1.14946	3.22456e-11	1.92745e-09
ENSMUSG00000101449.1	Gm17791	2.59725	0.481147	3.22179e-11	1.92745e-09
ENSMUSG00000030782.16	Tgfb1i1	1.96916	1.11983	3.28736e-11	1.96269e-09
ENSMUSG00000061360.8	Phf5a	2.71306	0.871125	3.51068e-11	2.09357e-09
ENSMUSG00000019814.5	Ltv1	2.31399	0.890932	3.5569e-11	2.11866e-09
ENSMUSG00000112391.1	Gm48230	2.00924	0.905474	3.60904e-11	2.14471e-09
ENSMUSG00000111947.1	Gm47438	2.19792	1.63643	3.71231e-11	2.20352e-09
ENSMUSG00000097060.1	Gm26759	2.41096	1.91897	3.72848e-11	2.21054e-09
ENSMUSG00000067017.5	Capza1-ps1	2.72321	1.21288	3.79766e-11	2.24634e-09
ENSMUSG00000087794.1	NA	3.09972	-0.242776	3.83618e-11	2.26388e-09
ENSMUSG00000100010.5	1700010I02Rik	2.97155	0.873105	3.93715e-11	2.31811e-09
ENSMUSG00000071860.1	NA	2.1698	0.739209	3.99832e-11	2.35141e-09
ENSMUSG00000089798.9	1700028K03Rik	2.4275	1.0563	4.02211e-11	2.36268e-09
ENSMUSG00000106498.1	Gm43032	2.78247	0.960338	4.13373e-11	2.42267e-09
ENSMUSG00000098401.1	Mir6377	3.18354	-0.213581	4.54906e-11	2.64784e-09
ENSMUSG00000024099.15	Ndufv2	2.16546	1.48076	4.6272e-11	2.6872e-09
ENSMUSG00000020122.16	Egfr	1.90729	1.42739	4.66208e-11	2.70131e-09
ENSMUSG00000083621.1	Gm14586	2.90362	0.368332	4.69226e-11	2.71571e-09
ENSMUSG00000106536.1	Gm42508	2.67767	1.8636	4.85396e-11	2.80294e-09
ENSMUSG00000104236.1	4930533L02Rik	2.2821	0.217004	4.98718e-11	2.87662e-09
ENSMUSG00000010066.15	Cacna2d2	1.56921	1.96009	5.07045e-11	2.92135e-09
ENSMUSG00000035329.7	Fbxo33	1.79703	1.39848	5.10206e-11	2.93624e-09
ENSMUSG00000060935.6	Tmem263	1.88797	0.840685	5.11188e-11	2.93858e-09
ENSMUSG00000066456.14	Hmgn3	1.85745	0.602885	5.16516e-11	2.96587e-09
ENSMUSG00000067873.11	Htatsf1	1.9728	0.740737	5.21681e-11	2.98881e-09
ENSMUSG00000001056.3	Nhp2	2.57661	1.03204	5.23314e-11	2.9948e-09
ENSMUSG00000111818.1	Gm17749	2.90681	0.903439	5.41099e-11	3.09311e-09
ENSMUSG00000114096.1	Gm48641	2.71551	0.186133	5.55692e-11	3.17297e-09
ENSMUSG00000034675.17	Dbn1	1.81235	0.868577	5.59632e-11	3.1919e-09
ENSMUSG00000037683.14	Armc3	2.01561	1.16508	6.01867e-11	3.42514e-09
ENSMUSG00000044080.9	S100a1	3.1739	0.231535	6.05462e-11	3.43236e-09
ENSMUSG00000025375.15	Aatk	1.83861	1.25912	6.12793e-11	3.46799e-09
ENSMUSG00000075072.3	Olfr48	2.32715	0.776459	6.16371e-11	3.48437e-09
ENSMUSG00000039474.13	Wfs1	2.04831	4.04119	6.28031e-11	3.53853e-09
ENSMUSG00000063480.8	Snu13	2.11322	0.384178	6.29758e-11	3.54435e-09
ENSMUSG00000085573.1	Gm15418	2.35765	0.0950046	6.31316e-11	3.54921e-09
ENSMUSG00000089646.1	Gm15796	3.10488	-0.0291455	6.46599e-11	3.62714e-09
ENSMUSG00000112819.1	Gm46332	3.26359	0.346605	6.724e-11	3.76773e-09
ENSMUSG00000089773.7	Skint1	2.32376	0.887996	6.81712e-11	3.81154e-09
ENSMUSG00000102079.1	Gm21879	2.96527	-0.298925	7.13537e-11	3.97641e-09
ENSMUSG00000026737.12	Pip4k2a	2.45199	1.66658	7.1495e-11	3.97994e-09
ENSMUSG00000030735.6	Gm9755	2.48884	0.020928	7.28907e-11	4.05321e-09
ENSMUSG00000033991.9	Ttc37	1.8733	2.06082	7.97976e-11	4.40847e-09
ENSMUSG00000030056.8	Isy1	2.09654	0.941902	8.04054e-11	4.43725e-09
ENSMUSG00000044792.7	Isca1	1.92485	1.55551	8.22179e-11	4.52748e-09
ENSMUSG00000040022.14	Rab11fip2	2.13405	2.2319	8.26637e-11	4.54669e-09
ENSMUSG00000073650.8	Catip	2.49998	0.742796	8.37284e-11	4.59579e-09
ENSMUSG00000020390.12	Ube2b	2.27389	1.30864	8.52661e-11	4.66514e-09
ENSMUSG00000058655.9	Eif4b	2.02306	1.66037	8.60826e-11	4.69974e-09
ENSMUSG00000106671.1	Gm42900	2.44239	-0.0155936	8.67398e-11	4.72551e-09
ENSMUSG00000031284.16	Pak3	2.11407	3.40791	8.80498e-11	4.79177e-09
ENSMUSG00000027088.10	Phospho2	1.83212	1.00694	8.95762e-11	4.86446e-09
ENSMUSG00000117102.1		2.24051	0.229214	9.14261e-11	4.95438e-09
ENSMUSG00000020407.13	Upp1	2.20345	0.46368	9.17982e-11	4.96927e-09
ENSMUSG00000097439.6	Gm16754	2.1235	1.02006	9.31062e-11	5.01879e-09
ENSMUSG00000025876.15	Unc5a	1.99239	1.06474	9.46033e-11	5.09411e-09
ENSMUSG00000000787.12	Ddx3x	2.48308	2.2808	9.50987e-11	5.11539e-09
ENSMUSG00000052861.13	Dnah6	1.58306	2.41783	9.52102e-11	5.11599e-09
ENSMUSG00000082773.1	Gm15058	2.83387	0.218447	9.64517e-11	5.17725e-09
ENSMUSG00000115460.1	Gm49127	2.53159	-0.0227845	9.86572e-11	5.29008e-09
ENSMUSG00000082051.1	Gm16072	2.04504	1.10638	1.01955e-10	5.46116e-09
ENSMUSG00000044249.3	Defb29	2.55609	-0.317346	1.0266e-10	5.49319e-09
ENSMUSG00000024357.9	Sil1	2.15944	0.186552	1.02828e-10	5.49472e-09
ENSMUSG00000108629.1	Gm44720	2.54291	-0.191799	1.03326e-10	5.51149e-09
ENSMUSG00000090862.3	Rps13	2.1122	1.50864	1.06738e-10	5.67566e-09
ENSMUSG00000027706.8	Sec62	2.35245	2.42409	1.07386e-10	5.69825e-09
ENSMUSG00000103704.1	Gm37291	2.87133	0.31924	1.07508e-10	5.69883e-09
ENSMUSG00000115400.1	Gm49137	2.57269	0.479826	1.11372e-10	5.89138e-09
ENSMUSG00000098315.1	Mir21b	2.98503	-0.216251	1.11722e-10	5.90378e-09
ENSMUSG00000081947.2	Gm14512	2.55289	-0.309846	1.11923e-10	5.90833e-09
ENSMUSG00000109505.1	Gm44677	2.522	1.63164	1.1224e-10	5.91894e-09
ENSMUSG00000052214.9	Opa3	2.07706	2.16397	1.12467e-10	5.92476e-09
ENSMUSG00000099999.1	Gm21795	2.71572	-0.354523	1.14995e-10	6.05169e-09
ENSMUSG00000040276.15	Pacsin1	1.93134	2.12695	1.15275e-10	6.0602e-09
ENSMUSG00000067818.6	Myl9	2.39503	-0.014584	1.22167e-10	6.39615e-09
ENSMUSG00000054013.6	Tmem179	2.14955	1.04737	1.23288e-10	6.44164e-09
ENSMUSG00000088498.1	NA	2.83321	-0.33684	1.25082e-10	6.5287e-09
ENSMUSG00000084029.1	Gm8855	3.02169	0.391567	1.28756e-10	6.7136e-09
ENSMUSG00000047648.13	Fbxo30	2.08389	1.29419	1.30081e-10	6.77574e-09
ENSMUSG00000036822.6	Topors	1.87621	1.51292	1.31763e-10	6.8564e-09
ENSMUSG00000097654.1	Gm26714	2.15384	0.111942	1.35564e-10	7.04697e-09
ENSMUSG00000063564.13	Col23a1	1.89308	1.85185	1.36298e-10	7.07792e-09
ENSMUSG00000001661.5	Hoxc6	1.92362	0.589206	1.38696e-10	7.18056e-09
ENSMUSG00000026177.11	Slc11a1	1.78627	1.04243	1.39222e-10	7.19639e-09
ENSMUSG00000112766.1	Gm40645	2.34387	-0.303722	1.39284e-10	7.19639e-09
ENSMUSG00000098977.1	Gm27196	2.41359	0.289202	1.40905e-10	7.26781e-09
ENSMUSG00000113603.1	Gm47004	2.44556	0.938844	1.40951e-10	7.26781e-09
ENSMUSG00000031748.16	Gnao1	1.89564	2.83299	1.41796e-10	7.29663e-09
ENSMUSG00000116535.1	Gm5962	2.64518	0.247549	1.42885e-10	7.3379e-09
ENSMUSG00000063130.4	Calml3	2.26896	-0.0640357	1.45657e-10	7.47271e-09
ENSMUSG00000014232.14	Cluap1	2.32168	0.889534	1.48104e-10	7.58301e-09
ENSMUSG00000025190.13	Got1	2.27265	1.42107	1.5447e-10	7.8931e-09
ENSMUSG00000098973.1	Mir6236	1.81834	3.11976	1.60587e-10	8.18112e-09
ENSMUSG00000111646.1	Gm40621	2.40953	0.455255	1.61823e-10	8.23585e-09
ENSMUSG00000106898.1	Gm43125	2.33639	-0.114676	1.62893e-10	8.28095e-09
ENSMUSG00000029616.9	Erp29	1.82023	1.75512	1.69328e-10	8.57509e-09
ENSMUSG00000025019.15	Lcor	1.78893	1.88298	1.72566e-10	8.73041e-09
ENSMUSG00000030161.8	Gabarapl1	3.3467	3.16057	1.75165e-10	8.8531e-09
ENSMUSG00000055707.13	Klhl26	1.81309	1.23317	1.90705e-10	9.60052e-09
ENSMUSG00000070002.7	Ell	1.72148	0.456912	1.93351e-10	9.72414e-09
ENSMUSG00000073117.2	Gm7347	2.33671	-0.201113	1.95671e-10	9.83102e-09
ENSMUSG00000082474.3	Gm8213	2.8486	0.582633	1.96156e-10	9.83612e-09
ENSMUSG00000035152.14	Ap2b1	2.14596	2.03265	1.97252e-10	9.8814e-09
ENSMUSG00000115987.1	Vps28	2.7094	1.27532	2.03127e-10	1.01359e-08
ENSMUSG00000095940.1	Gm16416	2.2338	-0.135342	2.04826e-10	1.02107e-08
ENSMUSG00000081051.4	Gm15427	2.5625	0.783679	2.05596e-10	1.02391e-08
ENSMUSG00000078784.8	Rbis	2.21291	0.227391	2.07497e-10	1.03237e-08
ENSMUSG00000015095.12	Fbxw5	2.30678	1.0168	2.08441e-10	1.03606e-08
ENSMUSG00000071147.2	Tas2r140	2.22909	-0.325603	2.13381e-10	1.05958e-08
ENSMUSG00000085842.7	Pard3bos1	2.57094	0.697793	2.16096e-10	1.07202e-08
ENSMUSG00000109656.1	Gm45548	2.47839	0.986465	2.16398e-10	1.07247e-08
ENSMUSG00000074576.4	Mocs3	1.74472	1.12094	2.23006e-10	1.10308e-08
ENSMUSG00000109719.1	Gm45266	2.10953	0.974501	2.24158e-10	1.10663e-08
ENSMUSG00000029384.5	2010109A12Rik	2.85152	1.54138	2.28998e-10	1.12943e-08
ENSMUSG00000063600.14	Egfem1	2.43847	2.45022	2.29929e-10	1.13184e-08
ENSMUSG00000030432.12	Rpl28	1.91129	0.832816	2.33136e-10	1.14652e-08
ENSMUSG00000109257.1	Gm45200	2.3961	0.188079	2.34473e-10	1.15199e-08
ENSMUSG00000055961.7	BC051076	2.41241	0.439062	2.37837e-10	1.16739e-08
ENSMUSG00000066877.11	Nck2	1.97491	1.13169	2.40117e-10	1.17745e-08
ENSMUSG00000047102.4	Tas2r139	2.91554	-0.0494558	2.44372e-10	1.19717e-08
ENSMUSG00000033854.10	Kcnk10	1.74632	1.66922	2.46402e-10	1.20595e-08
ENSMUSG00000104384.1	Gm37031	2.29628	-0.0607856	2.47317e-10	1.20927e-08
ENSMUSG00000098756.1	Mir378d	2.82171	-0.231507	2.51294e-10	1.22637e-08
ENSMUSG00000038072.14	Galnt11	1.86386	1.31769	2.55024e-10	1.24338e-08
ENSMUSG00000051674.15	Dcun1d4	2.03289	1.13938	2.55325e-10	1.24366e-08
ENSMUSG00000021177.16	Tdp1	1.84973	1.24894	2.56854e-10	1.24992e-08
ENSMUSG00000022378.14	Cyrib	1.78992	1.42555	2.59947e-10	1.26376e-08
ENSMUSG00000108146.1	Gm43889	2.23454	0.681221	2.60692e-10	1.26618e-08
ENSMUSG00000094793.1	Mup12	2.42564	-0.394252	2.65951e-10	1.2905e-08
ENSMUSG00000068014.5	Gm14648	2.4549	-0.0491379	2.77301e-10	1.34047e-08
ENSMUSG00000109003.1	Gm36011	2.43201	0.794994	2.84306e-10	1.36915e-08
ENSMUSG00000038374.10	Rbm8a	1.45151	0.799432	2.87558e-10	1.38351e-08
ENSMUSG00000086584.8	Gm12002	2.37433	1.51926	2.91437e-10	1.39821e-08
ENSMUSG00000103869.1	Gm37420	2.17347	0.30761	2.98124e-10	1.42627e-08
ENSMUSG00000033419.15	Snap91	1.74154	1.57298	2.99848e-10	1.43318e-08
ENSMUSG00000055170.4	Ifng	2.50261	0.00175405	3.101e-10	1.47941e-08
ENSMUSG00000096687.7	Mfsd4b4	1.8086	0.210914	3.15688e-10	1.50326e-08
ENSMUSG00000038489.8	Polr2l	2.09581	0.128355	3.2698e-10	1.55558e-08
ENSMUSG00000051355.18	Commd1	1.9095	0.75699	3.31238e-10	1.57144e-08
ENSMUSG00000110771.1	Gm47785	2.52642	0.731305	3.33446e-10	1.58045e-08
ENSMUSG00000025648.18	Pfkfb4	1.99696	1.13291	3.35519e-10	1.58733e-08
ENSMUSG00000060038.14	Dhps	1.95167	1.13493	3.37058e-10	1.59313e-08
ENSMUSG00000001416.13	Cct3	2.18059	2.08967	3.39198e-10	1.60028e-08
ENSMUSG00000028327.14	Stra6l	1.80241	1.06675	3.44376e-10	1.62171e-08
ENSMUSG00000029832.16	Nfe2l3	2.0038	1.494	3.50522e-10	1.64822e-08
ENSMUSG00000038930.11	Rccd1	1.7475	2.50442	3.62545e-10	1.701e-08
ENSMUSG00000049231.6	Gm12497	2.37315	0.0995491	3.62441e-10	1.701e-08
ENSMUSG00000035048.13	Anapc13	2.00908	0.844182	3.65079e-10	1.71131e-08
ENSMUSG00000044285.8	Ubb-ps	2.56407	0.694876	3.84585e-10	1.79944e-08
ENSMUSG00000117083.1	Gm49800	2.57132	-0.279137	4.06977e-10	1.89726e-08
ENSMUSG00000029213.11	Commd8	2.39691	1.69247	4.25234e-10	1.97875e-08
ENSMUSG00000020460.15	Rps27a	2.16782	4.29034	4.41617e-10	2.05125e-08
ENSMUSG00000008475.13	Arpc5	1.98922	1.40584	4.4429e-10	2.06179e-08
ENSMUSG00000105469.1	A930036I15Rik	2.73827	0.722842	4.44791e-10	2.06224e-08
ENSMUSG00000099437.1	Gm29135	2.22362	0.72043	4.51615e-10	2.09008e-08
ENSMUSG00000103430.1	Gm36996	2.83104	-0.017276	4.53245e-10	2.09572e-08
ENSMUSG00000087564.1	Gm11817	2.61326	0.411734	4.58132e-10	2.11258e-08
ENSMUSG00000029152.13	Ociad1	1.94	1.56764	4.58802e-10	2.11376e-08
ENSMUSG00000101410.1	Gm28581	2.39144	-0.124198	4.59577e-10	2.11542e-08
ENSMUSG00000101362.1	Mrgprb9-ps	2.42867	-0.214066	4.63559e-10	2.13183e-08
ENSMUSG00000102270.1	Gm8388	2.97444	1.49258	4.66715e-10	2.14248e-08
ENSMUSG00000021890.6	Eaf1	1.69684	0.947166	4.69908e-10	2.1552e-08
ENSMUSG00000054693.14	Adam10	1.90316	1.14321	4.71145e-10	2.15894e-08
ENSMUSG00000110239.1	Gm45620	3.01731	1.54208	4.86759e-10	2.22848e-08
ENSMUSG00000087644.1	Gm14703	1.97468	0.896592	4.99485e-10	2.28435e-08
ENSMUSG00000035069.3	Oma1	1.9421	0.124768	5.06523e-10	2.31274e-08
ENSMUSG00000081346.1	Gm12030	2.799	0.4687	5.07306e-10	2.31425e-08
ENSMUSG00000036362.2	P2ry13	2.01778	0.23883	5.12182e-10	2.33441e-08
ENSMUSG00000035984.14	Nme5	2.22623	-0.0130481	5.12913e-10	2.33565e-08
ENSMUSG00000114692.1	Gm48157	2.83248	0.0476908	5.14329e-10	2.34001e-08
ENSMUSG00000107747.1	Gm5881	2.66878	-0.0908788	5.19267e-10	2.36038e-08
ENSMUSG00000077872.1	Mir878	3.03583	-0.2089	5.20892e-10	2.36566e-08
ENSMUSG00000102342.1	Gm37380	2.14983	-0.416702	5.43627e-10	2.46452e-08
ENSMUSG00000098138.1	Gm9081	2.23773	-0.235136	5.60377e-10	2.5382e-08
ENSMUSG00000023938.8	Aars2	1.79335	0.662806	5.86697e-10	2.65271e-08
ENSMUSG00000035614.11	Togaram1	1.65501	1.78968	6.36243e-10	2.86657e-08
ENSMUSG00000109543.1	Gm44844	2.948	0.76737	6.37117e-10	2.86798e-08
ENSMUSG00000001415.10	Smg5	1.88238	1.37164	6.46327e-10	2.90688e-08
ENSMUSG00000034245.10	Hdac11	1.93355	0.951186	6.52912e-10	2.93342e-08
ENSMUSG00000108708.1	Gm29977	2.31388	-0.180399	6.53377e-10	2.93342e-08
ENSMUSG00000105508.1	Gm32921	2.70037	-0.0871675	6.5769e-10	2.95019e-08
ENSMUSG00000030990.18	Pgap2	1.9083	1.22907	6.60131e-10	2.95594e-08
ENSMUSG00000061032.9	Rrp1	1.97363	1.32164	6.6595e-10	2.97938e-08
ENSMUSG00000079555.2	Haus3	2.00942	0.991446	7.01829e-10	3.13167e-08
ENSMUSG00000116685.1	Gm49664	2.87388	-0.164954	7.09665e-10	3.16387e-08
ENSMUSG00000044667.12	Plppr4	1.86911	2.52522	7.11463e-10	3.16911e-08
ENSMUSG00000057223.6	Gm6578	2.25206	-0.0981764	7.17018e-10	3.19107e-08
ENSMUSG00000085733.1	Arhgap27os1	2.48909	-0.120973	7.6041e-10	3.3783e-08
ENSMUSG00000003410.8	Elavl3	2.02055	3.02331	7.71647e-10	3.42226e-08
ENSMUSG00000044433.16	Camsap3	1.6785	0.820965	7.83355e-10	3.46816e-08
ENSMUSG00000102979.1	Gm37350	2.5735	-0.0126035	7.99365e-10	3.53292e-08
ENSMUSG00000028403.15	Zdhhc21	1.61808	1.50929	8.09416e-10	3.56807e-08
ENSMUSG00000042360.12	4930433N12Rik	2.1479	-0.136316	8.08515e-10	3.56807e-08
ENSMUSG00000070891.2	Gm12689	2.22969	0.783632	8.20444e-10	3.61043e-08
ENSMUSG00000086758.1	Gm13912	2.13068	-0.0581797	8.26294e-10	3.62994e-08
ENSMUSG00000112034.1	Gm48363	2.14633	1.22199	8.33118e-10	3.65677e-08
ENSMUSG00000097356.1	Gm26774	1.75577	0.251038	8.50843e-10	3.72815e-08
ENSMUSG00000108954.1	Gm44901	1.88521	0.839316	8.61706e-10	3.77251e-08
ENSMUSG00000111553.1	Gm18892	2.37894	-0.351995	8.69055e-10	3.80143e-08
ENSMUSG00000109771.1	Gm35315	2.14558	0.126128	8.96268e-10	3.91041e-08
ENSMUSG00000083817.1	Gm14400	2.47325	-0.326522	9.14301e-10	3.98228e-08
ENSMUSG00000114634.1	F830210D05Rik	2.20363	-0.139326	9.18043e-10	3.99177e-08
ENSMUSG00000043067.15	Dpy19l1	1.63919	1.56557	9.19943e-10	3.99662e-08
ENSMUSG00000047193.16	Dync2h1	1.56838	2.97717	9.44321e-10	4.09233e-08
ENSMUSG00000115355.1	4930445E18Rik	2.29764	0.504118	1.01633e-09	4.39666e-08
ENSMUSG00000019849.11	Prep	1.74931	2.08223	1.02438e-09	4.42398e-08
ENSMUSG00000110888.1	Gm47237	1.85861	0.366112	1.05476e-09	4.55135e-08
ENSMUSG00000022462.7	Slc38a2	1.88245	2.7757	1.0569e-09	4.55327e-08
ENSMUSG00000032399.8	Rpl4	2.88573	2.52773	1.05699e-09	4.55327e-08
ENSMUSG00000111072.1	Gm9068	2.60523	0.443559	1.10059e-09	4.73311e-08
ENSMUSG00000083749.1	Gm13100	2.46741	0.439542	1.10576e-09	4.75134e-08
ENSMUSG00000019804.12	Snx3	2.58326	1.72115	1.12884e-09	4.84232e-08
ENSMUSG00000033192.5	Lpcat2	2.07776	0.811069	1.13259e-09	4.85436e-08
ENSMUSG00000006241.16	Ccdc159	2.16034	0.913829	1.15021e-09	4.92573e-08
ENSMUSG00000113446.1	Gm47455	2.65174	-0.228679	1.15615e-09	4.94289e-08
ENSMUSG00000079444.9	Gm21981	2.3482	-0.28854	1.19542e-09	5.1065e-08
ENSMUSG00000077350.1	NA	2.52064	-0.289835	1.19897e-09	5.11736e-08
ENSMUSG00000025867.8	Cplx2	1.75505	0.999087	1.2083e-09	5.15288e-08
ENSMUSG00000109217.1	Gm44676	2.05524	1.53501	1.21618e-09	5.18216e-08
ENSMUSG00000090523.2	Gypc	1.93785	-0.0514295	1.22095e-09	5.1929e-08
ENSMUSG00000030660.9	Pik3c2a	1.74816	2.5013	1.22627e-09	5.20778e-08
ENSMUSG00000028093.15	Acp6	1.6176	1.92942	1.24569e-09	5.28586e-08
ENSMUSG00000072770.9	Acrbp	2.2829	1.22852	1.26836e-09	5.3731e-08
ENSMUSG00000107002.1	0610012G03Rik	1.9229	0.435618	1.29759e-09	5.4912e-08
ENSMUSG00000022237.17	Ankrd33b	1.78958	1.31896	1.32246e-09	5.58375e-08
ENSMUSG00000020537.9	Drg2	1.73259	0.575107	1.33458e-09	5.63026e-08
ENSMUSG00000032503.18	Arpp21	1.95646	3.76412	1.4059e-09	5.92136e-08
ENSMUSG00000073838.10	Tufm	2.22145	1.01184	1.42338e-09	5.98512e-08
ENSMUSG00000083830.1	Gm8839	2.62976	0.672325	1.45173e-09	6.09928e-08
ENSMUSG00000095392.1	Gm7350	2.26698	-0.290408	1.46463e-09	6.14336e-08
ENSMUSG00000092529.1	Vmn2r-ps80	2.96343	0.160468	1.46747e-09	6.15023e-08
ENSMUSG00000024608.10	Rps14	2.24979	1.18881	1.47194e-09	6.16391e-08
ENSMUSG00000114517.1	Gm19290	2.38429	0.201766	1.48456e-09	6.21169e-08
ENSMUSG00000112944.1	Gm48885	2.14232	0.551582	1.48916e-09	6.22433e-08
ENSMUSG00000082867.1	Gm15730	2.73362	0.0909985	1.49065e-09	6.22433e-08
ENSMUSG00000025925.14	Terf1	1.8545	1.59865	1.49415e-09	6.23136e-08
ENSMUSG00000108911.1	Gm45113	2.94956	0.218583	1.50592e-09	6.27532e-08
ENSMUSG00000078605.2	E030025P04Rik	2.27366	0.0657031	1.51446e-09	6.30578e-08
ENSMUSG00000061062.5	Hdac1-ps	2.24935	-0.121554	1.51898e-09	6.31429e-08
ENSMUSG00000101209.1	Gm8524	2.63034	-0.218444	1.5187e-09	6.31429e-08
ENSMUSG00000082345.1	Gm13622	2.71788	1.13276	1.55433e-09	6.45596e-08
ENSMUSG00000059366.3	Olfr959	2.12339	1.51048	1.58513e-09	6.57853e-08
ENSMUSG00000088340.1	NA	3.24864	1.12503	1.59055e-09	6.5957e-08
ENSMUSG00000043897.13	Vmn2r2	2.32604	1.52848	1.65505e-09	6.84647e-08
ENSMUSG00000114998.1	Gm2157	2.82146	0.452046	1.657e-09	6.84896e-08
ENSMUSG00000063229.15	Ldha	1.95236	1.24864	1.68961e-09	6.97812e-08
ENSMUSG00000062169.13	Cnih4	1.96784	0.741094	1.71083e-09	7.06006e-08
ENSMUSG00000099616.1	4932413F04Rik	1.87015	0.0894688	1.74329e-09	7.16502e-08
ENSMUSG00000108572.1	Gm44883	1.88151	0.789277	1.74289e-09	7.16502e-08
ENSMUSG00000116801.1	Gm38551	2.18005	0.0852279	1.73949e-09	7.16502e-08
ENSMUSG00000068220.6	Lgals1	2.27698	0.0142974	1.7458e-09	7.16959e-08
ENSMUSG00000017390.15	Aldoc	2.21188	2.97739	1.7803e-09	7.29953e-08
ENSMUSG00000115451.1	Gm49025	2.58278	-0.28472	1.78344e-09	7.30653e-08
ENSMUSG00000037720.16	Tmem33	1.97338	1.77713	1.79144e-09	7.33342e-08
ENSMUSG00000055305.15	Zfp93	1.88489	0.226362	1.81955e-09	7.43657e-08
ENSMUSG00000020224.15	Llph	2.10781	0.681007	1.83132e-09	7.4727e-08
ENSMUSG00000025199.16	Chuk	1.66525	0.926566	1.8363e-09	7.48702e-08
ENSMUSG00000103696.1	Gm37531	1.79416	0.944508	1.83979e-09	7.49529e-08
ENSMUSG00000101589.1	Rbm6-ps1	1.69943	-0.0240782	1.84563e-09	7.51305e-08
ENSMUSG00000102425.1	Gm26616	1.76478	0.572399	1.8917e-09	7.68275e-08
ENSMUSG00000042524.14	Sun2	1.81996	1.5327	1.90303e-09	7.72211e-08
ENSMUSG00000081891.1	Gm14660	2.47686	-0.219818	1.92066e-09	7.78746e-08
ENSMUSG00000020090.7	Npffr1	1.71534	2.05206	1.93832e-09	7.85279e-08
ENSMUSG00000031930.11	Wwp2	1.6465	1.8648	1.94023e-09	7.85433e-08
ENSMUSG00000015478.13	Rnf5	2.43889	0.824889	1.98236e-09	8.01851e-08
ENSMUSG00000030268.17	Bcat1	1.42506	1.02011	1.98683e-09	8.02475e-08
ENSMUSG00000033379.13	Atp6v0b	1.99494	0.723761	1.99293e-09	8.04215e-08
ENSMUSG00000081745.1	Gm15549	2.29768	-0.263832	2.01334e-09	8.11808e-08
ENSMUSG00000000223.13	Drp2	1.77399	1.43906	2.0414e-09	8.21824e-08
ENSMUSG00000074060.10	Fbxw15	2.39982	0.480658	2.08754e-09	8.39737e-08
ENSMUSG00000030965.19	Abraxas2	1.64172	1.70859	2.12491e-09	8.53425e-08
ENSMUSG00000074922.1	Fam122a	1.66041	0.0714527	2.17103e-09	8.71218e-08
ENSMUSG00000095590.1	NA	2.73465	-0.25354	2.17263e-09	8.71218e-08
ENSMUSG00000026615.14	Eprs	1.3151	2.0282	2.18959e-09	8.75271e-08
ENSMUSG00000110287.1	Gm45313	2.23185	-0.407955	2.18861e-09	8.75271e-08
ENSMUSG00000025607.15	Copg2	1.77082	1.1991	2.27035e-09	9.06844e-08
ENSMUSG00000039952.15	Dag1	1.65909	1.14408	2.3135e-09	9.23357e-08
ENSMUSG00000027484.2	Bpifa5	1.9149	-0.111393	2.32247e-09	9.2621e-08
ENSMUSG00000097020.1	NA	1.98964	0.380402	2.33113e-09	9.28938e-08
ENSMUSG00000058153.15	Sez6l	1.60736	0.959972	2.34111e-09	9.3219e-08
ENSMUSG00000028634.17	Hivep3	1.55335	2.5581	2.34883e-09	9.34535e-08
ENSMUSG00000022044.14	Stmn4	2.30191	1.16479	2.35341e-09	9.35202e-08
ENSMUSG00000103297.1	Ighv3-2	2.50114	0.0525156	2.37317e-09	9.42017e-08
ENSMUSG00000106836.1	Gm43578	2.14245	0.113938	2.43311e-09	9.65056e-08
ENSMUSG00000030465.19	Psd3	1.7626	3.16101	2.48654e-09	9.81786e-08
ENSMUSG00000040928.15	S100pbp	2.06134	2.92003	2.48682e-09	9.81786e-08
ENSMUSG00000085641.1	4930465M20Rik	2.10518	0.313988	2.50223e-09	9.87105e-08
ENSMUSG00000005374.13	Tbl2	1.51697	1.18237	2.51393e-09	9.90954e-08
ENSMUSG00000106353.1	Gm43726	2.41791	0.63323	2.5395e-09	1.00026e-07
ENSMUSG00000024743.15	Syt7	1.58408	1.89488	2.56736e-09	1.01045e-07
ENSMUSG00000112191.1	Gm31931	2.83352	0.136657	2.57413e-09	1.01234e-07
ENSMUSG00000072683.3	Gm7457	1.77541	0.516829	2.58745e-09	1.01679e-07
ENSMUSG00000093428.1	NA	2.85779	-0.0779653	2.64293e-09	1.0378e-07
ENSMUSG00000052133.16	Sema5b	1.69182	1.28393	2.65353e-09	1.04116e-07
ENSMUSG00000067321.5	Gm7931	2.07187	-0.416631	2.71748e-09	1.06398e-07
ENSMUSG00000106321.1	Gm43674	2.41023	0.138128	2.71795e-09	1.06398e-07
ENSMUSG00000033916.5	Chmp2a	2.015	0.47492	2.74896e-09	1.07447e-07
ENSMUSG00000020412.16	Ascc2	1.73966	0.591614	2.76339e-09	1.07928e-07
ENSMUSG00000034593.16	Myo5a	1.68737	2.9773	2.84651e-09	1.10921e-07
ENSMUSG00000045573.9	Penk	2.21497	0.768673	2.85472e-09	1.11155e-07
ENSMUSG00000028460.6	Sit1	2.042	0.859996	2.85843e-09	1.11215e-07
ENSMUSG00000068407.3	Rnase12	2.55863	-0.198258	2.89884e-09	1.12701e-07
ENSMUSG00000037613.16	Tnfrsf23	2.30651	0.632768	2.96727e-09	1.15274e-07
ENSMUSG00000054720.12	Lrrc8c	1.49687	1.23026	3.01775e-09	1.17146e-07
ENSMUSG00000027322.11	Siglec1	1.71873	0.726216	3.06886e-09	1.1904e-07
ENSMUSG00000112204.1	Gm47553	2.45235	1.37396	3.11924e-09	1.20902e-07
ENSMUSG00000030102.11	Itpr1	1.59656	3.59251	3.14199e-09	1.21692e-07
ENSMUSG00000025277.14	Abhd6	2.06631	0.818965	3.16085e-09	1.22329e-07
ENSMUSG00000032253.13	Phip	1.47223	3.19474	3.21719e-09	1.24227e-07
ENSMUSG00000026864.13	Hspa5	2.16875	3.01505	3.22826e-09	1.24466e-07
ENSMUSG00000114643.1	Gm18064	1.99225	-0.263256	3.27157e-09	1.26041e-07
ENSMUSG00000085423.1		2.53867	-0.0937165	3.3201e-09	1.27814e-07
ENSMUSG00000102399.1	Gm5049	1.80098	0.908661	3.34915e-09	1.28738e-07
ENSMUSG00000108032.1	Olfr210-ps1	2.08199	-0.120596	3.38322e-09	1.2995e-07
ENSMUSG00000050538.8	B230217C12Rik	1.88159	1.45565	3.39421e-09	1.30176e-07
ENSMUSG00000015880.13	Ncapg	1.59128	0.901059	3.44205e-09	1.31776e-07
ENSMUSG00000039470.15	Zdhhc2	2.21913	2.38001	3.46757e-09	1.32591e-07
ENSMUSG00000063823.2	Olfr532	2.06136	0.283062	3.53832e-09	1.35094e-07
ENSMUSG00000067367.9	Lyar	2.20739	1.06946	3.55124e-09	1.35486e-07
ENSMUSG00000106505.1	Gm32693	1.9717	-0.123844	3.57139e-09	1.36128e-07
ENSMUSG00000083874.1	Gm7494	2.29857	0.156982	3.57341e-09	1.36128e-07
ENSMUSG00000086433.1	Rsf1os1	2.52333	0.381559	3.64395e-09	1.38712e-07
ENSMUSG00000114411.1	Gm48176	2.06936	-0.315607	3.7466e-09	1.42301e-07
ENSMUSG00000116769.1	8030451O07Rik	1.92853	-0.0196648	3.81716e-09	1.44873e-07
ENSMUSG00000039801.7	Cplane1	1.39751	1.85158	3.82207e-09	1.44952e-07
ENSMUSG00000030306.14	Tmtc1	1.49004	1.27562	3.89473e-09	1.47218e-07
ENSMUSG00000020231.15	Dip2a	1.5489	1.03648	3.89626e-09	1.47218e-07
ENSMUSG00000080115.3	Eef1akmt3	1.72866	0.794628	3.89095e-09	1.47218e-07
ENSMUSG00000107908.1	Gm43895	2.03865	-0.314281	3.95199e-09	1.49104e-07
ENSMUSG00000021775.11	Nr1d2	2.24999	1.65224	3.98421e-09	1.50208e-07
ENSMUSG00000029131.14	Dnajb6	1.75112	1.05441	4.02421e-09	1.51604e-07
ENSMUSG00000020515.13	Cnot8	1.95117	0.302608	4.0738e-09	1.53359e-07
ENSMUSG00000036356.15	Csgalnact1	1.8752	1.12878	4.08494e-09	1.53666e-07
ENSMUSG00000106214.1	Gm43426	2.20789	1.4258	4.15456e-09	1.55939e-07
ENSMUSG00000083832.1	Gm13771	3.0148	1.03707	4.18925e-09	1.57126e-07
ENSMUSG00000099511.1	Topbp1-ps1	2.73015	-0.194476	4.26799e-09	1.59689e-07
ENSMUSG00000047980.6	Pate5	2.00244	-0.378751	4.49164e-09	1.67728e-07
ENSMUSG00000101196.2	Gm6866	2.55675	-0.120974	4.54762e-09	1.69571e-07
ENSMUSG00000025202.7	Scd3	1.75077	0.568726	4.65174e-09	1.72696e-07
ENSMUSG00000002768.8	Mea1	1.94071	0.335925	4.73824e-09	1.7558e-07
ENSMUSG00000084108.2	Gm15794	2.29596	0.542885	4.73974e-09	1.7558e-07
ENSMUSG00000056222.15	Spock1	1.62821	1.89974	4.79238e-09	1.77273e-07
ENSMUSG00000018999.14	Slc35b4	1.63871	1.11526	4.80105e-09	1.77465e-07
ENSMUSG00000027808.8	Serp1	1.86596	2.02395	4.86634e-09	1.79618e-07
ENSMUSG00000098113.1	Gm2445	2.16206	-0.14826	4.88829e-09	1.80168e-07
ENSMUSG00000106627.1	Gm21680	2.11565	-0.351542	5.02291e-09	1.84863e-07
ENSMUSG00000114766.1	Gm5203	2.43767	0.0740146	5.05332e-09	1.85848e-07
ENSMUSG00000028639.14	Ybx1	1.82643	1.24787	5.2641e-09	1.93043e-07
ENSMUSG00000114737.1	Gm8483	1.92839	-0.194279	5.29897e-09	1.94043e-07
ENSMUSG00000115676.1	4930449C09Rik	1.78749	1.52385	5.3635e-09	1.96026e-07
ENSMUSG00000110205.1	Gm33594	2.14589	-0.150337	5.38234e-09	1.96533e-07
ENSMUSG00000030814.17	Bcl7c	1.5885	1.62706	5.49255e-09	2.00413e-07
ENSMUSG00000011877.13	Git1	1.79198	1.52981	5.55518e-09	2.02409e-07
ENSMUSG00000066057.7	Gm1976	2.07746	1.28693	5.5538e-09	2.02409e-07
ENSMUSG00000113215.1	Gm18749	2.24462	-0.31761	5.60457e-09	2.03918e-07
ENSMUSG00000114821.1	Gm3509	2.20678	0.520833	5.64481e-09	2.05235e-07
ENSMUSG00000114528.1	Gm46388	2.36386	0.130314	5.834e-09	2.11662e-07
ENSMUSG00000106426.1	Gm36211	2.10676	0.0481351	5.93788e-09	2.14972e-07
ENSMUSG00000004815.12	Dgkq	1.62881	0.728086	6.01898e-09	2.176e-07
ENSMUSG00000115158.1	Gm48912	1.90262	-0.00911216	6.3009e-09	2.27148e-07
ENSMUSG00000040112.9	Mrps35	1.55094	1.13807	6.32342e-09	2.27622e-07
ENSMUSG00000059654.7	Reg1	2.5729	0.388323	6.31969e-09	2.27622e-07
ENSMUSG00000069114.8	Zbtb10	1.6181	1.44076	6.33938e-09	2.27731e-07
ENSMUSG00000108173.1	Gm44231	2.07302	0.148875	6.43098e-09	2.30783e-07
ENSMUSG00000087534.1	Gm11418	2.45641	-0.152354	6.43338e-09	2.30783e-07
ENSMUSG00000057411.8	Antkmt	2.37388	0.479487	6.44013e-09	2.30863e-07
ENSMUSG00000020669.15	Sh3yl1	1.74329	0.179373	6.74908e-09	2.41769e-07
ENSMUSG00000019880.10	Rspo3	1.92741	1.09209	6.91043e-09	2.47202e-07
ENSMUSG00000032437.10	Stt3b	1.79008	1.76519	6.98937e-09	2.4985e-07
ENSMUSG00000000817.10	Fasl	2.00849	0.234447	7.24566e-09	2.5865e-07
ENSMUSG00000038721.8	Hoxb7	1.76917	0.273543	7.32719e-09	2.61316e-07
ENSMUSG00000031517.8	Gpm6a	2.16049	4.57989	7.33058e-09	2.61316e-07
ENSMUSG00000050043.16	Tmx2	3.1002	1.60378	7.51137e-09	2.67201e-07
ENSMUSG00000022536.14	Glyr1	1.51908	2.48988	7.57227e-09	2.69179e-07
ENSMUSG00000029467.15	Atp2a2	1.89706	3.46382	7.6116e-09	2.70201e-07
ENSMUSG00000101958.1	Gm19085	1.71825	0.944901	7.63108e-09	2.70704e-07
ENSMUSG00000081331.1	Gm15151	2.54869	-0.222435	7.63893e-09	2.70795e-07
ENSMUSG00000111434.1	Gm47121	2.61387	0.558628	7.77507e-09	2.7543e-07
ENSMUSG00000102704.1	Gm38309	2.01198	0.349368	7.78586e-09	2.7562e-07
ENSMUSG00000063632.6	Sox11	1.71725	3.27489	8.01617e-09	2.83577e-07
ENSMUSG00000076572.6	Igkv18-36	2.43369	-0.205182	8.04151e-09	2.84276e-07
ENSMUSG00000087345.1	Gm13746	2.41465	-0.299378	8.32202e-09	2.9338e-07
ENSMUSG00000057895.11	Zfp105	1.85544	0.500975	8.49601e-09	2.99101e-07
ENSMUSG00000030279.15	C2cd5	1.5651	2.20563	8.53405e-09	3.00233e-07
ENSMUSG00000020562.7	Efcab10	1.9425	0.0106215	8.56616e-09	3.01155e-07
ENSMUSG00000017978.18	Cadps2	1.59731	1.89449	8.75411e-09	3.07551e-07
ENSMUSG00000029334.14	Prkg2	1.68444	1.48416	8.76761e-09	3.0772e-07
ENSMUSG00000092093.1	Gm17528	2.08833	-0.350935	8.93006e-09	3.12871e-07
ENSMUSG00000049556.5	Lingo1	1.78905	1.74235	9.10295e-09	3.18469e-07
ENSMUSG00000055771.2	Gm7936	2.24244	0.204344	9.10856e-09	3.18469e-07
ENSMUSG00000024914.16	Drap1	1.67945	0.801284	9.15552e-09	3.19454e-07
ENSMUSG00000103539.1	Gm37834	1.69507	0.11706	9.17012e-09	3.19745e-07
ENSMUSG00000077971.1	NA	2.44773	-0.283367	9.20419e-09	3.20714e-07
ENSMUSG00000109249.1	Gm44610	1.82856	0.570578	9.36504e-09	3.25652e-07
ENSMUSG00000089785.2	Slc25a5-ps	2.03526	0.782728	9.39062e-09	3.26319e-07
ENSMUSG00000020900.15	Myh10	1.444	1.64228	9.5045e-09	3.29647e-07
ENSMUSG00000097552.2	Rps19-ps12	2.40123	-0.0227804	9.50575e-09	3.29647e-07
ENSMUSG00000027525.17	Phactr3	1.74178	1.59646	1.0029e-08	3.46849e-07
ENSMUSG00000089610.1	NA	2.0079	-0.414604	1.00277e-08	3.46849e-07
ENSMUSG00000025979.13	Mob4	1.84486	1.2849	1.01745e-08	3.51407e-07
ENSMUSG00000032507.15	Fbxl2	1.74915	1.2211	1.02273e-08	3.5299e-07
ENSMUSG00000107648.4	Olfr764-ps1	2.29525	0.0568565	1.03132e-08	3.55716e-07
ENSMUSG00000098162.1	Gm26976	2.58388	-0.0196056	1.05744e-08	3.64231e-07
ENSMUSG00000018481.9	Appbp2	1.65168	3.26109	1.0693e-08	3.68068e-07
ENSMUSG00000000563.17	Atp5pb	2.27148	2.13948	1.08179e-08	3.72117e-07
ENSMUSG00000038276.12	Asic3	1.78025	0.334264	1.08342e-08	3.72312e-07
ENSMUSG00000063615.6	Olfr64	2.00323	0.831158	1.08382e-08	3.72312e-07
ENSMUSG00000082120.1	Gm15720	2.483	-0.109545	1.0933e-08	3.75065e-07
ENSMUSG00000026426.10	Arl8a	1.82384	0.765489	1.10436e-08	3.78606e-07
ENSMUSG00000020457.13	Drg1	1.78391	0.859263	1.11863e-08	3.8324e-07
ENSMUSG00000032047.5	Acat1	1.78315	1.16407	1.12183e-08	3.84078e-07
ENSMUSG00000112225.1	Gm48854	1.55867	-0.25973	1.16007e-08	3.96903e-07
ENSMUSG00000108490.1	1700110I07Rik	2.01948	-0.390122	1.16857e-08	3.99389e-07
ENSMUSG00000115005.1	Gm49195	2.71023	0.443107	1.1689e-08	3.99389e-07
ENSMUSG00000083908.1	Gm6447	2.42885	-0.159632	1.17208e-08	4.00208e-07
ENSMUSG00000029190.19	D5Ertd579e	1.45116	2.09214	1.18427e-08	4.04102e-07
ENSMUSG00000024235.11	Map3k8	1.70215	0.232218	1.18508e-08	4.04108e-07
ENSMUSG00000022386.12	Trmu	1.58263	0.177338	1.18729e-08	4.04321e-07
ENSMUSG00000033439.12	Trmt13	1.84189	2.69923	1.18721e-08	4.04321e-07
ENSMUSG00000038160.7	Atg5	1.5539	0.275331	1.1922e-08	4.05722e-07
ENSMUSG00000010609.15	Psen2	1.93699	1.39764	1.19766e-08	4.07309e-07
ENSMUSG00000104432.1	A430027C01Rik	1.72769	0.923302	1.2106e-08	4.11436e-07
ENSMUSG00000059504.7	Olfr314	1.84022	0.604512	1.21647e-08	4.13154e-07
ENSMUSG00000030337.16	Vamp1	1.81733	3.8813	1.2199e-08	4.14045e-07
ENSMUSG00000115863.1	Gm49485	1.98237	-0.311419	1.22815e-08	4.16291e-07
ENSMUSG00000073563.2	Csnk1g3	2.02389	2.17129	1.23275e-08	4.17296e-07
ENSMUSG00000017778.14	Cox7c	2.13967	1.85451	1.25507e-08	4.24006e-07
ENSMUSG00000115920.1	Gm18283	1.66538	1.21822	1.25858e-08	4.24913e-07
ENSMUSG00000076490.6	Trbc1	2.62261	0.871539	1.26139e-08	4.25579e-07
ENSMUSG00000104903.1	Gm43707	1.72409	0.355048	1.26608e-08	4.2688e-07
ENSMUSG00000074681.2	Defb23	2.08132	-0.206352	1.26952e-08	4.27756e-07
ENSMUSG00000100572.1	2410021H03Rik	2.00596	-0.107443	1.2733e-08	4.28466e-07
ENSMUSG00000025969.15	Nrp2	1.44842	1.73304	1.2998e-08	4.36518e-07
ENSMUSG00000032718.4	Mansc1	1.36579	0.063165	1.31022e-08	4.39442e-07
ENSMUSG00000022827.14	Rabl3	1.69303	1.42933	1.32948e-08	4.45606e-07
ENSMUSG00000094074.1	Olfr1292-ps1	3.03023	0.236501	1.34818e-08	4.5158e-07
ENSMUSG00000059970.7	Hspa2	1.74652	1.54609	1.3563e-08	4.53999e-07
ENSMUSG00000032023.7	Jhy	1.59105	0.679179	1.36181e-08	4.55247e-07
ENSMUSG00000103818.1	Gm38009	1.8696	0.872977	1.36602e-08	4.56357e-07
ENSMUSG00000030643.14	Rab30	1.45738	2.24016	1.396e-08	4.65458e-07
ENSMUSG00000021040.15	Slirp	2.04325	1.10062	1.39521e-08	4.65458e-07
ENSMUSG00000112122.1	Gm47628	1.54973	0.570426	1.42134e-08	4.7245e-07
ENSMUSG00000109315.1	Gm45037	2.02209	-0.322572	1.42252e-08	4.7245e-07
ENSMUSG00000103116.1	4930539M17Rik	2.3202	-0.274289	1.42387e-08	4.72591e-07
ENSMUSG00000036391.16	Sec24a	1.63196	2.18022	1.42683e-08	4.73265e-07
ENSMUSG00000094399.7	Gm21477	1.94945	-0.43578	1.44018e-08	4.76764e-07
ENSMUSG00000109445.1	4930560O18Rik	1.77384	0.244359	1.44557e-08	4.78238e-07
ENSMUSG00000109942.1	Gm45262	1.94394	0.230883	1.44696e-08	4.78389e-07
ENSMUSG00000089875.2	Etohd2	1.47219	0.492871	1.45665e-08	4.81278e-07
ENSMUSG00000104166.1	Gm38247	2.0056	0.172549	1.4649e-08	4.83692e-07
ENSMUSG00000015944.9	Castor2	1.63109	1.95028	1.46795e-08	4.84387e-07
ENSMUSG00000046093.9	Hpcal4	1.67873	4.3015	1.57433e-08	5.17149e-07
ENSMUSG00000021670.14	Hmgcr	1.78317	2.06281	1.57628e-08	5.17456e-07
ENSMUSG00000022031.6	Elp3	2.18629	1.52708	1.58131e-08	5.18774e-07
ENSMUSG00000110924.1	Gm40518	2.56319	1.79194	1.60185e-08	5.25174e-07
ENSMUSG00000042385.14	Gzmk	2.01234	0.0156372	1.60902e-08	5.26848e-07
ENSMUSG00000093416.1	Gm18294	2.36144	0.767843	1.62611e-08	5.32102e-07
ENSMUSG00000112658.1	Gm47395	2.64904	1.31705	1.63358e-08	5.34204e-07
ENSMUSG00000103786.1	Gm37525	2.0298	0.543046	1.65215e-08	5.38816e-07
ENSMUSG00000031104.2	Rab33a	2.49288	4.03064	1.65079e-08	5.38816e-07
ENSMUSG00000014470.4	Rnf166	1.67103	0.291683	1.65665e-08	5.39675e-07
ENSMUSG00000090665.2	Gad1-ps	1.97895	-0.0986126	1.6706e-08	5.43178e-07
ENSMUSG00000073532.2	Gm7276	1.76583	0.308886	1.67406e-08	5.43957e-07
ENSMUSG00000089041.1	NA	2.47608	0.0712135	1.70812e-08	5.53967e-07
ENSMUSG00000099812.1	Gm28515	1.85299	0.0885982	1.73117e-08	5.60928e-07
ENSMUSG00000033015.16	4933427E13Rik	1.86968	0.519375	1.73178e-08	5.60928e-07
ENSMUSG00000082646.1	Gm12732	2.01563	-0.176766	1.74421e-08	5.64595e-07
ENSMUSG00000116759.1	Gm49666	1.96057	0.41277	1.74884e-08	5.65736e-07
ENSMUSG00000036752.4	Tubb4b	1.7581	0.995818	1.79728e-08	5.81037e-07
ENSMUSG00000021892.14	Sh3bp5	1.62734	1.30765	1.82649e-08	5.90106e-07
ENSMUSG00000097292.2	A230107N01Rik	1.75852	0.0689468	1.82915e-08	5.90591e-07
ENSMUSG00000115919.1	Gm31583	1.77343	0.654939	1.85062e-08	5.95894e-07
ENSMUSG00000098622.1	NA	2.11625	-0.398994	1.8501e-08	5.95894e-07
ENSMUSG00000082573.1	Gm11903	2.66425	1.19813	1.86212e-08	5.98963e-07
ENSMUSG00000039782.14	Cpeb2	1.45258	2.09019	1.95002e-08	6.25662e-07
ENSMUSG00000044703.5	Phf11a	2.36743	0.186459	2.00256e-08	6.41713e-07
ENSMUSG00000097180.5	2700038G22Rik	1.96645	0.481377	2.02255e-08	6.4771e-07
ENSMUSG00000106584.1	4930502C17Rik	2.05193	-0.262694	2.03506e-08	6.51308e-07
ENSMUSG00000018677.9	Slc25a39	1.64157	1.32135	2.07951e-08	6.65118e-07
ENSMUSG00000114034.1	Gm9267	2.14713	-0.126729	2.1168e-08	6.75775e-07
ENSMUSG00000023110.12	Prmt5	1.63643	1.58707	2.13002e-08	6.79146e-07
ENSMUSG00000020009.13	Ifngr1	1.75742	0.257187	2.14273e-08	6.82344e-07
ENSMUSG00000014980.14	Tsen15	1.72357	0.668482	2.1677e-08	6.89866e-07
ENSMUSG00000108345.1	4933435G04Rik	2.0706	1.29355	2.21891e-08	7.04884e-07
ENSMUSG00000085801.1	1700013N06Rik	2.43176	0.0296528	2.25081e-08	7.14089e-07
ENSMUSG00000109039.1	Gm33570	2.04085	-0.216575	2.2592e-08	7.16308e-07
ENSMUSG00000026019.15	Wdr12	1.40688	2.35162	2.27624e-08	7.20368e-07
ENSMUSG00000025271.13	Pfkfb1	1.61792	0.479845	2.2895e-08	7.24115e-07
ENSMUSG00000082963.1	Gm12465	3.00811	0.0541938	2.3011e-08	7.27334e-07
ENSMUSG00000034216.12	Vps18	1.51563	1.53043	2.33907e-08	7.38876e-07
ENSMUSG00000033554.17	Dph5	1.64264	2.01434	2.34891e-08	7.41527e-07
ENSMUSG00000025777.8	Gdap1	1.75235	2.14397	2.35395e-08	7.42659e-07
ENSMUSG00000027709.9	Mccc1	1.53066	1.75394	2.35946e-08	7.43476e-07
ENSMUSG00000077273.1	Gm22779	2.232	-0.328278	2.37886e-08	7.48668e-07
ENSMUSG00000060487.7	Samd5	1.50591	1.05109	2.38541e-08	7.50264e-07
ENSMUSG00000083553.1	Gm11989	1.9588	-0.0166602	2.41987e-08	7.60167e-07
ENSMUSG00000084210.1	Gm15168	1.94608	0.0626567	2.47698e-08	7.76675e-07
ENSMUSG00000098370.1	Gm19541	2.06271	0.477068	2.4823e-08	7.77864e-07
ENSMUSG00000025991.8	Cps1	1.64077	1.47335	2.4868e-08	7.78794e-07
ENSMUSG00000070870.6	Cryge	2.46305	-0.319115	2.50526e-08	7.84095e-07
ENSMUSG00000111899.1	Gm18636	2.11346	-0.0193119	2.51495e-08	7.86167e-07
ENSMUSG00000113204.1	Gm46430	2.00343	0.91342	2.55388e-08	7.97846e-07
ENSMUSG00000001520.12	Nrip2	2.18753	1.43873	2.58631e-08	8.06988e-07
ENSMUSG00000103042.1	Gm2719	2.24828	0.0753598	2.59136e-08	8.0807e-07
ENSMUSG00000113733.1	Gm34785	1.66214	0.489923	2.66015e-08	8.28591e-07
ENSMUSG00000000411.7	Tssk3	1.76371	0.24806	2.66041e-08	8.28591e-07
ENSMUSG00000039879.9	Heca	1.90416	2.77595	2.77888e-08	8.63908e-07
ENSMUSG00000033470.12	Cysltr2	1.74878	0.24781	2.85164e-08	8.83642e-07
ENSMUSG00000042078.14	Svop	1.40965	1.48129	2.86584e-08	8.85549e-07
ENSMUSG00000024002.17	Brd4	1.5012	1.86092	2.87986e-08	8.88267e-07
ENSMUSG00000055553.16	Kxd1	1.76265	1.04264	2.87853e-08	8.88267e-07
ENSMUSG00000107214.3	4930500F04Rik	2.00241	-0.0245288	2.9407e-08	9.05392e-07
ENSMUSG00000026688.5	Mgst3	2.11838	0.54826	2.94569e-08	9.06381e-07
ENSMUSG00000021772.15	Nkiras1	1.75522	0.635903	3.02e-08	9.26936e-07
ENSMUSG00000104619.1	Gm42678	2.2993	1.02594	3.02157e-08	9.26936e-07
ENSMUSG00000102215.1	Gm2464	1.69663	-0.182786	3.0795e-08	9.43005e-07
ENSMUSG00000092429.1	Tprgl-ps1	2.18953	0.0157197	3.09351e-08	9.46728e-07
ENSMUSG00000041986.16	Elmod1	1.89025	1.9151	3.16553e-08	9.66451e-07
ENSMUSG00000040345.10	Arhgap9	1.373	0.361212	3.22567e-08	9.83049e-07
ENSMUSG00000100277.8	1810053B23Rik	1.57214	1.42214	3.24182e-08	9.87381e-07
ENSMUSG00000021767.18	Kat6b	1.38789	2.27318	3.30486e-08	1.00478e-06
ENSMUSG00000041141.7	Pnmal1	1.72183	1.45485	3.36579e-08	1.02148e-06
ENSMUSG00000109740.1	Gm7561	1.99046	-0.0431834	3.4432e-08	1.04312e-06
ENSMUSG00000081658.1	Gm12077	1.89474	-0.393364	3.45243e-08	1.04529e-06
ENSMUSG00000027713.6	1810062G17Rik	2.05543	0.223722	3.49891e-08	1.05874e-06
ENSMUSG00000067430.7	Zfp763	1.53066	0.375417	3.51859e-08	1.06406e-06
ENSMUSG00000109372.1	Gm19410	1.71014	1.41988	3.55685e-08	1.07436e-06
ENSMUSG00000089757.1	NA	2.3009	0.144958	3.5842e-08	1.08198e-06
ENSMUSG00000080869.1	Gm11856	2.45371	0.270157	3.67459e-08	1.1073e-06
ENSMUSG00000031508.14	Ankrd10	1.4584	1.12252	3.71192e-08	1.11789e-06
ENSMUSG00000109266.1	Gm6426	1.81842	0.000461209	3.7312e-08	1.12303e-06
ENSMUSG00000043998.10	Mgat2	1.66385	1.23426	3.76407e-08	1.13226e-06
ENSMUSG00000106654.1	Gm2623	2.25277	-0.0407339	3.78949e-08	1.13856e-06
ENSMUSG00000046607.6	Hrk	1.49263	1.24186	3.81854e-08	1.14594e-06
ENSMUSG00000108865.1	Gm44617	1.52292	0.274405	3.84768e-08	1.15401e-06
ENSMUSG00000057174.5	Krtap19-9b	2.20556	-0.384719	3.85151e-08	1.15448e-06
ENSMUSG00000100235.8	Gm28557	2.05646	-0.107641	3.9083e-08	1.17013e-06
ENSMUSG00000040084.9	Bub1b	1.77017	0.765836	3.92559e-08	1.17462e-06
ENSMUSG00000109671.1	Olfr674-ps1	2.02119	-0.365471	3.94257e-08	1.17882e-06
ENSMUSG00000105622.1	Gm42615	2.226	0.575453	3.94426e-08	1.17882e-06
ENSMUSG00000021451.16	Sema4d	1.6117	1.25017	3.95397e-08	1.18034e-06
ENSMUSG00000024400.16	Wdr33	1.12579	2.09616	3.97064e-08	1.18462e-06
ENSMUSG00000070777.5	Ceacam20	1.92163	0.544941	3.97352e-08	1.18479e-06
ENSMUSG00000030042.15	Pole4	2.08348	0.791046	3.97992e-08	1.18601e-06
ENSMUSG00000097587.2	4930578M01Rik	1.46068	1.4832	3.98262e-08	1.18612e-06
ENSMUSG00000029695.13	Aass	1.69939	0.80283	3.98915e-08	1.18737e-06
ENSMUSG00000081873.1	Gm15197	2.24193	0.120124	4.00904e-08	1.19199e-06
ENSMUSG00000109316.1	Gm45160	2.03365	0.740279	4.03681e-08	1.19946e-06
ENSMUSG00000021366.8	Hivep1	1.66177	1.89436	4.05601e-08	1.20446e-06
ENSMUSG00000053198.13	Prx	1.52605	0.268681	4.06395e-08	1.2057e-06
ENSMUSG00000114852.1	Gm47189	1.92909	-0.374662	4.06491e-08	1.2057e-06
ENSMUSG00000031302.16	Nlgn3	1.76246	1.26344	4.1428e-08	1.22738e-06
ENSMUSG00000058835.14	Abi1	2.14268	1.90662	4.15496e-08	1.23027e-06
ENSMUSG00000021919.8	Chat	1.67072	1.24224	4.17463e-08	1.23538e-06
ENSMUSG00000080729.1	Gm8084	2.44719	0.108624	4.19549e-08	1.24083e-06
ENSMUSG00000083728.1	Gm13854	1.69443	0.0118172	4.20525e-08	1.24273e-06
ENSMUSG00000082093.2	Gm15928	2.36331	0.0727197	4.20677e-08	1.24273e-06
ENSMUSG00000024078.7	Ttc27	1.52645	0.5218	4.20936e-08	1.24277e-06
ENSMUSG00000021076.6	Actr10	1.75759	2.59226	4.25525e-08	1.25559e-06
ENSMUSG00000105719.1	Gm42872	2.31207	1.08906	4.28449e-08	1.26349e-06
ENSMUSG00000074030.3	Exoc8	1.35479	1.10132	4.2935e-08	1.26542e-06
ENSMUSG00000095663.1	Gm2310	1.88702	-0.459162	4.30718e-08	1.26872e-06
ENSMUSG00000109050.1	Gm6290	2.07192	0.396537	4.31884e-08	1.27142e-06
ENSMUSG00000111924.1	4930556N09Rik	2.04043	0.276756	4.33451e-08	1.2753e-06
ENSMUSG00000103920.1	Gm37897	1.67375	0.327281	4.33883e-08	1.27583e-06
ENSMUSG00000085732.1	Gm4279	1.85981	0.639444	4.35244e-08	1.27836e-06
ENSMUSG00000030158.12	Clec12b	1.86757	-0.100198	4.38981e-08	1.2886e-06
ENSMUSG00000026254.17	Eif4e2	1.53013	1.30093	4.43432e-08	1.30091e-06
ENSMUSG00000048249.14	Crebrf	1.68342	1.78725	4.45658e-08	1.30594e-06
ENSMUSG00000084788.2	Gm11342	1.87581	0.425865	4.48307e-08	1.31295e-06
ENSMUSG00000037568.12	Vash2	1.30157	0.259731	4.56968e-08	1.33755e-06
ENSMUSG00000095513.1	NA	2.24043	-0.261056	4.59156e-08	1.34318e-06
ENSMUSG00000085172.1	Gm6542	2.09754	0.5223	4.67266e-08	1.36378e-06
ENSMUSG00000106598.1	Gm43532	1.96734	0.944659	4.69025e-08	1.36813e-06
ENSMUSG00000115337.1	4930570B17Rik	1.96835	-0.0718028	4.75706e-08	1.38683e-06
ENSMUSG00000024038.16	Ndufv3	1.60252	0.803705	4.77328e-08	1.38997e-06
ENSMUSG00000019732.14	Calr3	1.88766	0.870268	4.856e-08	1.41244e-06
ENSMUSG00000038604.9	Ripor1	1.39362	1.10895	4.89209e-08	1.42213e-06
ENSMUSG00000105917.1	Gm43612	2.12607	0.548847	4.90687e-08	1.42562e-06
ENSMUSG00000111424.1	Gm48478	1.61192	-0.0890504	4.9192e-08	1.42839e-06
ENSMUSG00000079852.4	Klra4	2.89171	2.64126	5.09313e-08	1.47721e-06
ENSMUSG00000084147.1	Gm15075	2.24139	-0.218353	5.18523e-08	1.50136e-06
ENSMUSG00000108442.1	Rpl15-ps5	2.33806	0.155725	5.18343e-08	1.50136e-06
ENSMUSG00000034981.9	Parm1	1.63924	0.923496	5.22198e-08	1.51029e-06
ENSMUSG00000094487.1	Gm21958	2.23688	-0.184486	5.24844e-08	1.51623e-06
ENSMUSG00000082613.1	Gm12518	1.86973	-0.356696	5.27253e-08	1.52146e-06
ENSMUSG00000012848.15	Rps5	2.34106	2.22208	5.29203e-08	1.52623e-06
ENSMUSG00000100400.1	Gm29326	1.58525	-0.231461	5.31461e-08	1.53101e-06
ENSMUSG00000072589.4	Gm10371	1.91785	0.845814	5.31446e-08	1.53101e-06
ENSMUSG00000039519.6	Cyp7b1	1.47406	0.0595698	5.33609e-08	1.53546e-06
ENSMUSG00000114959.1	G630093K05Rik	1.82187	0.709691	5.34413e-08	1.53605e-06
ENSMUSG00000087121.1	Gm7847	2.06448	-0.23399	5.34291e-08	1.53605e-06
ENSMUSG00000107359.1	Gm43295	1.94604	-0.237518	5.37195e-08	1.54317e-06
ENSMUSG00000027776.12	Il12a	1.82511	0.415942	5.38182e-08	1.54514e-06
ENSMUSG00000115378.1	Gm39653	2.53048	0.854186	5.43314e-08	1.559e-06
ENSMUSG00000106095.2	2010110G14Rik	1.72515	-0.270343	5.43801e-08	1.55952e-06
ENSMUSG00000034456.15	Uroc1	1.4301	-0.0596005	5.48282e-08	1.56972e-06
ENSMUSG00000068606.5	Gm4841	1.74184	0.0161198	5.50749e-08	1.5759e-06
ENSMUSG00000098895.1	Gm21013	1.56774	-0.366409	5.51308e-08	1.57624e-06
ENSMUSG00000081237.3	Gm11385	2.03075	-0.442391	5.51486e-08	1.57624e-06
ENSMUSG00000081036.1	Gm14628	2.5256	0.129191	5.52426e-08	1.57805e-06
ENSMUSG00000114185.1	Gm47662	2.04975	0.820563	5.57746e-08	1.59235e-06
ENSMUSG00000028559.17	Osbpl9	1.53335	1.24554	5.627e-08	1.60463e-06
ENSMUSG00000039917.10	Rhbdd2	1.61255	1.42126	5.62989e-08	1.60463e-06
ENSMUSG00000111999.1	Gm5080	2.12069	0.812698	5.6497e-08	1.60938e-06
ENSMUSG00000027249.15	F2	1.75947	1.12273	5.66922e-08	1.61314e-06
ENSMUSG00000024575.15	Pde6a	1.4839	1.36471	5.76735e-08	1.63832e-06
ENSMUSG00000117023.1	Gm49876	1.94402	-0.258533	5.83665e-08	1.65616e-06
ENSMUSG00000047261.9	Gap43	1.9971	1.71042	5.85402e-08	1.66017e-06
ENSMUSG00000078566.8	Bnip3	2.03773	0.372491	5.90705e-08	1.67335e-06
ENSMUSG00000117125.1	Gm49836	2.36857	0.141059	5.92502e-08	1.67671e-06
ENSMUSG00000057997.6	Olfr541	2.37544	0.0585595	5.92548e-08	1.67671e-06
ENSMUSG00000073293.4	Nudt10	2.24004	1.33768	5.9692e-08	1.68814e-06
ENSMUSG00000001783.3	Rtcb	2.25644	1.2322	5.98619e-08	1.69201e-06
ENSMUSG00000037058.15	Paip2	2.25998	1.74182	6.089e-08	1.71822e-06
ENSMUSG00000088433.1	NA	2.11943	-0.407551	6.18442e-08	1.74225e-06
ENSMUSG00000049124.3	Gm8186	2.00108	0.268668	6.23609e-08	1.75487e-06
ENSMUSG00000023764.18	Sfi1	1.42168	2.49539	6.24018e-08	1.75505e-06
ENSMUSG00000026580.16	Selp	1.80851	1.22071	6.3692e-08	1.79036e-06
ENSMUSG00000020884.15	Asgr1	1.64795	-0.270555	6.38793e-08	1.79364e-06
ENSMUSG00000116826.1	Gm49682	2.64037	0.216564	6.38711e-08	1.79364e-06
ENSMUSG00000072704.6	Smim10l1	1.76276	1.07125	6.46855e-08	1.81528e-06
ENSMUSG00000107465.1	Gm5990	1.99091	-0.165768	6.47437e-08	1.81592e-06
ENSMUSG00000102373.1	9530018H14Rik	1.74446	-0.116132	6.52364e-08	1.82873e-06
ENSMUSG00000026878.17	Rab14	1.33001	2.20395	6.57805e-08	1.84196e-06
ENSMUSG00000109387.1	Gm45182	2.07118	1.40152	6.60322e-08	1.848e-06
ENSMUSG00000031928.15	Mre11a	1.81324	2.17319	6.62685e-08	1.85359e-06
ENSMUSG00000092276.2	1700116B05Rik	2.21439	-0.298272	6.64021e-08	1.85631e-06
ENSMUSG00000010057.8	Nprl2	1.61769	0.356045	6.8458e-08	1.91169e-06
ENSMUSG00000114007.1	Gm48660	1.86588	-0.414611	6.89257e-08	1.9237e-06
ENSMUSG00000089689.1	Gm4982	1.99503	-0.402993	6.94397e-08	1.93699e-06
ENSMUSG00000055360.13	Prl2c5	2.41147	0.807149	6.98125e-08	1.94632e-06
ENSMUSG00000102577.1	Gm37969	1.77515	1.05774	6.99981e-08	1.94937e-06
ENSMUSG00000106396.1	Gm42902	2.02025	-0.0542923	7.10134e-08	1.97656e-06
ENSMUSG00000094214.1	NA	2.07803	-0.258278	7.27567e-08	2.02068e-06
ENSMUSG00000115543.1	B230362B09Rik	1.87007	0.0563694	7.30213e-08	2.02693e-06
ENSMUSG00000026240.12	Cops7b	1.46046	1.83038	7.35221e-08	2.0375e-06
ENSMUSG00000115803.1	Gm35496	1.89784	-0.221881	7.40183e-08	2.05014e-06
ENSMUSG00000081083.1	Gm6079	2.15725	-0.304317	7.50025e-08	2.07515e-06
ENSMUSG00000107968.1	Gm44419	2.67099	0.321884	7.60226e-08	2.10224e-06
ENSMUSG00000105451.1	Gm43220	2.09364	-0.402761	7.70083e-08	2.12834e-06
ENSMUSG00000110302.1	Gm45295	1.77775	0.301781	7.7115e-08	2.12957e-06
ENSMUSG00000103890.1	Gm28724	2.18014	-0.179705	7.81615e-08	2.15671e-06
ENSMUSG00000060288.13	Ppih	2.01575	1.94664	7.84469e-08	2.16225e-06
ENSMUSG00000004530.12	Coro1c	1.33837	1.28681	7.89237e-08	2.17304e-06
ENSMUSG00000107352.1	Gm43660	1.42125	0.988051	7.9117e-08	2.17719e-06
ENSMUSG00000108718.1	Gm44749	1.92632	0.225857	7.95287e-08	2.18616e-06
ENSMUSG00000029330.8	Cds1	1.68783	0.945478	8.00484e-08	2.19789e-06
ENSMUSG00000028931.11	Kcnab2	1.38527	1.00606	8.27922e-08	2.26792e-06
ENSMUSG00000013936.12	Myl2	1.53229	0.124029	8.29338e-08	2.26998e-06
ENSMUSG00000106975.1	Olfr428-ps1	1.96923	-0.355394	8.30379e-08	2.27162e-06
ENSMUSG00000108914.1	Gm44908	2.26758	-0.315062	8.30826e-08	2.27162e-06
ENSMUSG00000072109.11	A530040E14Rik	1.89151	0.177692	8.33472e-08	2.27604e-06
ENSMUSG00000106802.1	Gm42885	1.83292	1.13324	8.34616e-08	2.27711e-06
ENSMUSG00000117262.1	Gm9316	1.78725	0.455581	8.49809e-08	2.31732e-06
ENSMUSG00000117563.1	Gm7575	1.60724	0.19747	8.52265e-08	2.32278e-06
ENSMUSG00000011350.15	Gm5893	1.49716	0.912779	8.58016e-08	2.3372e-06
ENSMUSG00000059488.3	Olfr727	1.89076	0.93582	8.6029e-08	2.34215e-06
ENSMUSG00000036751.7	Cox6b1	2.56107	1.51216	8.71652e-08	2.37181e-06
ENSMUSG00000080655.1	NA	2.03206	-0.429093	8.77988e-08	2.38778e-06
ENSMUSG00000042284.10	Itga1	1.4946	2.7503	8.81721e-08	2.39666e-06
ENSMUSG00000021012.16	Zc3h14	1.65674	1.74026	8.93038e-08	2.42613e-06
ENSMUSG00000027165.16	Iftap	1.71396	0.787267	9.01563e-08	2.44798e-06
ENSMUSG00000028394.9	Pole3	1.7315	1.26987	9.08223e-08	2.46476e-06
ENSMUSG00000100636.1	Gm3551	2.12507	-0.208643	9.14949e-08	2.48169e-06
ENSMUSG00000095788.6	Sirpb1a	1.94496	0.108927	9.22576e-08	2.50105e-06
ENSMUSG00000113516.1	Gm47368	2.38178	0.14966	9.34509e-08	2.53205e-06
ENSMUSG00000056459.14	Zbtb25	1.60493	0.320887	9.38581e-08	2.54174e-06
ENSMUSG00000100527.1	Gm28359	1.95848	-0.069194	9.47973e-08	2.56445e-06
ENSMUSG00000106699.1	Gm43224	2.21099	-0.348293	9.61158e-08	2.59874e-06
ENSMUSG00000059772.12	Slx1b	1.1301	2.37308	1.00869e-07	2.72277e-06
ENSMUSG00000027902.8	Chil6	2.43346	1.08992	1.00983e-07	2.72312e-06
ENSMUSG00000086806.1	Gm13054	1.75654	-0.370106	1.01197e-07	2.72745e-06
ENSMUSG00000048537.16	Phldb1	1.39904	0.951613	1.01488e-07	2.73385e-06
ENSMUSG00000029826.14	Zc3hav1	1.62697	1.55494	1.01575e-07	2.73474e-06
ENSMUSG00000067231.4	Cyp2c65	2.01816	0.46408	1.01781e-07	2.73886e-06
ENSMUSG00000114777.1	Gm46427	2.56116	-0.201326	1.02983e-07	2.76684e-06
ENSMUSG00000058192.16	Zfp846	1.371	2.10647	1.06528e-07	2.86056e-06
ENSMUSG00000023919.7	Cenpq	1.59528	0.365169	1.08007e-07	2.89876e-06
ENSMUSG00000100346.2	Gm28996	2.03627	-0.0485929	1.08173e-07	2.90168e-06
ENSMUSG00000047293.7	Gpr15	1.5769	-0.0274441	1.09193e-07	2.92331e-06
ENSMUSG00000115799.1	Vmn1r19	1.91554	-0.0904284	1.09208e-07	2.92331e-06
ENSMUSG00000071867.5	Mrpl27-ps	2.16708	0.0301734	1.0952e-07	2.93012e-06
ENSMUSG00000105003.1	Gm40055	1.62257	0.00560436	1.10366e-07	2.95121e-06
ENSMUSG00000106538.1	Gm30301	1.86976	-0.242603	1.10638e-07	2.95539e-06
ENSMUSG00000026311.16	Asb1	1.53811	1.55783	1.11773e-07	2.98103e-06
ENSMUSG00000108800.1	1700011C11Rik	2.11285	-0.124499	1.12655e-07	3.00298e-06
ENSMUSG00000033177.13	Tmprss7	1.62402	0.458608	1.14405e-07	3.04486e-06
ENSMUSG00000116551.1	Gm41517	1.87989	-0.167844	1.16283e-07	3.08999e-06
ENSMUSG00000097858.2	9530052C20Rik	2.03086	-0.340069	1.18201e-07	3.13609e-06
ENSMUSG00000079630.2	Rhox4f	2.12849	0.182427	1.18672e-07	3.1453e-06
ENSMUSG00000017204.4	Gsdma	1.70388	1.03489	1.19357e-07	3.16181e-06
ENSMUSG00000074781.5	Ube2n	2.2871	2.12518	1.21399e-07	3.21424e-06
ENSMUSG00000003271.17	Sult2b1	1.5896	1.17604	1.21573e-07	3.21718e-06
ENSMUSG00000113755.1	Gm46391	2.14872	-0.136219	1.22849e-07	3.24925e-06
ENSMUSG00000103317.1	Gm38359	1.70281	-0.0178744	1.26544e-07	3.34007e-06
ENSMUSG00000074555.5	Gm10714	1.50509	-0.278238	1.29186e-07	3.40804e-06
ENSMUSG00000086603.1	Gm13620	1.84053	-0.21653	1.30431e-07	3.43912e-06
ENSMUSG00000032330.7	Cox7a2	2.24823	1.59725	1.31726e-07	3.46968e-06
ENSMUSG00000081951.1	Gm15352	1.82532	-0.273319	1.32744e-07	3.49469e-06
ENSMUSG00000117200.1	Gm49905	2.20218	0.508968	1.36254e-07	3.58524e-06
ENSMUSG00000089862.8	Umad1	1.80649	1.43744	1.39615e-07	3.668e-06
ENSMUSG00000105731.1	Gm43063	2.13776	0.870711	1.41604e-07	3.71834e-06
ENSMUSG00000087374.1	Gm15457	1.6124	0.364411	1.42485e-07	3.73762e-06
ENSMUSG00000080815.1	Hmgb1-rs18	1.89473	-0.234698	1.43044e-07	3.75036e-06
ENSMUSG00000029098.17	Acox3	1.77987	2.43989	1.46813e-07	3.84325e-06
ENSMUSG00000112505.1	Gm48610	1.68597	-0.359913	1.47132e-07	3.84964e-06
ENSMUSG00000112758.1	Gm36172	2.09794	-0.228164	1.51605e-07	3.96262e-06
ENSMUSG00000054716.4	Zfp771	1.54829	0.93332	1.52589e-07	3.98629e-06
ENSMUSG00000110430.2	Cmtm1	1.69331	-0.399136	1.52812e-07	3.99007e-06
ENSMUSG00000023460.13	Rab12	1.42239	0.74549	1.52965e-07	3.99203e-06
ENSMUSG00000114827.1	Gm46432	2.1603	-0.0521182	1.53174e-07	3.99545e-06
ENSMUSG00000028158.14	Mttp	1.31211	1.30702	1.56686e-07	4.08496e-06
ENSMUSG00000039157.12	Fam102a	1.38071	0.871011	1.59487e-07	4.15161e-06
ENSMUSG00000030704.14	Rab6a	1.87194	6.03647	1.59605e-07	4.15258e-06
ENSMUSG00000080772.1	Gm12543	2.22724	-0.102007	1.60704e-07	4.1769e-06
ENSMUSG00000079170.3	Gm13941	1.86129	-0.0806824	1.6268e-07	4.22183e-06
ENSMUSG00000114770.1	4921522A10Rik	1.95194	-0.314805	1.6449e-07	4.26013e-06
ENSMUSG00000080078.2	Gm15583	1.7249	-0.296717	1.68172e-07	4.34827e-06
ENSMUSG00000081319.1	Gm12936	1.91936	0.530896	1.70563e-07	4.40178e-06
ENSMUSG00000111777.1	Gm47147	1.78989	-0.331596	1.70813e-07	4.40601e-06
ENSMUSG00000032688.8	Malt1	1.32171	2.12403	1.74236e-07	4.48751e-06
ENSMUSG00000060049.5	Olfr235	1.9658	0.124818	1.74357e-07	4.48834e-06
ENSMUSG00000016921.14	Srsf6	1.67338	1.40354	1.74818e-07	4.49796e-06
ENSMUSG00000113527.1	Gm48079	1.73679	-0.363011	1.78635e-07	4.58923e-06
ENSMUSG00000021991.9	Cacna2d3	1.39682	1.90691	1.80029e-07	4.6227e-06
ENSMUSG00000104524.1	Gm37333	1.90848	1.53124	1.80528e-07	4.63319e-06
ENSMUSG00000105796.1	Gm42845	2.3448	0.228459	1.83427e-07	4.69577e-06
ENSMUSG00000054920.12	Klhl5	1.49934	1.27646	1.84857e-07	4.73003e-06
ENSMUSG00000071302.10	2610044O15Rik8	1.99256	0.577915	1.85862e-07	4.75336e-06
ENSMUSG00000026313.16	Hdac4	1.20125	1.98672	1.86313e-07	4.7625e-06
ENSMUSG00000097476.1	Gm26583	1.6263	0.202652	1.86522e-07	4.76547e-06
ENSMUSG00000058704.9	Memo1	1.76351	1.692	1.86897e-07	4.77264e-06
ENSMUSG00000112547.1	Gm47096	2.12098	1.81094	1.87549e-07	4.78452e-06
ENSMUSG00000096722.2	Hmgb1-ps9	2.06096	-0.136842	1.87812e-07	4.78884e-06
ENSMUSG00000073721.5	Pramel15	1.90442	0.102267	1.88843e-07	4.81271e-06
ENSMUSG00000034641.2	Cd300ld	1.89789	1.10083	1.89525e-07	4.8277e-06
ENSMUSG00000047676.6	Rpsa-ps10	2.16212	0.633786	1.90654e-07	4.85402e-06
ENSMUSG00000102052.1	Gm28387	1.9658	0.364106	1.90877e-07	4.85727e-06
ENSMUSG00000009894.15	Snap47	1.8689	1.26028	1.93765e-07	4.9234e-06
ENSMUSG00000082237.2	Olfr1172-ps1	2.19134	-0.181804	1.9451e-07	4.93741e-06
ENSMUSG00000040464.15	Gtpbp10	1.68686	1.29888	1.9526e-07	4.954e-06
ENSMUSG00000097280.1	AI849053	1.54007	1.24283	1.96604e-07	4.98523e-06
ENSMUSG00000056025.12	Clca3a1	1.69348	0.505622	1.96686e-07	4.98523e-06
ENSMUSG00000081974.3	Gm11960	1.52289	0.449335	1.97909e-07	5.00692e-06
ENSMUSG00000102549.1	Gm38137	1.77134	-0.237411	1.97935e-07	5.00692e-06
ENSMUSG00000030909.6	Anks4b	1.58929	0.286263	2.00062e-07	5.05322e-06
ENSMUSG00000102322.1	4930566N20Rik	1.76259	-0.291396	2.00563e-07	5.06337e-06
ENSMUSG00000029328.15	Hnrnpdl	1.58774	2.47818	2.03722e-07	5.13551e-06
ENSMUSG00000045225.4	Olfr1152	1.47439	1.31511	2.06249e-07	5.19152e-06
ENSMUSG00000110761.1	Gm29761	1.55602	0.091808	2.06189e-07	5.19152e-06
ENSMUSG00000022187.2	Gm5546	1.98061	0.504286	2.06357e-07	5.19167e-06
ENSMUSG00000000606.17	Vmn2r88	1.96771	0.792923	2.06486e-07	5.19237e-06
ENSMUSG00000030591.17	Psmd8	2.16112	2.15661	2.07085e-07	5.20479e-06
ENSMUSG00000062373.8	Tmem65	1.58303	1.47316	2.0852e-07	5.23577e-06
ENSMUSG00000108314.1	Prkcz2	1.51344	0.564395	2.14177e-07	5.37516e-06
ENSMUSG00000103877.2	Gm21358	1.99876	0.351548	2.14476e-07	5.38003e-06
ENSMUSG00000019777.16	Hdac2	1.51106	1.04011	2.15161e-07	5.39347e-06
ENSMUSG00000111203.1	Gm48719	1.77922	-0.216859	2.15223e-07	5.39347e-06
ENSMUSG00000038576.15	Susd4	1.49306	1.9764	2.15833e-07	5.40609e-06
ENSMUSG00000039771.13	Polr2j	1.91578	0.108611	2.17104e-07	5.43259e-06
ENSMUSG00000018698.15	Lhx1	1.30309	1.08824	2.20382e-07	5.50115e-06
ENSMUSG00000113818.1	Gm7119	1.89553	-0.00413017	2.22958e-07	5.56001e-06
ENSMUSG00000108227.1	4933412L11Rik	1.88848	0.305275	2.24355e-07	5.5921e-06
ENSMUSG00000103959.2	Gm37720	1.89114	0.258594	2.24877e-07	5.6024e-06
ENSMUSG00000031595.9	Pdgfrl	1.52371	0.70442	2.25298e-07	5.61014e-06
ENSMUSG00000003868.14	Ruvbl2	1.36587	0.496088	2.25564e-07	5.61403e-06
ENSMUSG00000083921.2	Gm15750	1.88402	0.0100739	2.27873e-07	5.66421e-06
ENSMUSG00000108038.1	D030044L04Rik	2.02312	0.615774	2.27913e-07	5.66421e-06
ENSMUSG00000114837.1	Gm48090	2.1437	0.740046	2.30286e-07	5.7204e-06
ENSMUSG00000004667.18	Polr2e	1.6409	1.0028	2.35276e-07	5.83866e-06
ENSMUSG00000112488.1	Gm33981	2.16804	-0.10585	2.35168e-07	5.83866e-06
ENSMUSG00000020921.6	Tmem101	1.50915	0.903145	2.37178e-07	5.88016e-06
ENSMUSG00000104529.4	Rbakdn	1.97094	0.208808	2.40341e-07	5.94991e-06
ENSMUSG00000074415.14	Mir100hg	1.28571	2.43018	2.44345e-07	6.0461e-06
ENSMUSG00000114054.1	Gm47706	1.82864	-0.383666	2.46416e-07	6.09143e-06
ENSMUSG00000028351.5	Brinp1	1.5865	1.99903	2.46797e-07	6.09493e-06
ENSMUSG00000079575.3	Rbpj-ps3	1.8108	-0.179604	2.46949e-07	6.09576e-06
ENSMUSG00000087687.3	Pet100	1.88687	1.24293	2.47153e-07	6.09783e-06
ENSMUSG00000002500.15	Rpl3l	1.83038	0.301534	2.49717e-07	6.15406e-06
ENSMUSG00000062896.3	Rpl31-ps11	2.09336	0.471233	2.5195e-07	6.2042e-06
ENSMUSG00000110611.1	Gm20163	1.63886	0.0745795	2.52147e-07	6.20605e-06
ENSMUSG00000108764.1	Gm2926	2.35485	-0.0120648	2.54558e-07	6.25634e-06
ENSMUSG00000004633.17	Chn2	1.52043	1.09897	2.57272e-07	6.31695e-06
ENSMUSG00000083687.1	Gm15154	2.0659	-0.297936	2.57224e-07	6.31695e-06
ENSMUSG00000115366.1	Gm9298	2.21987	0.827749	2.5911e-07	6.35903e-06
ENSMUSG00000115245.1	4930478E11Rik	1.56982	-0.0644565	2.60303e-07	6.38218e-06
ENSMUSG00000108614.1	2610306O10Rik	1.94115	-0.247474	2.6045e-07	6.3827e-06
ENSMUSG00000030122.12	Ptms	1.69954	0.54727	2.62147e-07	6.41814e-06
ENSMUSG00000072235.6	Tuba1a	2.687	5.05489	2.62712e-07	6.4289e-06
ENSMUSG00000020838.12	Slc6a4	1.84075	1.76126	2.69468e-07	6.59106e-06
ENSMUSG00000029430.13	Ran	1.80419	2.33142	2.72512e-07	6.65912e-06
ENSMUSG00000086730.2	Platr12	1.51539	-0.311699	2.74023e-07	6.68964e-06
ENSMUSG00000081610.1	Gm13733	1.96223	-0.381686	2.7515e-07	6.71394e-06
ENSMUSG00000004558.15	Ndrg2	2.03849	3.46675	2.76979e-07	6.75534e-06
ENSMUSG00000104512.1	Gm37165	1.83395	-0.122489	2.77213e-07	6.75782e-06
ENSMUSG00000110010.1	Gm45629	1.9874	0.453616	2.77467e-07	6.76078e-06
ENSMUSG00000019370.10	Calm3	1.53799	1.50516	2.82101e-07	6.86387e-06
ENSMUSG00000077177.1	Gm25760	2.02074	-0.425716	2.82599e-07	6.87272e-06
ENSMUSG00000109063.1	Gm44961	1.73887	-0.377056	2.83197e-07	6.88399e-06
ENSMUSG00000068888.3	Lce1i	2.34124	-0.179113	2.86699e-07	6.96248e-06
ENSMUSG00000026074.15	Map4k4	1.29865	1.84748	2.89254e-07	7.02118e-06
ENSMUSG00000051236.13	Msrb3	1.23824	0.448193	2.89535e-07	7.02466e-06
ENSMUSG00000033486.14	Catsper2	1.73932	1.25172	2.9111e-07	7.04947e-06
ENSMUSG00000109728.1	Gm45359	1.71849	-0.446124	2.92478e-07	7.07924e-06
ENSMUSG00000082464.3	Rab9b-ps1	1.91774	-0.214642	2.94869e-07	7.13035e-06
ENSMUSG00000022557.11	Bop1	1.60376	1.12557	2.97973e-07	7.20199e-06
ENSMUSG00000116783.1	Gm6048	1.51495	-0.28767	2.9899e-07	7.21976e-06
ENSMUSG00000030629.15	Zfand6	1.5566	2.12167	2.98871e-07	7.21976e-06
ENSMUSG00000115147.1	Gm5219	1.54428	-0.216005	3.02962e-07	7.30528e-06
ENSMUSG00000089408.1	Gm24885	2.11199	-0.323651	3.03241e-07	7.30857e-06
ENSMUSG00000094806.2	Cyp2d10	2.0396	-0.232899	3.06019e-07	7.37204e-06
ENSMUSG00000075587.5	Gm11531	2.08294	0.926655	3.06817e-07	7.38778e-06
ENSMUSG00000002204.9	Napsa	1.79735	1.29566	3.07193e-07	7.39155e-06
ENSMUSG00000083748.1	Gm11662	2.11881	0.296799	3.07263e-07	7.39155e-06
ENSMUSG00000114097.1	Gm35615	1.85526	-0.166883	3.08426e-07	7.41601e-06
ENSMUSG00000062127.11	Cttnbp2nl	1.4795	0.752698	3.11059e-07	7.4723e-06
ENSMUSG00000081056.1	Gm13998	2.15856	0.219722	3.11389e-07	7.4767e-06
ENSMUSG00000003161.15	Sri	1.57211	1.47605	3.12278e-07	7.49454e-06
ENSMUSG00000111970.1	Gm47715	1.86102	-0.0714287	3.1301e-07	7.50857e-06
ENSMUSG00000093766.1	Gm20679	1.90411	-0.0603926	3.13549e-07	7.51796e-06
ENSMUSG00000114275.1	Gm48534	2.24906	-0.124482	3.14098e-07	7.52758e-06
ENSMUSG00000055866.9	Per2	2.8385	8.38657	3.1773e-07	7.60748e-06
ENSMUSG00000117494.1	Gm49970	1.90509	0.88098	3.20592e-07	7.66881e-06
ENSMUSG00000113436.1	Gm48392	2.03953	-0.292245	3.28752e-07	7.86034e-06
ENSMUSG00000072476.6	Gm9008	1.80774	0.569864	3.33884e-07	7.96066e-06
ENSMUSG00000106562.1	Gm5981	1.83149	-0.16299	3.33813e-07	7.96066e-06
ENSMUSG00000076512.2	Igkv9-123	2.04037	-0.376223	3.33473e-07	7.96066e-06
ENSMUSG00000057072.11	Spata45	2.09122	-0.251	3.33673e-07	7.96066e-06
ENSMUSG00000033237.19	Arid2	1.45799	2.45662	3.36851e-07	8.02017e-06
ENSMUSG00000027606.12	Dnajc5b	1.86782	0.0934618	3.36749e-07	8.02017e-06
ENSMUSG00000090716.2	Gm3371	1.99247	-0.331974	3.36649e-07	8.02017e-06
ENSMUSG00000114092.1	Gm47418	1.68726	-0.324309	3.37688e-07	8.03259e-06
ENSMUSG00000111533.1	Gm39458	1.63962	0.100192	3.38495e-07	8.0443e-06
ENSMUSG00000099583.2	H3c4	1.865	0.141556	3.38365e-07	8.0443e-06
ENSMUSG00000076364.1	NA	1.8143	-0.329932	3.40033e-07	8.07709e-06
ENSMUSG00000087642.3	Ighe	1.69214	-0.126724	3.4068e-07	8.0887e-06
ENSMUSG00000059908.9	Mug1	1.95142	1.52476	3.42562e-07	8.1296e-06
ENSMUSG00000081344.5	Gm14303	2.09835	0.260282	3.4393e-07	8.15828e-06
ENSMUSG00000077718.1	Gm25723	2.28431	-0.113567	3.46758e-07	8.21772e-06
ENSMUSG00000115793.1	Gm48961	1.94392	0.355976	3.48343e-07	8.25146e-06
ENSMUSG00000117619.1	Gm50079	1.90444	0.187023	3.51437e-07	8.31701e-06
ENSMUSG00000113742.1	Gm48262	1.72407	0.64838	3.55769e-07	8.41563e-06
ENSMUSG00000114430.1	Gm40264	1.3825	0.485983	3.57314e-07	8.44827e-06
ENSMUSG00000038762.15	Abcf1	1.38001	1.12254	3.62952e-07	8.56997e-06
ENSMUSG00000033208.7	S100b	1.87692	0.681294	3.62965e-07	8.56997e-06
ENSMUSG00000103181.1	A330069K06Rik	1.7775	-0.0457441	3.63287e-07	8.57362e-06
ENSMUSG00000102579.1	Gm37965	1.93115	1.13087	3.63504e-07	8.57475e-06
ENSMUSG00000022223.9	Sdr39u1	2.22818	1.30191	3.6533e-07	8.61385e-06
ENSMUSG00000058567.6	Gm2531	2.11485	0.243898	3.6613e-07	8.62874e-06
ENSMUSG00000029559.15	2210016L21Rik	1.5259	1.02028	3.6747e-07	8.65632e-06
ENSMUSG00000043629.12	1700019D03Rik	1.52297	0.953444	3.74776e-07	8.82027e-06
ENSMUSG00000100212.1	Gm5522	1.75398	-0.184683	3.75554e-07	8.83044e-06
ENSMUSG00000030636.15	1700010L04Rik	1.58542	-0.00637376	3.76428e-07	8.84286e-06
ENSMUSG00000091528.8	Vmn2r-ps158	1.50271	-0.0189119	3.79685e-07	8.91117e-06
ENSMUSG00000110312.1	Gm45368	1.63492	-0.339169	3.85095e-07	9.03399e-06
ENSMUSG00000077472.1	Gm24791	2.29279	-0.23532	3.90689e-07	9.161e-06
ENSMUSG00000100711.1	Gm29461	1.51616	0.252174	3.91269e-07	9.17038e-06
ENSMUSG00000038848.14	Ythdf1	1.68668	1.2783	3.96244e-07	9.28273e-06
ENSMUSG00000068240.5	Gm11808	1.47042	-0.122786	3.98916e-07	9.34103e-06
ENSMUSG00000112763.1	Gm34304	1.50932	0.211895	4.01191e-07	9.38999e-06
ENSMUSG00000107944.1	Gm44280	1.29396	0.125045	4.01375e-07	9.39e-06
ENSMUSG00000060878.4	Olfr1420	1.51932	0.0206307	4.02054e-07	9.40159e-06
ENSMUSG00000065494.1	Mir28a	2.3982	-0.248572	4.04624e-07	9.45735e-06
ENSMUSG00000111937.1	Gm46203	1.98456	-0.0282944	4.05162e-07	9.46559e-06
ENSMUSG00000087020.1	Gm16283	1.85462	-0.139452	4.05834e-07	9.47695e-06
ENSMUSG00000081127.1	Gm12677	1.87321	-0.243688	4.10626e-07	9.58009e-06
ENSMUSG00000020652.17	Cenpo	1.38859	0.54406	4.11537e-07	9.59695e-06
ENSMUSG00000022094.15	Slc39a14	1.38572	1.45546	4.14266e-07	9.65618e-06
ENSMUSG00000042869.2	Olfr1370	1.66401	0.714743	4.18748e-07	9.75619e-06
ENSMUSG00000112361.1	Gm47607	1.73509	0.386149	4.19375e-07	9.76634e-06
ENSMUSG00000106669.1	Gm38433	2.14852	0.452006	4.19859e-07	9.77316e-06
ENSMUSG00000114963.1	Gm29010	1.67699	-0.182386	4.24504e-07	9.86778e-06
ENSMUSG00000073795.11	Spef1l	1.77825	0.385479	4.26481e-07	9.90922e-06
ENSMUSG00000016018.4	Mtrex	1.26015	1.04712	4.27173e-07	9.91628e-06
ENSMUSG00000083314.1	Gm11742	1.95157	-0.21736	4.2747e-07	9.91866e-06
ENSMUSG00000073481.9	Mtarc2	1.8627	2.3742	4.31239e-07	9.99703e-06
ENSMUSG00000105951.1	NA	2.06861	-0.242857	4.31132e-07	9.99703e-06
ENSMUSG00000026601.14	Axdnd1	1.27762	1.73954	4.39855e-07	1.01829e-05
ENSMUSG00000032754.14	Slc8b1	1.36675	0.208269	4.45564e-07	1.03057e-05
ENSMUSG00000089728.2	Clec2f	2.27911	0.110473	4.49814e-07	1.03946e-05
ENSMUSG00000111719.1	Gm19137	1.86058	-0.105168	4.50054e-07	1.03954e-05
ENSMUSG00000032342.13	Mto1	1.38616	1.20699	4.52163e-07	1.04394e-05
ENSMUSG00000020720.13	Psmd12	1.53891	1.39073	4.53767e-07	1.04717e-05
ENSMUSG00000087507.1	Gm16141	1.93686	0.344537	4.54943e-07	1.04941e-05
ENSMUSG00000085864.1	C330019F10Rik	1.52645	-0.0980431	4.55877e-07	1.05109e-05
ENSMUSG00000112620.1	Gm18972	1.84187	-0.0963756	4.58108e-07	1.05576e-05
ENSMUSG00000044501.17	Zfp758	1.66527	0.0440822	4.60768e-07	1.06104e-05
ENSMUSG00000117468.1	Gm7059	1.89799	0.669691	4.60815e-07	1.06104e-05
ENSMUSG00000042894.11	Olfr1260	1.41424	0.0524449	4.65106e-07	1.07044e-05
ENSMUSG00000087437.7	Gm13112	1.52419	0.508814	4.65567e-07	1.0709e-05
ENSMUSG00000104602.1	Gm42779	2.03743	-0.20685	4.65725e-07	1.0709e-05
ENSMUSG00000020990.5	Cdkl1	1.49369	0.447104	4.74005e-07	1.08944e-05
ENSMUSG00000114133.1	Gm20075	2.07058	0.572625	4.77406e-07	1.09627e-05
ENSMUSG00000069588.3	Gm11733	1.17993	0.0031371	4.79453e-07	1.09998e-05
ENSMUSG00000095384.1	1700001F09Rik	2.2728	1.03064	4.81542e-07	1.10428e-05
ENSMUSG00000099468.1	Gm28271	1.96851	-0.365802	4.83497e-07	1.10777e-05
ENSMUSG00000082617.3	Smt3h2-ps	1.85449	-0.252256	4.86156e-07	1.11286e-05
ENSMUSG00000105866.1	Gm6745	1.84212	-0.0478361	4.8754e-07	1.11553e-05
ENSMUSG00000031575.18	Ash2l	1.31772	1.42251	4.88004e-07	1.11609e-05
ENSMUSG00000061118.8	Dnajc30	1.51945	0.323047	4.88385e-07	1.11646e-05
ENSMUSG00000111621.1	Gm7802	2.10659	-0.0411614	4.92807e-07	1.12607e-05
ENSMUSG00000036295.5	Lrrn3	1.50103	0.818389	4.96075e-07	1.13252e-05
ENSMUSG00000038264.8	Sema7a	1.58865	0.202119	4.9682e-07	1.13371e-05
ENSMUSG00000024976.13	Shoc2	1.50269	1.0515	4.98974e-07	1.13761e-05
ENSMUSG00000087412.4	Gm15501	1.61841	0.0354921	4.98809e-07	1.13761e-05
ENSMUSG00000036492.12	Rnf39	1.70564	0.586767	5.10639e-07	1.16213e-05
ENSMUSG00000105965.1	Cycs-ps2	2.65627	1.76753	5.1448e-07	1.17035e-05
ENSMUSG00000083274.1	Zcchc9-ps	1.71481	-0.350125	5.15362e-07	1.17184e-05
ENSMUSG00000024830.16	Rps6kb2	1.42796	0.178969	5.18683e-07	1.17834e-05
ENSMUSG00000115455.1	Gm41219	1.78348	-0.388546	5.28801e-07	1.19972e-05
ENSMUSG00000064547.1	NA	2.22611	-0.229272	5.30179e-07	1.20213e-05
ENSMUSG00000116886.1	Gm49589	2.10202	0.0997925	5.3069e-07	1.2024e-05
ENSMUSG00000097456.7	Gm16958	1.7074	0.0404277	5.32349e-07	1.20509e-05
ENSMUSG00000094005.1	Gm12625	1.83447	-0.459488	5.33052e-07	1.20615e-05
ENSMUSG00000100662.1	Gm19029	1.74576	-0.425499	5.44371e-07	1.23012e-05
ENSMUSG00000082579.1	Gm11979	1.93045	-0.105396	5.52098e-07	1.24538e-05
ENSMUSG00000019303.14	Psmc3ip	1.49941	0.256204	5.53263e-07	1.24746e-05
ENSMUSG00000084661.1	Gm24635	2.40669	-0.254163	5.53702e-07	1.24789e-05
ENSMUSG00000030772.6	Dkk3	1.82105	2.33563	5.55804e-07	1.25097e-05
ENSMUSG00000088885.1	NA	2.25579	-0.281784	5.58226e-07	1.25587e-05
ENSMUSG00000023150.14	Ivns1abp	1.66604	1.54907	5.60277e-07	1.25993e-05
ENSMUSG00000028176.11	Lrrc7	1.33957	1.67245	5.62284e-07	1.26389e-05
ENSMUSG00000055102.15	Zfp819	1.72352	-0.014004	5.64413e-07	1.26812e-05
ENSMUSG00000107779.1	Gm43874	1.77124	0.599732	5.65153e-07	1.26922e-05
ENSMUSG00000083856.1	Gm13886	1.67266	-0.21879	5.659e-07	1.27034e-05
ENSMUSG00000113352.1	Gm34639	1.65092	0.0798834	5.72277e-07	1.28352e-05
ENSMUSG00000106332.1	Gm43506	1.98608	0.213574	5.72117e-07	1.28352e-05
ENSMUSG00000009076.10	Zmat5	1.54421	-0.194122	5.73168e-07	1.28496e-05
ENSMUSG00000025333.10	Gpr143	1.75443	0.319043	5.73537e-07	1.28522e-05
ENSMUSG00000110264.1	E330018M18Rik	1.98781	0.730627	5.74834e-07	1.28756e-05
ENSMUSG00000104095.1	Gm37315	1.77793	0.592917	5.82591e-07	1.30436e-05
ENSMUSG00000039166.16	Akap7	1.453	1.73974	5.86405e-07	1.31175e-05
ENSMUSG00000108316.1	Gm44589	2.04063	-0.354883	5.97218e-07	1.33477e-05
ENSMUSG00000044103.4	Il36g	1.61213	-0.186918	5.9769e-07	1.33519e-05
ENSMUSG00000108204.1	Gm44180	2.28251	-0.0665013	5.9921e-07	1.33688e-05
ENSMUSG00000083478.1	Gm15375	1.9687	-0.382019	6.00529e-07	1.33924e-05
ENSMUSG00000097747.1	NA	1.95025	0.325862	6.01376e-07	1.34054e-05
ENSMUSG00000086054.2	Hnf1aos1	1.43338	-0.244411	6.0479e-07	1.34757e-05
ENSMUSG00000044378.12	Slc15a5	1.47489	0.306145	6.06287e-07	1.35031e-05
ENSMUSG00000116388.1	Gm3749	1.41685	-0.486964	6.08511e-07	1.35467e-05
ENSMUSG00000038883.3	Prl3a1	1.47634	-0.218736	6.11214e-07	1.3601e-05
ENSMUSG00000113804.1	Gm46424	1.82356	0.0256559	6.23076e-07	1.38468e-05
ENSMUSG00000102147.1	Gm38055	1.57066	0.187287	6.24739e-07	1.38777e-05
ENSMUSG00000105981.1	2810428J06Rik	1.69999	0.396807	6.26862e-07	1.39188e-05
ENSMUSG00000031922.12	Cep57	1.36468	0.565462	6.33518e-07	1.40544e-05
ENSMUSG00000070263.1	Gm22365	2.18286	-0.130692	6.3518e-07	1.40852e-05
ENSMUSG00000083751.1	Gm14534	1.85342	-0.410538	6.3873e-07	1.41556e-05
ENSMUSG00000080778.1	Gm7199	1.99248	0.409902	6.43015e-07	1.42403e-05
ENSMUSG00000113580.1	Gm48237	1.69638	0.526061	6.46248e-07	1.42995e-05
ENSMUSG00000093479.1	Gm20629	1.86034	-0.339361	6.48096e-07	1.4328e-05
ENSMUSG00000054519.8	Zfp867	1.57353	0.942374	6.49375e-07	1.43501e-05
ENSMUSG00000087660.1	B230398E01Rik	1.48334	0.445439	6.53619e-07	1.44376e-05
ENSMUSG00000087702.1	Gm13575	1.62751	-0.18087	6.57803e-07	1.45175e-05
ENSMUSG00000023191.9	P3h3	1.43664	0.724655	6.60082e-07	1.45504e-05
ENSMUSG00000028234.6	Rps20	1.53414	1.58836	6.6015e-07	1.45504e-05
ENSMUSG00000100596.1	Gm29502	1.74291	0.719834	6.65209e-07	1.46492e-05
ENSMUSG00000108891.4	Olfr1291-ps1	1.4638	0.272768	6.66856e-07	1.46792e-05
ENSMUSG00000021194.6	Chga	1.40215	0.120301	6.70857e-07	1.47609e-05
ENSMUSG00000116455.1	Gm35974	1.60228	-0.291284	6.73675e-07	1.48165e-05
ENSMUSG00000113858.1	Gm4057	1.83873	-0.374625	6.78867e-07	1.49178e-05
ENSMUSG00000029782.19	Tmem209	1.20435	2.00315	6.80838e-07	1.49547e-05
ENSMUSG00000061474.11	Mrps36	1.71572	0.08045	6.83118e-07	1.49983e-05
ENSMUSG00000029108.14	Pcdh7	1.26628	2.1648	6.85321e-07	1.50402e-05
ENSMUSG00000102763.1	Gm37257	1.75028	-0.0558529	6.89804e-07	1.51321e-05
ENSMUSG00000111254.1	Gm48717	1.68338	0.0462893	6.92465e-07	1.5184e-05
ENSMUSG00000113035.1	5830428M24Rik	1.41033	1.50751	6.95371e-07	1.52346e-05
ENSMUSG00000108920.1	Gm44678	1.76504	1.95262	7.04959e-07	1.5438e-05
ENSMUSG00000083524.1	Mup-ps21	1.44003	-0.480057	7.08613e-07	1.55114e-05
ENSMUSG00000093394.1	Gm20621	1.66883	0.192389	7.11485e-07	1.55676e-05
ENSMUSG00000042557.14	Sin3a	1.43804	1.08007	7.1317e-07	1.55978e-05
ENSMUSG00000009214.9	Mymk	1.60832	-0.0262673	7.17595e-07	1.56878e-05
ENSMUSG00000097139.3	Gm26626	1.61097	-0.17514	7.22125e-07	1.57734e-05
ENSMUSG00000085744.1	Gm12259	2.03794	-0.254901	7.26616e-07	1.58579e-05
ENSMUSG00000103504.1	Gm38390	1.85241	-0.402126	7.2766e-07	1.58739e-05
ENSMUSG00000104037.1	Gm37776	1.53731	0.00673047	7.34961e-07	1.60263e-05
ENSMUSG00000077250.1	Gm26075	1.9382	-0.355477	7.59512e-07	1.65334e-05
ENSMUSG00000032212.10	Sltm	1.20945	2.0303	7.71038e-07	1.67629e-05
ENSMUSG00000070459.6	Olfr290	1.53825	1.68296	7.72135e-07	1.67796e-05
ENSMUSG00000084911.1	Gm16185	1.78446	1.06885	7.80056e-07	1.69445e-05
ENSMUSG00000050799.3	H2bc1	1.74218	-0.156915	7.92319e-07	1.71962e-05
ENSMUSG00000030590.15	Fam98c	1.4367	0.346496	7.95527e-07	1.72585e-05
ENSMUSG00000048755.9	Mcat	1.38	0.192867	7.99299e-07	1.7333e-05
ENSMUSG00000082021.1	Gm14991	1.77802	-0.369128	8.032e-07	1.74028e-05
ENSMUSG00000043692.6	Olfr399	2.05211	0.395967	8.08943e-07	1.75198e-05
ENSMUSG00000078713.8	Tomm5	1.77435	-0.264908	8.09562e-07	1.75257e-05
ENSMUSG00000080059.4	Rps19-ps3	2.11658	0.262528	8.10784e-07	1.75448e-05
ENSMUSG00000061311.6	Rag1	1.2487	0.283852	8.14759e-07	1.76233e-05
ENSMUSG00000032766.9	Gng11	1.71819	1.27697	8.18815e-07	1.77019e-05
ENSMUSG00000069441.3	Dsg1a	1.76345	0.594165	8.19085e-07	1.77019e-05
ENSMUSG00000033272.12	Slc35a4	1.54312	0.0987428	8.20768e-07	1.77307e-05
ENSMUSG00000106141.1	Gm18330	1.97749	-0.253041	8.23495e-07	1.77746e-05
ENSMUSG00000092077.2	Olfr101	1.70365	0.166621	8.2904e-07	1.78867e-05
ENSMUSG00000024231.15	Cul2	1.50743	1.12192	8.345e-07	1.79969e-05
ENSMUSG00000031257.14	Nox1	1.62268	0.303941	8.39014e-07	1.80866e-05
ENSMUSG00000117476.1	Gm9416	1.93353	-0.054754	8.4188e-07	1.81408e-05
ENSMUSG00000105485.1	Gm42447	1.7259	1.36331	8.47393e-07	1.82442e-05
ENSMUSG00000112031.1	Gm48484	1.47321	-0.467171	8.58024e-07	1.84652e-05
ENSMUSG00000029188.14	Slc34a2	1.52644	1.1453	8.5961e-07	1.84838e-05
ENSMUSG00000039270.9	Megf9	1.55942	1.5381	8.62637e-07	1.85333e-05
ENSMUSG00000020628.16	Trappc12	1.4641	2.35266	8.63086e-07	1.85351e-05
ENSMUSG00000114476.1	Gm21063	2.02849	0.621031	8.66241e-07	1.85951e-05
ENSMUSG00000020271.17	Fbxw11	1.3169	0.716155	8.73115e-07	1.87347e-05
ENSMUSG00000035775.2	Krt20	1.32432	0.368761	8.76167e-07	1.87765e-05
ENSMUSG00000020462.14	Cfap36	1.71273	0.764903	8.75976e-07	1.87765e-05
ENSMUSG00000093968.1	Gm8165	1.78361	-0.394484	8.76038e-07	1.87765e-05
ENSMUSG00000035944.17	Ttc38	1.48148	1.31582	8.81671e-07	1.88786e-05
ENSMUSG00000066687.5	Zbtb16	1.22729	0.650635	8.87129e-07	1.89875e-05
ENSMUSG00000039715.8	Dync2i2	1.33684	1.24897	8.87585e-07	1.89893e-05
ENSMUSG00000084653.1	NA	1.60548	-0.419659	9.01616e-07	1.92734e-05
ENSMUSG00000113738.1	Gm40910	1.72956	-0.30979	9.02896e-07	1.92927e-05
ENSMUSG00000079694.2	Gm14862	1.95112	0.77205	9.17223e-07	1.95824e-05
ENSMUSG00000104052.1	Gm38125	1.56939	0.533822	9.20153e-07	1.96285e-05
ENSMUSG00000104905.1	Gm43718	1.92674	0.668888	9.21557e-07	1.96503e-05
ENSMUSG00000019894.14	Slc6a15	1.26288	0.933249	9.24264e-07	1.96998e-05
ENSMUSG00000028397.13	Kdm4c	1.38921	1.11052	9.32644e-07	1.98618e-05
ENSMUSG00000083816.3	Gm13033	1.98023	0.422779	9.37692e-07	1.99609e-05
ENSMUSG00000059159.6	Gm8129	1.82714	-0.0382353	9.39849e-07	1.99985e-05
ENSMUSG00000046020.13	Pofut1	1.37507	1.51422	9.4038e-07	2.00015e-05
ENSMUSG00000101214.1	Gm28403	1.53367	-0.119443	9.42388e-07	2.00359e-05
ENSMUSG00000108185.1	Gm19653	1.42803	-0.363444	9.69552e-07	2.05819e-05
ENSMUSG00000100417.1	Gm28578	1.51696	0.547703	9.69191e-07	2.05819e-05
ENSMUSG00000105388.1	Rpl36a-ps2	1.92295	0.157221	9.83565e-07	2.08505e-05
ENSMUSG00000024426.17	Atat1	1.56168	1.17369	9.92759e-07	2.10192e-05
ENSMUSG00000091460.2	Gm7808	2.09149	0.0895744	9.9395e-07	2.10357e-05
ENSMUSG00000103175.1	Gm37169	1.6008	0.784212	9.98123e-07	2.11153e-05
ENSMUSG00000027673.12	Ndufb5	1.63762	1.23474	1.00315e-06	2.1204e-05
ENSMUSG00000020708.12	Psmc5	1.44091	0.72656	1.00573e-06	2.12497e-05
ENSMUSG00000090260.1	2810442N19Rik	1.62868	-0.257762	1.00936e-06	2.13088e-05
ENSMUSG00000102325.1	Gm37789	1.57571	0.416349	1.01087e-06	2.1332e-05
ENSMUSG00000114551.1	Gm6035	1.64509	0.329698	1.0122e-06	2.13511e-05
ENSMUSG00000015790.16	Surf1	1.65161	0.455642	1.01542e-06	2.14014e-05
ENSMUSG00000054640.15	Slc8a1	1.26205	2.99121	1.01845e-06	2.14388e-05
ENSMUSG00000035062.13	Zc4h2	1.7231	0.242992	1.01822e-06	2.14388e-05
ENSMUSG00000109542.2	Olfr470	1.75483	0.256202	1.01983e-06	2.14588e-05
ENSMUSG00000070923.4	Klhl9	1.35869	0.431371	1.02509e-06	2.15606e-05
ENSMUSG00000042810.14	Krba1	1.32275	1.3259	1.03062e-06	2.1668e-05
ENSMUSG00000081722.1	Gm11763	2.18969	-0.0167351	1.03648e-06	2.17734e-05
ENSMUSG00000022914.17	Brwd1	1.24065	2.23122	1.04114e-06	2.18622e-05
ENSMUSG00000104704.1	Gm43133	2.11211	0.543743	1.04768e-06	2.19905e-05
ENSMUSG00000026127.13	Imp4	1.30898	1.45696	1.04848e-06	2.19947e-05
ENSMUSG00000111703.1	Gm47161	1.61106	0.637401	1.04874e-06	2.19947e-05
ENSMUSG00000090812.8	Samd15	1.5728	1.14249	1.06538e-06	2.23069e-05
ENSMUSG00000042211.6	Fbxo38	1.42512	1.26483	1.0664e-06	2.23192e-05
ENSMUSG00000065088.1	NA	1.59784	-0.442341	1.08923e-06	2.27597e-05
ENSMUSG00000097191.2	Mm2pr	1.18101	0.187883	1.09771e-06	2.29275e-05
ENSMUSG00000029005.4	Draxin	1.23839	0.316823	1.11263e-06	2.32201e-05
ENSMUSG00000104339.1	C130089K02Rik	1.33154	1.44244	1.11476e-06	2.32552e-05
ENSMUSG00000048173.5	Olfr1324	2.21989	2.21574	1.12892e-06	2.35216e-05
ENSMUSG00000094189.1	Gm6134	1.8236	-0.317477	1.12972e-06	2.35288e-05
ENSMUSG00000029712.14	Actl6b	1.44754	0.842262	1.13559e-06	2.36256e-05
ENSMUSG00000004096.9	Cwc15	1.8097	0.968485	1.13576e-06	2.36256e-05
ENSMUSG00000085430.2	Gm15619	2.21989	0.596138	1.15734e-06	2.40548e-05
ENSMUSG00000079523.8	Tmsb10	1.61226	-0.0448669	1.15841e-06	2.40673e-05
ENSMUSG00000062054.7	Iah1	1.66854	0.129184	1.16524e-06	2.41895e-05
ENSMUSG00000087905.1	NA	1.43283	-0.433623	1.18088e-06	2.44943e-05
ENSMUSG00000106162.1	Gm43613	1.46804	-0.255514	1.18609e-06	2.45924e-05
ENSMUSG00000030385.4	2900092C05Rik	1.74811	0.172343	1.18876e-06	2.46377e-05
ENSMUSG00000031409.1	Tceal6	1.76837	-0.0767019	1.20403e-06	2.49239e-05
ENSMUSG00000021243.14	Fcf1	2.37022	1.65114	1.2179e-06	2.51905e-05
ENSMUSG00000117241.1	Gm9214	1.67473	0.583086	1.2184e-06	2.51906e-05
ENSMUSG00000083844.8	Ube2d-ps	1.41179	0.228419	1.21892e-06	2.51911e-05
ENSMUSG00000009293.17	Ube2g2	1.89105	0.268239	1.23098e-06	2.54198e-05
ENSMUSG00000076294.1	NA	1.73274	-0.456963	1.23321e-06	2.5435e-05
ENSMUSG00000055022.14	Cntn1	1.61034	2.4939	1.234e-06	2.54411e-05
ENSMUSG00000029580.14	Actb	1.47355	3.06874	1.24557e-06	2.56692e-05
ENSMUSG00000005469.10	Prkaca	1.60534	1.03441	1.24675e-06	2.56832e-05
ENSMUSG00000087633.1	Gm14455	1.35509	0.179996	1.24767e-06	2.56918e-05
ENSMUSG00000105110.1	Igkv12-66	1.76633	-0.402468	1.25053e-06	2.57299e-05
ENSMUSG00000110897.1	Gm47085	1.87458	0.400168	1.25264e-06	2.57526e-05
ENSMUSG00000040883.17	Tmem205	1.59596	0.897772	1.2575e-06	2.58316e-05
ENSMUSG00000063751.6	Platr8	1.7743	-0.0847265	1.27172e-06	2.61132e-05
ENSMUSG00000030359.14	Pzp	1.46511	2.41577	1.27371e-06	2.61225e-05
ENSMUSG00000051952.5	Olfr371	1.522	-0.339559	1.27368e-06	2.61225e-05
ENSMUSG00000082284.1	H3f3a-ps1	1.83926	0.180614	1.27933e-06	2.62168e-05
ENSMUSG00000104497.1	Gm10555	1.50808	-0.281781	1.28862e-06	2.6386e-05
ENSMUSG00000112633.1	Gm47627	1.56669	-0.449074	1.28968e-06	2.63971e-05
ENSMUSG00000050114.7	Prdx6b	1.67947	0.878581	1.29815e-06	2.65597e-05
ENSMUSG00000115334.1	Gm17923	1.75585	-0.221668	1.30021e-06	2.65815e-05
ENSMUSG00000024346.5	Pfdn1	2.03262	0.82246	1.30567e-06	2.66816e-05
ENSMUSG00000074034.1	Gm5921	1.60514	-0.159789	1.30683e-06	2.66945e-05
ENSMUSG00000075222.5	Olfr988	1.63719	-0.361542	1.31027e-06	2.67435e-05
ENSMUSG00000043298.8	Smco3	1.60084	0.0726935	1.3113e-06	2.67539e-05
ENSMUSG00000037098.17	Rab11fip3	1.2909	1.24973	1.31778e-06	2.68752e-05
ENSMUSG00000090102.1	Tesl2	2.06355	-0.0634384	1.32485e-06	2.69871e-05
ENSMUSG00000055531.12	Cpsf6	1.28523	1.58627	1.33525e-06	2.71772e-05
ENSMUSG00000104420.1	E230020A03Rik	1.44353	0.0325419	1.33516e-06	2.71772e-05
ENSMUSG00000063173.2	Olfr811	1.88977	0.0838736	1.33606e-06	2.71829e-05
ENSMUSG00000032575.16	Manf	1.56212	0.950204	1.34203e-06	2.72935e-05
ENSMUSG00000021548.10	Ccnh	1.71141	1.526	1.35436e-06	2.75224e-05
ENSMUSG00000022205.15	Sub1	1.68875	0.90671	1.36326e-06	2.76554e-05
ENSMUSG00000020405.4	Fabp6	1.83096	-0.123164	1.36322e-06	2.76554e-05
ENSMUSG00000033953.10	Ppp3r1	2.02933	3.35411	1.36934e-06	2.77384e-05
ENSMUSG00000105013.1	Gm7721	1.57238	-0.388553	1.37438e-06	2.78294e-05
ENSMUSG00000090965.1	Gm17203	1.57903	0.576947	1.38027e-06	2.79265e-05
ENSMUSG00000105401.1	Gm42949	1.80068	0.392182	1.38172e-06	2.79449e-05
ENSMUSG00000078307.3	AI593442	1.34627	1.38303	1.38563e-06	2.80017e-05
ENSMUSG00000110031.1	Gm18205	1.96232	-0.13101	1.39671e-06	2.81811e-05
ENSMUSG00000105970.1	Gm43360	1.4736	0.313613	1.40292e-06	2.82951e-05
ENSMUSG00000103500.1	Gm38373	1.77554	-0.419131	1.4127e-06	2.84811e-05
ENSMUSG00000003464.13	Pex19	1.42473	0.687096	1.42615e-06	2.87295e-05
ENSMUSG00000099403.1	Gm29599	1.54498	-0.165777	1.42875e-06	2.87706e-05
ENSMUSG00000095758.1	Vmn1r128	1.80961	-0.445561	1.42953e-06	2.87749e-05
ENSMUSG00000081062.1	Gm13640	2.27727	0.117008	1.43096e-06	2.87923e-05
ENSMUSG00000005802.12	Slc30a4	1.34045	-0.125045	1.46244e-06	2.93563e-05
ENSMUSG00000100883.1	Gm28773	1.75801	-0.444598	1.47116e-06	2.9501e-05
ENSMUSG00000108562.1	Gm44519	2.2854	0.336603	1.48319e-06	2.97261e-05
ENSMUSG00000112519.1	Gm47671	1.57571	-0.379285	1.49566e-06	2.99643e-05
ENSMUSG00000027642.15	Rpn2	1.47255	0.513248	1.50475e-06	3.01345e-05
ENSMUSG00000117077.1	Gm18735	1.77666	-0.0636855	1.5075e-06	3.01778e-05
ENSMUSG00000084000.1	Gm14653	1.55976	-0.319215	1.51283e-06	3.02727e-05
ENSMUSG00000110363.1	Gm45576	1.61927	-0.0924918	1.51603e-06	3.03129e-05
ENSMUSG00000050505.7	Pcdh20	1.42101	0.680067	1.51894e-06	3.03591e-05
ENSMUSG00000055540.15	Epha6	1.27377	0.511902	1.52764e-06	3.05095e-05
ENSMUSG00000110532.1	Gm35857	2.1031	0.79361	1.55036e-06	3.09509e-05
ENSMUSG00000106892.1	Gm42791	1.33425	-0.478913	1.57293e-06	3.13769e-05
ENSMUSG00000095847.1	Gm5451	1.81545	0.352471	1.57379e-06	3.13817e-05
ENSMUSG00000100696.1	Gm8419	1.68282	-0.343347	1.57775e-06	3.14483e-05
ENSMUSG00000037049.9	Smpd1	1.58072	0.34295	1.58665e-06	3.16135e-05
ENSMUSG00000052012.6	Olfr796	1.59907	1.10327	1.60182e-06	3.19033e-05
ENSMUSG00000116825.1	Rps2-ps7	1.83163	0.047234	1.60964e-06	3.2034e-05
ENSMUSG00000094556.2	Gm20821	1.35811	-0.461104	1.61101e-06	3.20488e-05
ENSMUSG00000018395.19	Kif3a	1.14336	2.86647	1.61743e-06	3.21423e-05
ENSMUSG00000021178.9	Psmc1	1.60776	1.66261	1.6176e-06	3.21423e-05
ENSMUSG00000113821.1	Gm48234	1.71318	-0.416874	1.6259e-06	3.22726e-05
ENSMUSG00000029346.12	Srrd	2.26231	1.94949	1.64817e-06	3.26989e-05
ENSMUSG00000042680.8	Garem1	1.13112	1.184	1.65365e-06	3.27585e-05
ENSMUSG00000027593.15	Raly	1.57616	0.37894	1.65496e-06	3.27585e-05
ENSMUSG00000065684.1	Gm23733	1.61167	-0.302294	1.65424e-06	3.27585e-05
ENSMUSG00000050705.15	2310061I04Rik	1.41955	0.775889	1.65709e-06	3.27867e-05
ENSMUSG00000039501.14	Znfx1	1.22581	1.28277	1.65913e-06	3.28142e-05
ENSMUSG00000035673.10	Sbno2	1.24581	2.17668	1.66153e-06	3.28491e-05
ENSMUSG00000115551.1	Gm49115	1.94464	-0.381131	1.66535e-06	3.29118e-05
ENSMUSG00000040712.16	Camta2	1.32592	1.3126	1.6666e-06	3.29237e-05
ENSMUSG00000068647.2	Olfr1278	1.36588	0.660067	1.66982e-06	3.29746e-05
ENSMUSG00000024121.13	Atp6v0c	1.33626	0.153992	1.69013e-06	3.33627e-05
ENSMUSG00000022064.10	Pibf1	1.09676	1.18555	1.69634e-06	3.34594e-05
ENSMUSG00000034926.3	Dhcr24	1.31505	1.36668	1.69612e-06	3.34594e-05
ENSMUSG00000040640.11	Erc2	1.67465	3.02107	1.7001e-06	3.35207e-05
ENSMUSG00000107254.1	Gm43769	1.57034	0.743071	1.70979e-06	3.36987e-05
ENSMUSG00000037070.10	Rbmxl1	1.54106	-0.128815	1.72867e-06	3.40445e-05
ENSMUSG00000020691.13	Mettl2	1.49909	1.42058	1.7356e-06	3.41678e-05
ENSMUSG00000025439.5	Clns1a	1.31506	0.28094	1.73917e-06	3.42249e-05
ENSMUSG00000113221.1	Gm18880	1.61451	-0.378339	1.74731e-06	3.43585e-05
ENSMUSG00000018914.5	Il3	1.60685	-0.436822	1.74906e-06	3.43799e-05
ENSMUSG00000025323.10	Sp4	1.42362	1.10635	1.75552e-06	3.44935e-05
ENSMUSG00000105111.1	Gm43310	2.1111	0.535592	1.76732e-06	3.47119e-05
ENSMUSG00000085246.1	Gm15893	1.644	0.454451	1.7997e-06	3.53343e-05
ENSMUSG00000106918.3	Mrpl33	1.32868	1.3506	1.80302e-06	3.53858e-05
ENSMUSG00000041028.16	Ghitm	1.56144	1.20465	1.80769e-06	3.54503e-05
ENSMUSG00000052909.8	Gm9894	1.33767	-0.0319653	1.81275e-06	3.55359e-05
ENSMUSG00000112675.1	Gm48892	1.80149	-0.134433	1.82274e-06	3.5718e-05
ENSMUSG00000022286.16	Grhl2	1.16935	1.61175	1.82375e-06	3.57227e-05
ENSMUSG00000019312.10	Grb7	1.28862	0.147427	1.82438e-06	3.57227e-05
ENSMUSG00000021413.9	Prpf4b	1.37814	2.00773	1.83101e-06	3.58388e-05
ENSMUSG00000108301.1	Gm45127	1.90829	-0.175276	1.834e-06	3.58702e-05
ENSMUSG00000113948.1	Rpl17-ps3	1.66347	-0.0165266	1.84887e-06	3.61467e-05
ENSMUSG00000110915.1	Gm36198	1.64971	-0.276908	1.8634e-06	3.64169e-05
ENSMUSG00000105224.1	Gm3364	1.62033	0.627308	1.86838e-06	3.64978e-05
ENSMUSG00000082990.1	Gm14052	1.99366	0.532141	1.86897e-06	3.64978e-05
ENSMUSG00000083692.1	Gm9575	1.43416	0.401396	1.87463e-06	3.65944e-05
ENSMUSG00000106835.3	Gm43812	1.98123	-0.0586532	1.87667e-06	3.65963e-05
ENSMUSG00000030795.18	Fus	1.31168	2.32415	1.90646e-06	3.7074e-05
ENSMUSG00000028243.5	Ubxn2b	1.40853	0.933548	1.90603e-06	3.7074e-05
ENSMUSG00000028520.12	4921539E11Rik	1.53978	0.340183	1.90594e-06	3.7074e-05
ENSMUSG00000115268.1	Gm18524	1.88028	0.48365	1.90442e-06	3.7074e-05
ENSMUSG00000101641.1	Gm29560	1.82146	0.527397	1.9119e-06	3.71655e-05
ENSMUSG00000097035.2	Gm26692	1.74157	-0.0721332	1.92008e-06	3.73104e-05
ENSMUSG00000041926.15	Rnpep	1.17369	1.1567	1.92913e-06	3.74577e-05
ENSMUSG00000087720.1	Gm26279	1.52598	0.187542	1.93702e-06	3.75966e-05
ENSMUSG00000022982.10	Sod1	1.53573	2.49131	1.95473e-06	3.7896e-05
ENSMUSG00000115736.1	Gm8586	1.62423	-0.0709636	1.95542e-06	3.7896e-05
ENSMUSG00000031485.15	Plpbp	1.27993	1.76686	1.96682e-06	3.81025e-05
ENSMUSG00000050323.14	Ndufaf6	1.33756	-0.241796	1.98136e-06	3.83407e-05
ENSMUSG00000097275.1	Gm26648	1.28588	1.19955	2.00972e-06	3.88599e-05
ENSMUSG00000042197.13	Zfp451	1.31495	1.89827	2.01364e-06	3.8921e-05
ENSMUSG00000020648.3	Dus4l	1.58568	0.500352	2.04117e-06	3.94084e-05
ENSMUSG00000030178.15	Klra13-ps	1.62347	-0.256295	2.05619e-06	3.96832e-05
ENSMUSG00000096555.3	Olfr944	1.92019	-0.189918	2.05708e-06	3.96854e-05
ENSMUSG00000109179.2	Gm35339	1.23205	0.893312	2.05791e-06	3.96865e-05
ENSMUSG00000073491.11	Ifi213	1.38105	0.294434	2.06886e-06	3.98675e-05
ENSMUSG00000114834.1	Gm48705	1.71365	-0.197137	2.0681e-06	3.98675e-05
ENSMUSG00000039089.15	L3mbtl3	1.38279	2.37505	2.09348e-06	4.02811e-05
ENSMUSG00000046678.6	Olfr981	1.32033	0.428921	2.09663e-06	4.03265e-05
ENSMUSG00000037953.7	A4gnt	1.34274	0.56913	2.09936e-06	4.03638e-05
ENSMUSG00000106246.1	Gm18867	1.84814	0.375437	2.10443e-06	4.0446e-05
ENSMUSG00000038880.13	Mrps34	1.7382	0.414253	2.11491e-06	4.06017e-05
ENSMUSG00000052565.7	H1f3	1.1416	1.14118	2.11958e-06	4.0676e-05
ENSMUSG00000095799.1	Eif1ad10	1.74324	-0.409912	2.13379e-06	4.09179e-05
ENSMUSG00000083705.2	Gm8624	1.86938	0.636879	2.14284e-06	4.10607e-05
ENSMUSG00000105744.1	Gm43141	1.78285	-0.266823	2.17457e-06	4.15975e-05
ENSMUSG00000048236.8	Ovch2	1.55397	0.1228	2.18528e-06	4.17797e-05
ENSMUSG00000019970.15	Sgk1	1.41945	0.89812	2.19635e-06	4.196e-05
ENSMUSG00000022847.15	Thpo	1.43133	0.102161	2.21878e-06	4.23727e-05
ENSMUSG00000117287.1	Gm36200	1.7263	0.378216	2.22273e-06	4.24322e-05
ENSMUSG00000024070.15	Prkd3	1.15249	1.73064	2.23297e-06	4.25958e-05
ENSMUSG00000109999.1	Gm35368	1.63034	0.235167	2.24057e-06	4.27248e-05
ENSMUSG00000044071.8	Tafa2	1.74004	2.06409	2.27822e-06	4.33618e-05
ENSMUSG00000108602.1	Klk1b10-ps	1.6431	0.271904	2.31392e-06	4.40249e-05
ENSMUSG00000095071.2	AF067061	1.6895	-0.435505	2.33506e-06	4.4394e-05
ENSMUSG00000084838.3	Gm10241	1.54005	-0.47078	2.34114e-06	4.44929e-05
ENSMUSG00000066406.15	Akap13	1.19333	3.01696	2.35661e-06	4.47703e-05
ENSMUSG00000102597.1	Gm38382	1.41309	-0.182812	2.35829e-06	4.47856e-05
ENSMUSG00000104486.1	Gm38066	1.43781	-0.23564	2.37375e-06	4.50457e-05
ENSMUSG00000053641.9	Dennd4a	1.13712	1.97668	2.40509e-06	4.56064e-05
ENSMUSG00000086722.1	Gm15499	1.80728	-0.36519	2.40444e-06	4.56064e-05
ENSMUSG00000016346.17	Kcnq2	1.18619	2.06096	2.42397e-06	4.59304e-05
ENSMUSG00000089809.9	Rasgef1b	1.12611	2.16391	2.42606e-06	4.59383e-05
ENSMUSG00000051855.15	Mest	1.26904	1.78	2.42619e-06	4.59383e-05
ENSMUSG00000036745.15	Ttll7	1.32781	1.56924	2.42809e-06	4.59452e-05
ENSMUSG00000034403.16	Pja1	1.78713	1.72421	2.43336e-06	4.60228e-05
ENSMUSG00000083462.1	Gm12501	1.70667	-0.292398	2.43558e-06	4.60478e-05
ENSMUSG00000101846.1	Gm19927	1.9339	-0.0317446	2.43996e-06	4.61019e-05
ENSMUSG00000112671.1	Gm18242	1.38315	-0.234157	2.44131e-06	4.61049e-05
ENSMUSG00000109537.1	Olfr200-ps1	1.2928	-0.474609	2.44799e-06	4.6214e-05
ENSMUSG00000019577.6	Pdk4	1.30685	0.372618	2.45267e-06	4.62436e-05
ENSMUSG00000097807.1	Gm26553	1.45149	-0.135886	2.45318e-06	4.62436e-05
ENSMUSG00000001020.8	S100a4	1.87164	0.0542827	2.45231e-06	4.62436e-05
ENSMUSG00000083518.1	Gm9429	1.62938	-0.422121	2.4777e-06	4.6654e-05
ENSMUSG00000102187.1	Gm7897	1.49109	-0.328642	2.48025e-06	4.66848e-05
ENSMUSG00000023088.17	Abcc1	1.11513	1.78313	2.4856e-06	4.67683e-05
ENSMUSG00000103791.1	Gm38095	1.81712	0.286214	2.48967e-06	4.68103e-05
ENSMUSG00000042507.15	Mideas	1.23893	1.62167	2.49563e-06	4.69052e-05
ENSMUSG00000115752.1	1700010G06Rik	1.56957	-0.328501	2.51519e-06	4.7238e-05
ENSMUSG00000071204.10	Gm10319	1.6367	0.304072	2.51458e-06	4.7238e-05
ENSMUSG00000103273.1	Gm37913	1.79535	1.13419	2.52872e-06	4.74572e-05
ENSMUSG00000100814.1	Gm28669	1.86353	-0.34073	2.5327e-06	4.75145e-05
ENSMUSG00000059647.5	Cbx3-ps7	1.60683	-0.343817	2.56626e-06	4.8038e-05
ENSMUSG00000102546.1	Gm9722	1.66395	0.0250764	2.56854e-06	4.80632e-05
ENSMUSG00000104396.1	Gm37959	1.56531	0.841068	2.57304e-06	4.81296e-05
ENSMUSG00000104181.1	Gm8850	1.98064	-0.0987666	2.61134e-06	4.87389e-05
ENSMUSG00000063087.15	Gm10125	1.16532	0.990352	2.62484e-06	4.89373e-05
ENSMUSG00000103243.1	Lce1d	1.56951	-0.423545	2.62735e-06	4.89464e-05
ENSMUSG00000084212.1	Gm12225	1.60323	-0.369209	2.62821e-06	4.89464e-05
ENSMUSG00000114544.1	Gm49146	1.42094	-0.171157	2.63561e-06	4.90524e-05
ENSMUSG00000112376.1	Gm40649	1.5251	0.227639	2.63582e-06	4.90524e-05
ENSMUSG00000028382.15	Ptbp3	1.5164	2.4148	2.64327e-06	4.91551e-05
ENSMUSG00000030159.15	Clec1b	1.5384	0.628879	2.645e-06	4.91694e-05
ENSMUSG00000106330.1	Gm43369	1.49595	-0.334333	2.65694e-06	4.93376e-05
ENSMUSG00000074968.11	Ano3	1.2904	1.67949	2.68171e-06	4.97612e-05
ENSMUSG00000030850.17	Ate1	1.08246	0.921846	2.69997e-06	5.00819e-05
ENSMUSG00000085633.1	Bloc1s6os	2.06157	0.738473	2.71037e-06	5.02565e-05
ENSMUSG00000020658.10	Efr3b	1.15065	1.45452	2.71299e-06	5.02869e-05
ENSMUSG00000017670.16	Elmo2	1.39426	1.22565	2.7282e-06	5.05322e-05
ENSMUSG00000104381.1	Gm37032	1.53328	-0.342262	2.7274e-06	5.05322e-05
ENSMUSG00000108344.1	Gm8952	1.51107	-0.0444578	2.73101e-06	5.05657e-05
ENSMUSG00000112116.1	Gm46234	2.06515	0.446891	2.74604e-06	5.08139e-05
ENSMUSG00000084160.1	Gm13345	2.06509	-0.101577	2.75182e-06	5.08956e-05
ENSMUSG00000109313.1	Gm44693	2.19143	0.925843	2.77954e-06	5.13898e-05
ENSMUSG00000050855.16	Zfp940	1.49898	1.05117	2.78273e-06	5.14301e-05
ENSMUSG00000094525.2	Trbv12-2	2.00345	-0.38083	2.81095e-06	5.1914e-05
ENSMUSG00000051159.16	Cited1	1.40418	0.134657	2.82795e-06	5.21903e-05
ENSMUSG00000112431.1	Gm10741	1.35575	-0.231068	2.84408e-06	5.2469e-05
ENSMUSG00000081909.1	Gm11341	1.79595	-0.323296	2.85304e-06	5.25964e-05
ENSMUSG00000091962.3	Vmn2r78	1.65986	0.679045	2.88611e-06	5.31676e-05
ENSMUSG00000020650.15	Bcap29	1.35085	1.65253	2.92213e-06	5.37922e-05
ENSMUSG00000094124.5	Ighv1-74	1.98773	-0.169793	2.93164e-06	5.39284e-05
ENSMUSG00000024712.9	Rfk	1.59274	0.627733	2.94903e-06	5.42287e-05
ENSMUSG00000076646.3	Ighv2-6-8	2.01969	-0.128685	2.95315e-06	5.42849e-05
ENSMUSG00000028821.8	Syf2	1.30537	0.787129	2.9646e-06	5.44759e-05
ENSMUSG00000062070.12	Pgk1	1.77689	0.792139	3.01219e-06	5.53305e-05
ENSMUSG00000100865.2	Gm9320	1.56643	0.331805	3.01541e-06	5.53696e-05
ENSMUSG00000098905.2	Zfp953	1.50086	0.127592	3.01701e-06	5.53792e-05
ENSMUSG00000071890.4	Mroh9	1.27228	0.184221	3.02836e-06	5.55275e-05
ENSMUSG00000114858.1	Gm5790	1.52657	0.0494807	3.03322e-06	5.55967e-05
ENSMUSG00000092336.1	Vmn1r-ps40	1.52242	-0.455403	3.11149e-06	5.69087e-05
ENSMUSG00000098659.7	1110015O18Rik	1.5084	0.0374804	3.11442e-06	5.69419e-05
ENSMUSG00000077039.1	NA	1.41168	-0.491186	3.13687e-06	5.72908e-05
ENSMUSG00000082454.3	Gm12183	1.66827	-0.269291	3.17258e-06	5.79016e-05
ENSMUSG00000020805.14	Slc13a5	1.22928	0.703969	3.20079e-06	5.83588e-05
ENSMUSG00000097006.7	9530082P21Rik	1.41523	0.89306	3.20251e-06	5.83643e-05
ENSMUSG00000024137.9	E4f1	1.13493	0.694264	3.2137e-06	5.85474e-05
ENSMUSG00000021916.16	Glt8d1	1.47352	1.12441	3.22556e-06	5.87216e-05
ENSMUSG00000112173.1	Gm48145	1.92036	-0.15551	3.24331e-06	5.90235e-05
ENSMUSG00000110546.1	Gm45734	1.41128	-0.326366	3.25107e-06	5.91227e-05
ENSMUSG00000073676.4	Hspe1	1.68637	0.724376	3.25084e-06	5.91227e-05
ENSMUSG00000080701.1	Gm12340	1.7039	-0.393293	3.25244e-06	5.91265e-05
ENSMUSG00000100441.1	Gm7266	1.40065	-0.392085	3.2855e-06	5.9685e-05
ENSMUSG00000114041.2	Gm9269	1.5723	-0.467392	3.29203e-06	5.97823e-05
ENSMUSG00000034762.9	Glis1	1.35182	0.737352	3.29377e-06	5.97927e-05
ENSMUSG00000079180.4	Mptx2	1.72096	-0.389512	3.29775e-06	5.98437e-05
ENSMUSG00000117250.1	Gm49871	1.64117	-0.0659963	3.30468e-06	5.99481e-05
ENSMUSG00000061702.10	Tmem91	1.57716	1.46353	3.32286e-06	6.02565e-05
ENSMUSG00000038498.3	Catsper1	1.42095	0.312326	3.33172e-06	6.03958e-05
ENSMUSG00000034259.8	Exosc4	1.37437	0.31035	3.35279e-06	6.06915e-05
ENSMUSG00000081978.1	Gm14895	1.454	-0.32441	3.37674e-06	6.10817e-05
ENSMUSG00000099914.1	Gm28837	1.5489	-0.454989	3.4005e-06	6.14897e-05
ENSMUSG00000102988.1	Trbv22	1.568	-0.444819	3.4357e-06	6.20822e-05
ENSMUSG00000081908.2	Olfr1147-ps1	1.56793	-0.421997	3.45012e-06	6.23207e-05
ENSMUSG00000042742.7	Bmt2	1.37754	1.10877	3.45195e-06	6.23317e-05
ENSMUSG00000115745.1	Gm46448	1.97573	0.451905	3.48424e-06	6.2848e-05
ENSMUSG00000112424.1	Gm6494	1.57275	0.180469	3.48893e-06	6.29105e-05
ENSMUSG00000103552.1	Gm38217	1.62888	-0.321586	3.52233e-06	6.34903e-05
ENSMUSG00000026504.17	Sdccag8	1.04093	0.371211	3.52651e-06	6.35432e-05
ENSMUSG00000085029.1	Gm13569	1.20688	-0.451009	3.54307e-06	6.38191e-05
ENSMUSG00000055799.13	Tcf7l1	1.17829	1.43782	3.55026e-06	6.3926e-05
ENSMUSG00000086287.1	Gm15972	1.44037	-0.453254	3.55863e-06	6.4054e-05
ENSMUSG00000104252.5	Pcdha4	1.94663	0.260982	3.56196e-06	6.40914e-05
ENSMUSG00000117074.1	Gm49925	1.55848	-0.198425	3.56348e-06	6.40962e-05
ENSMUSG00000076668.4	Ighv7-4	1.51846	-0.458641	3.58124e-06	6.43703e-05
ENSMUSG00000081594.1	Gm15467	1.55078	-0.327596	3.60709e-06	6.48121e-05
ENSMUSG00000096758.1	NA	2.14801	-0.088524	3.6313e-06	6.5224e-05
ENSMUSG00000062121.3	Olfr149	1.44392	-0.145864	3.63718e-06	6.53067e-05
ENSMUSG00000109472.1	Gm18943	1.77459	0.429835	3.66083e-06	6.57084e-05
ENSMUSG00000038215.15	Cep44	1.16867	1.0531	3.66279e-06	6.57204e-05
ENSMUSG00000078042.1	NA	1.60467	-0.461617	3.6656e-06	6.57476e-05
ENSMUSG00000089061.1	NA	1.63849	-0.437964	3.67997e-06	6.59591e-05
ENSMUSG00000038084.16	Opa1	1.11066	2.37612	3.70677e-06	6.64161e-05
ENSMUSG00000081325.1	Gm12599	1.60959	0.0671617	3.71059e-06	6.64613e-05
ENSMUSG00000032065.6	Tex12	1.38084	-0.280339	3.71626e-06	6.65395e-05
ENSMUSG00000025776.13	Crispld1	1.41448	1.31377	3.73386e-06	6.68311e-05
ENSMUSG00000028517.8	Plpp3	1.49201	1.58206	3.74905e-06	6.70795e-05
ENSMUSG00000094191.1	Rpl31-ps14	1.57869	0.079836	3.7932e-06	6.77982e-05
ENSMUSG00000085235.1	Gm12576	1.45281	0.5251	3.79739e-06	6.78493e-05
ENSMUSG00000105760.1	Gm43211	1.44898	-0.157633	3.81143e-06	6.80525e-05
ENSMUSG00000062868.4	Olfr830	1.67683	0.556881	3.81563e-06	6.80832e-05
ENSMUSG00000110792.1	Olfr931-ps1	1.78774	-0.3325	3.81581e-06	6.80832e-05
ENSMUSG00000107748.4	Olfr766-ps1	1.51559	-0.263571	3.88062e-06	6.91472e-05
ENSMUSG00000101457.1	Gm18701	1.58175	0.0713812	3.88087e-06	6.91472e-05
ENSMUSG00000083340.1	Gm13156	1.51784	-0.1545	3.90135e-06	6.9488e-05
ENSMUSG00000082247.1	Gm16074	1.85607	-0.305988	3.9063e-06	6.95517e-05
ENSMUSG00000097872.1	NA	1.30771	0.949387	3.9139e-06	6.96628e-05
ENSMUSG00000028226.15	Mmp16	1.48884	1.80522	3.92121e-06	6.97685e-05
ENSMUSG00000031841.19	Cdh13	1.20387	2.625	3.95904e-06	7.04171e-05
ENSMUSG00000111664.1	Gm48865	1.60544	0.26956	3.98108e-06	7.07598e-05
ENSMUSG00000023064.4	Sncg	1.24267	-0.295788	3.9942e-06	7.09683e-05
ENSMUSG00000029017.13	Pmpcb	1.31446	0.447414	3.99896e-06	7.10282e-05
ENSMUSG00000110506.1	Gm8637	1.72164	0.151858	4.02359e-06	7.14408e-05
ENSMUSG00000057388.9	Mrpl18	1.59569	0.566512	4.04829e-06	7.18529e-05
ENSMUSG00000076398.1	Mir676	1.91416	-0.422388	4.05963e-06	7.20055e-05
ENSMUSG00000096806.2	Olfr312	1.51101	0.172914	4.08855e-06	7.24135e-05
ENSMUSG00000108005.1	Gm44435	1.51559	0.316904	4.08892e-06	7.24135e-05
ENSMUSG00000057037.8	Cfhr1	1.918	0.38902	4.10212e-06	7.26078e-05
ENSMUSG00000087264.1	Gad1os	1.41089	-0.369191	4.12864e-06	7.29744e-05
ENSMUSG00000105121.1	Gm43406	2.01105	-0.0497824	4.12998e-06	7.29744e-05
ENSMUSG00000104394.2	Gm37254	1.16507	1.45736	4.1393e-06	7.31138e-05
ENSMUSG00000060205.3	Olfr57	1.74601	1.58954	4.14124e-06	7.31228e-05
ENSMUSG00000028882.13	Ppp1r8	1.22171	0.582476	4.15502e-06	7.32899e-05
ENSMUSG00000085434.1	Gm11725	1.38035	1.16683	4.1569e-06	7.32979e-05
ENSMUSG00000022964.14	Tmem50b	1.28752	0.373257	4.16692e-06	7.34492e-05
ENSMUSG00000025586.17	Cpeb1	1.70458	1.73903	4.2047e-06	7.40639e-05
ENSMUSG00000045613.9	Chrm2	1.43367	1.01286	4.20902e-06	7.41144e-05
ENSMUSG00000002580.7	Mien1	2.01879	1.04877	4.21324e-06	7.41632e-05
ENSMUSG00000101122.1	Gm17971	1.94865	0.424117	4.22628e-06	7.43671e-05
ENSMUSG00000084824.1	Gm16344	1.88892	-0.0402421	4.22924e-06	7.43934e-05
ENSMUSG00000047025.5	Ccer1	1.49151	-0.0697442	4.26882e-06	7.5038e-05
ENSMUSG00000027227.7	Sord	1.50093	0.581136	4.27423e-06	7.51072e-05
ENSMUSG00000103313.1	Gm38357	1.56135	0.425912	4.28403e-06	7.52535e-05
ENSMUSG00000115712.1	Gm49255	1.90196	-0.146408	4.31786e-06	7.58217e-05
ENSMUSG00000085630.1	Gm11795	2.67248	1.30682	4.33111e-06	7.60282e-05
ENSMUSG00000083425.1	Gm13992	1.80083	-0.377213	4.355e-06	7.63951e-05
ENSMUSG00000004267.16	Eno2	1.19351	1.79961	4.4534e-06	7.80676e-05
ENSMUSG00000103558.1	Gm38220	1.47153	0.504223	4.45832e-06	7.8127e-05
ENSMUSG00000111131.1	9930024M15Rik	1.59376	0.505815	4.46246e-06	7.81726e-05
ENSMUSG00000024091.9	Vapa	1.45876	1.32696	4.47019e-06	7.82812e-05
ENSMUSG00000105893.1	Wdr46-ps	1.32742	-0.262597	4.48013e-06	7.84285e-05
ENSMUSG00000089694.2	Nat8f7	1.80023	-0.27483	4.48792e-06	7.8511e-05
ENSMUSG00000098305.1	NA	1.4384	-0.482635	4.49233e-06	7.85612e-05
ENSMUSG00000079477.9	Rab7	1.37215	0.761494	4.53298e-06	7.92178e-05
ENSMUSG00000064317.5	Gm10146	1.49887	-0.445156	4.53961e-06	7.93064e-05
ENSMUSG00000006289.14	Osgep	1.50526	1.01871	4.54442e-06	7.93362e-05
ENSMUSG00000025856.15	Pdgfa	1.12462	1.25966	4.56208e-06	7.96172e-05
ENSMUSG00000117490.1	Gm35031	1.73563	0.425014	4.57264e-06	7.97743e-05
ENSMUSG00000046404.5	Yod1	1.14223	1.11526	4.6061e-06	8.03306e-05
[truncated: 2,814 more rows]

## Sheet: 5B. GO Overexpressed
GO biological process complete	upload_1 (FDR)
cytoplasmic translation (GO:0002181)	0.00462
organonitrogen compound metabolic process (GO:1901564)	0.00712
regulation of intrinsic apoptotic signaling pathway (GO:2001242)	0.0134
peptide metabolic process (GO:0006518)	0.0135
nitrogen compound metabolic process (GO:0006807)	0.0136
primary metabolic process (GO:0044238)	0.0143
ATP biosynthetic process (GO:0006754)	0.0145
oxidative phosphorylation (GO:0006119)	0.0146
regulation of oxidative stress-induced intrinsic apoptotic signaling pathway (GO:1902175)	0.0155
translation (GO:0006412)	0.0161
proton motive force-driven ATP synthesis (GO:0015986)	0.0168
peptide biosynthetic process (GO:0043043)	0.017
organonitrogen compound biosynthetic process (GO:1901566)	0.0174
purine ribonucleoside triphosphate biosynthetic process (GO:0009206)	0.0179
purine nucleoside triphosphate biosynthetic process (GO:0009145)	0.0183
cellular respiration (GO:0045333)	0.0185
proton motive force-driven mitochondrial ATP synthesis (GO:0042776)	0.0187
establishment of localization in cell (GO:0051649)	0.0216
aerobic respiration (GO:0009060)	0.0235
ribonucleoside triphosphate biosynthetic process (GO:0009201)	0.0275
purine nucleoside triphosphate metabolic process (GO:0009144)	0.0298
purine ribonucleoside triphosphate metabolic process (GO:0009205)	0.0329
nucleoside triphosphate metabolic process (GO:0009141)	0.0342
regulation of response to endoplasmic reticulum stress (GO:1905897)	0.0342
nucleoside triphosphate biosynthetic process (GO:0009142)	0.046

## Sheet: 5C. Underexpression
Enzemble	external_gene_name	logFC	logCPM	PValue	FDR
ENSMUSG00000078578.9	Ube2d3	-5.85437	6.92024	1.9649e-26	3.03945e-23
ENSMUSG00000001986.16	Gria3	-5.97425	6.6523	4.78967e-23	3.64923e-20
ENSMUSG00000025557.10	Slc15a1	-6.68881	6.74263	2.7884e-22	1.77925e-19
ENSMUSG00000022387.17	Brd1	-6.16158	6.10265	2.87405e-22	1.81125e-19
ENSMUSG00000074582.10	Arfgef2	-4.6039	5.00949	3.98669e-22	2.39422e-19
ENSMUSG00000037736.18	Limch1	-5.35038	5.70074	9.93344e-22	5.39439e-19
ENSMUSG00000026103.14	Gls	-5.03875	6.13174	1.14069e-21	6.12936e-19
ENSMUSG00000021282.17	Eif5	-6.51583	5.95366	1.93835e-21	9.60652e-19
ENSMUSG00000026490.18	Cdc42bpa	-4.69746	5.90464	2.28032e-21	1.1086e-18
ENSMUSG00000034154.15	Ino80	-5.67858	4.88778	3.82678e-21	1.72872e-18
ENSMUSG00000066571.13	Garre1	-5.94776	5.43924	6.49945e-21	2.86015e-18
ENSMUSG00000056342.16	Usp34	-4.34214	5.23793	1.85994e-20	7.71905e-18
ENSMUSG00000025762.15	Larp1b	-5.35231	5.26983	2.69603e-20	1.06685e-17
ENSMUSG00000008763.16	Man1a2	-5.25232	5.04428	4.62652e-20	1.73654e-17
ENSMUSG00000014164.15	Klhl3	-5.45439	5.27385	7.90667e-20	2.82246e-17
ENSMUSG00000024290.9	Rock1	-4.02295	5.17167	8.1482e-20	2.86856e-17
ENSMUSG00000020950.10	Foxg1	-7.69681	6.5374	9.75607e-20	3.38788e-17
ENSMUSG00000025241.16	Fyco1	-6.04211	5.99326	1.06669e-19	3.60987e-17
ENSMUSG00000024277.14	Mapre2	-5.30911	5.25582	1.25517e-19	4.18776e-17
ENSMUSG00000028358.15	Zfp618	-4.34312	4.56246	1.7097e-19	5.59455e-17
ENSMUSG00000021244.15	Ylpm1	-4.35368	3.82841	2.04748e-19	6.57343e-17
ENSMUSG00000027698.14	Nceh1	-6.2649	5.79818	3.39737e-19	1.04473e-16
ENSMUSG00000055065.7	Ddx17	-5.13698	5.37844	5.25532e-19	1.53296e-16
ENSMUSG00000036478.8	Btg1	-4.32759	4.20849	7.67767e-19	2.13001e-16
ENSMUSG00000029657.15	Hsph1	-4.76939	4.45292	9.59929e-19	2.6204e-16
ENSMUSG00000055723.6	Rras2	-7.79343	6.55553	1.10775e-18	2.97617e-16
ENSMUSG00000028180.18	Zranb2	-4.88523	4.72961	1.51132e-18	3.97672e-16
ENSMUSG00000051177.16	Plcb1	-4.38235	5.45728	2.13488e-18	5.53195e-16
ENSMUSG00000105791.1	Gm43341	-8.73501	7.30019	2.55687e-18	6.49357e-16
ENSMUSG00000029016.13	Clcn6	-4.78356	3.66007	3.70616e-18	9.13953e-16
ENSMUSG00000031360.14	Ctps2	-5.59009	4.26837	4.16287e-18	1.00237e-15
ENSMUSG00000022208.12	Jph4	-4.40134	5.08846	5.3806e-18	1.27159e-15
ENSMUSG00000027566.15	Psma7	-4.1894	2.80664	7.22529e-18	1.65394e-15
ENSMUSG00000051606.5	2010001K21Rik	-8.08161	6.9184	1.17389e-17	2.56994e-15
ENSMUSG00000026696.15	Vamp4	-5.79689	5.60437	1.27701e-17	2.77394e-15
ENSMUSG00000019947.10	Arid5b	-3.92772	4.46335	1.85312e-17	3.90893e-15
ENSMUSG00000029840.8	Mtpn	-7.31444	6.87621	2.12136e-17	4.38417e-15
ENSMUSG00000021738.5	Atxn7	-4.80437	4.6378	2.14311e-17	4.41126e-15
ENSMUSG00000069631.14	Strada	-5.13347	4.87072	2.39194e-17	4.88406e-15
ENSMUSG00000036898.16	Zfp157	-4.85228	4.80069	2.88081e-17	5.76693e-15
ENSMUSG00000031988.10	Vps26b	-4.82461	3.7669	3.98873e-17	7.71261e-15
ENSMUSG00000033569.17	Adgrb3	-3.50326	4.80711	4.09781e-17	7.89363e-15
ENSMUSG00000049313.8	Sorl1	-3.32699	4.14903	4.42192e-17	8.48593e-15
ENSMUSG00000020513.15	Tubd1	-7.10665	4.97461	5.73984e-17	1.08519e-14
ENSMUSG00000027799.12	Nbea	-3.65599	6.04283	5.7024e-17	1.08519e-14
ENSMUSG00000096054.3	Syne1	-3.33219	5.95665	5.95326e-17	1.11317e-14
ENSMUSG00000043909.16	Trp53bp1	-3.79681	4.3966	8.64148e-17	1.56983e-14
ENSMUSG00000029093.14	Sorcs2	-4.13222	3.45517	1.29099e-16	2.24919e-14
ENSMUSG00000026727.10	Rsu1	-4.1766	4.35664	1.42115e-16	2.46753e-14
ENSMUSG00000028413.13	B4galt1	-4.52482	3.22332	1.51596e-16	2.60556e-14
ENSMUSG00000004748.5	Mtfp1	-6.59027	3.83626	1.5627e-16	2.67689e-14
ENSMUSG00000019775.17	Rgs17	-4.36906	4.43407	1.93631e-16	3.29476e-14
ENSMUSG00000028271.9	Gtf2b	-4.51596	3.54663	2.35491e-16	3.95432e-14
ENSMUSG00000040536.15	Necab1	-4.17629	3.23679	2.49529e-16	4.17629e-14
ENSMUSG00000039195.4	Bbln	-4.80968	2.50688	2.81776e-16	4.67007e-14
ENSMUSG00000027809.14	Etfdh	-5.20318	5.34956	3.47726e-16	5.68921e-14
ENSMUSG00000040097.16	Flywch1	-4.75398	3.91292	3.47609e-16	5.68921e-14
ENSMUSG00000004356.8	Utp20	-3.46924	3.7415	3.52845e-16	5.75454e-14
ENSMUSG00000021302.10	Ggps1	-4.57976	3.5751	4.48533e-16	7.22279e-14
ENSMUSG00000064115.13	Cadm2	-4.4329	5.99815	5.95856e-16	9.44616e-14
ENSMUSG00000008575.17	Nfib	-3.03389	4.95114	6.03158e-16	9.53232e-14
ENSMUSG00000027933.11	Ints3	-4.32549	4.04064	6.07154e-16	9.56587e-14
ENSMUSG00000001323.17	Srr	-4.2341	3.63172	7.3422e-16	1.1392e-13
ENSMUSG00000034462.9	Pkd2	-3.64121	3.37321	7.86188e-16	1.21614e-13
ENSMUSG00000030774.13	Pak1	-4.32973	4.23256	1.03067e-15	1.55659e-13
ENSMUSG00000027777.15	Schip1	-6.71532	5.66234	1.03803e-15	1.56307e-13
ENSMUSG00000026915.16	Strbp	-3.14577	4.4936	1.12464e-15	1.66887e-13
ENSMUSG00000023571.4	C1qtnf12	-5.19431	2.67716	1.24164e-15	1.82657e-13
ENSMUSG00000027882.18	Stxbp3	-4.21111	3.22445	1.27984e-15	1.87398e-13
ENSMUSG00000031295.13	Phka2	-3.63773	3.05184	1.43131e-15	2.07568e-13
ENSMUSG00000046523.5	Kctd4	-4.95059	3.77593	1.68382e-15	2.39955e-13
ENSMUSG00000031731.16	Ap1g1	-3.64512	3.35969	1.68754e-15	2.39955e-13
ENSMUSG00000021209.12	Ppp4r4	-4.12615	2.68007	1.77604e-15	2.50363e-13
ENSMUSG00000031783.10	Polr2c	-4.15895	3.00454	1.82032e-15	2.55279e-13
ENSMUSG00000000605.9	Clcn4	-3.58851	3.89702	2.14392e-15	2.98203e-13
ENSMUSG00000043061.10	Tmem18	-8.74698	5.84166	2.23051e-15	3.07733e-13
ENSMUSG00000028249.15	Sdcbp	-5.14038	5.89373	2.32571e-15	3.18286e-13
ENSMUSG00000043535.13	Setx	-3.19815	3.21128	2.69105e-15	3.65346e-13
ENSMUSG00000047714.14	Ppp1r2	-5.48708	4.87981	2.73769e-15	3.70692e-13
ENSMUSG00000031820.9	Babam1	-5.7645	3.23555	3.22858e-15	4.34853e-13
ENSMUSG00000054061.8	Gm9934	-4.61612	2.13016	3.92965e-15	5.2167e-13
ENSMUSG00000059213.7	Ddn	-3.44309	2.75532	3.93447e-15	5.2167e-13
ENSMUSG00000021537.9	Cetn3	-4.91129	2.94142	4.23785e-15	5.6044e-13
ENSMUSG00000107707.1	Gm44286	-5.53621	4.5779	4.44201e-15	5.8441e-13
ENSMUSG00000013236.17	Ptprs	-2.90083	4.17521	5.42423e-15	7.00989e-13
ENSMUSG00000099689.6	Zfp383	-8.54145	6.75087	5.5004e-15	7.09038e-13
ENSMUSG00000004980.16	Hnrnpa2b1	-4.59739	5.64528	5.53175e-15	7.09495e-13
ENSMUSG00000042682.9	Selenok	-4.01635	3.71054	6.10238e-15	7.72973e-13
ENSMUSG00000061576.15	Dpp6	-3.82247	4.69097	6.08867e-15	7.72973e-13
ENSMUSG00000004798.14	Ulk2	-3.64755	3.16505	6.15975e-15	7.76734e-13
ENSMUSG00000040177.10	2310057M21Rik	-4.5707	5.8271	6.4083e-15	8.03746e-13
ENSMUSG00000062319.2	Gm10115	-5.57614	4.83855	6.63767e-15	8.26423e-13
ENSMUSG00000004266.15	Ptpn6	-4.82328	2.6351	7.11359e-15	8.81377e-13
ENSMUSG00000041685.16	Fcho2	-3.49467	3.73068	7.59938e-15	9.34761e-13
ENSMUSG00000025475.17	Adgra1	-4.34726	3.71119	8.04865e-15	9.86474e-13
ENSMUSG00000040760.11	Appl1	-3.31656	3.10154	8.41754e-15	1.02307e-12
ENSMUSG00000022791.17	Tnk2	-4.24448	4.00244	1.14488e-14	1.35913e-12
ENSMUSG00000018548.15	Trim37	-2.98179	2.38082	1.2257e-14	1.44167e-12
ENSMUSG00000054728.16	Phactr1	-3.65782	4.20994	1.31508e-14	1.53266e-12
ENSMUSG00000103373.1	Gm37238	-6.68452	4.50338	1.51147e-14	1.74957e-12
ENSMUSG00000030720.16	Cln3	-3.66917	3.32166	1.72428e-14	1.97353e-12
ENSMUSG00000062914.3	Olfr777	-4.67873	3.39028	1.90247e-14	2.15334e-12
ENSMUSG00000056050.12	Mia3	-4.8115	5.07933	2.0525e-14	2.30779e-12
ENSMUSG00000026821.15	Ralgds	-3.34573	2.71127	2.13006e-14	2.38974e-12
ENSMUSG00000039106.6	Htr5a	-2.91942	3.72898	2.26631e-14	2.53702e-12
ENSMUSG00000002679.14	Med6	-4.63685	3.11846	2.45317e-14	2.72825e-12
ENSMUSG00000087174.7	5530601H04Rik	-3.47706	3.1997	2.7334e-14	3.02017e-12
ENSMUSG00000032637.15	Atxn2l	-3.47121	2.80291	2.83203e-14	3.12239e-12
ENSMUSG00000056211.13	R3hdm1	-2.73611	5.04091	2.8581e-14	3.14434e-12
ENSMUSG00000103345.1	Gm10723	-3.9437	2.95851	3.12057e-14	3.41837e-12
ENSMUSG00000018428.15	Akap1	-4.40574	3.4931	3.37214e-14	3.67031e-12
ENSMUSG00000033981.14	Gria2	-3.03467	4.63715	3.60688e-14	3.91746e-12
ENSMUSG00000106864.3	Gtf3c2	-4.29353	5.37299	3.8046e-14	4.12342e-12
ENSMUSG00000097825.5	9630001P10Rik	-4.39415	2.9778	3.85286e-14	4.16688e-12
ENSMUSG00000037624.15	Kcnk2	-3.09289	1.69979	4.94067e-14	5.27628e-12
ENSMUSG00000035227.7	Spcs2	-6.1007	6.36431	5.07623e-14	5.39846e-12
ENSMUSG00000021936.14	Mapk8	-3.14006	3.55677	5.88484e-14	6.20669e-12
ENSMUSG00000112838.1	Gm47098	-6.73707	4.91388	7.20992e-14	7.40532e-12
ENSMUSG00000048626.5	Klf17	-8.4778	6.46481	1.00546e-13	1.02039e-11
ENSMUSG00000052137.11	Rbm12b2	-8.53778	6.16365	1.07666e-13	1.08617e-11
ENSMUSG00000025184.10	R3hcc1l	-3.66795	2.78211	1.08052e-13	1.08791e-11
ENSMUSG00000032184.5	Lysmd2	-4.10419	1.76831	1.54534e-13	1.5112e-11
ENSMUSG00000025266.11	Gnl3l	-3.90379	3.2492	1.86848e-13	1.77949e-11
ENSMUSG00000102136.1	Gm37107	-5.48419	2.62191	2.32529e-13	2.18197e-11
ENSMUSG00000024096.17	Ralbp1	-3.91959	5.23146	2.33973e-13	2.19149e-11
ENSMUSG00000029757.16	Dync1i1	-3.60022	3.02413	2.53567e-13	2.36202e-11
ENSMUSG00000038970.7	Lmtk2	-2.54269	2.2951	2.79777e-13	2.5826e-11
ENSMUSG00000045667.14	Smtnl2	-3.53552	2.24976	3.32602e-13	3.03185e-11
ENSMUSG00000000374.8	Trappc10	-3.31703	2.40022	3.40308e-13	3.09656e-11
ENSMUSG00000020419.11	Hormad2	-3.86009	1.81633	3.99485e-13	3.58392e-11
ENSMUSG00000105660.1	Gm42975	-5.96851	2.95612	4.2131e-13	3.77309e-11
ENSMUSG00000006649.17	Nphs1	-3.29264	2.90454	4.40806e-13	3.92018e-11
ENSMUSG00000026933.17	Camsap1	-3.51475	7.46327	4.54224e-13	4.01402e-11
ENSMUSG00000055371.17	Stam2	-3.37908	2.40957	4.54503e-13	4.01402e-11
ENSMUSG00000064735.1	Gm23057	-7.16649	3.97714	5.26161e-13	4.56785e-11
ENSMUSG00000020454.17	Eif4enif1	-2.95835	3.15784	6.13526e-13	5.26364e-11
ENSMUSG00000043668.13	Tox3	-3.76177	2.63552	6.32283e-13	5.40639e-11
ENSMUSG00000027330.16	Cdc25b	-3.37819	2.39953	6.32141e-13	5.40639e-11
ENSMUSG00000112234.1	Gm48427	-4.87385	3.40944	7.89154e-13	6.64752e-11
ENSMUSG00000030770.15	Parva	-3.32152	2.41024	8.39767e-13	7.01598e-11
ENSMUSG00000079293.11	Clec7a	-5.18674	2.92502	9.27217e-13	7.69621e-11
ENSMUSG00000103646.1	Gm37706	-4.35046	2.27258	9.59082e-13	7.93489e-11
ENSMUSG00000025197.9	Cyp2c23	-3.59998	2.43763	9.6506e-13	7.97143e-11
ENSMUSG00000072769.6	Gm10419	-3.10113	3.11375	1.14697e-12	9.30832e-11
ENSMUSG00000032112.10	Trappc4	-3.49684	4.06354	1.21099e-12	9.7812e-11
ENSMUSG00000036894.3	Rap2b	-2.99863	2.84893	1.28564e-12	1.03514e-10
ENSMUSG00000058071.4	Olfr818	-6.44986	3.88912	1.43336e-12	1.15045e-10
ENSMUSG00000058014.4	Olfr502	-4.90086	2.61579	1.54229e-12	1.23207e-10
ENSMUSG00000080790.1	Gm7638	-5.66244	2.68693	1.68559e-12	1.33402e-10
ENSMUSG00000036777.8	Anln	-2.99426	2.5497	1.69053e-12	1.33586e-10
ENSMUSG00000032348.6	Gsta4	-4.26881	1.67089	1.83394e-12	1.43585e-10
ENSMUSG00000020988.9	L2hgdh	-3.4049	2.36601	1.93047e-12	1.50221e-10
ENSMUSG00000102555.1	6430511E19Rik	-4.33667	3.02607	1.95676e-12	1.51812e-10
ENSMUSG00000096044.4	Pramel33	-6.93678	3.37476	2.03006e-12	1.56775e-10
ENSMUSG00000117296.1	Gm20742	-3.81373	1.74596	2.16852e-12	1.67215e-10
ENSMUSG00000025147.7	Mob2	-3.43823	2.25825	2.18548e-12	1.68268e-10
ENSMUSG00000022312.11	Eif3h	-3.89792	1.23602	2.54753e-12	1.93598e-10
ENSMUSG00000099061.1	Gm28050	-6.68881	3.36248	2.85284e-12	2.1416e-10
ENSMUSG00000071662.3	Polr2g	-5.52938	4.26148	2.99527e-12	2.24522e-10
ENSMUSG00000090751.2	Vmn2r63	-3.52754	2.48863	3.00598e-12	2.24995e-10
ENSMUSG00000019789.9	Hey2	-3.2756	2.33863	3.2189e-12	2.39526e-10
ENSMUSG00000034339.8	Cstdc7	-3.77528	1.84845	3.26001e-12	2.42233e-10
ENSMUSG00000000561.14	Wdr77	-4.63442	1.99437	3.52688e-12	2.59793e-10
ENSMUSG00000027254.13	Map1a	-2.70466	3.27491	3.53907e-12	2.59941e-10
ENSMUSG00000050821.14	Fam131a	-3.90675	1.79439	3.5464e-12	2.60105e-10
ENSMUSG00000085004.2	5430427M07Rik	-5.59343	3.59288	3.74623e-12	2.73974e-10
ENSMUSG00000116395.1	Gm49499	-4.34147	1.57981	4.02987e-12	2.93456e-10
ENSMUSG00000112056.1	Gm48181	-4.48561	3.23662	4.11046e-12	2.98898e-10
ENSMUSG00000042604.5	Kcna4	-3.19697	2.31271	4.1675e-12	3.02185e-10
ENSMUSG00000045657.3	Pcdhb10	-4.68391	1.57082	4.43563e-12	3.19359e-10
ENSMUSG00000050822.11	Slc29a4	-3.28318	1.92796	4.5171e-12	3.2431e-10
ENSMUSG00000036104.12	Rab3gap1	-2.5745	2.99192	4.87433e-12	3.48e-10
ENSMUSG00000020260.9	Pofut2	-2.83824	1.97906	5.10678e-12	3.62063e-10
ENSMUSG00000025066.9	Sfr1	-4.41191	2.66419	5.32025e-12	3.74597e-10
ENSMUSG00000109946.1	Brd3os	-4.00325	1.80755	5.35025e-12	3.75673e-10
ENSMUSG00000048919.5	Olfr223	-4.66221	2.80576	5.42098e-12	3.78902e-10
ENSMUSG00000040274.11	Cdk6	-2.5375	2.55341	5.61381e-12	3.91487e-10
ENSMUSG00000040612.13	Ildr2	-2.90732	3.52814	5.67473e-12	3.95195e-10
ENSMUSG00000037754.13	Ppp1r16b	-3.6313	6.28359	5.7978e-12	4.02667e-10
ENSMUSG00000110656.1	Gm20735	-4.2944	1.26891	6.21757e-12	4.28324e-10
ENSMUSG00000087651.3	1500009L16Rik	-2.98086	2.21573	6.50899e-12	4.47193e-10
ENSMUSG00000000743.9	Chmp1a	-3.13126	1.98088	6.61763e-12	4.53437e-10
ENSMUSG00000056708.5	Ier5	-3.26073	1.56517	6.67628e-12	4.56842e-10
ENSMUSG00000004319.15	Clcn3	-2.46096	3.05606	6.8793e-12	4.68223e-10
ENSMUSG00000032372.14	Plscr2	-3.92882	2.77484	7.44461e-12	5.04682e-10
ENSMUSG00000038156.16	Spon1	-3.04589	3.84833	8.18472e-12	5.49022e-10
ENSMUSG00000032099.3	Pate4	-6.28629	6.16701	8.22572e-12	5.50325e-10
ENSMUSG00000025243.15	Slc6a20b	-2.78602	2.34836	9.51575e-12	6.32488e-10
ENSMUSG00000026028.12	Trak2	-3.19392	2.89095	9.73904e-12	6.46487e-10
ENSMUSG00000105229.1	Gm43149	-4.85714	2.6394	9.77755e-12	6.48201e-10
ENSMUSG00000022811.17	Zfp148	-2.49989	2.67154	1.07088e-11	7.06267e-10
ENSMUSG00000063929.6	Cyp4a32	-5.82723	1.94704	1.09126e-11	7.17858e-10
ENSMUSG00000061626.6	Olfr68	-3.78986	2.01172	1.10349e-11	7.24965e-10
ENSMUSG00000024044.18	Epb41l3	-2.98499	4.84568	1.11458e-11	7.30373e-10
ENSMUSG00000007080.14	Pole	-2.29694	3.01115	1.16975e-11	7.60662e-10
ENSMUSG00000020801.8	Med31	-3.61773	1.99632	1.24059e-11	8.02644e-10
ENSMUSG00000105971.1	Gm43805	-7.48108	4.2737	1.24259e-11	8.02915e-10
ENSMUSG00000003662.10	Ciao1	-3.58575	1.96438	1.37107e-11	8.80364e-10
ENSMUSG00000024429.9	Gnl1	-3.55921	1.92646	1.44694e-11	9.25588e-10
ENSMUSG00000051527.11	Usp29	-2.18647	2.37723	1.47664e-11	9.43406e-10
ENSMUSG00000075376.10	Rc3h2	-2.48813	3.93258	1.54413e-11	9.82831e-10
ENSMUSG00000108217.1	Gm43883	-4.43628	3.40913	1.6664e-11	1.05409e-09
ENSMUSG00000035448.9	Ccr3	-3.97195	1.98335	1.71433e-11	1.08306e-09
ENSMUSG00000105104.1	Gm43729	-7.33254	3.94693	1.72269e-11	1.087e-09
ENSMUSG00000031134.16	Rbmx	-3.10073	2.99767	1.78159e-11	1.12001e-09
ENSMUSG00000020116.7	Pno1	-3.93451	2.06767	2.09903e-11	1.30035e-09
ENSMUSG00000104154.1	Gm38104	-4.60596	2.12171	2.12205e-11	1.31302e-09
ENSMUSG00000097288.1	Gm2155	-3.26771	1.31812	2.23173e-11	1.37755e-09
ENSMUSG00000102644.5	Thap6	-3.35332	2.84112	2.27615e-11	1.40327e-09
ENSMUSG00000064586.1	Gm25132	-5.06138	2.4371	2.3926e-11	1.47151e-09
ENSMUSG00000112443.1	Gm19007	-5.30137	2.91927	2.39944e-11	1.47394e-09
ENSMUSG00000089819.1	Gm15679	-4.31432	1.57499	2.48837e-11	1.52673e-09
ENSMUSG00000026692.12	Fmo4	-3.08962	1.78592	2.52582e-11	1.54785e-09
ENSMUSG00000045967.11	Gpr158	-3.15713	3.49354	2.63956e-11	1.61174e-09
ENSMUSG00000026023.16	Cdk15	-2.57361	1.92809	2.7126e-11	1.65239e-09
ENSMUSG00000048485.12	Zbtb8b	-2.44333	1.87164	2.91392e-11	1.76659e-09
ENSMUSG00000020794.13	Ube2g1	-2.76093	2.313	3.04298e-11	1.82962e-09
ENSMUSG00000104888.1	1500005C15Rik	-3.72784	1.24374	3.58385e-11	2.13222e-09
ENSMUSG00000110799.1	4930543K20Rik	-3.80192	2.76272	3.77892e-11	2.23785e-09
ENSMUSG00000041459.15	Tardbp	-2.64499	3.17274	3.81815e-11	2.25585e-09
ENSMUSG00000021066.9	Atl1	-2.34441	2.53308	3.93539e-11	2.31811e-09
ENSMUSG00000029249.15	Rest	-2.21081	2.9073	4.04445e-11	2.37307e-09
ENSMUSG00000021469.9	Msx2	-2.79869	1.37353	4.27368e-11	2.50182e-09
ENSMUSG00000053453.9	Thoc7	-3.23649	2.88005	4.35389e-11	2.54585e-09
ENSMUSG00000027940.18	Tpm3	-2.51877	2.02843	4.35998e-11	2.5465e-09
ENSMUSG00000071180.5	Smim15	-3.47593	3.21688	4.41259e-11	2.57428e-09
ENSMUSG00000028126.16	Pip5k1a	-2.21885	2.85752	4.43426e-11	2.58397e-09
ENSMUSG00000103761.1	Gm37859	-3.83193	2.41381	4.61669e-11	2.68415e-09
ENSMUSG00000115450.1	Gm4821	-5.64989	3.4532	4.63783e-11	2.69031e-09
ENSMUSG00000020974.6	Pole2	-2.49804	3.66939	4.73995e-11	2.74021e-09
ENSMUSG00000063659.11	Zbtb18	-2.95858	2.88281	5.21623e-11	2.98881e-09
ENSMUSG00000064722.1	Gm25857	-5.06144	2.03836	5.82493e-11	3.31858e-09
ENSMUSG00000094344.1	Gm11942	-3.93277	2.19821	6.05025e-11	3.43236e-09
ENSMUSG00000100029.1	D7Ertd128e	-3.3833	2.19488	6.05142e-11	3.43236e-09
ENSMUSG00000030134.11	Rasgef1a	-2.68958	1.61879	6.05826e-11	3.43236e-09
ENSMUSG00000020024.7	Cep83	-2.69996	2.23817	6.17883e-11	3.48906e-09
ENSMUSG00000086606.1	Gm13205	-5.50098	1.62287	6.27312e-11	3.53838e-09
ENSMUSG00000000881.12	Dlg3	-2.86992	1.96011	6.40571e-11	3.59728e-09
ENSMUSG00000020340.16	Cyfip2	-3.04874	4.66503	6.76492e-11	3.7865e-09
ENSMUSG00000052684.4	Jun	-2.35754	2.83358	6.83231e-11	3.81585e-09
ENSMUSG00000005299.6	Letm1	-2.45192	2.01986	6.93028e-11	3.86634e-09
ENSMUSG00000048647.9	Exd1	-2.85433	1.9916	7.33835e-11	4.07618e-09
ENSMUSG00000020354.15	Sgcd	-3.19721	3.68905	7.49339e-11	4.15777e-09
ENSMUSG00000028552.13	Eps15	-2.36646	2.7187	7.52921e-11	4.17311e-09
ENSMUSG00000104759.2	Ranbp2-ps12	-5.50782	3.20442	7.73984e-11	4.2852e-09
ENSMUSG00000058297.16	Spock2	-3.19952	3.32817	7.87055e-11	4.35285e-09
ENSMUSG00000043313.6	Pcdhb19	-3.03148	1.64474	8.14279e-11	4.48882e-09
ENSMUSG00000091507.1	Gm17194	-5.21043	2.00096	8.27448e-11	4.54669e-09
ENSMUSG00000039419.17	Cntnap2	-2.88797	4.16551	8.44955e-11	4.63291e-09
ENSMUSG00000050587.14	Lrrc4c	-2.86398	2.41434	8.46339e-11	4.63552e-09
ENSMUSG00000091264.3	Smim13	-3.82071	5.1501	8.58875e-11	4.69411e-09
ENSMUSG00000021910.15	Nisch	-2.10133	3.24931	8.62552e-11	4.70413e-09
ENSMUSG00000025795.8	Rassf3	-2.70962	1.3027	8.89911e-11	4.83784e-09
ENSMUSG00000023971.9	Rrp36	-3.16982	2.27442	9.03725e-11	4.90249e-09
ENSMUSG00000073970.1	Olfr555	-4.86514	1.22302	9.20255e-11	4.97371e-09
ENSMUSG00000027109.16	Sp3	-3.19229	2.98191	9.20751e-11	4.97371e-09
ENSMUSG00000032589.14	Bsn	-2.16032	2.93116	9.24358e-11	4.98792e-09
ENSMUSG00000115512.1	Rpl17-ps7	-4.30241	1.336	1.02904e-10	5.49472e-09
ENSMUSG00000094606.8	Vmn2r50	-4.17342	1.91916	1.03795e-10	5.53073e-09
ENSMUSG00000022474.15	Pmm1	-3.16403	2.27989	1.04632e-10	5.56952e-09
ENSMUSG00000022602.14	Arc	-2.98786	1.67218	1.07024e-10	5.68498e-09
ENSMUSG00000108137.1	Gm44053	-9.92107	6.1548	1.09403e-10	5.79327e-09
ENSMUSG00000083387.1	Gm11860	-4.23374	1.04224	1.16905e-10	6.13955e-09
ENSMUSG00000106826.1	Gm42583	-3.02814	2.58471	1.18012e-10	6.19134e-09
ENSMUSG00000077178.1	Gm25756	-5.70686	1.54136	1.18419e-10	6.20629e-09
ENSMUSG00000108195.1	Gm44415	-3.69713	2.90019	1.22407e-10	6.40217e-09
ENSMUSG00000116528.1	Gm49508	-5.13834	0.953467	1.37368e-10	7.12622e-09
ENSMUSG00000091193.2	Gm17333	-4.42919	2.18599	1.38472e-10	7.17622e-09
ENSMUSG00000007617.18	Homer1	-2.2508	3.09793	1.41556e-10	7.29165e-09
ENSMUSG00000058503.11	Fam133b	-2.7162	3.24748	1.42778e-10	7.3379e-09
ENSMUSG00000113055.1	Gm48700	-3.39267	2.56716	1.46371e-10	7.50181e-09
ENSMUSG00000026817.14	Ak1	-4.08307	3.63484	1.51092e-10	7.72826e-09
ENSMUSG00000112387.1	1700021G15Rik	-3.63329	1.12211	1.56912e-10	8.0099e-09
ENSMUSG00000084276.1	Gm8317	-5.49766	3.31825	1.60323e-10	8.17583e-09
ENSMUSG00000030310.10	Slc6a1	-2.79823	2.57562	1.63033e-10	8.28095e-09
ENSMUSG00000022752.9	Tomm70a	-3.34657	5.83199	1.65802e-10	8.41319e-09
ENSMUSG00000082423.1	Gm15148	-4.37735	1.7959	1.67887e-10	8.51055e-09
ENSMUSG00000038170.15	Pde4dip	-2.33574	3.67383	1.83194e-10	9.24977e-09
ENSMUSG00000031636.7	Pdlim3	-2.77361	1.9823	1.84961e-10	9.32974e-09
ENSMUSG00000085264.1	Gm15581	-3.53688	2.94958	1.86365e-10	9.39129e-09
ENSMUSG00000030498.15	Gas2	-2.63218	1.878	1.95862e-10	9.83102e-09
ENSMUSG00000031461.4	Myom2	-2.48692	2.02546	1.97522e-10	9.8852e-09
ENSMUSG00000022678.16	Nde1	-3.38893	1.8415	1.97947e-10	9.89677e-09
ENSMUSG00000064862.1	Gm25038	-4.6322	1.21979	2.01286e-10	1.00538e-08
ENSMUSG00000090417.4	Vmn2r94	-2.47813	1.85921	2.21392e-10	1.09616e-08
ENSMUSG00000097899.2	Gm16894	-3.50072	2.36165	2.23852e-10	1.10619e-08
ENSMUSG00000036499.9	Eea1	-2.37598	2.81587	2.29526e-10	1.13095e-08
ENSMUSG00000112932.1	Gm48308	-3.98737	1.89928	2.49096e-10	1.2168e-08
ENSMUSG00000099747.1	1700025K24Rik	-4.11241	1.12015	2.69272e-10	1.30537e-08
ENSMUSG00000091337.3	Eid1	-3.1417	3.16954	2.70179e-10	1.30852e-08
ENSMUSG00000021764.8	Ndufs4	-3.62202	2.38724	2.71383e-10	1.31311e-08
ENSMUSG00000094122.1	Rpl31-ps9	-3.75975	1.30308	2.78573e-10	1.34535e-08
ENSMUSG00000106192.1	Gm42818	-3.87916	0.237313	2.8126e-10	1.35704e-08
ENSMUSG00000027324.1	Rpusd2	-2.76217	1.32692	2.81608e-10	1.35743e-08
ENSMUSG00000060314.13	Zfp941	-2.86726	1.20493	2.87839e-10	1.38355e-08
ENSMUSG00000036707.16	Cab39	-2.79519	3.48708	2.90839e-10	1.39666e-08
ENSMUSG00000108106.2	Gm5886	-3.07339	1.27566	2.94756e-10	1.41281e-08
ENSMUSG00000022893.14	Adamts1	-3.18428	3.31156	2.9566e-10	1.41581e-08
ENSMUSG00000024359.9	Hspa9	-3.1998	2.92996	3.02086e-10	1.44253e-08
ENSMUSG00000039462.4	Col10a1	-3.18439	1.28894	3.11759e-10	1.48594e-08
ENSMUSG00000026110.15	Mgat4a	-2.25735	2.48195	3.28195e-10	1.5599e-08
ENSMUSG00000006800.14	Sulf2	-2.95633	4.06751	3.30115e-10	1.56757e-08
ENSMUSG00000025038.7	Efhc2	-3.58437	1.79229	3.34243e-10	1.58276e-08
ENSMUSG00000040943.12	Tet2	-2.48608	3.80874	3.39091e-10	1.60028e-08
ENSMUSG00000105923.4	A830019L24Rik	-3.21377	1.3573	3.4419e-10	1.62171e-08
ENSMUSG00000081778.1	Gm6325	-3.85181	2.50218	3.5065e-10	1.64822e-08
ENSMUSG00000015134.15	Aldh1a3	-2.56723	1.98799	3.80712e-10	1.78295e-08
ENSMUSG00000108180.1	Gm44141	-3.70956	0.863771	3.85475e-10	1.80196e-08
ENSMUSG00000026824.11	Kcnj3	-2.9703	2.75176	3.8767e-10	1.81056e-08
ENSMUSG00000012076.8	Brms1l	-2.60653	1.59106	4.05689e-10	1.89298e-08
ENSMUSG00000098685.1	Gm27224	-4.07661	2.06721	4.16441e-10	1.9396e-08
ENSMUSG00000040699.13	Limd2	-2.58304	0.763677	4.32796e-10	2.01211e-08
ENSMUSG00000050751.14	Pgbd5	-2.56544	2.14454	4.48874e-10	2.07928e-08
ENSMUSG00000105910.1	Gm43539	-4.60318	1.28391	4.56168e-10	2.10733e-08
ENSMUSG00000086373.8	Gm11978	-3.83762	2.73556	4.56994e-10	2.10924e-08
ENSMUSG00000052584.10	Serp2	-3.65084	1.09234	4.65734e-10	2.1399e-08
ENSMUSG00000033287.16	Kctd17	-3.09739	1.75505	4.99857e-10	2.28435e-08
ENSMUSG00000038844.10	Kif16b	-2.21099	2.91033	5.42195e-10	2.46021e-08
ENSMUSG00000050556.9	Kcnb1	-2.52212	3.97099	5.7014e-10	2.58014e-08
ENSMUSG00000100769.1	Gm28893	-4.01972	1.41438	6.02705e-10	2.72268e-08
ENSMUSG00000096780.7	Tmem181b-ps	-3.5953	2.70522	6.05665e-10	2.73363e-08
ENSMUSG00000081281.1	Rpl7-ps9	-3.79378	2.58585	6.33855e-10	2.85834e-08
ENSMUSG00000102404.1	5530400K19Rik	-3.69053	0.410025	6.5935e-10	2.95504e-08
ENSMUSG00000057933.10	Gsta2	-3.58604	0.574969	6.82477e-10	3.05065e-08
ENSMUSG00000026150.14	Mff	-2.53452	3.30566	6.95105e-10	3.10438e-08
ENSMUSG00000020250.10	Txnrd1	-2.53875	2.17977	7.31037e-10	3.25063e-08
ENSMUSG00000020873.15	Slc35b1	-2.49345	1.43102	7.61596e-10	3.38062e-08
ENSMUSG00000109417.1	Gm44859	-3.86513	0.213948	7.81215e-10	3.46169e-08
ENSMUSG00000043419.11	Rnf227	-2.29151	1.67143	7.96844e-10	3.52483e-08
ENSMUSG00000025531.14	Chm	-2.90009	2.562	8.0929e-10	3.56807e-08
ENSMUSG00000103821.1	D430013B06Rik	-3.32655	1.53778	8.11577e-10	3.57451e-08
ENSMUSG00000084925.8	1810062O18Rik	-2.75043	2.49497	8.21148e-10	3.61043e-08
ENSMUSG00000113477.1	Gm45965	-4.27092	0.376463	8.39122e-10	3.67995e-08
ENSMUSG00000021711.16	Trappc13	-2.85868	2.83504	8.76226e-10	3.82951e-08
ENSMUSG00000017299.13	Dnttip1	-2.65643	1.15272	8.82749e-10	3.85472e-08
ENSMUSG00000087260.5	Lamtor5	-4.34256	1.83509	9.13164e-10	3.98073e-08
ENSMUSG00000032423.12	Syncrip	-3.18776	5.17407	9.17422e-10	3.99177e-08
ENSMUSG00000116239.1	Gm49520	-4.6077	0.596913	9.43811e-10	4.09233e-08
ENSMUSG00000037503.12	Fam168b	-2.4811	1.15568	9.44377e-10	4.09233e-08
ENSMUSG00000021967.4	Mrpl57	-2.54687	1.0203	9.66615e-10	4.18514e-08
ENSMUSG00000115871.1	Gm49507	-3.99496	2.0286	1.01751e-09	4.39803e-08
ENSMUSG00000014867.9	Surf4	-2.50502	0.605821	1.07822e-09	4.64082e-08
ENSMUSG00000077276.1	Gm22784	-5.16813	1.2948	1.11531e-09	4.78834e-08
ENSMUSG00000103609.1	Gm37022	-2.77814	0.691777	1.15201e-09	4.92931e-08
ENSMUSG00000015966.17	Il17rb	-2.97991	2.00793	1.21915e-09	5.19048e-08
ENSMUSG00000102950.1	Gm37018	-2.92988	1.56724	1.22175e-09	5.1929e-08
ENSMUSG00000082372.1	Gm4772	-3.63524	0.974809	1.25383e-09	5.31599e-08
ENSMUSG00000096704.1	NA	-6.41098	3.11392	1.29839e-09	5.4912e-08
ENSMUSG00000052613.16	Pcdh15	-2.11105	5.39551	1.31203e-09	5.54429e-08
ENSMUSG00000045427.13	Hnrnph2	-2.63837	1.69392	1.37227e-09	5.78448e-08
ENSMUSG00000027901.12	Dennd2d	-2.67962	2.30294	1.41234e-09	5.94359e-08
ENSMUSG00000032192.9	Gnb5	-2.72494	1.57588	1.45592e-09	6.11186e-08
ENSMUSG00000094626.1	Tmem121b	-2.18321	1.42461	1.49124e-09	6.22433e-08
ENSMUSG00000036395.15	Glb1l2	-2.49883	1.78475	1.62138e-09	6.71806e-08
ENSMUSG00000048186.14	Bend7	-2.10868	1.46532	1.64137e-09	6.79539e-08
ENSMUSG00000026931.10	1700019N19Rik	-3.22154	0.456093	1.73547e-09	7.15593e-08
ENSMUSG00000045414.7	Dipk2a	-2.3056	1.44876	1.74311e-09	7.16502e-08
ENSMUSG00000075370.12	Igll1	-3.04197	0.262489	1.77043e-09	7.26487e-08
ENSMUSG00000105644.1	Gm19739	-3.95662	1.37264	1.81677e-09	7.43116e-08
ENSMUSG00000001175.14	Calm1	-2.91534	5.75319	1.82931e-09	7.47047e-08
ENSMUSG00000039585.15	Myo9a	-1.64011	1.83699	1.8849e-09	7.66679e-08
ENSMUSG00000085148.1	Mir22hg	-3.03085	1.29608	1.89183e-09	7.68275e-08
ENSMUSG00000071000.3	Olfr155	-2.65388	1.30313	1.98705e-09	8.02475e-08
ENSMUSG00000028613.14	Lrp8	-2.04597	2.39419	2.03542e-09	8.20065e-08
ENSMUSG00000027765.6	P2ry1	-2.63385	1.30542	2.09789e-09	8.43237e-08
ENSMUSG00000025967.16	Eef1b2	-2.76984	2.15302	2.18661e-09	8.75271e-08
ENSMUSG00000027823.9	Gmps	-2.68633	3.02412	2.18633e-09	8.75271e-08
ENSMUSG00000085068.1	Gm15895	-3.89111	1.37492	2.35417e-09	9.35202e-08
ENSMUSG00000031379.13	Pir	-2.72509	2.32165	2.44232e-09	9.67957e-08
ENSMUSG00000029267.17	Mtf2	-2.62547	3.91561	2.44765e-09	9.69319e-08
ENSMUSG00000064622.1	Gm22304	-4.18396	0.747577	2.47409e-09	9.79028e-08
ENSMUSG00000033475.15	Tomm6	-5.21161	1.71237	2.47865e-09	9.80074e-08
ENSMUSG00000025372.16	Baiap2	-2.41118	2.26846	2.71229e-09	1.0634e-07
ENSMUSG00000084119.1	Gm12351	-3.56577	0.696209	2.73231e-09	1.06878e-07
ENSMUSG00000065620.1	Gm24764	-4.18184	0.7559	2.83255e-09	1.10545e-07
ENSMUSG00000042064.13	Myo3b	-2.16266	1.9728	2.83618e-09	1.10602e-07
ENSMUSG00000103346.1	C230057A21Rik	-2.90401	1.02957	3.17235e-09	1.22681e-07
ENSMUSG00000089014.1	Gm25520	-3.92265	0.371377	3.18647e-09	1.23134e-07
ENSMUSG00000037697.19	Ddhd1	-1.8927	3.30508	3.22252e-09	1.24339e-07
ENSMUSG00000000826.16	Dnajc5	-2.22942	1.97375	3.32456e-09	1.27889e-07
ENSMUSG00000028530.14	Jak1	-2.05665	2.43399	3.38992e-09	1.30109e-07
ENSMUSG00000100044.1	Gm9553	-3.65667	1.78434	3.43141e-09	1.31504e-07
ENSMUSG00000029363.14	Rfc5	-2.4288	1.43073	3.44367e-09	1.31776e-07
ENSMUSG00000043716.13	Rpl7	-2.72519	3.71358	3.5272e-09	1.3477e-07
ENSMUSG00000026991.20	Pkp4	-2.31797	2.71149	3.66083e-09	1.39251e-07
ENSMUSG00000107772.1	Gm5311	-3.89132	0.764359	3.71641e-09	1.4126e-07
ENSMUSG00000051790.15	Nlgn2	-1.87675	1.54648	3.83987e-09	1.45519e-07
ENSMUSG00000033720.12	Sfxn5	-2.20934	2.38698	3.86708e-09	1.46441e-07
ENSMUSG00000010095.13	Slc3a2	-2.41192	2.41102	3.91113e-09	1.47671e-07
ENSMUSG00000019478.16	Rab4a	-2.28495	0.894373	4.13825e-09	1.55556e-07
ENSMUSG00000054304.3	D130007C19Rik	-3.00064	2.00332	4.15387e-09	1.55939e-07
ENSMUSG00000037984.9	Neurod6	-3.73411	2.60814	4.22879e-09	1.58493e-07
ENSMUSG00000048924.14	Ccdc125	-2.36136	1.97941	4.24489e-09	1.58979e-07
ENSMUSG00000028785.13	Hpca	-2.67224	1.82726	4.27008e-09	1.59689e-07
ENSMUSG00000005534.10	Insr	-1.90459	3.05647	4.3211e-09	1.61478e-07
ENSMUSG00000106068.1	Gm9497	-3.54797	0.864714	4.53227e-09	1.69122e-07
ENSMUSG00000089995.2	Gm15716	-4.0184	2.27385	4.56079e-09	1.69896e-07
ENSMUSG00000038347.15	Tcte2	-2.42408	1.05846	4.563e-09	1.69896e-07
ENSMUSG00000098104.1	Gm6085	-2.67918	1.94889	4.61813e-09	1.71823e-07
ENSMUSG00000085532.1	B430319H21Rik	-3.96956	0.464572	4.63101e-09	1.72052e-07
ENSMUSG00000005371.15	Fbxo11	-1.70968	1.82969	4.62887e-09	1.72052e-07
ENSMUSG00000046230.10	Vps13a	-1.65236	2.62878	4.67749e-09	1.73526e-07
ENSMUSG00000065572.1	Mir130b	-4.12064	0.642849	4.7717e-09	1.76636e-07
ENSMUSG00000065127.1	NA	-3.75468	0.580455	4.81535e-09	1.77865e-07
ENSMUSG00000062105.5	Olfr183	-3.31152	2.33395	4.87743e-09	1.79898e-07
ENSMUSG00000100280.2	Gm28417	-2.72611	1.2473	4.94782e-09	1.8223e-07
ENSMUSG00000036430.8	Tbcc	-2.49779	0.981597	5.11875e-09	1.88119e-07
ENSMUSG00000007850.16	Hnrnph1	-2.50799	2.67717	5.18097e-09	1.90268e-07
ENSMUSG00000085438.1	Oip5os1	-2.09872	2.19846	5.19827e-09	1.90766e-07
ENSMUSG00000015291.10	Gdi1	-3.20247	3.16738	5.27948e-09	1.93469e-07
ENSMUSG00000111382.1	Gm47536	-4.18119	1.0471	5.36463e-09	1.96026e-07
ENSMUSG00000021196.14	Pfkp	-2.60709	4.79707	5.35728e-09	1.96026e-07
ENSMUSG00000044647.16	Csrnp3	-2.10496	2.41076	5.58073e-09	2.03195e-07
ENSMUSG00000088244.1	Gm25909	-4.10908	0.724038	5.65903e-09	2.05606e-07
ENSMUSG00000099264.1	Mir6411	-4.62616	1.61149	5.76255e-09	2.09218e-07
ENSMUSG00000069668.4	Sult3a1	-4.1076	2.54668	5.90263e-09	2.14e-07
ENSMUSG00000035517.17	Tdrd7	-2.18117	1.50781	5.92901e-09	2.14804e-07
ENSMUSG00000054408.9	Spcs3	-2.56585	1.66051	6.01188e-09	2.17497e-07
ENSMUSG00000080054.3	Rpl12-ps1	-3.24692	0.876325	6.05383e-09	2.18705e-07
ENSMUSG00000086479.2	Gm16014	-4.33439	1.57898	6.07038e-09	2.19148e-07
ENSMUSG00000112699.1	Gm48474	-4.08821	0.727026	6.273e-09	2.26302e-07
ENSMUSG00000097162.2	2310010J17Rik	-4.04738	1.376	6.33188e-09	2.27622e-07
ENSMUSG00000073705.10	Cenps	-2.43962	0.892744	6.32889e-09	2.27622e-07
ENSMUSG00000021686.6	Ap3b1	-2.10536	1.7528	6.7702e-09	2.42355e-07
ENSMUSG00000039911.13	Spsb1	-2.3046	1.78121	7.175e-09	2.56307e-07
ENSMUSG00000020745.15	Pafah1b1	-2.1742	2.93078	7.40547e-09	2.63801e-07
ENSMUSG00000032121.9	Tmem218	-2.94632	1.76826	7.48184e-09	2.66336e-07
ENSMUSG00000099032.2	Tcf24	-2.67579	2.6141	7.60031e-09	2.69988e-07
ENSMUSG00000084771.8	A230072E10Rik	-2.26412	2.39225	8.19587e-09	2.89533e-07
ENSMUSG00000061751.16	Kalrn	-2.42654	5.42013	8.29055e-09	2.92628e-07
ENSMUSG00000116569.1	Gm49620	-1.72477	2.0416	8.29497e-09	2.92628e-07
ENSMUSG00000086370.8	Ftx	-1.92273	1.38848	8.38339e-09	2.95339e-07
ENSMUSG00000087219.1	Gm13376	-4.1218	2.4308	8.77098e-09	3.0772e-07
ENSMUSG00000024079.4	Eif2ak2	-2.43974	1.79959	8.90495e-09	3.12205e-07
ENSMUSG00000053128.15	Rnf26	-2.66931	0.6568	9.01128e-09	3.155e-07
ENSMUSG00000029684.14	Wasl	-2.3867	2.78436	9.11655e-09	3.1853e-07
ENSMUSG00000074305.9	Peak1	-1.98931	2.32021	9.13467e-09	3.18945e-07
ENSMUSG00000039234.11	Sec24d	-2.02575	1.76845	9.21609e-09	3.2091e-07
ENSMUSG00000080941.1	Gm16056	-2.98969	0.0221183	9.36447e-09	3.25652e-07
ENSMUSG00000059003.12	Grin2a	-1.89694	2.7425	9.46365e-09	3.28633e-07
ENSMUSG00000049327.17	Kmt5a	-1.97446	2.26879	9.66899e-09	3.3508e-07
ENSMUSG00000018848.4	Rars	-2.14124	0.784779	9.89257e-09	3.42596e-07
ENSMUSG00000062524.4	Ncr1	-3.08229	0.216063	1.00362e-08	3.46864e-07
ENSMUSG00000002718.14	Cse1l	-2.311	2.30064	1.05067e-08	3.62144e-07
ENSMUSG00000108550.1	Gm44736	-4.21661	1.57524	1.09025e-08	3.74271e-07
ENSMUSG00000096014.1	Sox1	-2.03187	1.77585	1.22113e-08	4.14185e-07
ENSMUSG00000028809.16	Srrm1	-1.91257	2.95203	1.23269e-08	4.17296e-07
ENSMUSG00000033396.13	Spg11	-1.98007	1.82012	1.24115e-08	4.19861e-07
ENSMUSG00000031540.13	Kat6a	-2.10947	1.83453	1.25324e-08	4.2367e-07
ENSMUSG00000025374.13	Nabp2	-2.55383	0.81331	1.27061e-08	4.27843e-07
ENSMUSG00000084917.3	Gm17477	-2.59185	1.50416	1.27854e-08	4.29946e-07
ENSMUSG00000097013.1	NA	-2.8619	2.18426	1.2817e-08	4.30723e-07
ENSMUSG00000034239.14	Gm884	-2.01982	1.68766	1.30514e-08	4.38024e-07
ENSMUSG00000083577.1	Gm12432	-4.06551	1.08056	1.36091e-08	4.55245e-07
ENSMUSG00000082046.1	Gm14464	-2.17418	0.608017	1.39215e-08	4.6478e-07
ENSMUSG00000105803.1	Gm43526	-4.06025	2.91314	1.39716e-08	4.65541e-07
ENSMUSG00000003518.13	Dusp3	-2.59638	2.55694	1.4017e-08	4.66749e-07
ENSMUSG00000091059.2	Vmn2r14	-2.52143	0.854081	1.40304e-08	4.6689e-07
ENSMUSG00000085516.1	4930538E20Rik	-3.14543	1.56282	1.42223e-08	4.7245e-07
ENSMUSG00000048915.12	Efna5	-1.89093	1.23939	1.42818e-08	4.73406e-07
ENSMUSG00000106438.1	Gm32051	-3.06828	2.58358	1.43903e-08	4.7669e-07
ENSMUSG00000113553.1	Gm40932	-2.89416	0.285226	1.47012e-08	4.84787e-07
ENSMUSG00000038894.7	Irs2	-2.10878	2.00578	1.47834e-08	4.87184e-07
ENSMUSG00000110084.1	Gm45257	-2.65897	2.21464	1.50765e-08	4.96522e-07
ENSMUSG00000106448.1	Gm43486	-2.48129	1.37755	1.51493e-08	4.98598e-07
ENSMUSG00000104937.1	Gm43057	-4.07729	1.07198	1.53111e-08	5.03599e-07
ENSMUSG00000079283.2	2310009B15Rik	-2.81843	1.58164	1.56835e-08	5.15517e-07
ENSMUSG00000024477.3	Pggt1b	-3.05343	2.24402	1.60528e-08	5.2596e-07
ENSMUSG00000031292.14	Cdkl5	-2.01836	3.28383	1.63478e-08	5.34256e-07
ENSMUSG00000020634.12	Ubxn2a	-2.22454	1.27811	1.65219e-08	5.38816e-07
ENSMUSG00000057614.6	Gnai1	-2.15516	1.99246	1.65296e-08	5.38816e-07
ENSMUSG00000103485.1	Gm38001	-2.56953	1.32328	1.66072e-08	5.40654e-07
ENSMUSG00000087207.8	Gm13147	-3.45488	0.471184	1.66816e-08	5.42732e-07
ENSMUSG00000114019.1	Gm47155	-3.23679	0.893839	1.68467e-08	5.47055e-07
ENSMUSG00000112136.1	Gm40692	-2.1203	-0.143347	1.69384e-08	5.49684e-07
ENSMUSG00000117238.1		-2.48166	0.993574	1.83053e-08	5.90663e-07
ENSMUSG00000021770.11	Samd8	-1.61103	1.7548	1.83209e-08	5.90795e-07
ENSMUSG00000081931.1	Gm15211	-3.43992	0.501527	1.85141e-08	5.95894e-07
ENSMUSG00000077127.1	Mir743	-3.58914	0.0206759	1.91006e-08	6.13997e-07
ENSMUSG00000034064.14	Poglut1	-2.32914	1.5811	1.91682e-08	6.15783e-07
ENSMUSG00000087305.8	A430035B10Rik	-2.49952	1.66443	1.92461e-08	6.17896e-07
ENSMUSG00000114412.1	4930405A10Rik	-3.29383	1.2748	1.97593e-08	6.33575e-07
ENSMUSG00000097908.7	4933404O12Rik	-1.86546	1.86163	2.10005e-08	6.71267e-07
ENSMUSG00000040701.16	Ap1g2	-2.17348	2.06023	2.11374e-08	6.75218e-07
ENSMUSG00000093383.1	Gm20642	-3.76756	2.6138	2.12022e-08	6.76444e-07
ENSMUSG00000086721.2	Gm13750	-3.55984	0.555976	2.13437e-08	6.80108e-07
ENSMUSG00000026269.14	Rnpepl1	-1.67009	1.54737	2.19387e-08	6.9776e-07
ENSMUSG00000039037.5	St6galnac5	-2.57687	3.05607	2.21903e-08	7.04884e-07
ENSMUSG00000093033.1	NA	-3.48867	0.0710215	2.23665e-08	7.10038e-07
ENSMUSG00000085705.1	Gm16046	-2.78568	0.612862	2.26075e-08	7.16353e-07
ENSMUSG00000090304.4	Vmn2r99	-2.70572	2.06136	2.26322e-08	7.16691e-07
ENSMUSG00000070493.3	Chchd2	-3.23581	2.65039	2.35903e-08	7.43476e-07
ENSMUSG00000022288.1	4930447A16Rik	-3.35391	0.201273	2.37736e-08	7.48656e-07
ENSMUSG00000054459.8	Vsnl1	-3.48799	5.88869	2.40426e-08	7.55728e-07
ENSMUSG00000068122.10	Agtr2	-2.77539	0.689127	2.43509e-08	7.64476e-07
ENSMUSG00000032349.13	Elovl5	-2.12039	0.922278	2.43771e-08	7.6483e-07
ENSMUSG00000050966.9	Lin28a	-2.05816	1.6987	2.51496e-08	7.86167e-07
ENSMUSG00000027282.17	Mtch2	-2.33238	2.34689	2.56514e-08	8.00873e-07
ENSMUSG00000024234.7	Mtpap	-2.21785	1.18535	2.66754e-08	8.30305e-07
ENSMUSG00000108474.1	Gm44895	-2.95154	1.52555	2.69828e-08	8.39362e-07
ENSMUSG00000072763.2	5430403G16Rik	-2.65886	1.67447	2.81146e-08	8.73504e-07
ENSMUSG00000059742.10	Kcnh7	-2.04828	3.33217	2.81456e-08	8.73936e-07
ENSMUSG00000085622.9	3110056K07Rik	-2.27697	1.50976	2.83016e-08	8.78244e-07
ENSMUSG00000113154.1	Gm48713	-2.7374	2.25685	2.84528e-08	8.82399e-07
ENSMUSG00000030411.16	Nova2	-1.84826	2.10743	2.85275e-08	8.83642e-07
ENSMUSG00000086779.1	Gm13562	-3.02946	0.839086	2.85667e-08	8.84019e-07
ENSMUSG00000096926.1	NA	-2.69673	0.860929	2.85743e-08	8.84019e-07
ENSMUSG00000064081.4	Gm8973	-2.87587	0.629747	2.86476e-08	8.85549e-07
ENSMUSG00000010376.15	Nedd8	-2.52228	1.25114	2.87466e-08	8.87736e-07
ENSMUSG00000010054.4	Tusc2	-2.59416	1.82102	2.92767e-08	9.02467e-07
ENSMUSG00000049624.14	Slc17a5	-2.40516	1.82602	2.93353e-08	9.03729e-07
ENSMUSG00000106447.1	Gm42957	-3.07411	1.11171	2.99328e-08	9.20471e-07
ENSMUSG00000037351.9	Actr1b	-2.48568	1.168	3.00291e-08	9.22874e-07
ENSMUSG00000106202.1	Gm43727	-2.96598	1.62	3.00995e-08	9.24482e-07
ENSMUSG00000019433.9	Gipc1	-2.04443	0.321805	3.02714e-08	9.28086e-07
ENSMUSG00000111560.1	Gm35262	-4.2656	1.5235	3.03442e-08	9.29759e-07
ENSMUSG00000042751.14	Nmnat2	-2.12893	1.51926	3.12036e-08	9.54375e-07
ENSMUSG00000032782.19	Cntrob	-1.83415	1.61202	3.13558e-08	9.58454e-07
ENSMUSG00000046447.3	Camk2n1	-3.05187	5.58298	3.14694e-08	9.61353e-07
ENSMUSG00000087158.1	Gm14093	-3.01022	-0.100419	3.17196e-08	9.67838e-07
ENSMUSG00000045126.2	Olfr1445	-3.77603	1.12539	3.17572e-08	9.68405e-07
ENSMUSG00000018776.10	Slc35g3	-2.89248	1.5245	3.24385e-08	9.8741e-07
ENSMUSG00000006024.13	Napa	-2.3224	1.32931	3.28118e-08	9.98178e-07
ENSMUSG00000020684.14	Rasl10b	-2.37399	1.14823	3.31302e-08	1.00667e-06
ENSMUSG00000088020.1	Gm22762	-3.55072	0.595317	3.33085e-08	1.01148e-06
ENSMUSG00000045421.2	Olfr1390	-2.87279	0.313803	3.4165e-08	1.03626e-06
ENSMUSG00000086731.1	Sox5os5	-2.87553	-0.200072	3.42612e-08	1.03856e-06
ENSMUSG00000082121.1	Gm8199	-3.03836	0.17433	3.52232e-08	1.06456e-06
ENSMUSG00000087640.1	Gm14798	-3.38003	0.624763	3.58698e-08	1.08218e-06
ENSMUSG00000031492.13	Chrnb3	-2.42412	1.73181	3.67416e-08	1.1073e-06
ENSMUSG00000068815.3	Olfr1143	-2.64899	0.341735	3.77464e-08	1.13477e-06
ENSMUSG00000049106.7	Dcaf5	-1.99485	3.40525	3.80653e-08	1.14301e-06
ENSMUSG00000029634.15	Rnf6	-2.32635	1.71806	3.89531e-08	1.16692e-06
ENSMUSG00000004937.6	Sgta	-2.25932	1.21771	3.95325e-08	1.18034e-06
ENSMUSG00000107436.1	Gm44416	-2.11811	0.124996	4.00935e-08	1.19199e-06
ENSMUSG00000117187.1	Gm4708	-3.10728	1.21022	4.10506e-08	1.2169e-06
ENSMUSG00000005907.14	Pex1	-1.98758	3.10783	4.3468e-08	1.27744e-06
ENSMUSG00000017057.9	Il13ra1	-1.97292	0.586929	4.45007e-08	1.30478e-06
ENSMUSG00000105114.1	Amd-ps5	-3.38294	0.34084	4.59575e-08	1.34364e-06
ENSMUSG00000022110.13	Sucla2	-2.43557	1.85581	4.62829e-08	1.35238e-06
ENSMUSG00000028955.3	Vamp3	-2.52745	1.82524	4.66299e-08	1.36174e-06
ENSMUSG00000086839.7	Gm11973	-2.52032	0.635857	4.76809e-08	1.38925e-06
ENSMUSG00000112922.1	Gm47572	-2.78687	0.983439	4.8538e-08	1.41244e-06
ENSMUSG00000054034.10	Tceal5	-3.25301	1.10852	5.04783e-08	1.4649e-06
ENSMUSG00000033054.7	Npat	-2.13161	2.20656	5.09893e-08	1.47805e-06
ENSMUSG00000073889.10	Il11ra1	-2.48621	0.413168	5.20152e-08	1.50523e-06
ENSMUSG00000116664.1	Gm18549	-3.19479	0.77115	5.23697e-08	1.51377e-06
ENSMUSG00000080765.1	Gm8908	-3.33217	0.0902963	5.25799e-08	1.51813e-06
ENSMUSG00000115604.1	Gm7691	-3.50079	1.00307	5.31994e-08	1.53168e-06
ENSMUSG00000020077.14	Srgn	-2.43145	0.641325	5.44249e-08	1.55993e-06
ENSMUSG00000084246.1	Gm15162	-3.27293	0.586441	5.47057e-08	1.56709e-06
ENSMUSG00000054455.4	Vapb	-1.8137	1.56121	5.60647e-08	1.59974e-06
ENSMUSG00000111940.1	Gm4478	-3.00271	0.647003	5.65559e-08	1.61016e-06
ENSMUSG00000108155.1	Gm44443	-2.20631	2.21536	5.68636e-08	1.61711e-06
ENSMUSG00000113066.1	Gm47217	-3.92238	0.969086	5.7084e-08	1.62248e-06
ENSMUSG00000029291.11	Rufy3	-2.46302	4.59141	5.82693e-08	1.65432e-06
ENSMUSG00000004988.9	Fxyd4	-2.79392	1.51019	5.8676e-08	1.66309e-06
ENSMUSG00000071015.2	Gm136	-2.63531	1.23788	6.00858e-08	1.6974e-06
ENSMUSG00000113196.1	D230049E03Rik	-2.31798	1.42726	6.05579e-08	1.70979e-06
ENSMUSG00000105309.1	Gm21461	-3.17729	0.109816	6.15927e-08	1.73708e-06
ENSMUSG00000032846.10	Zswim6	-1.90135	7.45494	6.1678e-08	1.73853e-06
ENSMUSG00000007594.10	Hapln4	-1.80476	1.67369	6.21252e-08	1.7492e-06
ENSMUSG00000090397.1	Gm17096	-3.33929	0.532621	6.53181e-08	1.83002e-06
ENSMUSG00000114550.1	NA	-3.19494	0.181655	6.82654e-08	1.90736e-06
ENSMUSG00000093919.1	Gm20760	-2.96973	2.53437	6.98748e-08	1.947e-06
ENSMUSG00000002107.18	Celf2	-1.62794	4.08755	7.12727e-08	1.9827e-06
ENSMUSG00000111193.1	Gm35288	-2.52776	1.56971	7.26415e-08	2.01894e-06
ENSMUSG00000116858.1	Gm49797	-1.79662	2.06869	7.26546e-08	2.01894e-06
ENSMUSG00000009394.13	Syn2	-1.71737	2.50315	7.31236e-08	2.02866e-06
ENSMUSG00000038658.15	Ric1	-1.81417	2.16984	7.3478e-08	2.03739e-06
ENSMUSG00000097224.1	Gm26716	-3.08506	0.278937	7.4414e-08	2.05998e-06
ENSMUSG00000039375.16	Wdr17	-1.71729	1.42759	7.71361e-08	2.12957e-06
ENSMUSG00000063830.5	Gm6065	-3.49402	1.31009	7.8246e-08	2.15787e-06
ENSMUSG00000102516.1	Gm38340	-2.33824	2.67911	7.86115e-08	2.16561e-06
ENSMUSG00000052298.12	Cdc42se2	-2.12844	1.8425	7.94173e-08	2.18428e-06
ENSMUSG00000086372.1	Gm16246	-3.15203	1.35203	7.9911e-08	2.19549e-06
ENSMUSG00000036144.6	Meox2	-2.13101	0.758793	8.00845e-08	2.19789e-06
ENSMUSG00000071984.10	Fndc1	-1.48136	2.03621	8.16023e-08	2.23834e-06
ENSMUSG00000083713.1	Gm5883	-3.58233	0.753946	8.26161e-08	2.26493e-06
ENSMUSG00000112575.1	Gm31849	-3.68199	2.02183	8.28138e-08	2.26792e-06
ENSMUSG00000028020.16	Glrb	-2.10825	1.72349	8.32027e-08	2.27369e-06
ENSMUSG00000103713.1	Gm2136	-2.40481	0.305656	8.3378e-08	2.27604e-06
ENSMUSG00000014592.20	Camta1	-1.5298	2.50594	9.39515e-08	2.54292e-06
ENSMUSG00000117420.1	Gm50025	-2.97736	-0.0200631	9.9265e-08	2.68247e-06
ENSMUSG00000078773.11	Rad54b	-2.13054	0.602033	1.00916e-07	2.72277e-06
ENSMUSG00000017466.9	Timp2	-1.8711	1.25099	1.00813e-07	2.72277e-06
ENSMUSG00000102721.1	A630081D01Rik	-2.1655	0.219952	1.0226e-07	2.75029e-06
ENSMUSG00000057116.5	AF366264	-1.9014	0.971859	1.02811e-07	2.76367e-06
ENSMUSG00000041058.15	Wwp1	-1.67483	1.7283	1.0886e-07	2.91857e-06
ENSMUSG00000090097.8	Olfr1182	-2.43766	0.717146	1.08931e-07	2.91896e-06
ENSMUSG00000100017.2	2410022M11Rik	-2.45514	0.794283	1.10529e-07	2.95403e-06
ENSMUSG00000030842.12	Lamtor1	-2.15181	1.6705	1.11204e-07	2.96894e-06
ENSMUSG00000047143.3	Dmrta2	-1.68891	1.89564	1.11601e-07	2.978e-06
ENSMUSG00000037625.7	Cldn11	-2.39182	0.896662	1.13756e-07	3.03074e-06
ENSMUSG00000052508.10	Olfr536	-2.2226	0.601327	1.14223e-07	3.0416e-06
ENSMUSG00000113255.1	Tes3-ps	-2.5805	2.62692	1.14778e-07	3.05319e-06
ENSMUSG00000043794.8	D830025C05Rik	-2.38338	2.78762	1.15055e-07	3.05898e-06
ENSMUSG00000076910.1	Traj19	-4.16043	1.67937	1.16779e-07	3.10157e-06
ENSMUSG00000074946.5	Olfr1313	-2.4394	0.485879	1.17389e-07	3.11614e-06
ENSMUSG00000112061.1	Gm8249	-2.91499	-0.155603	1.18605e-07	3.14516e-06
ENSMUSG00000022525.13	Plaat1	-3.01333	2.79033	1.24111e-07	3.28093e-06
ENSMUSG00000102786.1	Gm38252	-2.33449	1.55279	1.24388e-07	3.28655e-06
ENSMUSG00000032062.2	2310030G06Rik	-2.88438	1.61416	1.24631e-07	3.29128e-06
ENSMUSG00000036334.12	Igsf10	-2.18631	2.90779	1.31369e-07	3.46206e-06
ENSMUSG00000065820.1	NA	-2.89989	-0.133855	1.37205e-07	3.60839e-06
ENSMUSG00000020003.16	Pex7	-1.72542	1.89003	1.39229e-07	3.65974e-06
ENSMUSG00000066392.11	Nrxn3	-1.79109	3.90354	1.42037e-07	3.72781e-06
ENSMUSG00000078317.6	F8a	-2.31672	1.80865	1.45016e-07	3.80011e-06
ENSMUSG00000034724.18	Cnot6l	-1.76967	2.12638	1.46386e-07	3.83404e-06
ENSMUSG00000030101.15	Sumf1	-2.13871	0.381718	1.48173e-07	3.87489e-06
ENSMUSG00000111800.1	Gm31557	-2.59973	0.699881	1.58989e-07	4.14288e-06
ENSMUSG00000023236.7	Scg5	-2.93555	1.53914	1.59286e-07	4.1485e-06
ENSMUSG00000098912.7	1500004A13Rik	-2.21259	2.48822	1.59785e-07	4.15514e-06
ENSMUSG00000116237.1	Gm30339	-2.56873	1.52015	1.61871e-07	4.2051e-06
ENSMUSG00000024146.9	Cript	-2.67535	1.65184	1.6222e-07	4.21202e-06
ENSMUSG00000031754.10	Nudt21	-2.29948	2.39005	1.62904e-07	4.22549e-06
ENSMUSG00000057897.14	Camk2b	-1.80737	3.47101	1.63365e-07	4.2353e-06
ENSMUSG00000070552.2	Mrgprx1	-3.33803	0.485198	1.63576e-07	4.2386e-06
ENSMUSG00000049517.8	Rps23	-2.75247	2.01329	1.65598e-07	4.28664e-06
ENSMUSG00000065260.1	Gm23453	-2.81893	-0.0336411	1.68234e-07	4.34827e-06
ENSMUSG00000020170.4	Frs2	-1.88691	1.92731	1.68156e-07	4.34827e-06
ENSMUSG00000079481.11	Nhsl2	-1.59055	2.35752	1.69523e-07	4.37938e-06
ENSMUSG00000028999.15	Rint1	-2.01693	2.25751	1.69654e-07	4.38055e-06
ENSMUSG00000113983.1	Gm47742	-3.36642	0.966081	1.71631e-07	4.42487e-06
ENSMUSG00000039943.16	Plcb4	-1.52732	2.6223	1.71949e-07	4.43082e-06
ENSMUSG00000068506.3	Gm5800	-2.70172	0.315033	1.75602e-07	4.51584e-06
ENSMUSG00000078546.8	Zfp995	-3.1533	2.54821	1.77132e-07	4.5529e-06
ENSMUSG00000104687.1	Gm42899	-2.16318	1.39172	1.81127e-07	4.64624e-06
ENSMUSG00000063623.3	C230062I16Rik	-2.23244	1.7111	1.81535e-07	4.65436e-06
ENSMUSG00000088653.1	Gm24851	-3.17301	1.36926	1.82156e-07	4.66793e-06
ENSMUSG00000110198.1	Gm45335	-2.71677	0.623482	1.82711e-07	4.6798e-06
ENSMUSG00000051354.14	Samd3	-2.08096	1.11149	1.87271e-07	4.77982e-06
ENSMUSG00000108694.1	Gm7287	-3.33144	1.39364	1.91112e-07	4.86084e-06
ENSMUSG00000101901.1	Gm9230	-2.54765	0.1957	1.92377e-07	4.89057e-06
ENSMUSG00000022754.6	Tmem45a	-2.0546	0.226816	1.94299e-07	4.93451e-06
ENSMUSG00000083180.1	Gm15007	-3.1798	1.09528	1.97513e-07	5.00369e-06
ENSMUSG00000029405.16	G3bp2	-1.96288	3.1846	1.97851e-07	5.00692e-06
ENSMUSG00000111828.1	D830035M03Rik	-2.25719	1.54943	1.98718e-07	5.02425e-06
ENSMUSG00000115290.1	Gm19098	-2.65068	0.841539	1.98889e-07	5.02609e-06
ENSMUSG00000004285.12	Atp6v1f	-2.341	0.621367	2.01163e-07	5.07601e-06
ENSMUSG00000089717.2	Olfr275	-2.12605	1.20652	2.03597e-07	5.13488e-06
ENSMUSG00000117541.1	Gm50048	-2.64477	0.90565	2.03842e-07	5.136e-06
ENSMUSG00000024532.13	1700034E13Rik	-2.68614	0.343293	2.07184e-07	5.20479e-06
ENSMUSG00000093447.1	Gm5139	-3.11789	0.164146	2.1689e-07	5.42992e-06
ENSMUSG00000117534.1	Gm20161	-2.23929	1.11822	2.17305e-07	5.43388e-06
ENSMUSG00000001833.17	Septin7	-1.63165	2.85672	2.17368e-07	5.43388e-06
ENSMUSG00000019254.16	Ppp1r12c	-2.24098	1.66755	2.18408e-07	5.45721e-06
ENSMUSG00000020027.18	Socs2	-1.65702	2.90067	2.18605e-07	5.45945e-06
ENSMUSG00000050625.4	Ccdc121	-2.23678	0.587193	2.22233e-07	5.54464e-06
ENSMUSG00000104580.1	Gm42620	-2.43249	0.43796	2.27066e-07	5.64866e-06
ENSMUSG00000069089.8	Cdk7	-2.03149	1.70552	2.36801e-07	5.87366e-06
ENSMUSG00000112630.1	Gm36908	-2.61259	0.315458	2.37676e-07	5.88964e-06
ENSMUSG00000036501.6	Fam13b	-2.18104	1.88892	2.3835e-07	5.90346e-06
ENSMUSG00000082741.2	Gm9703	-2.94923	1.04119	2.4457e-07	6.04872e-06
ENSMUSG00000026679.3	Enkur	-2.41817	0.737552	2.46581e-07	6.09256e-06
ENSMUSG00000049957.14	Ccdc137	-1.81701	1.09005	2.48414e-07	6.126e-06
ENSMUSG00000052026.7	Slc6a7	-1.99478	1.56734	2.49794e-07	6.15406e-06
ENSMUSG00000052631.15	Sh2d6	-2.47993	0.634459	2.53136e-07	6.22438e-06
ENSMUSG00000037257.8	Aagab	-2.04044	1.7246	2.53076e-07	6.22438e-06
ENSMUSG00000114811.1	Vmn1r-ps133	-2.71252	-0.216468	2.59275e-07	6.36002e-06
ENSMUSG00000104814.1	Gm42979	-2.06266	1.02567	2.60843e-07	6.38928e-06
ENSMUSG00000021264.12	Yy1	-1.70201	1.69873	2.70156e-07	6.60472e-06
ENSMUSG00000096308.1	Gm14598	-3.53413	0.770745	2.72963e-07	6.66697e-06
ENSMUSG00000069729.14	Arid1b	-1.55163	2.57289	2.80911e-07	6.84145e-06
ENSMUSG00000095633.2	Igkv4-58	-2.77483	-0.139891	2.82042e-07	6.86387e-06
ENSMUSG00000113037.1	Gm36550	-2.86621	0.0684798	2.8453e-07	6.91309e-06
ENSMUSG00000057179.6	Olfr747	-3.00442	0.751801	2.90408e-07	7.03915e-06
ENSMUSG00000105646.1	Gm30211	-2.29629	1.56888	2.90277e-07	7.03915e-06
ENSMUSG00000006678.6	Pola1	-1.68927	1.47528	2.91076e-07	7.04947e-06
ENSMUSG00000109675.2	Nxpe1-ps	-2.41503	0.648519	2.92782e-07	7.08325e-06
ENSMUSG00000086458.1	Gm2639	-2.335	-0.0756569	3.01149e-07	7.26844e-06
ENSMUSG00000058488.7	Kl	-2.00816	2.57466	3.01808e-07	7.2809e-06
ENSMUSG00000038214.15	Bend3	-1.66395	1.23512	3.10807e-07	7.46976e-06
ENSMUSG00000003344.14	Btbd2	-1.69185	0.615698	3.15154e-07	7.54934e-06
ENSMUSG00000035781.14	R3hdm4	-1.53891	1.52296	3.18911e-07	7.63219e-06
ENSMUSG00000042726.14	Trafd1	-1.89912	0.928432	3.2928e-07	7.86928e-06
ENSMUSG00000031722.10	Hp	-2.49248	0.712277	3.33008e-07	7.95463e-06
ENSMUSG00000079679.3	Vwde	-2.06007	2.14345	3.37382e-07	8.02906e-06
ENSMUSG00000080625.1	NA	-3.03863	-0.0316269	3.45865e-07	8.20036e-06
ENSMUSG00000095594.1	NA	-3.00659	0.0856971	3.4888e-07	8.26033e-06
ENSMUSG00000084142.1	Gm9103	-2.47833	-0.0161169	3.58732e-07	8.47787e-06
ENSMUSG00000101519.1	Ska2l-ps	-2.93163	0.0782475	3.70767e-07	8.72996e-06
ENSMUSG00000083993.1	Gm14398	-2.33152	0.167887	3.75118e-07	8.82427e-06
ENSMUSG00000045624.15	Esf1	-1.87269	2.21812	3.76265e-07	8.84286e-06
ENSMUSG00000064325.4	Hhip	-2.15171	2.77011	3.78952e-07	8.89806e-06
ENSMUSG00000008333.12	Snrpb2	-2.08266	0.916185	4.07324e-07	9.5074e-06
ENSMUSG00000018427.7	Ypel2	-1.85447	1.4898	4.22352e-07	9.82671e-06
ENSMUSG00000024298.15	Zfp871	-2.12422	2.91118	4.22664e-07	9.82949e-06
ENSMUSG00000033943.15	Mga	-1.80373	3.3507	4.26797e-07	9.91205e-06
ENSMUSG00000028145.9	Them4	-2.36267	2.08314	4.35548e-07	1.00923e-05
ENSMUSG00000022255.16	Mtdh	-1.4795	5.98846	4.38402e-07	1.01539e-05
ENSMUSG00000057880.12	Abat	-1.82603	3.31935	4.4412e-07	1.0277e-05
ENSMUSG00000013584.5	Aldh1a2	-2.2623	1.72166	4.49578e-07	1.03938e-05
ENSMUSG00000022895.16	Ets2	-1.73218	1.3691	4.76587e-07	1.09488e-05
ENSMUSG00000009376.15	Met	-1.98265	2.98077	4.77884e-07	1.09688e-05
ENSMUSG00000085334.7	Gm12940	-1.73226	0.858975	4.83106e-07	1.10737e-05
ENSMUSG00000031824.15	6430548M08Rik	-1.76957	1.98055	4.85991e-07	1.11286e-05
ENSMUSG00000061601.15	Pclo	-1.63959	3.49018	4.9413e-07	1.12858e-05
ENSMUSG00000042426.6	Dhx29	-2.13954	2.98122	5.00586e-07	1.14078e-05
ENSMUSG00000101451.1	Gm29430	-1.66986	0.0379514	5.07842e-07	1.1568e-05
ENSMUSG00000089473.1	Gm25369	-3.00994	-0.0954451	5.09963e-07	1.16111e-05
ENSMUSG00000043962.16	Thrap3	-1.57499	1.51037	5.17767e-07	1.17678e-05
ENSMUSG00000028255.6	Clca1	-2.03753	1.03508	5.20369e-07	1.18164e-05
ENSMUSG00000113561.1	Gm19176	-2.8522	1.77402	5.27607e-07	1.19754e-05
ENSMUSG00000062987.6	Olfr715b	-2.8039	1.42187	5.30332e-07	1.20213e-05
ENSMUSG00000027947.11	Il6ra	-1.58879	2.0277	5.31363e-07	1.20339e-05
ENSMUSG00000026959.13	Grin1	-1.66608	2.7152	5.36098e-07	1.2125e-05
ENSMUSG00000098103.1	Gm27005	-2.7958	0.191937	5.43434e-07	1.22855e-05
ENSMUSG00000031075.18	Ano1	-2.07413	2.94656	5.4727e-07	1.23613e-05
ENSMUSG00000035674.13	Ndufa3	-2.51129	0.885104	5.5046e-07	1.24278e-05
ENSMUSG00000102109.1	Gm29563	-2.61551	-0.0202896	5.51459e-07	1.24449e-05
ENSMUSG00000082486.1	Gm11919	-2.86547	0.698162	5.54719e-07	1.24964e-05
ENSMUSG00000081217.1	Gm15268	-2.60279	0.115572	5.55642e-07	1.25097e-05
ENSMUSG00000113075.1	Rpl7a-ps1	-3.08862	1.36732	5.83309e-07	1.3054e-05
ENSMUSG00000053950.10	Adnp2	-1.91003	1.02174	5.89393e-07	1.31786e-05
ENSMUSG00000020015.10	Cdk17	-1.97119	2.5886	5.97929e-07	1.33519e-05
ENSMUSG00000089735.1	Gm8428	-2.33332	0.264155	5.98612e-07	1.33613e-05
ENSMUSG00000024370.16	Cdc23	-1.74141	1.76364	6.17593e-07	1.37369e-05
ENSMUSG00000032470.17	Mras	-1.4747	1.07456	6.22654e-07	1.38435e-05
ENSMUSG00000026930.15	Gpsm1	-1.70425	1.36084	6.2876e-07	1.39549e-05
ENSMUSG00000030956.15	Fam53b	-2.14165	2.9716	6.38911e-07	1.41556e-05
ENSMUSG00000075701.9	Selenos	-2.41602	1.29198	6.43349e-07	1.42416e-05
ENSMUSG00000020961.15	Ston2	-1.61017	2.74687	6.47186e-07	1.43141e-05
ENSMUSG00000081196.1	Gm13858	-2.63538	0.755162	6.55364e-07	1.44699e-05
ENSMUSG00000029663.10	Gngt1	-1.81613	1.42548	6.58166e-07	1.45192e-05
ENSMUSG00000017817.11	Jph2	-1.35357	0.655257	6.61167e-07	1.45665e-05
ENSMUSG00000097171.1	Gm17644	-2.09279	1.18623	6.77216e-07	1.4888e-05
ENSMUSG00000092049.9	Vmn2r4	-2.48613	3.81851	6.94951e-07	1.52319e-05
ENSMUSG00000038518.15	Jarid2	-1.46547	2.01261	7.19831e-07	1.573e-05
ENSMUSG00000108363.1	Gm44615	-2.76837	0.116319	7.26127e-07	1.5854e-05
ENSMUSG00000102415.1	A430110C17Rik	-2.03642	2.13796	7.41564e-07	1.61634e-05
ENSMUSG00000087808.1	Gm23435	-2.71154	-0.175513	7.46722e-07	1.62689e-05
ENSMUSG00000006527.16	Sfmbt1	-1.5978	2.16803	7.48019e-07	1.62902e-05
ENSMUSG00000112230.1	Ifngas1	-2.53026	0.31536	7.60342e-07	1.65444e-05
ENSMUSG00000110788.1	Gm33700	-2.97069	0.861261	7.63105e-07	1.65975e-05
ENSMUSG00000051675.13	Trim32	-1.99574	0.955158	7.81436e-07	1.69672e-05
ENSMUSG00000031858.16	Mau2	-1.73067	2.20473	8.00202e-07	1.73452e-05
ENSMUSG00000103423.1	Gm5845	-2.66791	0.645128	8.23215e-07	1.77746e-05
ENSMUSG00000108157.1	Olrf445-ps1	-2.74453	-0.0911234	8.43622e-07	1.81706e-05
ENSMUSG00000007721.6	Ccdc124	-1.71314	0.442466	8.58468e-07	1.8467e-05
ENSMUSG00000051146.2	Camk2n2	-1.91236	0.420978	8.62317e-07	1.85333e-05
ENSMUSG00000018865.9	Sult4a1	-1.87046	1.25639	8.77282e-07	1.87925e-05
ENSMUSG00000019579.13	Mydgf	-1.43651	1.15403	8.89264e-07	1.90173e-05
ENSMUSG00000108930.1	Gm10648	-2.03345	0.802851	9.05246e-07	1.93348e-05
ENSMUSG00000035459.18	Stab2	-1.31292	2.22054	9.17872e-07	1.95881e-05
ENSMUSG00000090919.6	Pabpc4l	-1.9632	1.09985	9.25425e-07	1.97163e-05
ENSMUSG00000103902.1	Gm37501	-3.0139	1.43087	9.57324e-07	2.03449e-05
ENSMUSG00000113931.1	Gm5928	-2.72395	2.16837	9.69686e-07	2.05819e-05
ENSMUSG00000063919.11	Srrm4	-1.71737	2.54788	9.75626e-07	2.06994e-05
ENSMUSG00000022855.9	Senp2	-1.50112	1.95999	9.8187e-07	2.08232e-05
ENSMUSG00000037813.13	D630003M21Rik	-1.94779	1.79259	9.85778e-07	2.08887e-05
ENSMUSG00000037972.7	Snn	-1.87773	1.29192	9.8742e-07	2.09149e-05
ENSMUSG00000016257.15	Prelid3b	-1.91283	0.457274	1.00065e-06	2.116e-05
ENSMUSG00000103520.1	1110025M09Rik	-2.61788	0.953105	1.00778e-06	2.12844e-05
ENSMUSG00000050357.9	Carmil2	-1.53171	1.48584	1.01485e-06	2.13982e-05
ENSMUSG00000009030.14	Pdcl	-1.93245	1.10854	1.01682e-06	2.14219e-05
ENSMUSG00000115003.1	Gm48933	-1.47203	-0.0258649	1.03309e-06	2.1711e-05
ENSMUSG00000096839.7	Gm3629	-3.07525	0.341577	1.05043e-06	2.2009e-05
ENSMUSG00000085319.1	Gm13330	-2.83975	0.724736	1.04997e-06	2.2009e-05
ENSMUSG00000101587.2	Gm29036	-2.3155	0.0756038	1.05072e-06	2.2009e-05
ENSMUSG00000037072.15	Selenof	-2.02075	1.85315	1.07084e-06	2.2403e-05
ENSMUSG00000083989.2	Gm12607	-2.11832	0.946821	1.07388e-06	2.24573e-05
ENSMUSG00000116127.1	Gm8375	-2.37079	-0.0765105	1.07866e-06	2.25481e-05
ENSMUSG00000009563.16	Tor2a	-1.66876	0.983117	1.10597e-06	2.30905e-05
ENSMUSG00000018169.12	Mfng	-1.86147	1.63369	1.11628e-06	2.32773e-05
ENSMUSG00000114674.1	Gm19239	-3.70703	2.70178	1.11994e-06	2.3344e-05
ENSMUSG00000064333.2	Olfr926	-2.62408	-0.102634	1.13157e-06	2.35577e-05
ENSMUSG00000060601.13	Nr1h2	-1.76899	1.01226	1.13825e-06	2.36677e-05
ENSMUSG00000033735.9	Spr	-1.93143	1.04747	1.16023e-06	2.40953e-05
ENSMUSG00000018750.14	Zbtb4	-1.6138	1.76388	1.17857e-06	2.44562e-05
ENSMUSG00000064601.1	Gm25634	-3.00175	0.377766	1.19254e-06	2.47061e-05
ENSMUSG00000041737.8	Tmem45b	-1.86882	1.23681	1.20158e-06	2.48831e-05
ENSMUSG00000029050.15	Ski	-1.09871	1.07203	1.21269e-06	2.5093e-05
ENSMUSG00000112704.1	Gm46329	-2.61067	0.353271	1.22807e-06	2.53701e-05
ENSMUSG00000113985.1	9130015A21Rik	-3.26746	3.12027	1.23182e-06	2.54268e-05
ENSMUSG00000060730.8	Gm10086	-2.11881	0.486963	1.23256e-06	2.54318e-05
ENSMUSG00000091514.2	Gm17484	-2.14503	1.44193	1.2491e-06	2.57107e-05
ENSMUSG00000076911.1	Traj18	-3.58173	2.42153	1.25144e-06	2.57383e-05
ENSMUSG00000117134.1	Gm18521	-2.87799	0.0645162	1.25386e-06	2.57673e-05
ENSMUSG00000065389.1	Gm23100	-3.04497	0.663338	1.27366e-06	2.61225e-05
ENSMUSG00000084185.1	Rplp1-ps1	-2.33036	-0.0756447	1.27792e-06	2.61984e-05
ENSMUSG00000045962.16	Wnk1	-1.23918	2.94217	1.28117e-06	2.62438e-05
ENSMUSG00000034156.16	Tspoap1	-1.52679	1.53542	1.30025e-06	2.65815e-05
ENSMUSG00000113259.1	Gm35190	-2.72489	1.01942	1.30742e-06	2.66959e-05
ENSMUSG00000027533.10	Fabp5	-1.3128	0.982337	1.31896e-06	2.68885e-05
ENSMUSG00000070855.8	Olfr1116	-1.90292	1.43539	1.32149e-06	2.69295e-05
ENSMUSG00000054944.7	5330416C01Rik	-1.89613	0.737945	1.34583e-06	2.73598e-05
ENSMUSG00000041670.16	Rims1	-2.12948	0.114602	1.36073e-06	2.76408e-05
ENSMUSG00000106076.1	Gm43840	-3.08138	0.877366	1.36337e-06	2.76554e-05
ENSMUSG00000113105.1	Gm47371	-2.48159	-0.0978546	1.36362e-06	2.76554e-05
ENSMUSG00000082389.2	Mkrn1-ps1	-2.19164	0.171241	1.36545e-06	2.76815e-05
ENSMUSG00000054099.11	Slc25a40	-1.82205	1.70169	1.36749e-06	2.77118e-05
ENSMUSG00000021357.14	Exoc2	-1.4859	1.20482	1.37822e-06	2.78962e-05
ENSMUSG00000056486.18	Chn1	-2.07548	4.54082	1.38348e-06	2.79694e-05
ENSMUSG00000079286.1	Gm11084	-2.35409	-0.311879	1.38812e-06	2.80359e-05
ENSMUSG00000026480.12	Ncf2	-1.67945	2.01469	1.38842e-06	2.80359e-05
ENSMUSG00000072437.3	Nanos1	-1.74525	1.02547	1.3942e-06	2.81415e-05
ENSMUSG00000032456.13	Nmnat3	-1.86832	1.49869	1.4164e-06	2.85444e-05
ENSMUSG00000034361.10	Cpne2	-1.78091	1.25869	1.43987e-06	2.89602e-05
ENSMUSG00000034634.7	Ly6d	-2.18149	-0.211542	1.45683e-06	2.92899e-05
ENSMUSG00000084891.1	Gm12958	-2.69009	-0.0232963	1.45844e-06	2.92991e-05
ENSMUSG00000030562.17	Nox4	-1.76064	1.90813	1.45835e-06	2.92991e-05
ENSMUSG00000103080.1	Gm38123	-2.18926	0.579524	1.46085e-06	2.9336e-05
ENSMUSG00000090117.7	Gm16541	-2.77048	1.4073	1.4644e-06	2.93841e-05
ENSMUSG00000111204.1	Gm47320	-2.08158	0.935339	1.47138e-06	2.9501e-05
ENSMUSG00000021361.7	Tmem14c	-2.13979	0.077532	1.51347e-06	3.02735e-05
ENSMUSG00000029169.11	Dhx15	-1.55021	1.9946	1.52766e-06	3.05095e-05
ENSMUSG00000022191.16	Drosha	-1.71001	1.56324	1.55924e-06	3.1116e-05
ENSMUSG00000108169.1	Gm43958	-2.38097	1.45256	1.60379e-06	3.193e-05
ENSMUSG00000082870.1	Gm12165	-2.43007	0.297946	1.61415e-06	3.20988e-05
ENSMUSG00000039098.3	Gm9767	-2.32715	1.15911	1.62021e-06	3.21816e-05
ENSMUSG00000036591.16	Arhgap21	-1.96696	3.5093	1.62605e-06	3.22726e-05
ENSMUSG00000105378.1	Gm42515	-2.2553	1.67183	1.64955e-06	3.27135e-05
ENSMUSG00000019977.16	Hbs1l	-1.69338	1.1264	1.65123e-06	3.2734e-05
ENSMUSG00000115062.1	4930544F09Rik	-2.44636	1.16006	1.65503e-06	3.27585e-05
ENSMUSG00000018363.16	Smurf2	-1.83783	2.71742	1.71721e-06	3.38319e-05
ENSMUSG00000007877.2	Tcap	-2.13557	2.2294	1.742e-06	3.42675e-05
ENSMUSG00000034813.17	Grip1	-1.41995	2.20651	1.8048e-06	3.54073e-05
ENSMUSG00000042258.13	Isl1	-1.69718	1.14208	1.83402e-06	3.58702e-05
ENSMUSG00000048000.15	Gigyf2	-1.56887	2.91049	1.87537e-06	3.65949e-05
ENSMUSG00000110495.1	Gm45879	-2.22003	-0.299402	1.87688e-06	3.65963e-05
ENSMUSG00000080298.2	Gm14807	-2.92775	1.26816	1.89208e-06	3.68785e-05
ENSMUSG00000083328.3	Gm11826	-2.46188	1.41246	1.89596e-06	3.69401e-05
ENSMUSG00000003824.12	Syce2	-1.85894	0.246462	1.9055e-06	3.7074e-05
ENSMUSG00000105410.1	Gtpbp4-ps7	-2.37004	-0.204996	1.92108e-06	3.73156e-05
ENSMUSG00000107440.1	Gm40377	-2.45822	1.32921	1.95082e-06	3.78446e-05
ENSMUSG00000027375.14	Mal	-1.94059	0.678164	1.95128e-06	3.78446e-05
ENSMUSG00000083347.1	Gm13913	-2.25918	-0.245821	1.96783e-06	3.81076e-05
ENSMUSG00000035189.16	Ano4	-1.54171	1.96819	1.97076e-06	3.81499e-05
ENSMUSG00000075702.9	Selenom	-1.96119	0.232623	1.99453e-06	3.85808e-05
ENSMUSG00000042182.16	Bend6	-1.97646	1.89839	2.01694e-06	3.89701e-05
ENSMUSG00000106433.1	Gm32102	-2.87703	1.07383	2.03702e-06	3.93431e-05
ENSMUSG00000096211.1	NA	-2.93226	0.914405	2.07594e-06	3.9989e-05
ENSMUSG00000109956.1	Gm45428	-1.87275	0.493403	2.0788e-06	4.00289e-05
ENSMUSG00000029377.5	Ereg	-1.90103	0.910855	2.09091e-06	4.0247e-05
ENSMUSG00000025260.10	Hsd17b10	-1.85771	-0.125789	2.10712e-06	4.04825e-05
ENSMUSG00000028514.15	Usp24	-1.44516	2.23832	2.11327e-06	4.05853e-05
ENSMUSG00000033967.4	Rnf225	-1.88974	1.40425	2.13178e-06	4.08947e-05
ENSMUSG00000044349.15	Snhg11	-1.93102	4.299	2.13624e-06	4.09495e-05
ENSMUSG00000106492.1	Gm29707	-1.94943	0.514172	2.15456e-06	4.12697e-05
ENSMUSG00000025626.16	Phf6	-1.84552	1.29708	2.1695e-06	4.15402e-05
ENSMUSG00000111489.1	1700019J19Rik	-2.30747	1.75898	2.17479e-06	4.15975e-05
ENSMUSG00000070319.6	Eif3g	-1.75317	0.618627	2.17493e-06	4.15975e-05
ENSMUSG00000074292.4	Gm10660	-2.7683	1.95604	2.1912e-06	4.18773e-05
ENSMUSG00000115969.1	Gm46519	-1.76386	0.710711	2.22558e-06	4.24707e-05
ENSMUSG00000095241.2	Gm5478	-2.23579	0.614439	2.24371e-06	4.27687e-05
ENSMUSG00000112015.1	Gm47592	-2.60663	1.4364	2.25588e-06	4.29846e-05
ENSMUSG00000028883.17	Sema3a	-1.73185	2.89452	2.25892e-06	4.30266e-05
ENSMUSG00000024695.15	Zfp91	-1.82646	4.65636	2.27614e-06	4.33384e-05
ENSMUSG00000103509.1	Gm38372	-2.33151	0.727027	2.32763e-06	4.42693e-05
ENSMUSG00000098160.3	Gm26974	-2.31305	0.915183	2.36945e-06	4.49807e-05
ENSMUSG00000103341.1	1700051O22Rik	-2.0164	-0.0216242	2.41092e-06	4.57001e-05
ENSMUSG00000027438.14	Napb	-1.83244	3.92734	2.42836e-06	4.59452e-05
ENSMUSG00000097343.2	9030407P20Rik	-1.88817	0.280557	2.44025e-06	4.61019e-05
ENSMUSG00000063660.4	Olfr98	-2.88431	0.593236	2.44976e-06	4.62303e-05
ENSMUSG00000111324.1	Gm31410	-1.61487	0.276801	2.45561e-06	4.62722e-05
ENSMUSG00000116796.1	Gm49784	-1.60981	0.0542223	2.46702e-06	4.64702e-05
ENSMUSG00000096740.8	Lbhd1	-2.71161	1.55386	2.4895e-06	4.68103e-05
ENSMUSG00000086711.1	Gm15482	-1.84825	0.532078	2.52072e-06	4.73245e-05
ENSMUSG00000116995.1	Gm21926	-2.24807	1.10866	2.53665e-06	4.7571e-05
ENSMUSG00000079323.9	Gm20661	-2.5397	0.742072	2.55011e-06	4.78055e-05
ENSMUSG00000045689.3	Pcdhb4	-1.94911	0.174446	2.55103e-06	4.78055e-05
ENSMUSG00000036298.10	Slc2a13	-1.48663	1.70968	2.55338e-06	4.7832e-05
ENSMUSG00000025887.10	Casp12	-1.9778	1.60054	2.55935e-06	4.79263e-05
ENSMUSG00000014668.15	Chfr	-1.60805	1.28846	2.58459e-06	4.8328e-05
ENSMUSG00000020364.14	Zfp354a	-2.2603	2.02593	2.58667e-06	4.83492e-05
ENSMUSG00000108693.1	Gm45153	-2.24885	0.743068	2.59747e-06	4.85155e-05
ENSMUSG00000090112.8	Shprh	-1.49343	2.1437	2.59713e-06	4.85155e-05
ENSMUSG00000086118.1	Gm14169	-1.6177	0.677684	2.59865e-06	4.85198e-05
ENSMUSG00000103415.1	Gm37339	-2.76661	0.383372	2.61787e-06	4.8843e-05
ENSMUSG00000028106.13	Rprd2	-1.40135	1.71316	2.61908e-06	4.88477e-05
ENSMUSG00000022508.5	Bcl6	-1.54592	2.12084	2.62693e-06	4.89464e-05
ENSMUSG00000024816.12	Frmd8	-1.64497	1.65557	2.6394e-06	4.91011e-05
ENSMUSG00000071074.9	Yipf3	-2.1707	1.27463	2.64803e-06	4.92078e-05
ENSMUSG00000030213.12	Atf7ip	-1.29265	2.69856	2.65359e-06	4.92933e-05
ENSMUSG00000114911.1	Gm17878	-2.40265	0.110717	2.67868e-06	4.97231e-05
ENSMUSG00000113027.1	Gm7040	-2.96737	1.03701	2.7464e-06	5.08139e-05
ENSMUSG00000106358.1	Gm7047	-2.6423	0.91078	2.79462e-06	5.16311e-05
ENSMUSG00000033082.10	Clec1a	-1.85427	1.44325	2.81413e-06	5.1954e-05
ENSMUSG00000085116.1	Gm2735	-2.65493	0.217869	2.85125e-06	5.25823e-05
ENSMUSG00000081560.1	Gm9218	-2.43295	1.84974	2.87598e-06	5.3e-05
ENSMUSG00000044876.15	Zfp444	-1.21526	1.65746	2.89449e-06	5.33026e-05
ENSMUSG00000102909.1	Gm2453	-2.27486	-0.00180774	2.92726e-06	5.38673e-05
ENSMUSG00000062470.10	Fbxl12os	-1.80063	1.01825	3.02096e-06	5.54316e-05
ENSMUSG00000026676.7	Ccdc3	-1.84915	0.832586	3.02679e-06	5.55187e-05
ENSMUSG00000032215.15	Rsl24d1	-1.76447	0.19006	3.057e-06	5.60125e-05
ENSMUSG00000022076.10	Klhl1	-1.84724	1.70466	3.06389e-06	5.61119e-05
ENSMUSG00000007739.10	Cct4	-1.72029	1.82708	3.06463e-06	5.61119e-05
ENSMUSG00000019437.17	Tlcd1	-1.19458	0.680292	3.10109e-06	5.67591e-05
ENSMUSG00000085314.1	Gm14866	-1.98114	0.178088	3.10538e-06	5.68172e-05
ENSMUSG00000110080.1	Gm6145	-1.59906	0.962616	3.11753e-06	5.69783e-05
ENSMUSG00000085361.2	Gm16305	-2.62419	1.01835	3.12936e-06	5.7174e-05
ENSMUSG00000117002.1	Gm32892	-2.51508	0.443328	3.14404e-06	5.74012e-05
ENSMUSG00000028137.9	Celf3	-1.68421	0.732924	3.18082e-06	5.80311e-05
ENSMUSG00000029120.10	Ppp2r2c	-1.66595	1.71552	3.20106e-06	5.83588e-05
ENSMUSG00000020799.16	Tekt1	-2.01049	0.404846	3.2152e-06	5.85539e-05
ENSMUSG00000026207.16	Speg	-1.33739	2.68956	3.27119e-06	5.94462e-05
ENSMUSG00000102408.1	4930568G15Rik	-2.05972	1.99895	3.33865e-06	6.04999e-05
ENSMUSG00000065851.1	NA	-2.90041	0.710858	3.34031e-06	6.05085e-05
ENSMUSG00000029630.15	Cyp3a25	-1.86779	0.0174675	3.35018e-06	6.06657e-05
ENSMUSG00000040596.15	Pogk	-1.35284	1.3293	3.36566e-06	6.09027e-05
ENSMUSG00000100837.7	1700063D05Rik	-2.29866	0.925138	3.41041e-06	6.1647e-05
ENSMUSG00000036086.16	Zranb3	-1.71396	2.13785	3.45521e-06	6.23685e-05
ENSMUSG00000056014.15	A430033K04Rik	-2.04257	1.91485	3.466e-06	6.25411e-05
ENSMUSG00000111730.1	Gm5950	-2.20599	0.0407505	3.57132e-06	6.42145e-05
ENSMUSG00000085545.1	Gm13553	-2.04781	-0.050973	3.67171e-06	6.58341e-05
ENSMUSG00000013033.16	Adgrl1	-1.66349	2.80558	3.76051e-06	6.72609e-05
ENSMUSG00000103410.1	Gm37341	-2.11002	-0.250101	3.77196e-06	6.74421e-05
ENSMUSG00000053702.16	Nebl	-1.68701	2.71532	3.80676e-06	6.79929e-05
ENSMUSG00000026100.6	Mstn	-1.52595	0.00553779	3.82525e-06	6.82277e-05
ENSMUSG00000050199.13	Lgr4	-1.60339	1.32624	3.85839e-06	6.87948e-05
ENSMUSG00000039901.9	Armh3	-1.62533	1.25451	3.97551e-06	7.06854e-05
ENSMUSG00000099400.1	Kat6b-ps1	-2.03508	1.02864	4.04961e-06	7.18529e-05
ENSMUSG00000086016.1	1700084C06Rik	-2.0789	1.40709	4.07974e-06	7.23166e-05
ENSMUSG00000042063.11	Zfp386	-2.01212	2.53777	4.08e-06	7.23166e-05
ENSMUSG00000029030.14	Tprgl	-1.42365	1.74877	4.08973e-06	7.24135e-05
ENSMUSG00000003346.14	Abhd17a	-2.16138	1.97874	4.11217e-06	7.27353e-05
ENSMUSG00000053470.13	Kdm3a	-1.46803	1.85192	4.11135e-06	7.27353e-05
ENSMUSG00000085511.1	Gm11738	-1.66186	-0.0026453	4.12086e-06	7.28637e-05
ENSMUSG00000025059.16	Gk	-1.62923	1.78527	4.1478e-06	7.32133e-05
ENSMUSG00000071362.2	Gm10330	-2.97032	0.393658	4.14943e-06	7.32168e-05
ENSMUSG00000034656.17	Cacna1a	-1.26958	2.85716	4.17029e-06	7.34831e-05
ENSMUSG00000064718.1	NA	-2.37834	0.362506	4.25705e-06	7.48569e-05
ENSMUSG00000113682.1	Gm48630	-1.87902	-0.0560894	4.35381e-06	7.63951e-05
ENSMUSG00000080968.3	Atf1-ps	-2.17217	-0.185903	4.41865e-06	7.7485e-05
ENSMUSG00000041560.12	Nop53	-1.63696	1.28082	4.48533e-06	7.84925e-05
ENSMUSG00000017412.15	Cacnb4	-1.55273	4.77138	4.52488e-06	7.91032e-05
ENSMUSG00000044042.18	Fmn1	-1.4544	1.97772	4.54415e-06	7.93362e-05
ENSMUSG00000098073.1	Gm8048	-2.35659	-0.0246399	4.61818e-06	8.05137e-05
ENSMUSG00000049573.3	Olfr780	-1.91939	0.277499	4.63396e-06	8.07492e-05
ENSMUSG00000035790.15	Cep19	-2.5935	2.71996	4.64335e-06	8.08697e-05
ENSMUSG00000077706.1	NA	-1.70013	-0.370014	4.64921e-06	8.09441e-05
ENSMUSG00000042940.8	9230106D20Rik	-1.62599	0.229696	4.65409e-06	8.10014e-05
ENSMUSG00000049152.11	Ugt3a2	-2.17016	0.637221	4.67265e-06	8.12968e-05
ENSMUSG00000110826.1	Gm47262	-2.4342	-0.051975	4.67589e-06	8.13254e-05
ENSMUSG00000077171.1	Gm25761	-2.95001	1.3507	4.69159e-06	8.15707e-05
ENSMUSG00000113542.1	Gm19154	-2.30914	0.641375	4.70676e-06	8.17788e-05
ENSMUSG00000021986.8	Amer2	-1.23949	1.56343	4.74003e-06	8.22728e-05
ENSMUSG00000052934.14	Fbxo31	-1.53008	1.6091	4.75312e-06	8.24159e-05
ENSMUSG00000113064.1	Gm40394	-2.23618	-0.148439	4.88158e-06	8.43282e-05
ENSMUSG00000006538.12	Ihh	-1.38433	0.855977	4.89692e-06	8.4536e-05
ENSMUSG00000046818.7	Ddit4l	-1.68523	0.829863	4.90292e-06	8.4611e-05
ENSMUSG00000115277.1	Gm19016	-2.33177	2.01195	5.01376e-06	8.63753e-05
ENSMUSG00000024790.7	Sac3d1	-1.4496	0.378123	5.02022e-06	8.64272e-05
ENSMUSG00000083662.1	Gm12152	-2.76358	1.92368	5.04484e-06	8.66793e-05
ENSMUSG00000015085.8	Entpd2	-2.05771	0.225019	5.06216e-06	8.69183e-05
ENSMUSG00000005846.12	Rsl1d1	-1.77416	1.55892	5.07588e-06	8.70952e-05
ENSMUSG00000035150.15	Eif2s3x	-1.73899	0.798207	5.07963e-06	8.71304e-05
ENSMUSG00000089287.1	Gm22944	-2.65377	0.327994	5.0962e-06	8.73853e-05
ENSMUSG00000031015.8	Swap70	-1.70731	2.01776	5.10984e-06	8.75897e-05
ENSMUSG00000036893.17	Ehmt1	-1.78323	2.81582	5.1842e-06	8.88046e-05
ENSMUSG00000090083.11	Rnf8	-1.31859	1.88624	5.19416e-06	8.89455e-05
ENSMUSG00000019868.16	Vta1	-1.87965	0.716689	5.31913e-06	9.09329e-05
ENSMUSG00000086442.1	Gm11722	-2.28663	0.114906	5.33147e-06	9.11133e-05
ENSMUSG00000108586.1	Gm44976	-3.29913	1.29101	5.33349e-06	9.11173e-05
ENSMUSG00000039133.8	9330171B17Rik	-1.62283	1.36315	5.35069e-06	9.13195e-05
ENSMUSG00000023010.15	Tmbim6	-1.36369	1.38095	5.39512e-06	9.19549e-05
ENSMUSG00000109605.1	Gm45303	-2.03102	0.277088	5.41973e-06	9.23126e-05
ENSMUSG00000097016.2	Gm26708	-2.14737	0.761794	5.42634e-06	9.23635e-05
ENSMUSG00000095992.2	Krtap22-2	-3.06032	0.403025	5.44394e-06	9.26323e-05
ENSMUSG00000081648.1	Gm13423	-1.54382	1.40805	5.45809e-06	9.28111e-05
ENSMUSG00000073139.9	Tmem185a	-1.9988	0.917049	5.54748e-06	9.41743e-05
ENSMUSG00000032890.17	Rims3	-1.41954	1.60504	5.63982e-06	9.53973e-05
ENSMUSG00000029283.17	Cdc7	-1.43648	0.613041	5.83109e-06	9.83023e-05
ENSMUSG00000009216.7	Fam163b	-1.73994	0.0721724	5.84644e-06	9.84962e-05
ENSMUSG00000022184.8	Fbxo4	-1.4597	0.76533	5.84952e-06	9.85155e-05
ENSMUSG00000067513.1	Olfr1436	-2.34032	-0.213895	5.87505e-06	9.89128e-05
ENSMUSG00000087585.1	Gm14100	-2.4002	0.351461	5.92865e-06	9.96859e-05
ENSMUSG00000021114.9	Atp6v1d	-1.8036	2.86303	5.93727e-06	9.97958e-05
ENSMUSG00000039844.19	Rapgef1	-1.42471	1.69756	5.95305e-06	0.000100028
ENSMUSG00000112006.1	Gm48633	-2.11688	-0.0776094	5.9765e-06	0.000100356
ENSMUSG00000026514.14	Cnih3	-1.62716	1.72344	5.99101e-06	0.000100567
ENSMUSG00000107313.1	Gm43332	-2.24542	1.24279	6.03845e-06	0.000101263
ENSMUSG00000117564.1	Gm41638	-2.32786	-0.254614	6.05385e-06	0.000101455
ENSMUSG00000104377.1	Gm37515	-2.21149	1.8929	6.09667e-06	0.000102072
ENSMUSG00000032308.9	Ulk3	-1.40585	0.434344	6.23313e-06	0.000104015
ENSMUSG00000089793.1	Gm16112	-2.06252	-0.222289	6.24251e-06	0.000104138
ENSMUSG00000053889.5	Kirrel3os	-1.46966	0.192324	6.25004e-06	0.000104229
ENSMUSG00000108134.1	Gm9560	-2.36351	0.727449	6.25975e-06	0.000104357
ENSMUSG00000081405.1	Gm13142	-2.42588	0.106302	6.45827e-06	0.000107386
ENSMUSG00000107045.1	Gm43636	-1.62288	0.884685	6.47331e-06	0.000107601
ENSMUSG00000015053.14	Gata2	-1.26822	1.71436	6.52209e-06	0.000108341
ENSMUSG00000029878.6	Dbpht2	-1.44456	1.58892	6.54247e-06	0.000108632
ENSMUSG00000071661.6	Zbtb3	-1.79431	-0.141488	6.55868e-06	0.000108843
ENSMUSG00000034538.8	Zfp418	-1.5228	1.14876	6.57445e-06	0.000109069
ENSMUSG00000025139.14	Tollip	-1.51188	0.803764	6.59952e-06	0.000109414
ENSMUSG00000103434.1	Gm36993	-2.19137	1.60755	6.6596e-06	0.000110338
ENSMUSG00000075590.4	Nrbp2	-2.07712	1.77009	6.68485e-06	0.000110685
ENSMUSG00000112240.1	Gm48310	-2.17026	-0.317987	6.69221e-06	0.000110747
ENSMUSG00000024972.16	Lgals12	-1.36408	0.122771	6.71311e-06	0.000111009
ENSMUSG00000103354.1	Gm38083	-1.83079	0.61981	6.74745e-06	0.000111396
ENSMUSG00000022016.16	Akap11	-1.78767	3.13534	6.74597e-06	0.000111396
ENSMUSG00000065344.1	Gm25581	-2.1825	-0.204278	6.89037e-06	0.000113389
ENSMUSG00000117419.1	Gm7930	-2.21839	-0.189149	6.91487e-06	0.000113646
ENSMUSG00000030365.11	Clec2i	-2.15476	0.76261	6.93379e-06	0.00011392
ENSMUSG00000105020.1	Gm7205	-2.24187	0.1983	6.9859e-06	0.000114695
ENSMUSG00000114090.1	Gm9472	-2.69324	1.98475	6.99024e-06	0.0001147
ENSMUSG00000022673.5	Mcm4	-1.48522	0.688461	6.99478e-06	0.000114737
ENSMUSG00000060187.4	Lrrc10	-1.85118	0.961542	7.02991e-06	0.000115092
ENSMUSG00000061780.6	Cfd	-2.03056	-0.0973373	7.20611e-06	0.000117599
ENSMUSG00000115106.1	Gm8043	-2.59307	0.66504	7.23683e-06	0.000118063
ENSMUSG00000031351.15	Zfp185	-1.53031	0.231701	7.24497e-06	0.000118158
ENSMUSG00000096375.2	Gm7094	-2.49776	0.871236	7.32357e-06	0.000119363
ENSMUSG00000079295.5	Klrb1-ps1	-1.75307	-0.264777	7.53565e-06	0.000122507
ENSMUSG00000082499.1	Gm13615	-2.29249	1.16497	7.55411e-06	0.000122768
ENSMUSG00000063904.3	Dpp3	-1.80141	0.651578	7.5572e-06	0.000122779
ENSMUSG00000069844.12	Sco1	-1.73514	1.23557	7.57289e-06	0.000122995
ENSMUSG00000061701.11	Fbxw20	-2.27629	1.6512	7.61948e-06	0.000123594
ENSMUSG00000106276.1	Gm9397	-2.28844	-0.0660665	7.64068e-06	0.000123899
ENSMUSG00000085603.3	Gm11346	-1.75063	1.82887	7.65239e-06	0.000124049
ENSMUSG00000057863.6	Rpl36	-2.01954	0.571293	7.66814e-06	0.000124238
ENSMUSG00000106648.1	Gm43176	-1.49319	0.852125	7.84337e-06	0.000126904
ENSMUSG00000094597.2	Gm4810	-1.77113	0.432261	7.9685e-06	0.000128643
ENSMUSG00000064574.1	NA	-2.22537	-0.242429	7.98068e-06	0.000128798
ENSMUSG00000032553.14	Srprb	-1.99185	0.461459	8.01522e-06	0.000129274
ENSMUSG00000087006.3	Gm13889	-1.49258	0.562954	8.08025e-06	0.000130159
ENSMUSG00000079197.10	Psme2	-1.63242	1.09035	8.15027e-06	0.000131204
ENSMUSG00000081640.1	Rplp0-ps1	-2.39566	0.86174	8.18784e-06	0.00013156
ENSMUSG00000022155.9	Mroh2b	-1.81041	2.41256	8.18528e-06	0.00013156
ENSMUSG00000039703.15	Nploc4	-1.33492	1.48788	8.18633e-06	0.00013156
ENSMUSG00000048126.16	Col6a3	-1.32404	2.44839	8.18597e-06	0.00013156
ENSMUSG00000101211.1	Gm28818	-2.02188	0.690173	8.42182e-06	0.000134894
ENSMUSG00000102600.1	Gm37266	-2.39264	1.84788	8.44086e-06	0.000135157
ENSMUSG00000034211.14	Mrps17	-1.47109	0.853721	8.49925e-06	0.000135921
ENSMUSG00000071649.5	B3gat3	-1.51078	0.143764	8.50385e-06	0.000135952
ENSMUSG00000019659.8	Ccdc12	-1.52045	1.50586	8.51308e-06	0.000136057
ENSMUSG00000059409.9	Ppp2r5d	-1.57577	0.753864	8.52149e-06	0.000136149
ENSMUSG00000073960.1	Olfr583	-2.7018	0.081762	8.55917e-06	0.000136666
ENSMUSG00000050876.9	Spata31d1a	-1.64061	1.15146	8.62944e-06	0.000137658
ENSMUSG00000039899.5	Fgl2	-2.03146	1.11803	8.6871e-06	0.000138492
ENSMUSG00000081796.1	Gm9005	-2.42923	0.585647	8.69731e-06	0.000138611
ENSMUSG00000029106.14	Add1	-1.47115	1.76958	8.70654e-06	0.000138672
ENSMUSG00000047155.13	Cyp4x1	-1.85927	1.80613	8.78372e-06	0.000139727
ENSMUSG00000096689.1	NA	-2.59831	0.195498	8.81553e-06	0.000140189
ENSMUSG00000113111.1	Gm7754	-1.9128	1.09184	8.88644e-06	0.000141185
ENSMUSG00000097370.2	4930467K11Rik	-2.11698	0.058863	8.89792e-06	0.000141323
ENSMUSG00000087371.1	Gm15541	-1.82446	2.45919	9.04887e-06	0.000143275
ENSMUSG00000057101.8	Zfp180	-1.87729	1.8526	9.09144e-06	0.000143701
ENSMUSG00000027925.2	Sprr2j-ps	-2.66691	0.487821	9.21259e-06	0.000145416
ENSMUSG00000066900.11	Suds3	-1.54471	2.01959	9.23068e-06	0.000145656
ENSMUSG00000028161.17	Ppp3ca	-1.83063	5.36803	9.3285e-06	0.000147064
ENSMUSG00000068747.14	Sort1	-1.57589	1.86799	9.43614e-06	0.00014844
ENSMUSG00000088677.1	NA	-3.08697	1.60549	9.4618e-06	0.00014866
ENSMUSG00000034486.8	Gbx2	-1.74132	1.01876	9.45926e-06	0.00014866
ENSMUSG00000024887.9	Asah2	-1.65121	1.25515	9.50119e-06	0.000149187
ENSMUSG00000087756.1	NA	-2.49126	0.0713306	9.70226e-06	0.000151924
ENSMUSG00000046280.9	She	-1.30556	1.6187	9.70081e-06	0.000151924
ENSMUSG00000100113.1	Gm28592	-1.6944	-0.173523	9.80467e-06	0.000153386
ENSMUSG00000109734.1	Gm45272	-2.23424	0.823691	9.80833e-06	0.000153396
ENSMUSG00000098469.1	Ranbp2-ps4	-2.13696	0.508407	9.83257e-06	0.000153681
ENSMUSG00000051251.3	Nhlh1	-1.60807	0.419254	9.89999e-06	0.00015464
ENSMUSG00000097722.1	NA	-1.49261	0.153674	9.92496e-06	0.000154936
ENSMUSG00000006575.14	Rundc3a	-1.69487	1.33064	9.94892e-06	0.000155215
ENSMUSG00000068823.10	Csde1	-1.4727	3.36647	1.00018e-05	0.000155849
ENSMUSG00000032026.7	Rexo2	-1.46101	0.469797	1.00015e-05	0.000155849
ENSMUSG00000073997.3	Olfr521	-1.57696	-0.240945	1.00072e-05	0.000155886
ENSMUSG00000048540.8	Nhlh2	-1.31985	1.06356	1.00549e-05	0.000156581
ENSMUSG00000055471.7	Alk	-1.26521	2.17668	1.00714e-05	0.00015679
ENSMUSG00000024694.9	Keg1	-1.45152	0.522104	1.00852e-05	0.000156908
ENSMUSG00000028391.16	Wdr31	-1.38929	1.47132	1.00882e-05	0.000156908
ENSMUSG00000003418.11	St8sia6	-1.42107	1.8171	1.01143e-05	0.000157267
ENSMUSG00000019464.6	Ptger1	-1.08766	0.806123	1.01414e-05	0.000157592
ENSMUSG00000009687.14	Fxyd5	-1.39196	0.845897	1.01613e-05	0.000157852
ENSMUSG00000115554.1	Gm19111	-1.85809	0.532748	1.01717e-05	0.000157967
ENSMUSG00000093595.1	Vmn1r-ps49	-2.06818	-0.16669	1.01829e-05	0.000158093
ENSMUSG00000023961.16	Enpp4	-1.22967	1.23903	1.02051e-05	0.000158389
ENSMUSG00000088971.1	NA	-2.08058	-0.370265	1.02473e-05	0.000158996
ENSMUSG00000061549.6	Olfr301	-2.1333	0.713279	1.03092e-05	0.000159908
ENSMUSG00000102206.5	Pcdha11	-1.09527	0.103147	1.03591e-05	0.000160632
ENSMUSG00000033526.16	Ppip5k1	-1.2862	2.70876	1.056e-05	0.0001635
ENSMUSG00000040621.14	Gemin8	-1.60384	0.528571	1.05652e-05	0.00016353
ENSMUSG00000032584.12	Mst1r	-1.4327	1.81874	1.06942e-05	0.000165426
ENSMUSG00000100551.1	Gm19503	-2.71761	1.33662	1.07122e-05	0.000165655
ENSMUSG00000112258.1	Gm10165	-1.96971	0.285719	1.08373e-05	0.000167285
ENSMUSG00000054200.6	Ffar4	-1.41853	0.401446	1.08362e-05	0.000167285
ENSMUSG00000034683.12	Ppp1r1c	-1.63157	1.24588	1.08898e-05	0.000167943
ENSMUSG00000115269.1	Gm5209	-2.18899	0.170922	1.10633e-05	0.000170208
ENSMUSG00000078972.1	Gm15557	-1.70284	-0.0120217	1.11489e-05	0.000171369
ENSMUSG00000034912.17	Mdga2	-1.32465	3.01917	1.12204e-05	0.000172364
ENSMUSG00000026000.16	Lancl1	-1.63807	1.79397	1.13009e-05	0.000173549
ENSMUSG00000117071.1	Gm9598	-2.17823	0.62824	1.15938e-05	0.000177673
ENSMUSG00000062093.5	Gm10110	-2.03711	1.24964	1.16482e-05	0.000178399
ENSMUSG00000019820.11	Utrn	-1.23929	2.82535	1.1786e-05	0.00018024
ENSMUSG00000020023.18	Tmcc3	-1.31223	1.85551	1.18056e-05	0.000180485
ENSMUSG00000083380.1	Ndufb4c	-2.05478	-0.0716872	1.18524e-05	0.000181147
ENSMUSG00000088356.1	NA	-1.89424	-0.355431	1.19761e-05	0.000182709
ENSMUSG00000058799.16	Nap1l1	-2.00412	4.66437	1.20712e-05	0.00018405
ENSMUSG00000112451.1	Gm6714	-2.05185	0.297373	1.21484e-05	0.000185117
ENSMUSG00000031210.10	Gpr165	-2.17735	1.84221	1.22411e-05	0.000186473
ENSMUSG00000040452.9	Cdh12	-1.91361	2.61993	1.24626e-05	0.000189621
ENSMUSG00000033386.10	Frrs1	-1.48631	2.37803	1.27854e-05	0.000194128
ENSMUSG00000093211.1	NA	-1.86285	-0.368312	1.27926e-05	0.000194179
ENSMUSG00000004364.14	Cul3	-1.48682	1.42238	1.28857e-05	0.000195418
ENSMUSG00000014542.3	Clec4f	-1.48284	0.141861	1.31024e-05	0.000198175
ENSMUSG00000105789.1	Gm42997	-2.57061	1.68606	1.31707e-05	0.00019903
ENSMUSG00000094426.3	Olfr478	-1.60029	0.337439	1.32082e-05	0.000199479
ENSMUSG00000002274.12	Metrn	-1.63622	0.217716	1.3414e-05	0.000202229
ENSMUSG00000103358.1	Gm37593	-2.19842	2.30623	1.34517e-05	0.000202737
ENSMUSG00000096525.2	Gm2663	-2.13165	-0.275855	1.34726e-05	0.000202991
ENSMUSG00000112046.1	Gm5175	-1.87999	0.711767	1.35517e-05	0.000204063
ENSMUSG00000032549.7	Rab6b	-1.49345	2.14102	1.3567e-05	0.000204173
ENSMUSG00000024878.8	Cbwd1	-1.68621	1.60155	1.36036e-05	0.000204565
ENSMUSG00000108752.1	Gm45191	-1.68479	0.807963	1.36091e-05	0.000204565
ENSMUSG00000074655.1	Gm1527	-2.13708	1.08616	1.37416e-05	0.000206375
ENSMUSG00000083401.1	Gm13506	-1.87123	-0.103023	1.37903e-05	0.000207045
ENSMUSG00000114014.1	Gm48350	-2.45927	0.221359	1.39736e-05	0.000209489
ENSMUSG00000087823.1	Gm22281	-2.07044	-0.328102	1.41314e-05	0.000211421
ENSMUSG00000055639.16	Dach1	-1.21015	0.808286	1.42048e-05	0.000212331
ENSMUSG00000021277.16	Traf3	-1.26847	0.915206	1.44013e-05	0.000214891
ENSMUSG00000058513.7	Olfr801	-1.97929	0.888531	1.45279e-05	0.000216591
ENSMUSG00000110894.1	Gm48335	-1.8231	0.904069	1.4547e-05	0.000216812
ENSMUSG00000022391.16	Rangap1	-1.36522	1.89902	1.45628e-05	0.000216984
ENSMUSG00000033107.6	Rnf125	-1.7316	0.9098	1.46135e-05	0.000217613
ENSMUSG00000104194.1	Gm33354	-1.89295	-0.308152	1.47126e-05	0.000218897
ENSMUSG00000110879.2	Olfr1010	-2.02116	1.0743	1.4725e-05	0.000219017
ENSMUSG00000022604.18	Cep97	-1.20353	1.95962	1.48153e-05	0.000220039
ENSMUSG00000067578.3	Cbln4	-1.4814	0.669288	1.49569e-05	0.00022183
ENSMUSG00000087497.7	2810001G20Rik	-2.32584	1.01348	1.51257e-05	0.000223933
ENSMUSG00000050276.7	Mrgprg	-1.48758	0.357917	1.51474e-05	0.000224125
ENSMUSG00000107093.1	Gm43452	-1.72344	-0.298684	1.52074e-05	0.000224882
ENSMUSG00000083197.1	Gm13581	-2.00989	-0.0714965	1.52764e-05	0.000225706
ENSMUSG00000093023.2	NA	-1.84886	0.201196	1.55045e-05	0.000228612
ENSMUSG00000083716.4	Gm13436	-1.93065	-0.061845	1.55592e-05	0.000229221
ENSMUSG00000091732.1	Gm17541	-2.04711	0.200132	1.56336e-05	0.000230185
ENSMUSG00000032401.15	Lctl	-1.86621	0.505896	1.56685e-05	0.000230632
ENSMUSG00000034022.8	Cpsf1	-1.38642	0.896285	1.5941e-05	0.000234277
ENSMUSG00000026924.17	Sec16a	-1.30756	1.12593	1.6062e-05	0.000235879
ENSMUSG00000097815.1	NA	-1.76705	0.49676	1.62435e-05	0.00023827
ENSMUSG00000086795.1	Gm11579	-1.79492	-0.352703	1.63155e-05	0.00023912
ENSMUSG00000090330.2	9130221H12Rik	-1.68441	0.407442	1.65216e-05	0.000241779
ENSMUSG00000028016.9	Ints12	-1.64137	1.92966	1.65253e-05	0.000241779
ENSMUSG00000117474.1	Gm50086	-1.74671	0.0197922	1.66458e-05	0.000243263
ENSMUSG00000078754.2	Scgb2b3	-2.11954	-0.257161	1.67959e-05	0.000245243
ENSMUSG00000061436.15	Hipk2	-1.31719	1.72002	1.69745e-05	0.00024758
ENSMUSG00000040321.3	Zfp770	-1.71162	2.03161	1.70815e-05	0.000248918
ENSMUSG00000081352.1	Gm12389	-1.8516	0.0192676	1.71993e-05	0.000250491
ENSMUSG00000108798.1	Gm9521	-2.17611	1.95057	1.72674e-05	0.000251268
ENSMUSG00000084880.1	Tomm6os	-1.12476	0.34776	1.74109e-05	0.000252852
ENSMUSG00000103751.1	Gm37283	-2.04386	1.43543	1.74219e-05	0.000252939
ENSMUSG00000022283.15	Pabpc1	-1.23178	2.0833	1.75386e-05	0.000254272
ENSMUSG00000108929.2	Cc2d2b	-1.383	0.881766	1.7555e-05	0.000254438
ENSMUSG00000112196.1	Gm8274	-1.88946	-0.398417	1.75806e-05	0.000254664
ENSMUSG00000064302.13	Clasp1	-1.31497	3.6399	1.76049e-05	0.000254871
ENSMUSG00000113466.1	Gm48649	-1.9082	0.357888	1.7619e-05	0.000255
ENSMUSG00000103032.1	Gm37121	-1.72387	0.556284	1.77238e-05	0.000256303
ENSMUSG00000048895.13	Cdk5r1	-1.54489	1.93575	1.78021e-05	0.000257288
ENSMUSG00000038147.13	Cd84	-1.67194	2.23395	1.78387e-05	0.000257745
ENSMUSG00000029468.17	P2rx7	-1.67777	1.8416	1.78599e-05	0.000257978
ENSMUSG00000049214.13	Skint7	-1.77556	1.16351	1.79189e-05	0.000258757
ENSMUSG00000107935.1	Gm4872	-2.44699	1.42528	1.7929e-05	0.000258829
ENSMUSG00000040822.7	1700123O20Rik	-1.25304	0.195959	1.81121e-05	0.000261399
ENSMUSG00000010048.10	Ifrd2	-1.16561	0.149004	1.85164e-05	0.000266782
ENSMUSG00000030149.15	Klrk1	-1.37491	2.05475	1.85425e-05	0.000267083
ENSMUSG00000065301.1	Gm23248	-1.99313	-0.268104	1.86039e-05	0.000267891
ENSMUSG00000034636.9	Zyg11b	-1.21083	2.53435	1.88477e-05	0.000271096
ENSMUSG00000009292.18	Trpm2	-1.46623	2.61737	1.90739e-05	0.000274195
ENSMUSG00000074738.2	Fndc10	-1.37006	0.676951	1.90927e-05	0.000274388
ENSMUSG00000033429.10	Mcee	-1.91088	0.0756918	1.91304e-05	0.000274852
ENSMUSG00000109662.1	Gm45366	-2.66645	1.54282	1.92285e-05	0.000276184
ENSMUSG00000083951.1	Gm13786	-2.35504	0.119277	1.93042e-05	0.000277193
ENSMUSG00000068075.3	Gm10229	-1.60481	-0.429854	1.93214e-05	0.000277362
ENSMUSG00000086422.1	4930421P07Rik	-1.81117	-0.402398	1.94508e-05	0.000278767
ENSMUSG00000116572.1	Gm49695	-2.16751	1.45125	1.95825e-05	0.000280341
ENSMUSG00000030530.15	Furin	-1.29385	1.94268	1.95839e-05	0.000280341
ENSMUSG00000034723.11	Tmx4	-1.4511	3.06335	1.96072e-05	0.000280597
ENSMUSG00000020428.13	Gabra6	-1.81849	1.13815	1.96411e-05	0.000281004
ENSMUSG00000109017.1	Gm38979	-1.63085	-0.0293795	1.97269e-05	0.000282021
ENSMUSG00000024782.7	Ak3	-1.66693	1.15962	1.97878e-05	0.000282627
ENSMUSG00000083942.4	Scgb1b26-ps	-2.23071	0.0544148	1.99966e-05	0.00028537
ENSMUSG00000089804.2	Gm16136	-1.42071	-0.121824	2.02335e-05	0.000287865
ENSMUSG00000067219.9	Nipal1	-1.90159	3.10585	2.02879e-05	0.000288383
ENSMUSG00000030659.14	Nucb2	-1.71065	0.698488	2.0291e-05	0.000288383
ENSMUSG00000084393.1	Gm14101	-2.05025	0.580357	2.06337e-05	0.000292824
ENSMUSG00000092588.1	Gm20534	-2.61788	-0.047357	2.07727e-05	0.000294388
ENSMUSG00000113665.1	Gm47603	-1.65077	0.29016	2.09065e-05	0.00029612
ENSMUSG00000096735.3	Vmn1r79	-1.94019	1.35479	2.1154e-05	0.000299375
ENSMUSG00000070576.4	Mn1	-1.14924	1.51371	2.12193e-05	0.000300216
ENSMUSG00000064128.8	Cenpj	-1.52775	1.12308	2.15361e-05	0.000304362
ENSMUSG00000036833.16	Pnpla7	-1.47036	2.00157	2.16274e-05	0.000305466
ENSMUSG00000044393.15	Dsg2	-1.52651	2.00188	2.16601e-05	0.00030569
ENSMUSG00000074513.9	Arfip1	-1.34821	-0.0843582	2.17294e-05	0.000306499
ENSMUSG00000065768.1	Gm23845	-2.3676	-0.108973	2.1787e-05	0.000307142
ENSMUSG00000107685.1	Gm5995	-1.84073	0.216856	2.2048e-05	0.000310393
ENSMUSG00000082310.1	Gm12904	-1.93394	0.461729	2.20973e-05	0.000310915
ENSMUSG00000031093.14	Dock11	-1.45977	2.46583	2.21577e-05	0.000311545
ENSMUSG00000021395.11	Spin1	-1.64223	1.45488	2.21748e-05	0.000311662
ENSMUSG00000108401.1	Rpl19-ps10	-2.03955	-0.15022	2.21902e-05	0.000311793
ENSMUSG00000116590.1	Gm53028	-1.69939	0.21803	2.24054e-05	0.00031447
ENSMUSG00000105205.1	NA	-2.08944	-0.33031	2.25051e-05	0.000315783
ENSMUSG00000104881.1	Gm43711	-2.09854	-0.104051	2.25529e-05	0.000316367
ENSMUSG00000086067.1	Gm16183	-1.75464	1.20942	2.2749e-05	0.000318942
ENSMUSG00000091050.1	9330020H09Rik	-1.54038	1.67436	2.28832e-05	0.000320736
ENSMUSG00000117555.1	Gm49992	-2.59282	1.35596	2.31101e-05	0.000323649
ENSMUSG00000035086.13	Becn1	-1.3908	2.15286	2.3238e-05	0.000324994
ENSMUSG00000020780.15	Srp68	-1.31359	1.12776	2.32507e-05	0.000324994
ENSMUSG00000104597.1	B230334C09Rik	-1.47682	2.27623	2.34498e-05	0.000327687
ENSMUSG00000062737.13	Prl3d2	-2.38473	0.177705	2.35402e-05	0.000328861
ENSMUSG00000092357.1	Vmn2r-ps83	-2.04834	0.805453	2.38432e-05	0.000332547
ENSMUSG00000047969.5	Olfr1093	-1.9333	0.453789	2.38497e-05	0.000332547
ENSMUSG00000115099.1	1700087I21Rik	-1.62047	0.413633	2.42501e-05	0.000337485
ENSMUSG00000092397.7	C130080G10Rik	-1.95323	0.358645	2.43098e-05	0.000338039
ENSMUSG00000075569.10	Rsph10b	-1.6206	0.647249	2.45639e-05	0.000341201
ENSMUSG00000068036.15	Afdn	-1.36489	1.94201	2.46851e-05	0.000342419
ENSMUSG00000040663.8	Clcf1	-1.46846	-0.194988	2.49334e-05	0.00034547
ENSMUSG00000030341.17	Tnfrsf1a	-1.30833	0.356617	2.49681e-05	0.000345686
ENSMUSG00000058546.8	Rpl23a	-2.01681	2.02729	2.50262e-05	0.000346303
ENSMUSG00000116124.1	Gm49420	-1.77465	0.00528805	2.50254e-05	0.000346303
ENSMUSG00000001829.17	Clpb	-1.38565	2.65652	2.50375e-05	0.000346366
ENSMUSG00000071753.12	Cdr1os	-1.36503	3.81359	2.50881e-05	0.000346971
ENSMUSG00000006705.12	Pknox1	-1.35334	1.58956	2.52578e-05	0.000349034
ENSMUSG00000024287.8	Thoc1	-1.30296	1.4758	2.52649e-05	0.000349038
ENSMUSG00000015002.18	Efr3a	-1.51658	3.15011	2.53511e-05	0.00035004
ENSMUSG00000110014.1	Gm5361	-1.53182	-0.3925	2.54497e-05	0.000351116
ENSMUSG00000104790.1	Gm43276	-1.91005	-0.345956	2.55348e-05	0.0003521
ENSMUSG00000097767.8	Miat	-1.38721	1.28945	2.55524e-05	0.000352248
ENSMUSG00000090225.1	Gm11559	-2.40006	0.471742	2.58953e-05	0.000356014
ENSMUSG00000004207.14	Psap	-1.70513	1.49256	2.67818e-05	0.000366916
ENSMUSG00000115130.1	Gm49152	-1.79695	0.391556	2.68269e-05	0.000367436
ENSMUSG00000107421.1	Gm44177	-1.42519	-0.119581	2.68747e-05	0.000367992
ENSMUSG00000115015.1	D330046F09Rik	-2.02962	0.238811	2.70578e-05	0.000369962
ENSMUSG00000104466.1	Gm10513	-1.71361	1.27408	2.7169e-05	0.000371224
ENSMUSG00000029153.11	Ociad2	-1.41775	0.772728	2.73584e-05	0.000373413
ENSMUSG00000029661.16	Col1a2	-1.63413	3.64923	2.74568e-05	0.000374356
ENSMUSG00000015971.5	Actr8	-1.09751	1.24335	2.7561e-05	0.000375675
ENSMUSG00000037486.18	Asxl2	-1.08567	2.75164	2.75993e-05	0.000376097
ENSMUSG00000063903.5	Klk1	-1.66729	0.0916313	2.7654e-05	0.000376541
ENSMUSG00000059714.13	Flot1	-1.61681	0.93946	2.76481e-05	0.000376541
ENSMUSG00000046794.9	Ppp1r3b	-1.42366	1.14447	2.77053e-05	0.000377139
ENSMUSG00000104899.1	Gm43855	-1.86315	-0.310248	2.79139e-05	0.000379574
ENSMUSG00000110419.1	AW046200	-1.15057	0.431719	2.82104e-05	0.000383503
ENSMUSG00000110404.1	Rnf223	-1.54101	-0.0204977	2.83099e-05	0.000384754
ENSMUSG00000074637.7	Sox2	-1.44796	1.26228	2.83421e-05	0.000384986
ENSMUSG00000070203.1	Gm22444	-2.06139	-0.0673668	2.84228e-05	0.000385848
ENSMUSG00000022382.15	Wnt7b	-1.31782	1.64099	2.84864e-05	0.000386281
ENSMUSG00000116389.1	Gm49504	-1.74657	1.37548	2.85925e-05	0.000387192
ENSMUSG00000031990.15	Jam3	-1.56983	1.05031	2.87213e-05	0.000388586
ENSMUSG00000035242.15	Oaz1	-1.48618	1.27162	2.89576e-05	0.000391576
ENSMUSG00000085527.1	Gm15535	-1.78924	0.854545	2.91766e-05	0.000394329
ENSMUSG00000024383.9	Map3k2	-1.18842	2.2338	2.92701e-05	0.000395173
ENSMUSG00000074158.9	Zfp976	-1.6744	0.596414	2.97631e-05	0.000400906
ENSMUSG00000022517.17	Mgrn1	-1.39644	1.34131	2.97654e-05	0.000400906
ENSMUSG00000102439.4	Flg	-1.39891	1.09582	2.98502e-05	0.000401943
ENSMUSG00000081526.1	Gm7219	-2.2115	0.431272	3.00142e-05	0.000404044
ENSMUSG00000064572.1	Gm25801	-2.27599	-0.109598	3.02004e-05	0.000405908
ENSMUSG00000059796.16	Eif4a1	-1.286	1.21377	3.04308e-05	0.000408682
ENSMUSG00000109827.1	Gm6213	-1.52844	-0.302985	3.05827e-05	0.000410506
ENSMUSG00000021591.8	Glrx	-1.70286	1.26537	3.06505e-05	0.000411199
ENSMUSG00000102994.1	Gm37767	-2.09284	1.05928	3.14005e-05	0.000420378
ENSMUSG00000021661.16	Ankra2	-1.80639	1.8135	3.14445e-05	0.000420856
ENSMUSG00000055116.8	Arntl	-1.48576	2.72318	3.16123e-05	0.00042277
ENSMUSG00000026470.14	Stx6	-1.22963	1.63658	3.16052e-05	0.00042277
ENSMUSG00000047654.6	Tssk6	-1.23917	0.675348	3.17725e-05	0.00042437
ENSMUSG00000103990.1	Ighv8-3	-1.86808	-0.321909	3.21459e-05	0.000428559
ENSMUSG00000106062.1	Gm43820	-1.37589	0.0177838	3.22157e-05	0.000429295
ENSMUSG00000074028.4	Slc22a13	-1.69232	1.20503	3.22715e-05	0.000429897
ENSMUSG00000092260.7	Zfp963	-1.6324	-0.142322	3.24076e-05	0.00043126
ENSMUSG00000097025.1	Gm26558	-1.82294	2.31261	3.26989e-05	0.000434457
ENSMUSG00000112539.1	Gm40787	-1.89409	0.991052	3.28143e-05	0.00043571
ENSMUSG00000075227.6	Znhit2	-1.22948	0.441334	3.29553e-05	0.000437294
ENSMUSG00000033805.12	Ephx4	-1.56192	0.627931	3.31486e-05	0.000439402
ENSMUSG00000109352.1	Gm18256	-1.47076	-0.227849	3.31872e-05	0.000439799
ENSMUSG00000025089.15	Gfra1	-1.48136	1.61986	3.32337e-05	0.000440187
ENSMUSG00000061602.3	Vmn1r78	-1.63544	0.780964	3.3304e-05	0.000440775
ENSMUSG00000031198.4	Fundc2	-1.56336	0.541319	3.33999e-05	0.00044193
ENSMUSG00000094651.2	Gal3st2	-2.09033	-0.198393	3.37512e-05	0.000446115
ENSMUSG00000096202.1	NA	-1.93049	-0.369521	3.38629e-05	0.000447476
ENSMUSG00000108884.1	Gm45792	-1.70539	2.35695	3.38922e-05	0.000447747
ENSMUSG00000111880.1	Gm5040	-2.47972	0.967096	3.3903e-05	0.000447774
ENSMUSG00000103825.1	Gm38178	-2.00061	1.11253	3.40396e-05	0.00044923
ENSMUSG00000021259.5	Cyp46a1	-1.31695	1.03307	3.42665e-05	0.000451757
ENSMUSG00000115591.1	Gm31282	-1.59546	1.44073	3.43115e-05	0.000452125
ENSMUSG00000031068.8	Glrx3	-1.73857	2.48435	3.51803e-05	0.000461777
ENSMUSG00000082348.1	Gm12807	-2.13176	0.666229	3.53805e-05	0.000463927
ENSMUSG00000106423.1	Gm42825	-2.24654	0.506072	3.56995e-05	0.00046751
ENSMUSG00000111546.1	Gm47050	-1.94813	0.959065	3.57088e-05	0.000467512
ENSMUSG00000097569.2	Gm26640	-1.32778	0.348194	3.5999e-05	0.000471069
ENSMUSG00000101803.1	Gm28419	-1.95781	0.0108176	3.63448e-05	0.000474985
ENSMUSG00000113488.1	Gm47819	-1.4908	-0.432948	3.65792e-05	0.000477804
ENSMUSG00000032449.13	Slc25a36	-1.27805	1.44373	3.66097e-05	0.00047808
ENSMUSG00000029681.12	Bcl7b	-1.32159	0.924405	3.68379e-05	0.000480446
ENSMUSG00000086022.1	Rad51ap2	-1.51195	2.91272	3.69278e-05	0.000481373
ENSMUSG00000041801.5	Phlda3	-1.46813	0.977124	3.69789e-05	0.000481915
ENSMUSG00000104626.1	Gm42675	-1.77641	1.98257	3.77125e-05	0.000490474
ENSMUSG00000026124.4	Cfc1	-1.71071	-0.0858518	3.77774e-05	0.000491192
ENSMUSG00000082054.1	Psmb6-ps	-2.07316	0.388248	3.78697e-05	0.000492047
ENSMUSG00000107859.1	Gm30731	-1.65215	-0.301993	3.81333e-05	0.000495064
ENSMUSG00000090527.2	Aadacl2fm2	-1.64465	-0.0422826	3.8146e-05	0.000495103
ENSMUSG00000033361.13	Prrg3	-1.43514	0.504967	3.82706e-05	0.000496468
ENSMUSG00000111375.4	Btbd8	-1.60171	2.05878	3.8359e-05	0.000497126
ENSMUSG00000059565.4	Gm5292	-1.76607	0.222145	3.84146e-05	0.000497703
ENSMUSG00000072847.4	A530017D24Rik	-1.65715	0.597019	3.86135e-05	0.000499646
ENSMUSG00000047161.12	Chst9	-1.18937	-0.314808	3.87151e-05	0.000500707
ENSMUSG00000081285.2	Gm18859	-1.70784	-0.140232	3.91724e-05	0.000505852
ENSMUSG00000105176.1	Gm43668	-1.47251	0.621234	3.97405e-05	0.000512152
ENSMUSG00000078126.4	Rpl23a-ps3	-1.58163	-0.290501	3.99374e-05	0.000514299
ENSMUSG00000056076.13	Eif3b	-1.4056	1.26392	4.01069e-05	0.000516092
ENSMUSG00000020361.13	Hspa4	-1.22524	3.03536	4.02611e-05	0.000517946
ENSMUSG00000022701.18	Ccdc191	-1.40978	1.19256	4.02946e-05	0.000518246
ENSMUSG00000047013.15	Fbxo41	-1.21288	1.21897	4.05031e-05	0.000520796
ENSMUSG00000027751.13	Supt20	-1.40391	2.19054	4.0857e-05	0.000524554
ENSMUSG00000022489.6	Pde1b	-1.29301	0.323228	4.08726e-05	0.000524623
ENSMUSG00000072419.5	Dppa2	-1.77537	1.60658	4.11462e-05	0.000527736
ENSMUSG00000022265.7	Ank	-1.27145	0.391042	4.11915e-05	0.000528059
ENSMUSG00000053963.7	Stum	-1.25858	0.461279	4.12516e-05	0.00052869
ENSMUSG00000055945.8	Prr18	-1.43972	1.26086	4.12795e-05	0.000528915
ENSMUSG00000046388.4	Gm9806	-1.73373	0.160461	4.13771e-05	0.000530032
ENSMUSG00000022195.7	6030458C11Rik	-1.33704	1.24069	4.20403e-05	0.000537717
ENSMUSG00000107140.1	Gm43811	-1.88912	-0.220638	4.21723e-05	0.000539136
ENSMUSG00000078612.9	Fyb2	-1.47424	0.464701	4.2228e-05	0.000539578
ENSMUSG00000082958.1	Gm12731	-2.16549	0.509547	4.25332e-05	0.000542987
ENSMUSG00000002835.9	Chaf1a	-1.29622	2.10014	4.26504e-05	0.000544157
ENSMUSG00000056481.6	Cd248	-1.53356	1.53202	4.29781e-05	0.000547381
ENSMUSG00000040025.17	Ythdf2	-1.51558	2.0659	4.32346e-05	0.000550236
ENSMUSG00000114665.1	Lncbate6	-1.43498	-0.121918	4.36608e-05	0.000555102
ENSMUSG00000103590.1	Gm37353	-2.22154	0.14576	4.37706e-05	0.00055581
ENSMUSG00000025140.15	Pycr1	-1.42417	0.954927	4.37663e-05	0.00055581
ENSMUSG00000103241.1	Gm38089	-1.65826	-0.0253227	4.3852e-05	0.000556706
ENSMUSG00000095576.5	Fmo6	-1.58823	0.112262	4.42217e-05	0.000560841
ENSMUSG00000086000.1	Gm12493	-1.57249	-0.324313	4.45672e-05	0.000564381
ENSMUSG00000026113.17	Inpp4a	-1.10072	2.12304	4.61502e-05	0.000581543
ENSMUSG00000017733.4	Eppin	-1.9725	0.29778	4.62515e-05	0.0005821
ENSMUSG00000094764.2	Olfr346	-1.81784	0.596473	4.62459e-05	0.0005821
ENSMUSG00000075073.3	Olfr1256	-1.7892	2.07882	4.62291e-05	0.0005821
ENSMUSG00000047759.6	Hs3st3a1	-1.36288	0.360146	4.62513e-05	0.0005821
ENSMUSG00000075202.5	Olfr1042	-1.80396	1.46753	4.64438e-05	0.000584089
ENSMUSG00000097458.1	NA	-1.40149	0.404427	4.64718e-05	0.000584297
ENSMUSG00000105553.1	Gm42514	-1.71589	0.16486	4.6695e-05	0.00058667
ENSMUSG00000114464.1	Gm18071	-1.75151	-0.261032	4.71194e-05	0.000591275
ENSMUSG00000054263.12	Lifr	-1.30949	1.45594	4.75984e-05	0.000596845
ENSMUSG00000113540.1	Gm47206	-1.56226	-0.119409	4.77788e-05	0.000598373
ENSMUSG00000041012.4	Cmtm8	-1.31913	0.954592	4.79337e-05	0.000599871
ENSMUSG00000109904.1	Gm45819	-1.60503	0.899371	4.8006e-05	0.000600628
ENSMUSG00000041961.14	Znrf3	-1.38262	1.52419	4.80266e-05	0.000600738
ENSMUSG00000105947.1	Gm43789	-1.53195	0.334052	4.82883e-05	0.00060351
ENSMUSG00000082704.1	Gm12515	-1.91034	-0.362329	4.84179e-05	0.000604744
ENSMUSG00000037740.8	Mrps26	-1.65968	1.86641	4.88612e-05	0.000609685
ENSMUSG00000041308.6	Sntb2	-1.16716	1.97949	4.91289e-05	0.000612575
ENSMUSG00000020380.16	Rad50	-1.16834	1.57561	4.91607e-05	0.000612822
ENSMUSG00000086213.2	A330040F15Rik	-1.49532	0.586206	5.0259e-05	0.000624077
ENSMUSG00000112428.1	Gm48106	-1.74916	-0.318761	5.06341e-05	0.000628273
ENSMUSG00000061292.10	Cyp3a59	-1.69994	0.426989	5.06953e-05	0.000628727
ENSMUSG00000024529.13	Lox	-1.39361	0.541512	5.08246e-05	0.000630025
ENSMUSG00000090460.3	Gm17511	-2.34946	1.88019	5.10732e-05	0.000632185
ENSMUSG00000082077.1	Olfr260-ps1	-1.66464	-0.0822772	5.13277e-05	0.000635028
ENSMUSG00000024580.7	Grpel2	-1.31988	0.483439	5.16464e-05	0.00063867
ENSMUSG00000034032.15	Rpap1	-1.54554	2.25601	5.17301e-05	0.000639541
ENSMUSG00000096222.1	NA	-2.02878	-0.0716359	5.18682e-05	0.000640939
ENSMUSG00000037270.18	4932438A13Rik	-1.02451	2.9555	5.19965e-05	0.000642057
ENSMUSG00000083483.3	Gm14044	-2.13497	0.421612	5.20352e-05	0.00064238
ENSMUSG00000085152.1	Gm11496	-1.25456	-0.388901	5.21501e-05	0.000643487
ENSMUSG00000106365.1	Gm43568	-2.14401	0.992896	5.2203e-05	0.000643984
ENSMUSG00000024222.17	Fkbp5	-1.14102	1.48601	5.31565e-05	0.000654639
ENSMUSG00000107195.1	4930589O11Rik	-1.52437	0.076	5.33074e-05	0.000656339
ENSMUSG00000099458.1	Gm19123	-1.74676	-0.347658	5.37193e-05	0.000660773
ENSMUSG00000097295.1	Hmgb1-ps8	-2.24217	0.719188	5.40493e-05	0.000664512
ENSMUSG00000019916.14	P4ha1	-1.83394	4.22717	5.41024e-05	0.000665005
ENSMUSG00000117084.1	Gm22146	-1.83309	1.7669	5.47639e-05	0.000672327
ENSMUSG00000074811.2	Hps6	-1.27958	0.31908	5.47562e-05	0.000672327
ENSMUSG00000112927.1	Gm48332	-2.08364	0.429145	5.48357e-05	0.000672764
ENSMUSG00000116010.1	Gm36026	-1.2584	-0.0067482	5.48391e-05	0.000672764
ENSMUSG00000090509.2	Sfta2	-1.35567	0.184729	5.48782e-05	0.000673082
ENSMUSG00000042157.2	Sprr2i	-2.03181	-0.172767	5.53505e-05	0.000678574
ENSMUSG00000047793.13	Sned1	-1.03261	1.83671	5.57132e-05	0.00068234
ENSMUSG00000027248.13	Pdia3	-1.58123	1.21551	5.61234e-05	0.000687198
ENSMUSG00000065340.1	Gm25578	-1.84757	-0.21631	5.6369e-05	0.000689709
ENSMUSG00000093839.2	Olfr462	-1.49778	0.488868	5.65632e-05	0.000691691
ENSMUSG00000081807.1	Gm14849	-1.23255	0.291767	5.66959e-05	0.000692878
ENSMUSG00000022863.15	Btg3	-1.33037	0.622878	5.68233e-05	0.00069412
ENSMUSG00000005043.13	Sgsh	-1.45547	0.708048	5.69958e-05	0.000696045
ENSMUSG00000026700.4	Tnfsf4	-1.92986	0.564198	5.72568e-05	0.000698805
ENSMUSG00000027394.13	Ttl	-1.06054	0.926105	5.76475e-05	0.000703101
ENSMUSG00000111622.1	Gm21041	-1.77926	-0.113265	5.77597e-05	0.000704025
ENSMUSG00000082745.1	Gm15181	-2.15423	0.2294	5.79461e-05	0.000705822
ENSMUSG00000049939.6	Lrrc4	-1.65433	1.54488	5.80841e-05	0.000707305
ENSMUSG00000014850.15	Msh3	-1.26957	2.05418	5.83067e-05	0.000709508
ENSMUSG00000098439.1	Hm629797	-1.57919	0.443456	5.84975e-05	0.00071166
ENSMUSG00000043510.12	Hscb	-1.56853	0.522271	5.85626e-05	0.000712146
ENSMUSG00000117244.1	Gm9210	-1.69369	0.0463668	5.86861e-05	0.000713444
ENSMUSG00000103693.1	Gm37529	-1.57587	1.39172	5.8714e-05	0.000713613
ENSMUSG00000020895.14	Tmem107	-1.65295	0.0753768	5.88023e-05	0.000714346
ENSMUSG00000097289.1	NA	-1.50691	1.28637	5.88622e-05	0.000714903
ENSMUSG00000091512.5	Lamtor3	-1.55376	0.966885	5.89231e-05	0.000715329
ENSMUSG00000019845.8	Tube1	-1.27173	1.44493	5.89252e-05	0.000715329
ENSMUSG00000029922.15	Mkrn1	-1.41215	1.38536	5.91387e-05	0.000717579
ENSMUSG00000039849.5	Pcif1	-1.45859	1.70479	5.96032e-05	0.000722528
ENSMUSG00000104621.1	Gm43185	-1.62988	0.990764	5.96432e-05	0.000722772
ENSMUSG00000034751.16	Mast4	-1.27529	3.89391	5.96598e-05	0.000722772
ENSMUSG00000066724.3	Gm10175	-1.30057	-0.40144	5.96838e-05	0.000722818
ENSMUSG00000032915.6	Adgre4	-1.42744	0.746016	5.97657e-05	0.000723467
ENSMUSG00000098667.1	NA	-1.89354	-0.111066	5.97898e-05	0.000723587
ENSMUSG00000082119.1	Cyp2j14-ps	-1.64875	-0.362561	6.00211e-05	0.00072587
ENSMUSG00000075266.5	Cenpw	-1.48181	0.8118	6.05066e-05	0.000731049
ENSMUSG00000084942.1	7330404K18Rik	-1.99122	0.227078	6.07271e-05	0.000733539
ENSMUSG00000098360.1	4930535O05Rik	-1.82399	-0.223812	6.07655e-05	0.000733829
ENSMUSG00000084143.1	Gm13400	-1.76287	0.0545182	6.10086e-05	0.000736069
ENSMUSG00000100146.1	1700020M21Rik	-1.74035	-0.111033	6.13889e-05	0.000739958
ENSMUSG00000083625.1	Gm15188	-1.82749	-0.257882	6.18936e-05	0.000745513
ENSMUSG00000039067.5	Psmd7	-1.26416	1.47702	6.29744e-05	0.000756746
ENSMUSG00000083291.3	Gm13679	-1.66711	-0.229645	6.32371e-05	0.000758868
ENSMUSG00000002546.16	Golga2	-1.16901	3.87415	6.33933e-05	0.000760168
ENSMUSG00000026078.10	Pdcl3	-1.09929	0.614797	6.35721e-05	0.000761955
ENSMUSG00000081469.1	Vmn1r-ps95	-1.8501	-0.343273	6.51047e-05	0.00077795
ENSMUSG00000027297.14	Ltk	-1.25565	0.576553	6.64948e-05	0.000793115
ENSMUSG00000109379.1	Gm44550	-2.04846	1.08702	6.68803e-05	0.000796964
ENSMUSG00000029538.14	Srsf9	-1.11313	0.236443	6.72676e-05	0.000800795
ENSMUSG00000112909.1	Gm10120	-1.89933	0.122793	6.7416e-05	0.000802375
ENSMUSG00000033618.7	Map3k13	-1.35418	1.90198	6.76171e-05	0.000804581
ENSMUSG00000101496.1	Gm8885	-1.84176	0.0444951	6.81762e-05	0.000810666
ENSMUSG00000085059.1	Gm11750	-1.63479	-0.0995204	6.88763e-05	0.000817657
ENSMUSG00000111110.1	Gm36855	-1.55763	0.461625	6.92517e-05	0.00082135
ENSMUSG00000079550.9	Mpp4	-1.45337	1.27571	7.00111e-05	0.000829167
ENSMUSG00000098001.1	Gm27048	-1.33259	0.353814	7.00598e-05	0.000829393
ENSMUSG00000020032.14	Nuak1	-1.2019	1.57536	7.027e-05	0.00083111
ENSMUSG00000056629.15	Fkbp2	-1.57883	1.1018	7.07233e-05	0.000835697
ENSMUSG00000056145.5	AI504432	-1.51742	2.23335	7.12201e-05	0.000840595
ENSMUSG00000116029.1	Gm41414	-1.3023	-0.34201	7.13553e-05	0.000841996
ENSMUSG00000090889.1	Gm17428	-2.50956	2.38309	7.20534e-05	0.000849448
ENSMUSG00000046714.7	Foxc2	-1.12183	1.19373	7.21498e-05	0.000850192
ENSMUSG00000115085.1	Gm9198	-1.30352	-0.0221898	7.24542e-05	0.000852991
ENSMUSG00000086112.1	4930563I02Rik	-1.52457	-0.271185	7.31002e-05	0.0008602
ENSMUSG00000047819.3	Tigd4	-1.62824	1.36279	7.31508e-05	0.000860597
ENSMUSG00000029253.12	Cenpc1	-1.33735	1.64365	7.33199e-05	0.00086199
ENSMUSG00000037966.15	Ninj1	-1.00739	-0.13645	7.37091e-05	0.000865843
ENSMUSG00000055762.16	Eef1d	-1.51485	1.45404	7.37843e-05	0.000866452
ENSMUSG00000109006.2	B230209E15Rik	-1.89591	1.94497	7.41794e-05	0.000870491
ENSMUSG00000027474.12	Ccm2l	-1.35321	0.872427	7.45981e-05	0.0008744
ENSMUSG00000109407.1	Gm34664	-1.79319	2.00381	7.46275e-05	0.000874411
ENSMUSG00000037104.9	Socs5	-1.15378	1.42026	7.46587e-05	0.000874508
ENSMUSG00000028333.10	Anp32b	-1.37763	0.61767	7.48602e-05	0.000876179
ENSMUSG00000037280.12	Galnt6	-1.17475	0.50062	7.487e-05	0.000876179
ENSMUSG00000110165.1	Btf3-ps18	-1.7799	0.630612	7.49205e-05	0.000876568
ENSMUSG00000032565.9	Nudt16	-1.3206	0.293579	7.5184e-05	0.000879248
ENSMUSG00000022770.17	Dlg1	-1.22413	2.4879	7.54506e-05	0.00088176
ENSMUSG00000049719.14	Prss46	-1.1485	-0.158956	7.54473e-05	0.00088176
ENSMUSG00000018574.14	Acadvl	-1.54003	0.37198	7.55046e-05	0.000882189
ENSMUSG00000045248.6	Med26	-1.17556	0.58116	7.58579e-05	0.000885506
ENSMUSG00000034574.10	Daam1	-1.15383	1.75528	7.70241e-05	0.000898298
ENSMUSG00000026774.11	Potegl	-1.37965	-0.0239224	7.70964e-05	0.000898935
ENSMUSG00000020649.11	Rrm2	-1.21571	0.442195	7.71281e-05	0.0008991
ENSMUSG00000029454.15	Mapkapk5	-1.22626	0.319564	7.718e-05	0.000899499
ENSMUSG00000028773.8	Fabp3	-2.15902	0.570711	7.77505e-05	0.000905528
ENSMUSG00000034684.12	Sema3f	-1.20533	2.03608	7.78638e-05	0.000906434
ENSMUSG00000025940.6	Tmem70	-1.56731	0.186745	7.80525e-05	0.000908423
ENSMUSG00000109057.1	Gm44741	-1.34488	-0.11152	7.83188e-05	0.000910693
ENSMUSG00000081427.1	Gm12382	-2.42188	1.57896	7.85855e-05	0.000913586
ENSMUSG00000039001.12	Rps21	-1.69837	0.624969	7.89164e-05	0.000917224
ENSMUSG00000106845.1	Gm43156	-1.20662	-0.196244	7.94405e-05	0.000922684
ENSMUSG00000094531.3	Olfr671	-1.81337	1.23786	8.01003e-05	0.000929713
ENSMUSG00000039809.10	Gabbr2	-1.20626	2.34099	8.04327e-05	0.000932936
ENSMUSG00000115163.1	Gm18076	-1.82123	-0.0941178	8.05866e-05	0.000934083
ENSMUSG00000043542.12	Zc2hc1a	-1.58832	1.9871	8.06068e-05	0.000934106
ENSMUSG00000086903.4	Hotair	-1.14992	0.379228	8.08178e-05	0.000936338
ENSMUSG00000035860.9	Cdhr3	-1.10731	0.583153	8.08943e-05	0.000936785
ENSMUSG00000035569.17	Ankrd11	-1.09154	3.2521	8.10268e-05	0.000937696
ENSMUSG00000071708.11	Sms	-1.56526	1.17318	8.11271e-05	0.000938643
ENSMUSG00000104418.1	Gm37070	-1.91628	0.742058	8.16687e-05	0.000944695
ENSMUSG00000108732.1	2310043P16Rik	-1.67591	1.31622	8.25207e-05	0.000953471
ENSMUSG00000095981.1	Ighv10-1	-2.12022	-0.179498	8.30971e-05	0.000959046
ENSMUSG00000025144.17	Cenpx	-1.84345	-0.157121	8.35249e-05	0.00096315
ENSMUSG00000069622.4	Gm10273	-1.77168	0.458727	8.35282e-05	0.00096315
ENSMUSG00000038299.16	Wdr36	-1.14588	1.14176	8.35689e-05	0.000963401
ENSMUSG00000032238.17	Rora	-1.16778	2.40697	8.39623e-05	0.000967062
ENSMUSG00000110397.1	Gm45540	-1.23436	0.111948	8.43084e-05	0.000970611
ENSMUSG00000025616.14	Usp16	-1.07326	1.64751	8.44116e-05	0.000971581
ENSMUSG00000037747.9	Phyhipl	-1.07865	1.75747	8.46454e-05	0.000974052
ENSMUSG00000074358.9	Ccdc61	-1.1682	0.629244	8.52118e-05	0.000979686
ENSMUSG00000110313.1	Gm45420	-1.316	-0.114784	8.5405e-05	0.000981687
ENSMUSG00000111548.1	Gm8162	-1.8547	0.851752	8.61401e-05	0.000989022
ENSMUSG00000105360.1	Gm7824	-1.65808	-0.319757	8.69768e-05	0.000998405
ENSMUSG00000063018.6	2010204K13Rik	-1.63226	0.778112	8.71467e-05	0.00100013
ENSMUSG00000022997.9	Wnt1	-1.00581	0.532606	8.72183e-05	0.00100073
ENSMUSG00000032199.13	Polr2m	-1.36453	0.110149	8.73604e-05	0.00100168
ENSMUSG00000039775.7	Defb3	-1.95237	-0.0266582	8.81596e-05	0.00100926
ENSMUSG00000080993.1	Gm12903	-1.81099	0.290323	8.82391e-05	0.00100994
ENSMUSG00000094803.1	NA	-1.72729	-0.403757	8.88669e-05	0.00101531
ENSMUSG00000109035.1	Gm45209	-1.54393	-0.346845	8.92384e-05	0.00101887
ENSMUSG00000085508.1	NA	-1.44964	-0.317513	8.9259e-05	0.00101887
ENSMUSG00000106314.1	Gm9632	-2.20074	1.01583	9.02091e-05	0.0010288
ENSMUSG00000027427.13	Polr3f	-1.42669	2.18368	9.05121e-05	0.00103202
ENSMUSG00000041390.18	Mdfic	-1.2549	1.53683	9.0634e-05	0.00103272
ENSMUSG00000079171.3	Gm13942	-1.97288	-0.0171234	9.15561e-05	0.0010423
ENSMUSG00000113004.1	Gm47951	-1.3241	1.44651	9.2225e-05	0.00104856
ENSMUSG00000039313.14	Minar1	-1.22292	0.63686	9.22446e-05	0.00104856
ENSMUSG00000106467.1	Gm43395	-1.76083	0.80853	9.29259e-05	0.00105577
ENSMUSG00000044125.6	9530080O11Rik	-1.50172	0.22012	9.31221e-05	0.00105777
ENSMUSG00000097392.2	Thoc2l	-1.76184	2.52762	9.3517e-05	0.00106107
ENSMUSG00000083064.1	Gm7785	-1.65499	-0.196228	9.3634e-05	0.00106216
ENSMUSG00000030934.9	Oat	-1.49811	0.44761	9.36756e-05	0.0010624
ENSMUSG00000026321.7	Tnfrsf11a	-1.0329	0.387138	9.40619e-05	0.00106631
ENSMUSG00000042429.8	Adora1	-1.58676	2.88355	9.53688e-05	0.00107873
ENSMUSG00000043243.15	Niban3	-1.373	0.275228	9.54655e-05	0.00107958
ENSMUSG00000091071.2	1700030C10Rik	-2.02036	0.726564	9.6125e-05	0.00108608
ENSMUSG00000059142.16	Zfp945	-1.47909	1.73699	9.61836e-05	0.0010865
ENSMUSG00000024423.6	Impact	-1.47676	1.63964	9.70226e-05	0.00109454
ENSMUSG00000004565.15	Pnpla6	-1.51574	2.82327	9.73668e-05	0.00109768
ENSMUSG00000107392.1	Pramel35	-2.31142	0.0391941	9.77716e-05	0.00110151
ENSMUSG00000099954.1	Gm28112	-1.41205	-0.0720933	9.78995e-05	0.00110271
ENSMUSG00000019982.15	Myb	-1.46894	2.34316	9.89369e-05	0.0011139
ENSMUSG00000082498.1	Gm12937	-1.65383	-0.209146	9.9224e-05	0.00111689
ENSMUSG00000016494.9	Cd34	-1.52423	2.23238	9.93423e-05	0.00111748
ENSMUSG00000090115.7	Usp49	-1.16536	0.250169	9.96452e-05	0.00112015
ENSMUSG00000117276.1	Gm49910	-1.75744	-0.335849	9.96672e-05	0.00112015
ENSMUSG00000025579.14	Gaa	-1.47346	1.90673	9.97159e-05	0.00112016
ENSMUSG00000089911.4	Mfsd14a	-1.28306	1.34531	9.97814e-05	0.00112044
ENSMUSG00000096426.2	Btbd35f24	-1.75281	-0.36479	0.000100354	0.00112613
ENSMUSG00000091416.2	Gm6327	-1.41184	-0.327368	0.000100866	0.00113113
ENSMUSG00000091971.3	Hspa1a	-1.99108	1.62435	0.000101962	0.00114206
ENSMUSG00000097452.2	Gm2824	-1.28799	0.906737	0.0001021	0.00114321
ENSMUSG00000086820.1	Gm11465	-1.11219	-0.366492	0.000102431	0.00114566
ENSMUSG00000097625.1	NA	-1.48228	0.250636	0.000102775	0.0011485
ENSMUSG00000020689.4	Itgb3	-1.07017	0.627742	0.000102759	0.0011485
ENSMUSG00000023905.15	Tnfrsf12a	-1.33925	0.282582	0.000102913	0.0011498
ENSMUSG00000038094.15	Atp13a4	-1.20995	1.29469	0.000103213	0.00115213
ENSMUSG00000069248.11	Serpinb6e	-1.71434	0.193694	0.00010348	0.00115465
ENSMUSG00000021595.18	Nsun2	-1.38862	1.26828	0.000104009	0.00115975
ENSMUSG00000047787.7	Flrt1	-1.29135	2.18289	0.000104182	0.00116143
ENSMUSG00000038943.16	Prc1	-1.11414	1.66029	0.000104323	0.00116275
ENSMUSG00000078957.3	1700060C20Rik	-1.6225	0.23118	0.000105001	0.00116953
ENSMUSG00000103822.1	6030460B20Rik	-1.55545	0.117568	0.000106456	0.00118368
ENSMUSG00000027770.5	Dhx36	-1.15556	2.08442	0.000106486	0.00118375
ENSMUSG00000018796.13	Acsl1	-1.32523	2.54393	0.000106621	0.00118499
ENSMUSG00000097286.2	Gm26684	-1.07258	1.44234	0.000106817	0.00118692
ENSMUSG00000047492.5	Inhbe	-1.2452	1.96571	0.000106858	0.00118711
ENSMUSG00000108842.1	Gm45001	-1.44422	-0.0234672	0.000107893	0.00119704
ENSMUSG00000108056.1	Gm43941	-2.06028	2.62453	0.000108695	0.00120359
ENSMUSG00000083305.2	Gm13315	-1.72609	-0.31871	0.000108819	0.00120464
ENSMUSG00000081772.1	Gm13131	-1.94934	-0.00734411	0.000109344	0.00120999
ENSMUSG00000086905.1	Gm13716	-2.21151	0.00795245	0.000109781	0.00121324
ENSMUSG00000065642.1	Snora69	-1.64943	-0.430415	0.000110248	0.00121735
ENSMUSG00000010110.17	Stx5a	-1.2172	0.605382	0.000110718	0.00122175
ENSMUSG00000116464.1	Gm49523	-1.98192	0.686837	0.000110789	0.00122225
ENSMUSG00000104198.1	Trbv9	-1.70355	-0.396069	0.000110811	0.00122225
ENSMUSG00000109105.1	Gm44873	-1.26498	0.0828474	0.000110959	0.00122336
ENSMUSG00000100863.1	Gm12669	-2.16346	1.0345	0.000112265	0.00123695
ENSMUSG00000057551.10	Zfp317	-1.38698	0.429377	0.000112716	0.00124139
ENSMUSG00000085977.1	Gm5970	-1.76362	-0.176499	0.000112956	0.00124295
ENSMUSG00000082519.1	Vamp7-ps	-1.94022	0.0857841	0.000113072	0.00124396
ENSMUSG00000088950.1	NA	-1.68719	-0.392285	0.000113778	0.00125092
ENSMUSG00000089436.1	NA	-1.83056	-0.38619	0.000114925	0.00126082
ENSMUSG00000062397.8	Zfp706	-1.28702	0.71102	0.000115024	0.00126163
ENSMUSG00000109268.1	9530078K11Rik	-1.72804	0.317545	0.000115159	0.0012623
ENSMUSG00000074364.6	Ehd2	-1.06363	0.791161	0.000115143	0.0012623
ENSMUSG00000029366.10	Dck	-1.19601	0.473795	0.000115365	0.00126429
ENSMUSG00000031173.13	Otc	-1.4321	0.959425	0.000115919	0.00126954
ENSMUSG00000112289.1	1110019B22Rik	-1.57835	-0.169228	0.000118601	0.00129585
ENSMUSG00000053389.4	Tas2r107	-1.69009	-0.00921759	0.000118984	0.00129976
ENSMUSG00000026090.16	Cracdl	-1.29759	3.77079	0.000119423	0.00130393
ENSMUSG00000092494.2	Gm20420	-1.99912	1.65902	0.000119712	0.00130603
ENSMUSG00000027356.8	Fermt1	-1.14761	0.684926	0.000120121	0.00130938
ENSMUSG00000087406.1	E130215H24Rik	-1.79214	0.256652	0.000120356	0.00131138
ENSMUSG00000086381.1	AV064505	-1.86559	-0.246578	0.000120693	0.00131449
ENSMUSG00000031618.13	Nr3c2	-1.03428	0.909123	0.000121732	0.0013244
ENSMUSG00000031782.15	Coq9	-1.53815	0.863971	0.00012243	0.00133142
ENSMUSG00000034919.2	Ttc22	-1.13818	0.983168	0.000122655	0.0013333
ENSMUSG00000117520.1	Gm50064	-1.75669	0.250468	0.000122952	0.00133624
ENSMUSG00000030521.11	Mphosph10	-1.75754	2.5857	0.000123048	0.00133672
ENSMUSG00000027291.15	Vps39	-1.09099	1.37434	0.000123712	0.0013425
ENSMUSG00000031671.11	Setd6	-1.80364	1.22815	0.000124377	0.00134857
ENSMUSG00000038481.13	Cdk19	-1.35815	1.36303	0.000125992	0.00136232
ENSMUSG00000028426.10	Rad23b	-1.22185	1.64213	0.000126302	0.00136481
ENSMUSG00000098425.1	NA	-2.72573	2.68396	0.000126457	0.0013662
ENSMUSG00000085173.1	Gm2869	-1.85658	0.107944	0.000126628	0.00136717
ENSMUSG00000031021.13	Tmem9b	-1.68025	2.69963	0.000126847	0.00136925
ENSMUSG00000048905.5	Bnip5	-1.15828	0.748892	0.000127127	0.00137168
ENSMUSG00000022761.12	Lztr1	-1.34437	1.17857	0.000128021	0.00138046
ENSMUSG00000066803.2	Vmn1r84	-1.56848	1.56298	0.000128101	0.00138103
ENSMUSG00000006763.14	Saal1	-1.1776	1.46197	0.000128682	0.00138681
ENSMUSG00000108659.1	Gm34121	-1.20726	0.542559	0.000129257	0.00139261
ENSMUSG00000052912.7	Smarca5-ps	-1.74746	0.944739	0.000129349	0.0013933
ENSMUSG00000116904.1	Gm49640	-1.93812	-0.269264	0.000129623	0.00139567
ENSMUSG00000094406.1	NA	-1.60757	-0.42688	0.000129773	0.00139699
ENSMUSG00000033740.17	St18	-1.12584	1.15022	0.000130225	0.00140097
ENSMUSG00000022249.14	Ttc23l	-1.45185	0.982177	0.000131208	0.00141065
ENSMUSG00000109042.1	Gm44991	-1.43002	-0.396738	0.000131607	0.00141375
ENSMUSG00000073007.10	Tent5d	-1.0489	0.246074	0.000132531	0.00142218
ENSMUSG00000040613.14	Apobec1	-1.39402	1.17541	0.000132598	0.0014226
ENSMUSG00000113599.1	9530014B07Rik	-1.79047	-0.0411335	0.000133093	0.00142701
ENSMUSG00000020516.15	Rps6kb1	-1.16917	2.07897	0.000133327	0.00142862
ENSMUSG00000025468.15	Caly	-1.39922	0.0112293	0.000134141	0.00143614
ENSMUSG00000024601.8	Isoc1	-1.26578	0.657338	0.000134247	0.00143667
ENSMUSG00000008859.8	Rala	-1.22243	0.41454	0.000134593	0.00143977
ENSMUSG00000048693.5	Olfr435	-1.4451	0.430695	0.000134809	0.00144148
ENSMUSG00000086742.8	Gm16201	-1.42221	0.688677	0.000136093	0.00145246
ENSMUSG00000113331.1	3110009F21Rik	-1.52304	0.688527	0.000136728	0.00145803
ENSMUSG00000022055.7	Nefl	-1.30086	2.8776	0.000137952	0.00146862
ENSMUSG00000095486.2	Vmn2r22	-1.99985	1.43013	0.0001382	0.00147095
ENSMUSG00000042675.15	Ypel3	-1.63599	1.48293	0.000138877	0.00147724
ENSMUSG00000026975.10	Dph7	-1.14643	-0.0799322	0.000139014	0.00147838
ENSMUSG00000028518.8	Prkaa2	-1.23319	1.79723	0.000140903	0.00149473
ENSMUSG00000082542.2	Gm13311	-1.39725	-0.411479	0.000141013	0.00149559
ENSMUSG00000030144.4	Clec4d	-2.07819	0.69807	0.000141693	0.00150188
ENSMUSG00000061969.8	Gm5581	-1.46839	0.45378	0.000142392	0.00150802
ENSMUSG00000117400.1	Gm50057	-1.95411	1.56003	0.000142723	0.00151122
ENSMUSG00000106602.1	4930405L22Rik	-1.54366	-0.175419	0.000143045	0.001514
ENSMUSG00000052525.14	Spdya	-1.50087	0.546362	0.000143299	0.00151574
ENSMUSG00000087688.1	Gm11300	-1.61279	-0.287989	0.00014355	0.00151809
ENSMUSG00000106143.1	Gm43735	-1.75578	0.697785	0.000145715	0.00153906
ENSMUSG00000020076.7	Ddx50	-1.137	2.22479	0.000146276	0.00154419
ENSMUSG00000107450.1	Gm2522	-2.13121	1.21968	0.000146914	0.00154948
ENSMUSG00000027347.18	Rasgrp1	-1.30082	1.65143	0.000147412	0.00155378
ENSMUSG00000031991.10	Spata19	-1.47654	-0.18077	0.000147472	0.00155409
ENSMUSG00000070867.4	Trabd2b	-1.34696	1.20145	0.000148489	0.00156378
ENSMUSG00000031383.8	Dusp9	-1.16064	0.323503	0.000148514	0.00156378
ENSMUSG00000108765.1	Gm44580	-1.79837	-0.328412	0.000148926	0.00156747
ENSMUSG00000045104.8	Ldhb-ps	-1.8784	0.326948	0.000149073	0.00156855
ENSMUSG00000104571.1	Gm43010	-1.60098	0.479891	0.00014984	0.00157547
ENSMUSG00000091212.1	Krtap11-1	-1.56642	-0.269058	0.000150039	0.0015769
ENSMUSG00000106284.1	Gm43139	-1.92851	-0.12805	0.00015036	0.00157941
ENSMUSG00000024905.15	Tesmin	-1.20128	1.49826	0.00015037	0.00157941
ENSMUSG00000032514.11	Ttc21a	-1.01129	0.950642	0.000150508	0.00158021
ENSMUSG00000104842.1	Gm42821	-1.41698	-0.360997	0.000150838	0.00158335
ENSMUSG00000019892.13	Lrriq1	-1.17191	1.29552	0.000151937	0.00159358
ENSMUSG00000027674.16	Pex5l	-1.18028	2.16318	0.000152285	0.00159624
ENSMUSG00000106800.1	1700030N18Rik	-1.58931	-0.161723	0.000152747	0.0016001
ENSMUSG00000038671.15	Arfrp1	-1.69726	2.03212	0.000153328	0.00160453
ENSMUSG00000086401.1	Gm15559	-1.33448	0.47031	0.000153233	0.00160453
ENSMUSG00000065293.1	Gm26124	-1.88379	0.0210417	0.000154023	0.00161139
ENSMUSG00000086843.3	E030013I19Rik	-1.75999	1.71781	0.000154557	0.00161574
ENSMUSG00000114322.1	Gm47041	-1.24334	-0.0519039	0.000154536	0.00161574
ENSMUSG00000036046.14	5031439G07Rik	-1.33246	1.74799	0.000156564	0.00163371
ENSMUSG00000110672.1	Gm45786	-1.5239	0.143751	0.000156924	0.0016368
ENSMUSG00000024670.16	Cd6	-1.30589	0.324884	0.000157726	0.00164382
ENSMUSG00000049018.8	Olfr368	-1.78165	-0.115905	0.000160192	0.00166714
ENSMUSG00000031875.7	Cmtm3	-1.02846	0.083246	0.000161023	0.00167443
ENSMUSG00000099151.1	NA	-2.07856	1.3997	0.000162183	0.00168545
ENSMUSG00000026712.3	Mrc1	-1.2584	1.39684	0.000162582	0.00168891
ENSMUSG00000034994.10	Eef2	-1.25546	2.28426	0.000163158	0.00169456
ENSMUSG00000082285.1	Gm14069	-2.04447	-0.227589	0.000164153	0.0017035
ENSMUSG00000097854.1	Gm26602	-1.10831	-0.429816	0.000165429	0.0017143
ENSMUSG00000114526.1	A930015P04Rik	-1.22636	-0.385567	0.00016619	0.00172184
ENSMUSG00000040506.16	Ambra1	-1.02896	1.24735	0.00016655	0.00172452
ENSMUSG00000111394.1	Gm49759	-1.19368	1.29698	0.00016672	0.00172558
ENSMUSG00000094379.2	Vmn1r202	-1.31693	0.378413	0.000166824	0.0017263
ENSMUSG00000032334.10	Loxl1	-1.10006	0.607426	0.000167079	0.00172825
ENSMUSG00000092428.1	Gm20545	-1.84037	-0.142438	0.000167189	0.00172836
ENSMUSG00000050714.9	Zbtb26	-1.04119	0.902191	0.000167192	0.00172836
ENSMUSG00000036816.4	Atoh7	-1.44398	1.86984	0.000168276	0.00173816
ENSMUSG00000027679.13	Dnajc19	-1.27087	1.98281	0.000169595	0.00175037
ENSMUSG00000105600.1	Gm5987	-1.83468	1.14728	0.000171573	0.00176864
ENSMUSG00000102588.1	Gm37444	-1.84267	0.185692	0.000172548	0.00177761
ENSMUSG00000026932.14	Nacc2	-1.06404	1.53739	0.000173124	0.00178246
ENSMUSG00000083669.5	Mif-ps4	-1.66759	0.21261	0.000174553	0.00179441
ENSMUSG00000104923.1	Gm5865	-1.51534	-0.316587	0.000174566	0.00179441
ENSMUSG00000047368.3	Abhd17b	-1.01513	0.61408	0.000174745	0.00179553
ENSMUSG00000024160.16	Spsb3	-1.47856	1.07856	0.000175933	0.00180611
ENSMUSG00000022201.16	Zfr	-1.18816	2.42501	0.000175951	0.00180611
ENSMUSG00000037815.6	Ctnna1	-1.12222	0.913006	0.000176326	0.00180959
ENSMUSG00000041997.16	Tlk1	-1.05936	2.50779	0.000177318	0.00181758
ENSMUSG00000113434.1	3200001D21Rik	-1.10856	-0.199129	0.000178519	0.00182806
ENSMUSG00000036834.16	Plch1	-1.2244	1.46525	0.000179456	0.00183471
ENSMUSG00000056812.13	St8sia3	-1.27174	1.27805	0.000179684	0.0018363
ENSMUSG00000117322.1	6330415G19Rik	-1.2891	0.0322531	0.000179918	0.00183796
ENSMUSG00000065193.1	Gm23459	-1.89545	-0.205698	0.000180013	0.00183857
ENSMUSG00000019823.17	Mical1	-1.33111	1.33272	0.000180126	0.00183935
ENSMUSG00000024729.7	Ms4a20	-1.19303	0.398839	0.000181522	0.00185138
ENSMUSG00000108912.1	E230020D15Rik	-1.27341	1.16381	0.000182785	0.00186129
ENSMUSG00000020246.13	Hcfc2	-1.33562	1.06019	0.000183452	0.00186733
ENSMUSG00000103831.1	Gm37608	-1.59916	0.549018	0.000183561	0.00186807
ENSMUSG00000113093.1	Gm36862	-1.38412	-0.268692	0.000183622	0.00186831
ENSMUSG00000052336.7	Cx3cr1	-1.45267	1.45179	0.000184218	0.00187326
ENSMUSG00000064435.1	Gm25588	-2.11462	-0.143518	0.000184615	0.00187692
ENSMUSG00000045498.1	Pcdhb3	-1.23991	0.338652	0.000185126	0.00188137
ENSMUSG00000112352.1	Gm40617	-1.51181	0.201387	0.000185521	0.00188464
ENSMUSG00000086964.1	Gm15948	-1.63961	-0.402148	0.000186337	0.00189217
ENSMUSG00000028545.13	Bend5	-1.41184	0.981959	0.000189616	0.00192165
ENSMUSG00000081130.1	Gm8217	-1.64829	-0.182379	0.00018979	0.00192265
ENSMUSG00000090486.2	BC035947	-1.3308	-0.0252921	0.00019021	0.00192537
ENSMUSG00000109294.1	Gm44808	-1.30401	-0.439417	0.000190657	0.00192875
ENSMUSG00000031458.8	Coprs	-1.18642	0.508651	0.000191043	0.00193227
ENSMUSG00000110129.1	Gm45453	-1.37166	-0.3601	0.000194483	0.00196318
ENSMUSG00000030980.17	Knop1	-1.10171	0.842614	0.000194839	0.0019656
ENSMUSG00000085735.1	Mettl5os	-1.6884	0.56864	0.00019516	0.00196768
ENSMUSG00000098121.1	Gm27038	-1.89398	0.151717	0.000195228	0.00196797
ENSMUSG00000113497.1	Gm18030	-1.07274	1.62945	0.000196542	0.00197809
ENSMUSG00000027716.13	Trpc3	-1.03629	0.761206	0.000197014	0.00198245
ENSMUSG00000111085.1	Gm7607	-1.56366	-0.338557	0.000197756	0.00198796
ENSMUSG00000075279.5	Mrpl23-ps1	-1.19303	0.37387	0.000197912	0.00198874
ENSMUSG00000030861.15	Acadsb	-1.1629	1.36252	0.000198323	0.00199209
ENSMUSG00000041654.15	Slc39a11	-1.29331	0.835368	0.00019838	0.00199227
ENSMUSG00000085465.1	Gm15347	-1.98738	2.27756	0.00020033	0.00201064
ENSMUSG00000113046.1	Gm48579	-1.51714	-0.360674	0.000200446	0.00201064
ENSMUSG00000024399.5	Ltb	-1.14595	0.00605778	0.000200382	0.00201064
ENSMUSG00000110840.1	Gm47496	-1.55521	-0.0549725	0.000200941	0.00201442
ENSMUSG00000028240.2	Cyp7a1	-1.27969	0.794809	0.000202974	0.00203281
ENSMUSG00000066026.14	Dhrs3	-1.13029	0.916204	0.000203162	0.00203429
ENSMUSG00000049583.15	Grm5	-1.08618	1.97908	0.000203248	0.00203475
ENSMUSG00000070343.3	Gm10288	-1.58992	-0.0685421	0.000205323	0.00205392
ENSMUSG00000111212.1	5330432J10Rik	-1.34438	0.761901	0.000207473	0.00207339
ENSMUSG00000019874.11	Fabp7	-1.80331	0.486851	0.000207983	0.00207626
ENSMUSG00000046519.15	Golph3l	-1.24479	0.0675044	0.000208005	0.00207626
ENSMUSG00000113333.1	Gm19011	-1.75363	-0.26753	0.000208478	0.00208018
ENSMUSG00000024308.15	Tapbp	-1.01841	0.24632	0.000210264	0.00209635
ENSMUSG00000107287.1	Gm43458	-1.22358	-0.430802	0.000210793	0.00210123
ENSMUSG00000021557.15	Agtpbp1	-1.17908	3.21942	0.000210883	0.00210171
ENSMUSG00000032525.15	Nktr	-1.10106	2.78164	0.000211716	0.00210836
ENSMUSG00000103900.1	Gm37500	-1.07737	-0.181918	0.000212739	0.00211649
ENSMUSG00000087439.1	Gm15788	-1.4892	-0.357748	0.00021284	0.00211708
ENSMUSG00000096975.1	NA	-1.61205	-0.285127	0.000213347	0.00212136
ENSMUSG00000032338.9	Hcn4	-1.0904	1.17181	0.000213354	0.00212136
ENSMUSG00000082717.1	Gm13087	-1.40873	-0.396459	0.000214091	0.00212788
ENSMUSG00000100450.1	Gm9443	-1.81366	1.24782	0.000215647	0.00214166
ENSMUSG00000084274.2	Ptma-ps2	-1.51097	1.46667	0.000215817	0.00214293
ENSMUSG00000086935.1	Gm15956	-1.70691	-0.103803	0.000216646	0.00214991
ENSMUSG00000068396.9	Rpl34-ps1	-1.76449	0.430022	0.000218467	0.00216462
ENSMUSG00000104076.1	Gm37026	-1.44344	-0.207848	0.000219387	0.00217162
ENSMUSG00000088239.1	NA	-1.61182	-0.389577	0.000220178	0.00217776
ENSMUSG00000101206.1	Gm5266	-1.42197	-0.163003	0.000220234	0.00217789
ENSMUSG00000022518.16	4930562C15Rik	-1.03548	2.57365	0.000221551	0.00218837
ENSMUSG00000104867.1	Gm43728	-1.59683	1.08255	0.000221882	0.00219122
ENSMUSG00000032875.8	Arhgef17	-1.0358	1.81715	0.000223974	0.00220932
ENSMUSG00000024787.13	Snx15	-1.18636	0.22849	0.000226442	0.00223021
ENSMUSG00000018286.6	Psmb6	-1.74406	0.43671	0.00022806	0.00224312
ENSMUSG00000084981.7	Gm15962	-1.48079	-0.400939	0.000229125	0.00225229
ENSMUSG00000068921.14	Dap3	-1.13753	1.07004	0.000230605	0.00226422
ENSMUSG00000037112.16	Sik2	-1.02227	1.06175	0.000230949	0.00226542
ENSMUSG00000113469.1	Gm7065	-1.41481	-0.291187	0.000231795	0.00227285
ENSMUSG00000003031.14	Cdkn1b	-1.24847	1.2465	0.000232074	0.00227471
ENSMUSG00000063362.13	Alg11	-1.22649	0.762737	0.000233195	0.0022835
ENSMUSG00000090255.7	4921534H16Rik	-1.57616	1.29463	0.000233433	0.00228452
ENSMUSG00000006262.15	Mob1b	-1.20704	2.63831	0.000233966	0.00228886
ENSMUSG00000084247.1	Gm14566	-1.87724	-0.010306	0.000236603	0.00231112
ENSMUSG00000086379.7	1700026D11Rik	-1.23706	1.06349	0.000237202	0.00231608
ENSMUSG00000083174.1	Gm7190	-1.57167	-0.0190533	0.000240944	0.00234723
ENSMUSG00000009863.14	Sdhb	-1.17315	0.597849	0.00024126	0.00234985
ENSMUSG00000116564.1	Riok2	-1.42748	0.983427	0.000242812	0.00236182
ENSMUSG00000104825.1	Gm40330	-1.57512	-0.363533	0.000243781	0.00236899
ENSMUSG00000097907.1	Raxos1	-1.15344	0.296541	0.000244837	0.00237688
ENSMUSG00000051617.3	Krt9	-1.29183	0.648348	0.000247619	0.0024008
ENSMUSG00000106393.1	Gm43562	-1.16235	-0.472837	0.000247871	0.00240279
ENSMUSG00000115133.1	Gm20167	-1.42992	-0.383248	0.000249238	0.00241466
ENSMUSG00000009734.18	Pou6f2	-1.24338	2.54261	0.000250425	0.00242386
ENSMUSG00000029410.11	Ppef2	-1.23419	1.11298	0.000251288	0.00243129
ENSMUSG00000102926.1	Gm37151	-1.60753	1.75995	0.000252274	0.00243759
ENSMUSG00000097317.1	NA	-1.11339	0.910317	0.000252429	0.00243864
ENSMUSG00000014959.12	Gorasp2	-1.05073	1.3425	0.000252864	0.00244145
ENSMUSG00000102447.1	Gm6621	-1.64074	0.369221	0.000253121	0.00244347
ENSMUSG00000040009.6	Gnaz	-1.09864	1.69333	0.000253539	0.00244658
ENSMUSG00000112358.1	Gm33869	-1.38472	0.0609688	0.000256051	0.00246895
ENSMUSG00000110137.1	Gm45577	-1.34824	0.084837	0.000256354	0.00247048
ENSMUSG00000083911.1	Gm4342	-1.55839	0.130035	0.00025734	0.00247904
ENSMUSG00000086994.1	Gm13402	-1.3864	-0.437085	0.000259841	0.00249983
ENSMUSG00000035964.8	Tmem59l	-1.39204	0.231959	0.000260867	0.00250782
ENSMUSG00000104960.1	Snhg8	-1.36881	0.288723	0.000261906	0.00251686
ENSMUSG00000011114.18	Tbrg1	-1.0786	1.22086	0.00026308	0.00252576
ENSMUSG00000080616.1	Gm22152	-1.63586	-0.352822	0.000264888	0.00254025
ENSMUSG00000031431.13	Tsc22d3	-1.05806	0.410645	0.000265824	0.00254731
ENSMUSG00000032380.8	Dapk2	-1.30503	1.05222	0.000266837	0.00255462
ENSMUSG00000048574.9	Ccnb1-ps	-1.3517	-0.218364	0.000267523	0.00255974
ENSMUSG00000085951.1	Gm12145	-1.6785	-0.285725	0.000268408	0.00256629
ENSMUSG00000082508.1	Rpl15-ps4	-1.60088	-0.0616491	0.000269674	0.00257695
ENSMUSG00000088252.1	Snord13	-1.48438	-0.031579	0.000271095	0.0025875
ENSMUSG00000058188.3	Olfr746	-1.93044	-0.0644266	0.00027209	0.00259421
ENSMUSG00000096405.3	4930474N05Rik	-1.54495	1.68707	0.000272993	0.00260041
ENSMUSG00000113168.1	Gm7614	-1.6579	-0.189583	0.000273384	0.00260363
ENSMUSG00000117648.1	Gm32282	-1.3304	0.0079381	0.000273502	0.00260378
ENSMUSG00000081292.1	Gm15018	-1.77424	0.255982	0.000274497	0.00261179
ENSMUSG00000111316.1	Gm47344	-1.55536	-0.321304	0.000276426	0.00262819
ENSMUSG00000102510.2	Olfr1398-ps1	-1.30579	-0.267391	0.000276645	0.00262978
ENSMUSG00000044597.4	Mycs	-1.31992	0.361614	0.00027969	0.00265674
ENSMUSG00000047583.9	Tyw3	-1.13745	0.382628	0.00028156	0.00267102
ENSMUSG00000020538.15	Srebf1	-1.0898	0.762292	0.000283431	0.00268578
ENSMUSG00000000296.8	Tpd52l1	-1.64075	0.55286	0.000284135	0.00269195
ENSMUSG00000116414.1	Gm4432	-1.5035	-0.253106	0.000284921	0.00269801
ENSMUSG00000038782.6	1700028J19Rik	-1.66357	0.507086	0.000285904	0.0027057
ENSMUSG00000092437.1	Rpl9-ps9	-1.86205	-0.183743	0.000289684	0.0027364
ENSMUSG00000110674.1	Gm45892	-1.00243	0.695401	0.000290206	0.00274032
ENSMUSG00000117301.1	Gm35883	-1.51183	-0.361177	0.000290473	0.00274197
ENSMUSG00000090941.1	Gm17212	-1.41194	-0.330468	0.000292177	0.00275485
ENSMUSG00000034341.17	Wbp2	-1.99058	3.72503	0.000292234	0.00275488
ENSMUSG00000035992.15	Fnip1	-1.23671	2.33783	0.000292702	0.00275878
ENSMUSG00000086111.1	Gm15326	-1.38319	-0.0216974	0.000293321	0.00276411
ENSMUSG00000109104.1	Gm6108	-1.85725	-0.00277679	0.000293423	0.00276456
ENSMUSG00000028998.6	Tomm7	-1.4322	0.216088	0.000293645	0.00276614
ENSMUSG00000114658.1	Gm30008	-1.37365	-0.246665	0.000294212	0.00276943
ENSMUSG00000106646.1	Gm42483	-1.35587	-0.0701919	0.000296936	0.00279302
ENSMUSG00000064363.1	mt-Nd4	-1.30115	7.79296	0.000297135	0.00279438
ENSMUSG00000109775.1	Gm45297	-1.50001	0.62003	0.000298305	0.00280279
ENSMUSG00000081847.1	Btf3-ps7	-1.26876	-0.423445	0.000299045	0.00280664
ENSMUSG00000032187.16	Smarca4	-1.0639	1.28225	0.000303014	0.00283659
ENSMUSG00000028222.2	Calb1	-1.29787	2.23585	0.000303757	0.00284198
ENSMUSG00000093924.1	Gm12623	-1.86683	0.0559579	0.000303824	0.0028421
ENSMUSG00000103433.1	Gm2272	-1.50777	0.528025	0.000304423	0.00284718
ENSMUSG00000039016.5	Timm8b	-1.5515	0.620174	0.000304559	0.00284793
ENSMUSG00000024975.12	Pdcd4	-1.15182	0.584353	0.000304815	0.0028497
ENSMUSG00000027454.10	Gins1	-1.41652	0.570218	0.000307165	0.00286861
ENSMUSG00000063873.10	Slc24a3	-1.3647	2.21813	0.000309542	0.0028887
ENSMUSG00000107541.1	Gm44336	-1.53265	-0.0217861	0.000310254	0.00289482
ENSMUSG00000108483.1	Gm45184	-1.52871	0.537025	0.000311701	0.00290672
ENSMUSG00000032011.5	Thy1	-1.46056	2.11856	0.000312156	0.0029095
ENSMUSG00000104291.1	A130071D04Rik	-1.43531	1.78011	0.000312882	0.00291507
ENSMUSG00000104031.1	Gm17771	-2.05454	0.87026	0.000313442	0.00291869
ENSMUSG00000088223.1	NA	-1.3607	-0.45521	0.000314839	0.00293063
ENSMUSG00000032500.10	Dclk3	-1.46427	0.828459	0.000315361	0.00293496
ENSMUSG00000097466.8	D430036J16Rik	-1.07584	0.10278	0.000317034	0.00294892
ENSMUSG00000020319.9	Wdpcp	-1.23221	0.953203	0.000317891	0.00295527
ENSMUSG00000115417.1	Gm48949	-1.47824	-0.348107	0.000319141	0.00296527
ENSMUSG00000020214.10	Glipr1l2	-1.45277	0.782446	0.000319272	0.0029654
ENSMUSG00000101818.1	Gm28269	-1.64671	-0.152245	0.000319929	0.00297043
ENSMUSG00000041360.7	Pum3	-1.49915	1.24753	0.000321107	0.00297974
ENSMUSG00000102162.1	Gm2367	-1.38788	-0.0910124	0.000321976	0.00298726
ENSMUSG00000066839.12	Ecsit	-1.48081	1.4459	0.000323556	0.0029981
ENSMUSG00000038180.11	Spag4	-1.09933	1.51098	0.000324581	0.00300542
ENSMUSG00000040952.16	Rps19	-1.13643	1.17694	0.000324691	0.00300589
ENSMUSG00000085790.1	Gm12729	-1.96329	-0.00728436	0.000325139	0.00300895
ENSMUSG00000047108.4	Dnajb7	-1.39099	0.0659816	0.00032606	0.00301583
ENSMUSG00000037492.16	Zmat4	-1.26316	2.00472	0.000327078	0.0030247
ENSMUSG00000052155.5	Acvr2a	-1.17475	1.21442	0.000328602	0.0030366
ENSMUSG00000103807.1	Trbv6	-1.25424	-0.44874	0.000330271	0.00305091
ENSMUSG00000029076.14	Sdf4	-1.0419	0.77966	0.000330782	0.00305508
ENSMUSG00000085275.1	Gm14487	-1.30002	0.166584	0.000331119	0.00305764
ENSMUSG00000092392.1	Gm20546	-1.42895	0.104583	0.000331199	0.00305783
ENSMUSG00000091806.1	Gm5258	-1.51582	0.42911	0.000331474	0.00305981
ENSMUSG00000102268.1	Gm8826	-2.13721	2.25156	0.000334591	0.00308468
ENSMUSG00000114204.1	Gm47520	-1.84472	0.513898	0.000335121	0.00308901
ENSMUSG00000039838.11	Slc45a1	-1.00894	0.189263	0.000335273	0.00308985
ENSMUSG00000032867.8	Fbxw8	-1.06271	0.877062	0.00033587	0.00309423
ENSMUSG00000034248.7	Slc25a37	-1.53994	0.7961	0.000337017	0.00310424
ENSMUSG00000062198.5	2700097O09Rik	-1.41618	1.62819	0.000338806	0.0031151
ENSMUSG00000065382.1	Gm23097	-1.61865	-0.30513	0.00034017	0.00312539
ENSMUSG00000114032.1	Gm2139	-1.51018	-0.254989	0.000340671	0.00312886
ENSMUSG00000056270.3	Prr9	-1.75793	0.412213	0.000340962	0.00313097
ENSMUSG00000039873.4	Neurl2	-1.04213	-0.0757516	0.000341419	0.0031346
ENSMUSG00000116767.1	4930517M08Rik	-1.54415	-0.144008	0.000341588	0.00313503
ENSMUSG00000026918.16	Brd3	-1.07856	2.25441	0.000342154	0.00313966
ENSMUSG00000022314.10	Rad21	-1.19085	0.988924	0.000342747	0.00314408
ENSMUSG00000025702.15	Marchf8	-1.13803	1.62188	0.000342758	0.00314408
ENSMUSG00000032172.8	Olfm2	-1.43814	0.82269	0.000343094	0.00314659
ENSMUSG00000117412.1	Gm49979	-1.14539	0.700038	0.000343795	0.00315189
ENSMUSG00000088618.1	NA	-1.69478	-0.362994	0.000343971	0.00315293
ENSMUSG00000115760.1	Gm18909	-1.82494	0.724508	0.000346185	0.00317038
ENSMUSG00000091393.1	5330438I03Rik	-1.20319	0.495605	0.000348391	0.00318487
ENSMUSG00000112730.1	4930567K20Rik	-1.64258	0.242356	0.000350323	0.00320055
ENSMUSG00000109367.1	Gm18782	-1.31631	0.798627	0.000351642	0.00320942
ENSMUSG00000103663.1	2900037B21Rik	-1.67212	-0.151726	0.000352656	0.00321522
ENSMUSG00000089764.2	Gm16580	-1.7564	1.07351	0.000353238	0.00321938
ENSMUSG00000096882.1	NA	-1.4016	0.208582	0.000354692	0.00322917
ENSMUSG00000091745.1	Gm17098	-1.4056	-0.188975	0.000355687	0.0032365
ENSMUSG00000027244.14	Atg13	-1.24535	0.748227	0.000355856	0.00323746
ENSMUSG00000110057.1	Gm2225	-1.83232	0.691565	0.000356079	0.00323834
ENSMUSG00000089614.1	Gm23505	-2.03692	0.0990562	0.000357533	0.00324924
ENSMUSG00000037541.21	Shank2	-1.28308	2.21345	0.000358137	0.00325357
ENSMUSG00000104053.1	Gm38126	-1.24819	1.10071	0.000358429	0.00325507
ENSMUSG00000026342.10	Slc35f5	-1.01998	0.820783	0.000360903	0.00327637
ENSMUSG00000106872.1	Gm2189	-1.43965	-0.338646	0.000361207	0.00327855
ENSMUSG00000083818.1	Gm14908	-1.60612	0.0505101	0.000362861	0.00329122
ENSMUSG00000112621.1	Gm5173	-1.50276	-0.315132	0.000363969	0.00329951
ENSMUSG00000068134.13	Zfp120	-1.23967	0.777409	0.00036553	0.00331304
ENSMUSG00000050627.13	Gpd1l	-1.40232	2.04592	0.000366441	0.00331838
ENSMUSG00000044052.3	Ccr10	-1.10853	0.771571	0.000367154	0.00332425
ENSMUSG00000117567.1	Gm50056	-1.15188	-0.190473	0.000368542	0.00333504
ENSMUSG00000024498.15	Tcerg1	-1.18065	0.93672	0.000368686	0.00333575
ENSMUSG00000103936.1	Gm36965	-1.8157	-0.024767	0.000369131	0.003338
ENSMUSG00000075864.1	NA	-1.81538	-0.21628	0.000369489	0.00334053
ENSMUSG00000031779.3	Ccl22	-1.04099	-0.0624164	0.000369843	0.00334207
ENSMUSG00000112639.1	A730063M14Rik	-1.36336	0.826168	0.000370046	0.00334332
ENSMUSG00000021314.12	Amph	-1.20484	1.34742	0.000371986	0.00335906
ENSMUSG00000034570.12	Inpp5j	-1.00585	0.281696	0.000373551	0.00337081
ENSMUSG00000054237.5	Fra10ac1	-1.26712	1.11202	0.000373799	0.00337245
ENSMUSG00000021572.9	Cep72	-1.28255	1.18801	0.000377012	0.00339783
ENSMUSG00000029364.15	Wsb2	-1.14814	2.64498	0.000383093	0.00344413
ENSMUSG00000109568.1	Gm45074	-1.63617	-0.141322	0.000384949	0.00345838
ENSMUSG00000085205.1	Gm13185	-1.20802	-0.210127	0.000387446	0.00347652
ENSMUSG00000116220.1	A430088P11Rik	-1.15891	0.45175	0.000388183	0.00348008
ENSMUSG00000112179.1	Gm3213	-1.48915	-0.336991	0.00039042	0.00349584
ENSMUSG00000075512.5	Gm1587	-1.78569	0.7434	0.000390922	0.00349911
ENSMUSG00000026874.10	Hc	-1.32012	3.12962	0.000390902	0.00349911
ENSMUSG00000030199.16	Etv6	-1.22583	2.16848	0.000390993	0.00349912
ENSMUSG00000103412.1	Gm37340	-1.26318	0.0592789	0.00039186	0.00350627
ENSMUSG00000031633.4	Slc25a4	-1.31688	2.83506	0.000394397	0.00352774
ENSMUSG00000105528.1	Gm43519	-1.23516	0.311501	0.000395157	0.00353329
ENSMUSG00000030507.6	Dbx1	-1.20184	0.379335	0.000396801	0.00354737
ENSMUSG00000032263.14	Bckdhb	-1.29789	0.215731	0.000399761	0.00357009
ENSMUSG00000096829.1	NA	-2.05013	0.556613	0.00040045	0.00357499
ENSMUSG00000022309.9	Angpt1	-1.14858	0.80259	0.000404506	0.00360489
ENSMUSG00000066036.14	Ubr4	-1.05444	2.36633	0.000405022	0.0036076
ENSMUSG00000064664.1	Gm24459	-1.46477	-0.115811	0.000407611	0.00362749
ENSMUSG00000090853.1	Gm17364	-1.3994	-0.408474	0.000408556	0.00363401
ENSMUSG00000117473.1	Gm33948	-1.38241	0.866847	0.000408855	0.00363603
ENSMUSG00000045330.8	Magec2	-1.46344	0.0128435	0.000410543	0.00364914
ENSMUSG00000024224.5	Clpsl2	-1.45299	-0.373001	0.000413283	0.00366966
ENSMUSG00000082505.1	Gm14816	-1.48097	-0.326025	0.000414466	0.0036748
ENSMUSG00000079038.3	D130040H23Rik	-1.28679	0.785806	0.000414299	0.0036748
ENSMUSG00000105470.1	Gm42589	-1.31291	-0.459871	0.000415941	0.00368621
ENSMUSG00000027534.16	Snx16	-1.2899	1.03907	0.000418932	0.00370885
ENSMUSG00000028871.7	Rspo1	-1.0816	1.15791	0.000419825	0.003716
ENSMUSG00000014402.15	Tsg101	-1.3988	1.97118	0.000421537	0.00372609
ENSMUSG00000062511.6	4930512M02Rik	-1.63514	0.217123	0.000422205	0.00373071
ENSMUSG00000112237.1	D630033A02Rik	-1.02065	0.229923	0.000423036	0.00373611
ENSMUSG00000013465.19	Nelfb	-1.28765	1.12652	0.000423382	0.00373787
ENSMUSG00000083547.2	Gm13321	-1.51908	-0.345954	0.000423529	0.00373853
ENSMUSG00000074210.3	E130208F15Rik	-1.12358	-0.0371778	0.000423818	0.00373926
ENSMUSG00000029426.8	Scarb2	-1.11797	1.28359	0.000423812	0.00373926
ENSMUSG00000024136.14	Dnase1l2	-1.00371	-0.0296452	0.000423832	0.00373926
ENSMUSG00000087141.1	Plcxd2	-1.34139	2.11977	0.000426556	0.00376004
ENSMUSG00000100922.1	Gm8520	-1.50957	0.301226	0.000428342	0.00377253
ENSMUSG00000016308.12	Ube2a	-1.28072	0.585758	0.000429166	0.00377913
ENSMUSG00000041498.13	Kif14	-1.1349	2.01202	0.000429658	0.00378219
ENSMUSG00000097805.2	Gm17473	-1.35291	1.31479	0.000430477	0.00378726
ENSMUSG00000061184.8	Tmprss11c	-1.16374	0.194997	0.000430513	0.00378726
ENSMUSG00000024395.9	Lims2	-1.10161	0.84788	0.000431045	0.0037898
ENSMUSG00000017781.17	Pitpna	-1.59978	2.5693	0.000432099	0.00379776
ENSMUSG00000085929.1	Gm13421	-1.46839	0.173882	0.000432563	0.00379987
ENSMUSG00000035620.15	Ric8b	-1.12848	0.791838	0.000437207	0.00383407
ENSMUSG00000035785.6	Cmtm2b	-1.83297	1.2551	0.000439788	0.00385273
ENSMUSG00000053141.16	Ptprt	-1.01378	1.88575	0.000440751	0.00385918
ENSMUSG00000028109.14	Hormad1	-1.42171	0.992334	0.000441153	0.00386203
ENSMUSG00000040264.10	Gbp2b	-1.26828	0.603465	0.00044672	0.00390675
ENSMUSG00000083543.1	Gm14663	-1.29187	0.0558947	0.000447058	0.00390904
ENSMUSG00000001228.14	Uhrf1	-1.09762	1.41519	0.000447292	0.00391041
ENSMUSG00000112143.1	Gm35721	-1.01416	-0.249419	0.000450516	0.00393456
ENSMUSG00000087521.2	AI646519	-1.45605	0.241642	0.000450631	0.00393489
ENSMUSG00000026648.18	Dclre1c	-1.14404	2.01572	0.000457374	0.00398899
ENSMUSG00000080844.1	Gm14107	-1.33855	-0.454844	0.000462417	0.0040261
ENSMUSG00000038020.5	Rapgefl1	-1.16317	1.96064	0.000463087	0.00402987
ENSMUSG00000106582.1	Obox4-ps24	-1.28775	-0.465144	0.00046379	0.00403461
ENSMUSG00000113867.1	Gm47456	-1.35439	-0.341254	0.00046428	0.00403818
ENSMUSG00000040620.15	Dhx33	-1.02228	1.34227	0.00046825	0.00406786
ENSMUSG00000028936.15	Rpl22	-1.33188	0.662848	0.000468606	0.00407027
ENSMUSG00000111008.1	Gm31562	-1.46407	1.08515	0.000468701	0.0040704
ENSMUSG00000083382.1	Gm6433	-1.40252	-0.0792522	0.000469164	0.00407372
ENSMUSG00000102619.1	Gm37849	-1.36561	0.0330072	0.000469593	0.00407675
ENSMUSG00000019734.16	Tmc4	-1.00124	0.848606	0.000471398	0.00409103
ENSMUSG00000097381.2	A230087F16Rik	-1.22713	1.2308	0.000472424	0.00409785
ENSMUSG00000096727.2	Psmb9	-1.11686	0.73637	0.000473971	0.00410847
ENSMUSG00000108326.1	Gm17838	-1.4951	-0.292132	0.000474839	0.00411356
ENSMUSG00000030664.3	Sox6os	-1.41644	-0.184106	0.000479389	0.00414839
ENSMUSG00000059842.12	Zfp341	-1.09479	0.75826	0.000480418	0.00415589
ENSMUSG00000097138.1	NA	-1.44268	1.3496	0.000482055	0.00416863
ENSMUSG00000020620.14	Abca8b	-1.17679	1.52226	0.000484167	0.00418267
ENSMUSG00000027314.6	Dll4	-1.15536	1.04928	0.00048951	0.0042238
ENSMUSG00000030105.8	Arl8b	-1.32212	2.03792	0.000490788	0.0042334
ENSMUSG00000086679.2	Gm15551	-1.30302	-0.402747	0.000492978	0.00425086
ENSMUSG00000106694.1	Gm42894	-1.33552	0.545253	0.000493303	0.00425294
ENSMUSG00000034936.2	Arl4d	-1.4252	-0.129022	0.00049346	0.00425316
ENSMUSG00000032548.14	Slco2a1	-1.06113	2.4261	0.000495245	0.00426608
ENSMUSG00000116231.1	Gm36330	-1.39423	-0.235774	0.000495742	0.00426964
ENSMUSG00000090293.1	Gm17034	-1.51807	0.595381	0.000498437	0.00429068
ENSMUSG00000005442.13	Cic	-1.01712	1.75245	0.000498568	0.00429108
ENSMUSG00000096145.2	Vkorc1	-1.39272	-0.377082	0.000501172	0.00430696
ENSMUSG00000104573.1	Gm42886	-1.35818	-0.419816	0.000502109	0.00431355
ENSMUSG00000021611.9	Tert	-1.15337	1.22511	0.000502255	0.00431408
ENSMUSG00000026385.16	Dbi	-1.2556	0.788349	0.000504196	0.00432712
ENSMUSG00000068250.13	Amn1	-1.03895	2.69108	0.000504488	0.00432855
ENSMUSG00000104874.1	Gm43387	-1.58076	0.298119	0.000504638	0.00432873
ENSMUSG00000045575.1	Vmn1r233	-1.49933	-0.0526344	0.000505386	0.00433296
ENSMUSG00000108983.1	Gm44926	-1.38679	0.294295	0.000505294	0.00433296
ENSMUSG00000048668.16	Rhno1	-1.13297	0.70945	0.000505707	0.00433456
ENSMUSG00000086250.1	Gm14095	-1.74634	-0.0569762	0.000506005	0.00433536
ENSMUSG00000092305.1	Prps1l1	-1.43348	0.162885	0.000506877	0.00434137
ENSMUSG00000083594.1	Gm13722	-1.14746	0.362729	0.000508146	0.00434786
ENSMUSG00000027261.2	Hao1	-1.57124	1.33702	0.000509517	0.00435886
ENSMUSG00000066749.3	Olfr877	-1.44855	0.174621	0.000509629	0.00435909
ENSMUSG00000034825.14	Nrip3	-1.36111	2.93351	0.000510262	0.00436304
ENSMUSG00000022848.8	Slc49a4	-1.12939	1.04342	0.000510673	0.00436583
ENSMUSG00000102578.1	Gm10576	-1.13539	-0.449231	0.000514089	0.00439135
ENSMUSG00000107288.1	Gm42903	-1.46685	-0.0983322	0.000515905	0.00440538
ENSMUSG00000023921.9	Mmut	-1.2335	1.23005	0.000516183	0.00440702
ENSMUSG00000031326.2	Cdx4	-1.30494	1.12424	0.000523369	0.00445719
ENSMUSG00000100233.1	Gm20811	-1.76496	-0.205376	0.000523867	0.00446069
ENSMUSG00000113680.1	Gm47405	-1.76746	3.43143	0.000524712	0.00446639
ENSMUSG00000096393.1	Fam240a	-1.34236	-0.156245	0.000524894	0.0044672
ENSMUSG00000062515.3	Fabp4	-1.39601	1.08471	0.000527597	0.00448592
ENSMUSG00000046615.2	Actrt1	-1.54301	0.102228	0.000531071	0.00451
ENSMUSG00000113717.1	Gm40658	-1.14924	-0.31024	0.000534099	0.00453344
ENSMUSG00000101477.1	Gm18448	-1.57283	-0.322594	0.000536491	0.00455072
ENSMUSG00000071654.5	Uqcc3	-1.35588	0.175737	0.000538128	0.00456268
ENSMUSG00000103778.1	Gm36930	-1.51506	0.668665	0.000539954	0.00457478
ENSMUSG00000004540.7	Psg17	-1.50346	0.288838	0.000540158	0.00457574
ENSMUSG00000080555.2	NA	-1.13534	-0.471667	0.000541067	0.00458136
ENSMUSG00000106553.1	6720482G16Rik	-1.28557	-0.362904	0.000549592	0.0046441
ENSMUSG00000106208.1	Gm4734	-1.60016	0.480081	0.000551596	0.00465718
ENSMUSG00000041346.11	Wrap53	-1.01695	0.0329518	0.000556541	0.00469427
ENSMUSG00000117124.1	Gm49895	-1.25209	0.0927163	0.000559249	0.00471633
ENSMUSG00000057945.3	Gm17136	-1.26225	-0.215095	0.000559559	0.00471817
ENSMUSG00000097515.2	1700040D17Rik	-1.0848	-0.343598	0.000559766	0.00471914
ENSMUSG00000034311.3	Kif4	-1.21352	1.32813	0.000560065	0.0047201
ENSMUSG00000029669.14	Tspan12	-1.12048	0.811261	0.000561307	0.00472679
ENSMUSG00000024459.18	H2-M5	-1.09207	0.167273	0.000561852	0.00472969
ENSMUSG00000110762.1	Gm48229	-1.45275	-0.272834	0.000564842	0.0047486
ENSMUSG00000115595.1	Rps12-ps2	-1.51142	-0.0383598	0.000567973	0.00476943
ENSMUSG00000030104.9	Edem1	-1.00408	1.13136	0.000567886	0.00476943
ENSMUSG00000095635.1	NA	-1.56203	-0.0243382	0.000569266	0.00477683
ENSMUSG00000105711.1	Gm42598	-1.29907	0.316191	0.000569779	0.00477908
ENSMUSG00000100639.1	Scgb1b6-ps	-1.86102	-0.207751	0.000583711	0.00487272
ENSMUSG00000098682.8	Otx2os1	-1.19496	0.988624	0.000583935	0.00487379
ENSMUSG00000112729.1	Gm46231	-1.14958	-0.29495	0.0005856	0.00488529
ENSMUSG00000038521.17	C1s1	-1.1716	-0.0796854	0.000587724	0.00489902
ENSMUSG00000082894.1	Gm6480	-1.39095	-0.23537	0.000588209	0.00490145
ENSMUSG00000082511.1	Gm4915	-1.86915	0.304559	0.000594088	0.00494399
ENSMUSG00000083379.1	Gm4919	-1.19434	-0.400496	0.000594899	0.00494914
ENSMUSG00000029605.16	Oas1b	-1.21075	0.690969	0.000595557	0.00495298
ENSMUSG00000056832.14	Ttc26	-1.20752	1.39131	0.000596668	0.00496061
ENSMUSG00000114835.1	Gm48194	-1.29906	0.776018	0.000606896	0.00503792
ENSMUSG00000106876.1	Gm43456	-1.24968	-0.321332	0.000607102	0.00503792
ENSMUSG00000022805.17	Cfap91	-1.05436	1.21873	0.000612358	0.00507447
ENSMUSG00000020420.8	Zfp607a	-1.14588	0.172314	0.000613936	0.0050843
ENSMUSG00000111044.1	Gm47106	-1.05462	-0.0727844	0.000614562	0.00508702
ENSMUSG00000005873.5	Reep5	-1.49326	1.60162	0.000615621	0.00509329
ENSMUSG00000113233.1	Gm31063	-1.17535	-0.388909	0.000615951	0.0050952
[truncated: 949 more rows]
[truncated: 4 more columns]

## Sheet: 5D. GO Underexpressed
GO biological process complete	FDR p-value
cellular macromolecule localization (GO:0070727)	5.26e-07
macromolecule localization (GO:0033036)	7.14e-07
protein localization (GO:0008104)	7.63e-07
cellular localization (GO:0051641)	1.09e-05
regulation of cellular process (GO:0050794)	5.09e-05
regulation of biological process (GO:0050789)	9.23e-05
cellular component organization or biogenesis (GO:0071840)	9.9e-05
cellular component organization (GO:0016043)	0.000107
positive regulation of cellular process (GO:0048522)	0.000292
regulation of metabolic process (GO:0019222)	0.000314
regulation of cellular metabolic process (GO:0031323)	0.000418
regulation of macromolecule metabolic process (GO:0060255)	0.00249
establishment of protein localization (GO:0045184)	0.00258
positive regulation of biological process (GO:0048518)	0.00265
intracellular transport (GO:0046907)	0.0034
cellular component assembly (GO:0022607)	0.0034
regulation of signaling (GO:0023051)	0.00358
cellular component biogenesis (GO:0044085)	0.0052
establishment of protein localization to organelle (GO:0072594)	0.00671
nitrogen compound transport (GO:0071705)	0.00684
primary metabolic process (GO:0044238)	0.00691
nitrogen compound metabolic process (GO:0006807)	0.00699
intracellular protein transport (GO:0006886)	0.007
localization (GO:0051179)	0.00703
regulation of cell communication (GO:0010646)	0.00715
establishment of localization in cell (GO:0051649)	0.00847
regulation of cellular component organization (GO:0051128)	0.00927
developmental process (GO:0032502)	0.00973
protein transport (GO:0015031)	0.0105
protein localization to organelle (GO:0033365)	0.0113
protein targeting (GO:0006605)	0.0117
positive regulation of molecular function (GO:0044093)	0.0148
regulation of biological quality (GO:0065008)	0.0286
localization within membrane (GO:0051668)	0.0293
regulation of G1/S transition of mitotic cell cycle (GO:2000045)	0.0297
regulation of primary metabolic process (GO:0080090)	0.0301
positive regulation of protein metabolic process (GO:0051247)	0.0309
macromolecule metabolic process (GO:0043170)	0.0316
positive regulation of metabolic process (GO:0009893)	0.0332
negative regulation of cellular metabolic process (GO:0031324)	0.0337
hatching (GO:0035188)	0.0363
cellular response to organic substance (GO:0071310)	0.0366
cellular metabolic process (GO:0044237)	0.0367
organism emergence from protective structure (GO:0071684)	0.037
positive regulation of cellular component organization (GO:0051130)	0.0371
organic substance transport (GO:0071702)	0.0377
blastocyst hatching (GO:0001835)	0.0378
negative regulation of cellular process (GO:0048523)	0.038
positive regulation of catalytic activity (GO:0043085)	0.0383
organic substance metabolic process (GO:0071704)	0.0384
regulation of protein dephosphorylation (GO:0035304)	0.0385
regulation of mitotic cell cycle phase transition (GO:1901990)	0.0392
cellular macromolecule metabolic process (GO:0044260)	0.0395
protein localization to cell junction (GO:1902414)	0.0427
metabolic process (GO:0008152)	0.0441
regulation of neurogenesis (GO:0050767)	0.0448
multicellular organism development (GO:0007275)	0.045
regulation of developmental process (GO:0050793)	0.0472
